# Supplementary material for: The combination of lactoferrin and linolenic acid inhibits colorectal tumor growth through activating AMPK/JNK-related apoptosis pathway
Source: PeerJ. 2021 May 31;9:e11072. doi: 10.7717/peerj.11072 (PMC8174148; doi:10.7717/peerj.11072)
Supplement: Supplemental Information 2 [file peerj-09-11072-s002.xlsx]

## Sheet: Sheet1
Compound	m/z	Retention time (min)	mode	Adducts	Formula	Mass Error (ppm)	Isotope Similarity	Theoretical Isotope Distribution	Compound ID	Description	kingdom	super_class	class	KYC1	KYC2	KYC3	KYC4	KYC5	KYC6	KYLA1	KYLA2	KYLA3	KYLA4	KYLA5	KYLA6	KYLF1	KYLF2	KYLF3	KYLF4	KYLF5	KYLF6	KYLF+LA1	KYLF+LA2	KYLF+LA3	KYLF+LA4	KYLF+LA5	KYLF+LA6	av C	av LA	av LF	av LF+LA	fold LA/C	fold LF/C	fold LF+LA/C	fold LF/LA	fold LF+LA/LA	fold LF+LA/LF
2.59_307.1115m/z	307.111	2.59497	neg	M-H2O-H	C15H22N2O4S	-2.18313	96.4004	100 - 18.2 - 6.9 - 1.02 - 0.141	HMDB0060610	Hydroxyhexamide	Organic compounds	Benzenoids	Benzene and substituted derivatives	4889.22	5513.29	6182.4	5888.21	6659.11	7945.59	11935	8034.37	5210.96	14100.7	10635.4	6752.11	6907.32	8715.45	8622.58	9201.22	10945.5	11978.4	9513.64	11665.9	16955.5	12779	16136.5	21354.9	6179.63	9444.75	9395.07	14734.2	1.52837	1.52033	2.38432	0.99474	1.56005	1.56829
0.50_307.6539m/z	307.654	0.496983	pos	M+H+Na	C32H41N5O6	9.34693	96.842	100 - 37.1 - 7.94 - 1.24 - 0.156	HMDB0029334	Nummularine B	Organic compounds	Organic acids and derivatives	Carboxylic acids and derivatives	562.155	696.717	680.75	643.972	771.908	722.5	768.642	800.626	1043.67	987.499	1010.12	870.507	1187.01	1084.21	1257.92	1015.9	1180.41	1109.34	1630.71	1522.43	2039.06	1796.89	1541.69	2035.9	679.667	913.511	1139.13	1761.11	1.67602	1.34406	2.59114	0.801936	1.54601	1.92785
2.57_352.1097n	353.117	2.57355	pos	M+H, M+Na	C16H20N2O5S	1.26744	93.5248	100 - 19.3 - 7.3 - 1.13 - 0.166	HMDB0060617	Penicilloic acid	Organic compounds	Organic acids and derivatives	Carboxylic acids and derivatives	836.38	735.558	894.467	1304.63	1243.67	1450.21	1954.22	1528.54	983.532	2327.58	2032.85	1431.46	1402.11	1867	2214.25	1767.15	2034.68	2687.93	2462.37	3171.27	4474.89	2599.25	3218.36	5017.43	1077.49	1709.7	1995.52	3490.6	1.58675	1.85202	3.23957	1.16718	2.04165	1.74922
4.90_508.3393m/z	508.339	4.89938	neg	M-H	C25H52NO7P	-3.05008	93.553	100 - 28.3 - 5.29 - 0.742	HMDB0012108	LysoPC(17:0)	Organic compounds	Lipids and lipid-like molecules	Glycerophospholipids	177.404	670.438	657.116	165.594	605.33	714.82	1421.88	667.658	731.46	1264.76	654.657	737.337	635.173	1070.32	583.093	642.731	1071.46	600.323	1282.06	1178.27	1590.76	1311.86	1383.14	1595.95	498.45	912.959	767.184	1390.34	1.8316	1.53914	2.78933	0.840327	1.52289	1.81226
4.90_523.3646n	524.372	4.89942	pos	M+H, M+Na, M+H-H2O	C26H54NO7P	1.64332	96.377	100 - 29.4 - 5.6 - 0.801	HMDB0062195	2-acetyl-1-alkyl-sn-glycero-3-phosphocholine	Organic compounds	Lipids and lipid-like molecules	Glycerophospholipids	627.105	2324.66	2890.89	838.241	3631.34	4027.1	7473.73	3240.89	3223.22	9284.15	4553.46	4920.39	3370.61	4860.11	2645.64	4400.8	5750.98	3383.24	9870.63	8879.43	11349.6	11616.7	9452.69	12114.1	2389.89	5449.31	4068.56	10547.2	2.28015	1.70241	4.41326	0.746621	1.93551	2.59236
2.59_375.0974m/z	375.097	2.59497	neg	M+Cl	C20H20O5	-9.06246	94.4046	100 - 22.1 - 3.34 - 0.38	HMDB0129264	(2E)-3-phenyl-1-[2,3,4,6-tetrahydroxy-5-(3-methylbut-2-en-1-yl)phenyl]prop-2-en-1-one	Organic compounds	Phenylpropanoids and polyketides	Linear 1,3-diarylpropanoids	364.799	546.994	698.928	415.828	636.229	776.095	1455.27	816.024	566.996	1632.64	1008.46	681.596	748.663	954.35	891.252	912.059	1105.25	1106.99	1132.61	1325.82	1800.63	1385.32	1675.8	2158.34	573.146	1026.83	953.093	1579.75	1.79157	1.66292	2.75628	0.928189	1.53847	1.6575
2.28_192.0658m/z	192.066	2.28208	neg	M+FA-H	C9H9NO	-5.36283	98.7396	100 - 10.2 - 0.677	HMDB0030204	1-(2-Furanylmethyl)-1H-pyrrole	Organic compounds	Organoheterocyclic compounds	Pyrroles	281.192	565.923	635.875	323.014	715.09	866.21	1402.75	638.968	557.196	1599.65	841.939	722.821	807.603	1251.12	777.662	1093.85	1522.62	1039.19	1298.32	1350.98	1787.72	1762.24	1846.55	2221.13	564.551	960.555	1082.01	1711.15	1.70145	1.91658	3.031	1.12644	1.78142	1.58146
