# Supplementary material for: The combination of lactoferrin and linolenic acid inhibits colorectal tumor growth through activating AMPK/JNK-related apoptosis pathway
Source: PeerJ. 2021 May 31;9:e11072. doi: 10.7717/peerj.11072 (PMC8174148; doi:10.7717/peerj.11072)
Supplement: Supplemental Information 5 [file peerj-09-11072-s005.xlsx]

## Sheet: Fig1 cell viability
		LF	Oleic acid	DHA	Linolenic acid
	0	99.125	98.7625	99.1125	98.85		0.820714	1.00561	0.931109	0.808879
	0.01g/L	98.5	92.275	94.4375	91.275		0.911827	1.38332	1.39072	2.89766
	0.05g/L	96.05	88.8	89.8375	86.0125		1.83615	3.66216	3.80824	4.00729
	0.1g/L	91.825	81.65	82.8375	78.45		3.42585	4.80089	2.69069	2.31702
	0.5g/L	86.325	72.275	76.4875	70.825		3.8481	3.05976	3.13252	4.6432
	1g/L	80.125	67.2375	71.425	64.4875		3.76326	4.14554	4.03476	4.51804
	5g/L	69.3875	61.1875	63.4	55.5125		4.95305	4.01726	4.93964	3.60216
	0
		LF	Oleic acid	DHA	Linolenic acid
	1	98.9	98.6	99.5	98.9
	2	99.9	99.9	99.1	99.9
	3	99.4	99	99.4	98.8
	4	98	97.9	99.7	98.4
	5	97.8	96.8	99	98.6
	6	99.5	98.9	99.7	97.4
	7	99.9	99.5	96.9	98.9
	8	99.6	99.5	99.6	99.9
	AV	99.125	98.7625	99.1125	98.85
	SD	0.820714	1.00561	0.931109	0.808879
	0.01g/L
		LF	Oleic acid	DHA	Linolenic acid
	1	97.4	93.1	94.9	90.9
	2	99.3	92.7	94.3	91.2
	3	98.5	91.3	95.2	92.5
	4	98.7	90.5	95.4	90.1
	5	96.9	93.5	92	93.1
	6	99.1	94.5	92.6	96.2
	7	98.6	91.5	95.6	90.1
	8	99.5	91.1	95.5	86.1
	AV	98.5	92.275	94.4375	91.275
	SD	0.911827	1.38332	1.39072	2.89766
	0.05g/L
		LF	Oleic acid	DHA	Linolenic acid
	1	96.9	89.1	87.8	85.5
	2	95.9	88.2	88.9	87.1
	3	95	86.9	91.7	93.2
	4	97.9	94.1	94.8	90.3
	5	94.3	84.6	86.1	83.4
	6	93.1	84	95.7	82.5
	7	96.8	93.1	87.9	81.6
	8	98.5	90.4	85.8	84.5
	AV	96.05	88.8	89.8375	86.0125
	SD	1.83615	3.66216	3.80824	4.00729
	0.1g/L
		LF	Oleic acid	DHA	Linolenic acid
	1	92.4	88.8	85.6	76.5
	2	92.9	86.2	86.9	76.2
	3	90.4	85.3	85.5	76.4
	4	95.9	81.9	81.9	76.3
	5	85.4	80.4	80.3	80.7
	6	92.4	78.8	81	81.5
	7	89.5	75.5	80.6	80.6
	8	95.7	76.3	80.9	79.4
	AV	91.825	81.65	82.8375	78.45
	SD	3.42585	4.80089	2.69069	2.31702
	0.5g/L
		LF	Oleic acid	DHA	Linolenic acid
	1	89.5	70.9	75.6	67.8
	2	90.3	71.1	74.8	65.5
	3	91.2	70.5	78.9	63.2
	4	88.3	71.9	77.6	73
	5	83.5	76.4	74.2	75.3
	6	82.1	76	71.1	74.9
	7	82.6	74.1	79.1	73.2
	8	83.1	67.3	80.6	73.7
	AV	86.325	72.275	76.4875	70.825
	SD	3.8481	3.05976	3.13252	4.6432
	1g/L
		LF	Oleic acid	DHA	Linolenic acid
	1	81.2	64.5	73.3	62.9
	2	80.9	64.1	77.9	65.8
	3	82.3	63.3	75.5	70.3
	4	82.5	62.7	72.6	71.2
	5	77.6	70.3	67.8	65.4
	6	75.9	67.9	68.2	60.6
	7	74.7	72	66.6	60.5
	8	85.9	73.1	69.5	59.2
	AV	80.125	67.2375	71.425	64.4875
	SD	3.76326	4.14554	4.03476	4.51804
	5g/L
		LF	Oleic acid	DHA	Linolenic acid
	1	74.4	64.5	58.9	54.2
	2	74.1	66.2	56.4	56.3
	3	75	64.9	58.8	61.3
	4	72.1	63.2	63.4	60.7
	5	65.3	59.1	67.9	53.4
	6	63.2	58.9	69.2	52.9
	7	65.1	57.5	68.5	53.1
	8	65.9	55.2	64.1	52.2
	AV	69.3875	61.1875	63.4	55.5125
	SD	4.95305	4.01726	4.93964	3.60216

## Sheet: Fig2 apoptosis
LR
	Control	LF	Oleic acid	DHA	Linolenic acid	LF+Oleic acid	LF+DHA	LF+Linolenic acid
1	0.36	17.75	8.99	5.83	8.08	13.86	15.01	24.75
2	0.21	16.86	6.89	4.32	9.05	11.78	17.71	20.36
3	0.3	15.13	7.83	4.03	6.83	12.91	14.22	21.21
AV	0.29	16.58	7.90333	4.72667	7.98667	12.85	15.6467	22.1067
SD	0.0754983	1.33225	1.05192	0.966454	1.11294	1.0413	1.83004	2.32831

## Sheet: Fig3 4 transwell and scratch
Fig3
Transwell
	Control	LF	Oleic acid	DHA	Linolenic acid	LF+Oleic acid	LF+DHA	LF+Linolenic acid
1	236	107	132	98	84	56	93	57
2	173	81	108	111	70	73	60	39
3	211	79	93	73	65	84	81	47
AV	206.667	89	111	94	73	71	78	47.6667
SD	31.7228	15.6205	19.6723	19.3132	9.84886	14.1067	16.7033	9.0185
Fig4
Scratch analysis
	Control	LF	Oleic acid	DHA	Linolenic acid	LF+Oleic acid	LF+DHA	LF+Linolenic acid
1	79	47	65	58	49	53	39	35
2	76	39	55	46	39	51	31	31
3	70	40	59	52	47	45	33	28
AV	75	42	59.6667	52	45	49.6667	34.3333	31.3333
SD	4.58258	4.3589	5.03322	6	5.2915	4.16333	4.16333	3.51188

## Sheet: Fig5 tumors
Fig5b	RTV
			0	4	8	12	16	20	24
		Control	1	1.167	1.568	2.784	5.276	11.3649	16.368
		LF	1	1.148	1.507	2.635	4.572	8.13769	10.733
		LA	1	1.062	1.466	2.211	3.893	7.19625	9.258
		LF+LA	1	1.058	1.388	1.592	2.947	4.48471	7.167
		SD	0.0985	0.214	0.361	0.468	0.948	1.556	2.176
			0.0986	0.267	0.428	0.509	1.165	1.706	2.431
			0.1055	0.209	0.445	0.545	0.68	1.436	2.652
			0.0821	0.199	0.411	0.526	0.532	1.235	1.179
			Control	LF	LA	LF+LA
Fig5c	Tumor suppression rate		2.53	1.575	1.40667	1.17167
				0.955	1.12333	1.35833
				37.747	44.4005	53.6891
				4.2938	5.31226	6.25138
Fig5d	RTPR
		0d	4d	8d	12d	16d	24d
	Control	100	95.0678	93.0518	89.7711	84.728	81.7107
	LF	100	93.77	87.96	83.15	74.23	65.08
	LA	100	93.34	86.05	80.46	72.89	63.37
	LF+LA	100	90.08	81.21	75.26	64.11	54.77
	SD	3.13	4.99	3.67	3.25	3.33	4.33
		3.56	2.98	4.11	5.19	5.76	4.01
		2.35	3.08	4.19	4.32	5.33	2.16
		2.45	2.93	3.33	3.67	2.76	4.93

## Sheet: Fig6 metabolite
Compound	m/z	Retention time (min)	mode	Adducts	Formula	Mass Error (ppm)	Isotope Similarity	Theoretical Isotope Distribution	Compound ID	Description	kingdom	super_class	class	C1	C2	C3	C4	C5	C6	LA1	LA2	LA3	LA4	LA5	LA6	LF1	LF2	LF3	LF4	LF5	LF6	LF+LA1	LF+LA2	LF+LA3	LF+LA4	LF+LA5	LF+LA6	av C	av LA	av LF	av LF+LA	fold LA/C	fold LF/C	fold LF+LA/C	fold LF/LA	fold LF+LA/LA	fold LF+LA/LF
2.59_307.1115m/z	307.111	2.59497	neg	M-H2O-H	C15H22N2O4S	-2.18313	96.4004	100 - 18.2 - 6.9 - 1.02 - 0.141	HMDB0060610	Hydroxyhexamide	Organic compounds	Benzenoids	Benzene and substituted derivatives	4889.22	5513.29	6182.4	5888.21	6659.11	7945.59	11935	8034.37	5210.96	14100.7	10635.4	6752.11	6907.32	8715.45	8622.58	9201.22	10945.5	11978.4	9513.64	11665.9	16955.5	12779	16136.5	21354.9	6179.63	9444.75	9395.07	14734.2	1.52837	1.52033	2.38432	0.99474	1.56005	1.56829
0.50_307.6539m/z	307.654	0.496983	pos	M+H+Na	C32H41N5O6	9.34693	96.842	100 - 37.1 - 7.94 - 1.24 - 0.156	HMDB0029334	Nummularine B	Organic compounds	Organic acids and derivatives	Carboxylic acids and derivatives	562.155	696.717	680.75	643.972	771.908	722.5	768.642	800.626	1043.67	987.499	1010.12	870.507	1187.01	1084.21	1257.92	1015.9	1180.41	1109.34	1630.71	1522.43	2039.06	1796.89	1541.69	2035.9	679.667	913.511	1139.13	1761.11	1.67602	1.34406	2.59114	0.801936	1.54601	1.92785
2.57_352.1097n	353.117	2.57355	pos	M+H, M+Na	C16H20N2O5S	1.26744	93.5248	100 - 19.3 - 7.3 - 1.13 - 0.166	HMDB0060617	Penicilloic acid	Organic compounds	Organic acids and derivatives	Carboxylic acids and derivatives	836.38	735.558	894.467	1304.63	1243.67	1450.21	1954.22	1528.54	983.532	2327.58	2032.85	1431.46	1402.11	1867	2214.25	1767.15	2034.68	2687.93	2462.37	3171.27	4474.89	2599.25	3218.36	5017.43	1077.49	1709.7	1995.52	3490.6	1.58675	1.85202	3.23957	1.16718	2.04165	1.74922
4.90_508.3393m/z	508.339	4.89938	neg	M-H	C25H52NO7P	-3.05008	93.553	100 - 28.3 - 5.29 - 0.742	HMDB0012108	LysoPC(17:0)	Organic compounds	Lipids and lipid-like molecules	Glycerophospholipids	177.404	670.438	657.116	165.594	605.33	714.82	1421.88	667.658	731.46	1264.76	654.657	737.337	635.173	1070.32	583.093	642.731	1071.46	600.323	1282.06	1178.27	1590.76	1311.86	1383.14	1595.95	498.45	912.959	767.184	1390.34	1.8316	1.53914	2.78933	0.840327	1.52289	1.81226
4.90_523.3646n	524.372	4.89942	pos	M+H, M+Na, M+H-H2O	C26H54NO7P	1.64332	96.377	100 - 29.4 - 5.6 - 0.801	HMDB0062195	2-acetyl-1-alkyl-sn-glycero-3-phosphocholine	Organic compounds	Lipids and lipid-like molecules	Glycerophospholipids	627.105	2324.66	2890.89	838.241	3631.34	4027.1	7473.73	3240.89	3223.22	9284.15	4553.46	4920.39	3370.61	4860.11	2645.64	4400.8	5750.98	3383.24	9870.63	8879.43	11349.6	11616.7	9452.69	12114.1	2389.89	5449.31	4068.56	10547.2	2.28015	1.70241	4.41326	0.746621	1.93551	2.59236
2.59_375.0974m/z	375.097	2.59497	neg	M+Cl	C20H20O5	-9.06246	94.4046	100 - 22.1 - 3.34 - 0.38	HMDB0129264	(2E)-3-phenyl-1-[2,3,4,6-tetrahydroxy-5-(3-methylbut-2-en-1-yl)phenyl]prop-2-en-1-one	Organic compounds	Phenylpropanoids and polyketides	Linear 1,3-diarylpropanoids	364.799	546.994	698.928	415.828	636.229	776.095	1455.27	816.024	566.996	1632.64	1008.46	681.596	748.663	954.35	891.252	912.059	1105.25	1106.99	1132.61	1325.82	1800.63	1385.32	1675.8	2158.34	573.146	1026.83	953.093	1579.75	1.79157	1.66292	2.75628	0.928189	1.53847	1.6575
2.28_192.0658m/z	192.066	2.28208	neg	M+FA-H	C9H9NO	-5.36283	98.7396	100 - 10.2 - 0.677	HMDB0030204	1-(2-Furanylmethyl)-1H-pyrrole	Organic compounds	Organoheterocyclic compounds	Pyrroles	281.192	565.923	635.875	323.014	715.09	866.21	1402.75	638.968	557.196	1599.65	841.939	722.821	807.603	1251.12	777.662	1093.85	1522.62	1039.19	1298.32	1350.98	1787.72	1762.24	1846.55	2221.13	564.551	960.555	1082.01	1711.15	1.70145	1.91658	3.031	1.12644	1.78142	1.58146
Nummularine B
		C1	C2	C3	C4	C5	C6	LA1	LA2	LA3	LA4	LA5	LA6	LF1	LF2	LF3	LF4	LF5	LF6	LF+LA1	LF+LA2	LF+LA3	LF+LA4	LF+LA5	LF+LA6
		562.155	696.717	680.75	643.972	771.908	722.5	768.642	800.626	1043.67	987.499	1010.12	870.507	1187.01	1084.21	1257.92	1015.9	1180.41	1109.34	1630.71	1522.43	2039.06	1796.89	1541.69	2035.9
							679.667						913.511						1139.13						1761.11
							71.7192						116.042						86.2521						235.018
			control	LF	LA	LF+LA
		AV	679.667	1139.13	913.511	1761.11
		SD	71.7192	86.2521	116.042	235.018

## Sheet: Fig7 wb
Fig7a		Control	LF	LA	LF+LA
	p-AMPK	0.11	0.64	0.59	0.65
	AMPK	0.42	0.51	0.69	0.81
	p-JNK	0.3	0.36	0.49	0.84
	JNK	0.55	0.52	0.53	0.5
	Bcl-2	0.58	0.47	0.31	0.22
	Bax	0.31	0.41	0.62	0.79
	Caspase-3	0.51	0.55	0.63	0.64
	Cleaved Cas3	0.17	0.88	1.02	1.24
	SD	0.02	0.11	0.1	0.09
		0.03	0.06	0.07	0.1
		0.05	0.08	0.08	0.06
		0.06	0.09	0.07	0.07
		0.11	0.05	0.05	0.04
		0.12	0.09	0.05	0.07
		0.03	0.07	0.09	0.11
		0.04	0.13	0.11	0.17
Fig7b		Control	LF+LA	Nu	LF+LA+Nu	AMPK inhibitor	AMPK inhibitor+Nu
	p-AMPK	0.15	0.39	0.45	0.49	0.06	0.05
	AMPK	0.3	0.44	0.49	0.72	0.15	0.17
	p-JNK	0.31	0.42	0.46	0.65	0.18	0.19
	JNK	0.34	0.3	0.29	0.33	0.37	0.39
	Bcl-2	0.78	0.45	0.49	0.33	0.56	0.58
	Bax	0.35	0.49	0.45	0.62	0.27	0.3
	Caspase-3	0.74	0.73	0.76	0.79	0.71	0.77
	Cleaved Cas3	0.22	0.58	0.61	0.65	0.17	0.18
	SD	0.03	0.06	0.08	0.07	0.02	0.01
		0.02	0.04	0.07	0.11	0.02	0.04
		0.05	0.04	0.05	0.07	0.05	0.03
		0.05	0.04	0.05	0.05	0.06	0.05
		0.03	0.05	0.06	0.04	0.05	0.06
		0.01	0.06	0.05	0.06	0.04	0.03
		0.13	0.08	0.11	0.09	0.13	0.08
		0.05	0.09	0.08	0.1	0.03	0.04
