# Supplementary material for: The combination of lactoferrin and linolenic acid inhibits colorectal tumor growth through activating AMPK/JNK-related apoptosis pathway
Source: PeerJ. 2021 May 31;9:e11072. doi: 10.7717/peerj.11072 (PMC8174148; doi:10.7717/peerj.11072)
Supplement: Supplemental Information 7 [file peerj-09-11072-s007.xlsx]

## Sheet: Sheet1
Compound	m/z	Retention time (min)	mode	Adducts	Formula	Mass Error (ppm)	Isotope Similarity	Theoretical Isotope Distribution	Compound ID	Description	kingdom	super_class	class	C1	C2	C3	C4	C5	C6	LA1	LA2	LA3	LA4	LA5	LA6	LF1	LF2	LF3	LF4	LF5	LF6	LF+LA1	LF+LA2	LF+LA3	LF+LA4	LF+LA5	LF+LA6	sig	vip	dif1	dif2	dif
0.82_607.0806n	606.073	0.817	neg	M-H, M+Na-2H	C17H27N3O17P2	-1.61733	96.2326	100 - 20.4 - 5.48 - 0.835 - 0.132	HMDB0013112	UDP-N-acetyl-D-mannosamine	Organic compounds	Nucleosides, nucleotides, and analogues	Pyrimidine nucleotides	65322.8	120663	126198	71128.9	159448	176590	184334	135043	150521	252736	221524	232581	123084	171045	106830	194845	254449	160410	172658	162324	141931	254507	254563	209592	0.0360043	10.006	s	s	s
7.68_755.5477n	756.555	7.68103	pos	M+H, M+K, M+Na	C42H78NO8P	1.52329	96.2682	100 - 47 - 12.4 - 2.39 - 0.366	HMDB0008199	PC(18:3(9Z,12Z,15Z)/16:0)	Organic compounds	Lipids and lipid-like molecules	Glycerophospholipids	85.4081	296.02	170.97	6.34189	61.8135	47.3202	30962.7	15448.8	49015.5	32912.5	20243.8	56564.1	1093.33	413.888	0	873.577	444.339	16.817	40697	24672.6	19394.5	47885	23787.8	23740.6	2.05344e-06	4.62288	s	s	s
2.59_307.1115m/z	307.111	2.59497	neg	M-H2O-H	C15H22N2O4S	-2.18313	96.4004	100 - 18.2 - 6.9 - 1.02 - 0.141	HMDB0060610	Hydroxyhexamide	Organic compounds	Benzenoids	Benzene and substituted derivatives	4889.22	5513.29	6182.4	5888.21	6659.11	7945.59	11935	8034.37	5210.96	14100.7	10635.4	6752.11	6907.32	8715.45	8622.58	9201.22	10945.5	11978.4	9513.64	11665.9	16955.5	12779	16136.5	21354.9	0.00060582	4.49593	s	s	s
4.90_523.3646n	524.372	4.89942	pos	M+H, M+Na, M+H-H2O	C26H54NO7P	1.64332	96.377	100 - 29.4 - 5.6 - 0.801	HMDB0062195	2-acetyl-1-alkyl-sn-glycero-3-phosphocholine	Organic compounds	Lipids and lipid-like molecules	Glycerophospholipids	627.105	2324.66	2890.89	838.241	3631.34	4027.1	7473.73	3240.89	3223.22	9284.15	4553.46	4920.39	3370.61	4860.11	2645.64	4400.8	5750.98	3383.24	9870.63	8879.43	11349.6	11616.7	9452.69	12114.1	3.06486e-07	4.37269	s	s	s
6.12_390.2778n	413.267	6.11595	pos	M+Na, 2M+Na, M+K, M+H	C24H38O4	2.06315	94.8262	100 - 26.5 - 4.21 - 0.493	HMDB0041454	D8'-Merulinic acid A	Organic compounds	Benzenoids	Benzene and substituted derivatives	1886.04	6446.3	5093.33	4107.59	11526.2	11623.4	14175.2	9359.37	13332.1	18222.6	12780.5	17750.1	10080.7	12118.6	9207.39	10714.2	15809.5	8210.64	15316.9	14850.1	14648.3	19444.5	14825.8	16832.9	0.000241553	3.96919	s	s	s
4.47_495.3319n	540.33	4.47293	neg	M+FA-H, 2M+FA-H, M+Cl	C24H50NO7P	-1.2696	99.1099	100 - 27.2 - 4.99 - 0.687	HMDB0240262	LysoPC(0:0/16:0)	Organic compounds	Lipids and lipid-like molecules	Glycerophospholipids	4988.68	11290.6	11033.5	5612.21	12131.2	12656.2	15070.6	10611.7	10768.1	16538.8	12476.7	11928.3	11115.9	14131.1	10360.4	12778.3	15299.3	12657.5	13657.2	13974.6	17269.2	15534.5	16744.9	19058.6	0.00277235	3.77293	s	s	s
6.81_753.5320n	754.539	6.81313	pos	M+H, M+K, M+Na	C42H76NO8P	1.52471	95.8819	100 - 47 - 12.4 - 2.38 - 0.366	HMDB0008459	PC(20:4(8Z,11Z,14Z,17Z)/14:0)				338.623	749.015	490.571	136.913	561.111	544.103	12562.7	5570.13	13902.9	12819.7	7354.66	16325.4	3202.47	1036.69	261.401	3980.72	1258.6	358.198	16687.2	8499.7	8566.12	17452.7	10293.1	10432.9	4.64623e-07	3.57939	s	s	s
2.24_835.4503m/z	835.45	2.23923	neg	M-H2O-H	C44H70O16	2.02257	82.8464	100 - 49 - 15 - 3.45 - 0.647 - 0.104	HMDB0041548	Hovenidulcioside B1	Organic compounds	Lipids and lipid-like molecules	Prenol lipids	10700.9	2667.37	1891.22	12249.2	2808.71	2066.06	442.348	2025.62	2248.76	327.526	2085.74	2580.6	1726.25	1364.52	1942.94	1781.24	1152.27	2112.27	345.907	448.165	197.361	244.532	404.189	196.265	0.0104808	3.16161	s	s	s
0.63_307.0829n	306.076	0.632	neg	M-H, M+Na-2H, M+Cl, M-H2O-H	C10H17N3O6S	-2.79471	97.8903	100 - 13.1 - 6.55 - 0.749 - 0.125	HMDB0062697	Glutathionate(1-)	Organic compounds	Organic acids and derivatives	Carboxylic acids and derivatives	3053.94	6392.86	5872	3303.25	7943.92	7687.93	11116	7809.46	11555.1	11509.9	11571.8	15757.4	8672.05	10190.9	7207.17	11048.7	16305.2	9237.18	11256.5	10036.1	9191.4	14794.1	13095.7	10262	0.00176943	3.09166	s	s	s
6.78_727.5167n	728.524	6.77742	pos	M+H, M+K, M+Na	C40H74NO8P	2.01048	94.8879	100 - 44.8 - 11.4 - 2.13 - 0.318	HMDB0008196	PC(18:3(9Z,12Z,15Z)/14:0)				160.728	199.275	132.887	50.0961	45.2667	64.7273	10774	5075.94	11942.9	11307	6411.53	13459.2	748.065	391.275	71.2189	630.331	374.252	40.3171	13304.9	6998.47	7237.1	14020	8443.74	8393.11	3.67267e-08	2.98731	s	s	s
2.39_1083.5415m/z	1083.54	2.38853	neg	M-H	C54H84O22	3.1329	63.524	100 - 60.2 - 22.3 - 6.17 - 1.39 - 0.269	HMDB0034545	AzIV	Organic compounds	Lipids and lipid-like molecules	Prenol lipids	4652.31	3986.23	2180.37	4938.3	4191.66	2383.82	659.582	2797.07	2670.79	452.825	3020.43	2824.03	1786.31	1956.24	2510.47	2181.34	2058.5	2779.34	319.675	527.559	221.074	271.852	355.619	166.808	1.47418e-05	2.97093	s	s	s
4.90_568.3609m/z	568.361	4.89938	neg	M+FA-H	C26H54NO7P	-2.12813	95.6396	100 - 29.4 - 5.6 - 0.801	HMDB0011128	LysoPC(0:0/18:0)	Organic compounds	Lipids and lipid-like molecules	Glycerophospholipids	692.626	2703.63	2923.9	722.681	2713.8	3116.95	5779.11	2752.71	2990.52	5961.79	3050.88	3238.94	2588.39	4336.71	2391.34	2773.17	4506.78	2627.92	5402.42	5237.07	6732.71	5920.13	6152.93	7086.08	4.60434e-05	2.93299	s	s	s
2.52_995.4689m/z	995.469	2.52425	neg	M-H	C43H83O19P3	2.04087	30.0197	100 - 48.2 - 15.3 - 3.63 - 0.712 - 0.12	HMDB0010085	PIP2(18:1(9Z)/16:0)	Organic compounds	Lipids and lipid-like molecules	Glycerophospholipids	3914.47	3193.44	2572.34	4323.08	3374	2552.36	303.146	2453.59	2674.1	259.36	2487.16	2687.05	1985.07	749.088	2112.83	2191.29	764.188	2221.14	209.555	258.569	145.304	175.621	195.532	130.268	1.3881e-05	2.89366	s	s	s
0.80_307.0824n	306.076	0.802717	neg	M-H2O-H, M-H	C10H17N3O6S	-4.62333	96.6711	100 - 13.1 - 6.55 - 0.749 - 0.125	HMDB0000125	Glutathione	Organic compounds	Organic acids and derivatives	Carboxylic acids and derivatives	3486.58	7073.1	6540.57	4023.3	9761.26	9460.46	10782.7	7675.89	10317.8	16503.5	13858.9	15056.4	7838.02	12625.1	7795.67	12808.6	19752.7	11899.4	11052.6	9996.69	9382.06	15379.4	14544.7	13194.5	0.0180836	2.87659	s	s	s
2.96_526.1644m/z	526.164	2.95785	neg	M+FA-H	C22H28FN3O6S	-4.29392	98.1654	100 - 26.2 - 9.06 - 1.74 - 0.28	HMDB0015230	Rosuvastatin	Organic compounds	Organoheterocyclic compounds	Diazines	4952.37	4247.74	4491.8	5925.91	4896.46	4990.62	7378.39	5787.18	4098.39	7887.06	6679.16	4122.3	4854.17	6261.54	6164.79	6135.15	6851.83	7721.07	5931.58	7143.25	10884.6	7220.37	7903.96	12443.6	0.00582154	2.84261	s	s	s
2.57_536.2537m/z	536.254	2.57353	neg	M-H2O-H	C28H37N5O7	4.01636	93.7955	100 - 32.8 - 6.65 - 1.01 - 0.123	HMDB0001045	Enkephalin L	Organic compounds	Organic acids and derivatives	Carboxylic acids and derivatives	6191.14	5816.7	3065.63	8082.51	6096.99	2960.47	1335.55	3801.07	3880.36	1312.14	3744.42	4122.04	3744.64	2902.42	3767.89	4130.08	2953.65	4698.47	1400.51	1957.63	1579.97	1391.52	1987.57	1666.05	0.000548915	2.76557	s	s	s
4.41_545.3465n	590.345	4.40865	neg	M+Cl, M+FA-H	C28H52NO7P	-2.92142	95.8044	100 - 31.5 - 6.24 - 0.924 - 0.111	HMDB0010394	LysoPC(20:3(8Z,11Z,14Z))	Organic compounds	Lipids and lipid-like molecules	Glycerophospholipids	15.8537	38.2416	78.4467	14.6868	43.7779	49.6413	3999.84	3352.69	3236.51	4108.06	3865.67	3438.06	70.289	85.7732	103.575	28.5274	40.9609	89.3841	4255.26	4679.83	5771.22	4324.6	5214.7	5903.99	8.40617e-16	2.65521	s	s	s
3.58_317.2940n	318.301	3.58362	pos	M+H, M+Na	C18H39NO3	3.26907	98.0545	100 - 20.4 - 2.59 - 0.246	HMDB0004610	Phytosphingosine	Organic compounds	Organic nitrogen compounds	Organonitrogen compounds	2313.12	3610.64	4487.25	3632.98	6536.95	7077.35	6322.9	4656.64	5559.34	7664.62	6554.5	7570.71	6288.46	8100.32	6780.57	7704.16	8902.75	6665.22	7455.77	6805.6	7341.37	7803.26	7500.04	7908.39	0.00178987	2.62598	s	s	s
2.57_352.1097n	353.117	2.57355	pos	M+H, M+Na	C16H20N2O5S	1.26744	93.5248	100 - 19.3 - 7.3 - 1.13 - 0.166	HMDB0060617	Penicilloic acid	Organic compounds	Organic acids and derivatives	Carboxylic acids and derivatives	836.38	735.558	894.467	1304.63	1243.67	1450.21	1954.22	1528.54	983.532	2327.58	2032.85	1431.46	1402.11	1867	2214.25	1767.15	2034.68	2687.93	2462.37	3171.27	4474.89	2599.25	3218.36	5017.43	1.59086e-05	2.56263	s	s	s
2.58_711.4397m/z	711.44	2.58068	neg	M+FA-H	C34H67O10P	-8.55667	90.6132	100 - 37.9 - 9.05 - 1.61 - 0.235	HMDB0116695	PG(i-14:0/i-14:0)	Organic compounds	Lipids and lipid-like molecules	Glycerophospholipids	2835.3	2485.67	1833.56	4176.3	2498.84	1556.8	100.847	1952.27	3241.91	82.7475	1930.67	3454.32	1402.87	404.471	1023.1	1664.45	462.691	1241.45	153.053	227.82	112.65	184.878	190.464	133.935	0.00121791	2.50085	s	s	s
2.31_686.3708m/z	686.371	2.31067	neg	M-H2O-H	C34H59NO14	-6.99601	89.7665	100 - 38.4 - 10 - 1.97 - 0.32	HMDB0040967	Fumonisin B3	Organic compounds	Organic acids and derivatives	Carboxylic acids and derivatives	3078.29	2401.08	1954.27	3222.94	2643.43	2228.74	370.827	1537.02	1527.57	336.914	1589.02	1654.35	1400.42	703.555	1482.88	1588.43	588.719	1691.89	253.171	343.858	241.427	285.722	374.367	220.098	6.00855e-07	2.46883	s	s	s
2.31_292.1403n	607.327	2.31067	pos	M+NH4, 2M+Na	C15H20N2O4	-6.94598	29.9434	100 - 17.3 - 2.24 - 0.214	HMDB0011687	Phenylbutyrylglutamine	Organic compounds	Organic acids and derivatives	Carboxylic acids and derivatives	3045.17	2676.73	2224.73	3241.26	2411.14	1421.12	739.991	2314.52	2057.04	387.849	1517.72	1154.98	1698.26	987.738	752.243	758.152	668.454	1343.86	464.596	512.709	344.098	253.247	381.516	253.802	1.2574e-05	2.45912	s	s	s
2.40_1027.5596m/z	1027.56	2.40282	neg	M-H	C58H80N2O14+2	5.78803	68.1215	100 - 64.9 - 23.6 - 6.21 - 1.3 - 0.231	HMDB0015357	Mivacurium	Organic compounds	Organoheterocyclic compounds	Isoquinolines and derivatives	4481.31	2624.05	1405.64	5110.83	2981.32	1536.37	315.218	1795.5	1461.19	270.921	1937.87	1703.56	1019.13	1492.3	2504	1420.73	1793.37	3107.08	166.115	296.26	120.539	178.572	256.12	149.084	0.000368721	2.41329	s	s	s
2.38_548.2642n	547.257	2.38138	neg	M-H, M+FA-H	C32H38NO7+	-1.06631	86.2717	100 - 35.7 - 7.62 - 1.2 - 0.154	HMDB0060616	Tamoxifen-N-glucuronide	Organic compounds	Phenylpropanoids and polyketides	Stilbenes	8575.28	2001.58	1563.61	8554.5	2077.04	1634.88	462.352	1682.3	2617.89	296.31	1735.19	2441.74	1486.41	4738.79	2264.55	1864.21	3942.46	2289.76	551.251	742.326	543.536	343.527	512.761	467.139	0.0260776	2.2945	s	s	s
0.57_280.0929m/z	280.093	0.567717	pos	M+Na	C8H20NO6P	3.34352	97.3594	100 - 9.48 - 1.63 - 0.126	HMDB0000086	Glycerophosphocholine	Organic compounds	Lipids and lipid-like molecules	Glycerophospholipids	671.302	1082.89	1358.94	1015.87	1629.94	2182.3	4505.42	2979.3	3944.89	5293.38	4145.25	5365.03	1998.01	2042.98	2504.12	1990.23	2382.58	1729.16	5097.49	4672.53	4630.05	5514.69	4304.54	4707.22	1.32601e-09	2.27024	s	s	s
0.57_214.0477m/z	214.048	0.57485	neg	M+Cl	C6H13NO5	-5.99986	92.2124	100 - 7.19 - 1.25	HMDB0030091	beta-D-Glucosamine	Organic compounds	Organooxygen compounds	Carbohydrates and carbohydrate conjugates	368.267	852.52	827.384	430.763	1051.64	1259.26	4106.36	2142.7	3503.83	4174.71	4181.35	5454.33	1198.33	1131.28	1038.33	1819.86	2409.99	1254.51	4156.54	3624.02	3611.75	5898.7	4898.89	4354.23	6.28823e-08	2.27019	s	s	s
2.24_1118.5380m/z	1118.54	2.23923	neg	M-H	C50H73N17O11S	5.0343	34.3255	100 - 62.3 - 25.9 - 8.04 - 1.99 - 0.411	HMDB0013020	Neuromedin C	Organic compounds	Organic Polymers	Polypeptides	2855.9	1870.16	953.266	2792.34	1904.22	864.191	135.878	1273.07	1286.45	117.588	1109.86	1238.7	577.401	396.082	891.507	517.394	254.625	574.208	62.5199	46.364	32.0283	40.0637	36.8041	14.9512	6.12075e-05	2.262	s	s	s
0.53_272.9583m/z	272.958	0.532	neg	M-H	C5H11AsO8	-5.02328	62.9378	100 - 5.84 - 1.79	HMDB0012285	Ribose-1-arsenate	Organic compounds	Organic oxygen compounds	Organooxygen compounds	3701.39	7256.04	7320.2	4233.59	8409.68	9579.42	9016.29	7034.92	8629.43	10648.1	8909.7	10860.5	9243.86	11287.8	7549.4	11558.9	15124.7	8320.34	8978.14	8465.81	8337.57	11520	11338.6	8940.31	0.0308876	2.25875	s	s	s
2.45_929.4728m/z	929.473	2.44567	neg	M+FA-H	C45H72O17	-2.6634	37.3122	100 - 50.1 - 15.8 - 3.72 - 0.718 - 0.119	HMDB0040497	Melongoside H	Organic compounds	Lipids and lipid-like molecules	Steroids and steroid derivatives	2330.95	1925.54	1458.9	2499.48	1748.32	1448.9	184.015	1484.13	1667.56	55.6326	1498.12	1571.98	1068.03	498.759	1195.42	1190.87	423.943	1214.93	99.3711	116.965	13.4212	37.2088	77.0504	10.9972	1.98355e-05	2.23499	s	s	s
2.42_520.2380m/z	520.238	2.42423	neg	M-H2O-H	C30H37NO8	7.1923	72.7885	100 - 33.5 - 7.09 - 1.12 - 0.145	HMDB0062413	5,9,11-trihydroxyprosta-6E,14Z-dien-1-oate	Organic compounds	Lipids and lipid-like molecules	Prenol lipids	2873.42	1975.71	1480.78	3233.99	2090.96	1589.67	187.687	1339.15	1370.4	101.425	1409.1	1415.63	1137.06	826.698	1390.76	1338.44	684.754	1390.79	237.619	336.278	244.444	165.551	244.52	154.964	1.60341e-05	2.20726	s	s	s
2.34_871.4596m/z	871.46	2.33923	neg	M+Cl	C45H72O14	-2.38262	60.1355	100 - 50 - 15.1 - 3.4 - 0.62	HMDB0035727	Hebevinoside II	Organic compounds	Lipids and lipid-like molecules	Steroids and steroid derivatives	2160.16	2052.72	1529.67	2262.1	2016.32	1402.56	402.043	1749.81	1684.65	270.354	1704.09	1607.44	1230.79	902.486	1148.15	1304.02	714.157	953.298	184.553	270.329	206.668	171.301	197.845	167.123	7.31448e-06	2.19869	s	s	s
2.60_463.2546m/z	463.255	2.60212	neg	2M+FA-H	C9H15N5O	2.64484	89.449	100 - 11.8 - 0.842	HMDB0014494	Minoxidil	Organic compounds	Organic nitrogen compounds	Organonitrogen compounds	1894.68	1766.68	1782.77	2540.3	1870.61	1694.84	51.919	1523.7	1599.71	31.1485	1539.95	1770.95	1466.89	370.5	1041.35	1537.39	404.992	1251.06	57.8382	66.1141	56.1663	49.6342	63.3342	20.0724	4.25042e-05	2.18924	s	s	s
2.40_934.5337m/z	934.534	2.39567	neg	M+Na-2H	C51H79NO13	4.21702	93.057	100 - 56.9 - 18.6 - 4.43 - 0.848 - 0.137	HMDB0127616	(1R,12S,16Z,24E,26E,28Z,32S)-1,18-dihydroxy-12-[1-(4-hydroxy-3-methoxycyclohexyl)propan-2-yl]-19,30-dimethoxy-15,17,21,23,29,35-hexamethyl-11,36-dioxa-4-azatricyclo[30.3.1.0鈦?鈦筣hexatriaconta-16,24,26,28-tetraene-2,3,10,14,20-pentone	Organic compounds	Phenylpropanoids and polyketides	Macrolide lactams	3585.04	1366.62	1106.04	4038.52	1418.68	1048.91	89.7462	790.423	1071.9	31.9907	889.493	1112.06	564.658	380.324	710.437	830.434	353.57	802.002	49.1531	99.8898	33.7958	13.829	19.9651	8.13946	0.00063264	2.1845	s	s	s
2.33_461.2310n	460.224	2.33208	neg	M-H, M+Cl	C28H29F2N3O	6.76956	87.2954	100 - 31.8 - 5.08 - 0.547	HMDB0015232	Pimozide	Organic compounds	Benzenoids	Benzene and substituted derivatives	7356.47	7241.04	7241.78	8152.08	8360.12	8764.32	4298.26	7905.29	5635.68	4839.42	9240.93	6690.86	7162.68	6170.78	8754.76	8927.29	6658.76	10534.6	3644.98	4923.78	3811.9	4148.41	5989.57	4166.97	0.000640376	2.17392	s	s	s
2.50_202.0996n	605.311	2.49567	neg	2M-H, 3M-H	C13H14O2	0.888997	35.0327	100 - 14.3 - 1.36	HMDB0030816	6-Acetyl-2,2-dimethyl-2H-1-benzopyran	Organic compounds	Organoheterocyclic compounds	Benzopyrans	2817.64	2037.68	1532.75	3226.6	2154.75	1461.41	254.868	1477.61	2595.88	112.653	1438.36	2505.95	1323.58	1021.41	1603.87	1703.95	878.129	1583.53	293.558	344.999	148.25	183.425	166.649	114.727	0.000469665	2.17091	s	s	s
2.09_357.2132m/z	357.213	2.08993	neg	M+Cl	C22H30N2	8.91167	96.942	100 - 24.9 - 2.96 - 0.225	HMDB0015498	Aprindine	Organic compounds	Benzenoids	Indanes	5391.57	4374.33	5403.05	6637.5	4852.25	6471.95	1074.59	3584.64	2504.23	1068.76	4475.83	3271.69	4738.08	2435.76	6329.4	6075.64	2542.38	8380.06	1299.2	2155.08	1134.11	1403.65	2720.69	1167.89	0.00033291	2.17042	s	s	s
2.34_1005.5618m/z	1005.56	2.33923	neg	2M+FA-H	C23H45O8P	-7.10564	69.6287	100 - 25.7 - 4.81 - 0.671	HMDB0115685	PA(8:0/i-12:0)	Organic compounds	Lipids and lipid-like molecules	Glycerophospholipids	1963.49	1758.49	1329.13	1917.23	1857.44	1341.26	106.847	1016.36	1410.02	75.0204	1051.8	1491.59	739.146	443.658	777.766	959.638	453.155	869.938	52.1725	64.2544	29.7784	16.1802	42.2339	10.3751	1.78857e-06	2.16542	s	s	s
2.45_329.1703n	703.342	2.44567	neg	2M-H, 2M+FA-H, M+Cl	C19H25N2OS+	4.58604	39.9804	100 - 22.4 - 7.12 - 1.18 - 0.143	HMDB0240229	Hydroxyethylpromethazine	Organic compounds	Organoheterocyclic compounds	Benzothiazines	2343.73	2002.81	1664.44	2566.28	2052.49	1583.32	191.925	1575.32	1812.45	44.2395	1618.39	1841.77	1228.96	903.821	1486.91	1743.26	898.027	1705.59	188.89	251.985	111.211	112.814	151.219	123.182	2.74591e-05	2.11904	s	s	s
2.39_911.4604m/z	911.46	2.38853	neg	M+Cl	C47H72O15	4.41524	34.8478	100 - 52.2 - 16.4 - 3.84 - 0.73 - 0.118	HMDB0040133	Pectenotoxin 2 secoacid	Organic compounds	Organic oxygen compounds	Organooxygen compounds	2086.63	1770.84	1316.49	2153.93	1820.42	1323.18	228.028	1509.33	1480.16	169.168	1369.45	1417.01	1086.24	799.774	1176.62	1118.91	668.461	1108.02	148.973	217.485	119.345	67.8128	126.348	70.8577	7.22958e-06	2.0896	s	s	s
2.41_779.5186m/z	779.519	2.40997	pos	M+H-H2O	C44H77O10P	-4.42555	60.2857	100 - 48.9 - 13.7 - 2.82 - 0.466	HMDB0010583	PG(16:0/22:5(7Z,10Z,13Z,16Z,19Z))	Organic compounds	Lipids and lipid-like molecules	Glycerophospholipids	747.959	1376.11	1473.64	1127.36	2710.14	2346.86	2874.28	2176.7	2992.55	3082.02	3119.5	3293.78	3131.88	3622.32	2991.42	3507.98	4131.78	3103.12	2979.85	3727.72	3082.85	2705.26	3573.16	3130.48	2.70536e-05	1.96877	s	s	s
2.37_949.4615m/z	949.462	2.37423	neg	M+Cl	C43H80O16P2	-0.0483455	91.7441	100 - 48 - 14.6 - 3.31 - 0.615	HMDB0009983	PIP(18:2(9Z,12Z)/16:0)	Organic compounds	Lipids and lipid-like molecules	Glycerophospholipids	1924.13	1692.15	1142.33	1934.54	1715.13	1270.37	436.517	1385.32	1292.37	300.557	1488.33	1341.74	930.664	868.036	1101.51	1099.14	764.58	1160.97	192.259	301.418	153.202	215.102	257.359	122.386	4.20292e-06	1.96779	s	s	s
4.47_480.3082m/z	480.308	4.47293	neg	M-H	C23H48NO7P	-2.89434	95.6101	100 - 26.1 - 4.7 - 0.635	HMDB0010381	LysoPC(15:0)	Organic compounds	Lipids and lipid-like molecules	Glycerophospholipids	1402.18	3205.28	2878.54	1462.78	3276.72	3365.58	3991.29	2956.76	2898.81	4268.61	3160.47	2924.94	2948.78	3976.71	2810.21	3515.6	4012.46	3520.06	3691.4	3765.58	4643.12	4122.5	4347.09	4937.87	0.00313172	1.96085	s	s	s
2.26_656.3669m/z	656.367	2.26067	neg	3M-H	C13H17NO2	-5.54669	64.8038	100 - 14.7 - 1.41 - 0.102	HMDB0042008	Ritalinic acid	Organic compounds	Organic nitrogen compounds	Organonitrogen compounds	2696.4	2187.24	1858.61	2854.48	2379	2392.49	322.089	1991.7	1662.95	336.812	2266.35	2084.42	2109.81	1110.78	2464.43	2636.38	1078.16	2922.84	315.875	483.484	289.073	277.498	520.887	244.451	8.12885e-05	1.94923	s	s	s
2.26_874.4613m/z	874.461	2.26067	neg	M+Na-2H	C48H72NO10P	-3.21172	79.1139	100 - 53.5 - 16.1 - 3.5 - 0.609	HMDB0112873	PS(22:6(4Z,7Z,10Z,13Z,16Z,19Z)/20:5(5Z,8Z,11Z,14Z,17Z))	Organic compounds	Lipids and lipid-like molecules	Glycerophospholipids	1669.53	1640.31	695.564	1737.31	1731.91	831.51	134.582	905.512	875.584	96.5529	901.938	993.96	587.748	415.308	637.328	634.279	291.069	592.493	61.3643	134.311	15.7311	18.8628	47.863	17.3313	9.98722e-06	1.93201	s	s	s
2.09_850.3941m/z	850.394	2.08993	neg	M-H2O-H	C38H69N3O15P2	-9.77059	93.6604	100 - 43.6 - 12.3 - 2.62 - 0.459	HMDB0116176	CDP-DG(i-13:0/i-13:0)	Organic compounds	Lipids and lipid-like molecules	Glycerophospholipids	7045.87	4319.49	4372.72	7959.99	4576.96	5219.83	2494.41	4492.3	3072.13	2459.88	5650.04	3829.76	3847.7	3802.73	5539.93	5029.66	4077.8	7123.81	2268.32	3385.75	2466.82	2433.58	4184.53	2766.44	0.0059512	1.92156	s	s	s
2.40_331.2095n	330.202	2.40282	neg	M-H, 2M-H	C15H29N3O5	-3.70553	77.6318	100 - 17.8 - 2.53 - 0.262	HMDB0014924	Marimastat	Organic compounds	Organic oxygen compounds	Organooxygen compounds	2554.87	2623.19	2832.74	2858.13	2912.19	2914.12	808.863	2425.99	2072.42	538.738	2803.75	2176.5	2286.18	1408.07	2744.33	3134.51	1250.44	3198.51	772.644	927.532	770.616	764.382	794.463	840.575	0.000184967	1.91199	s	s	s
2.38_560.2972m/z	560.297	2.3814	pos	2M+NH4	C14H22ClNO2	-8.1001	44.9541	100 - 15.8 - 33.5 - 5.18 - 0.513	HMDB0015697	Bupranolol	Organic compounds	Benzenoids	Phenol ethers	1560.87	1275.68	1140.15	1752.6	1385.25	843.784	179.373	1032.89	1048.91	123.896	957.754	664.177	768.299	318.87	296.303	410.61	197.912	723.321	111.206	148.348	59.6333	64.8409	76.0263	55.8682	4.1953e-06	1.90237	s	s	s
2.67_681.3276m/z	681.328	2.67353	neg	M+Cl	C32H54O13	2.6454	88.7508	100 - 35.7 - 8.87 - 1.65 - 0.255	HMDB0038541	Goshonoside F5	Organic compounds	Lipids and lipid-like molecules	Prenol lipids	641.733	1850.81	1801.57	881.531	1896.45	1586.85	8.23734	1068.27	908.901	4.98594	1052.3	758.289	931.623	55.0528	642.498	932.75	55.6396	651.794	15.245	19.8589	24.3865	3.83376	14.6756	12.1876	0.000110885	1.87709	s	s	s
2.21_801.4524m/z	801.452	2.21067	neg	M+Cl	C42H70O12	-4.87116	74.288	100 - 46.7 - 13.1 - 2.73 - 0.462	HMDB0039701	Ginsenoside Rg6	Organic compounds	Lipids and lipid-like molecules	Prenol lipids	2198.65	1171.78	742.6	2216.61	1244.22	832.363	89.2799	943.586	760.979	66.2881	964.96	948.528	599.903	618.816	910.805	585.021	437.734	964.697	17.9856	63.1228	17.5046	10.0895	35.5803	5.69943	0.000128725	1.84024	s	s	s
2.65_333.0902m/z	333.09	2.65212	neg	M+Cl	C18H18O4	1.11057	94.5383	100 - 19.8 - 2.68 - 0.272	HMDB0004808	7C-aglycone	Organic compounds	Lipids and lipid-like molecules	Prenol lipids	1001.16	1071.53	1153.77	1297.66	1253.74	1238.67	2184.92	1598.15	966.762	2341.16	1755.62	1081.9	1366.04	1690.8	1672.17	1474.5	1856.2	2069.11	1816.23	2213.61	3422.97	1930.43	2561.17	3761.33	0.000791783	1.83874	s	s	s
2.41_212.1050n	635.304	2.40995	neg	2M+FA-H, 3M-H	C11H16O4	0.764839	62.3186	100 - 12.2 - 1.51 - 0.123	HMDB0059744	3,4-Methyleneazelaic acid	Organic compounds	Lipids and lipid-like molecules	Fatty Acyls	1489.24	1451.17	1396.29	1570.21	1535.79	1435.35	180.958	1286.58	1428.47	100.869	1422.39	1309.96	1005.78	513.488	1224.14	1419.72	532.866	1359.24	151.119	186.382	71.0405	95.7096	92.8439	61.2814	4.41573e-05	1.80731	s	s	s
2.27_617.3013m/z	617.301	2.2678	neg	M+FA-H	C32H44O9	8.00882	33.2779	100 - 35.5 - 7.95 - 1.33 - 0.182	HMDB0035987	Ganoderic acid H	Organic compounds	Lipids and lipid-like molecules	Prenol lipids	1533.07	1312.62	1126.94	1628.26	1383.29	1165.7	105.124	1072.02	1132.06	42.5537	1083.91	1228.1	880.094	397.803	922.307	1065.36	292.19	989.286	91.3384	172.026	70.4933	81.6051	86.4657	28.6776	3.14703e-05	1.80039	s	s	s
3.05_418.0675m/z	418.068	3.05	neg	M-H2O-H	C16H23NO9S2	9.05527	90.6381	100 - 19.9 - 12.8 - 2.2 - 0.624	HMDB0038422	3-Phenylpropyl glucosinolate	Organic compounds	Organic oxygen compounds	Organooxygen compounds	1050.62	1044.91	1090.29	1108.46	1149.93	1138.16	2162.38	1429.78	762.79	1951.61	1713.97	766.187	1565.22	1873.54	1595.22	1573.68	1882.34	1666.61	1872.84	2258.18	3190.94	1806.75	1877.44	3361.82	0.000924352	1.79564	s	s	s
1.21_232.1550m/z	232.155	1.2149	pos	M+H	C11H21NO4	2.84309	72.5738	100 - 12.7 - 1.56 - 0.13	HMDB0002013	Butyrylcarnitine	Organic compounds	Lipids and lipid-like molecules	Fatty Acyls	1066.91	1571.54	1892.38	1496.72	2283.68	2630.08	2811.47	2096.25	2435.61	3180.18	2655.12	3070.52	2423.38	2508.77	2786.82	2768.37	2632.21	2855.65	3387.81	3205	2851.23	3542.93	3258.25	2786.44	7.77988e-05	1.79557	s	s	s
2.74_829.4867n	850.419	2.73712	neg	M-H, M+Na-2H	C46H72NO10P	-3.21042	87.1313	100 - 51.3 - 15 - 3.17 - 0.539	HMDB0116771	PS(20:4(8Z,11Z,14Z,17Z)/20:5(5Z,8Z,11Z,14Z,17Z))	Organic compounds	Lipids and lipid-like molecules	Glycerophospholipids	1752.46	1014.24	1010.35	2057.14	1080.01	960.704	17.4652	989.856	1261.76	3.08319	1198.28	1065.49	962.868	305.583	947.592	940.182	252.657	926.548	8.21599	53.3314	0	6.19685	7.8221	6.36487	0.000317394	1.77936	s	s	s
4.91_377.1419m/z	377.142	4.91367	neg	M-H2O-H	C23H24O6	6.08539	88.1178	100 - 25.4 - 4.32 - 0.552	HMDB0033328	BR-Xanthone A	Organic compounds	Organoheterocyclic compounds	Benzopyrans	97.6452	101.187	116.783	103.193	104.453	109.482	2555.92	1843.36	1890.38	2264.71	1560.17	1992.16	466.176	207.102	134.716	515.516	203.993	113.001	2439.19	2285.46	2768.59	1956.02	2726.32	2244.95	1.91248e-13	1.77115	s	s	s
2.31_1120.5694n	1141.58	2.31067	neg	M-H2O-H, M+Na-2H	C54H88O24	2.51155	66.8283	100 - 60.3 - 22.8 - 6.45 - 1.49 - 0.297	HMDB0036478	Araliasaponin IV	Organic compounds	Lipids and lipid-like molecules	Prenol lipids	1593.67	1252.16	586.329	1496.61	1154.07	532.796	70.6679	746.372	700.645	63.2264	705.473	598.107	368.265	326.48	368.668	251.118	229.964	252.825	8.22177	16.5949	24.7621	35.7721	11.7355	11.9197	1.37299e-05	1.76654	s	s	s
4.84_530.3500m/z	530.35	4.83585	pos	M+NH4	C31H44O6	4.71141	98.593	100 - 34.3 - 6.92 - 1.03 - 0.124	HMDB0038745	Glyuranolide	Organic compounds	Lipids and lipid-like molecules	Prenol lipids	880.86	1543.97	1990.34	1044.11	2402.02	2513.38	2483.47	1690.65	1936.88	2656.76	2054.29	2766.66	3149.04	3514.74	2550.8	3767.58	3684.41	2903.62	2894.24	2828.78	2657	3198.71	2552.82	2780.52	0.000145084	1.7614	s	s	s
4.90_480.3083m/z	480.308	4.89938	neg	M-H	C23H48NO7P	-2.53702	95.3817	100 - 26.1 - 4.7 - 0.635	HMDB0011130	LysoPE(18:0/0:0)	Organic compounds	Lipids and lipid-like molecules	Glycerophospholipids	476.507	1700.58	1497.23	506.456	1703.18	1647.54	3143.81	2186.92	2823.61	3209.3	2425.92	3176.38	1653.61	2701.23	1282.76	1818.38	2894.46	1410.41	3099.55	2799.01	2944.26	3389.16	3305.5	3111.29	1.36432e-05	1.75976	s	s	s
2.28_192.0658m/z	192.066	2.28208	neg	M+FA-H	C9H9NO	-5.36283	98.7396	100 - 10.2 - 0.677	HMDB0030204	1-(2-Furanylmethyl)-1H-pyrrole	Organic compounds	Organoheterocyclic compounds	Pyrroles	281.192	565.923	635.875	323.014	715.09	866.21	1402.75	638.968	557.196	1599.65	841.939	722.821	807.603	1251.12	777.662	1093.85	1522.62	1039.19	1298.32	1350.98	1787.72	1762.24	1846.55	2221.13	8.09617e-05	1.75728	s	s	s
2.54_740.4913m/z	740.491	2.53782	neg	M-H2O-H	C40H74NO10P	5.34968	91.1425	100 - 44.9 - 11.9 - 2.32 - 0.367	HMDB0112567	PS(20:2(11Z,14Z)/14:0)	Organic compounds	Lipids and lipid-like molecules	Glycerophospholipids	1044.84	2355.29	2755.57	1247.02	2850.51	3287.07	3987.37	2546.12	3046.78	3142.32	3010.34	2997.49	2931.92	4132.41	2537.21	3635.03	4513.66	2984.87	3822.36	3583.63	3570.38	3902.2	3056.61	3865.55	0.00848176	1.7547	s	s	s
2.37_809.3934m/z	809.393	2.3671	neg	M+FA-H	C40H60O14	-4.03946	67.352	100 - 44.5 - 12.5 - 2.64 - 0.457	HMDB0034871	Spinacoside D	Organic compounds	Lipids and lipid-like molecules	Prenol lipids	1558.92	1153.72	781.782	1724.55	1181.67	819.975	95.5704	871.705	896.938	48.2217	949.334	956.095	550.431	475.731	775.936	683.626	381.527	807.123	82.1006	120.513	39.2136	57.7135	81.0208	52.0182	3.89891e-05	1.72117	s	s	s
2.35_715.3870m/z	715.387	2.35352	neg	M+FA-H	C38H50N6O5	6.80696	68.4777	100 - 44.1 - 10.5 - 1.78 - 0.237	HMDB0015362	Saquinavir	Organic compounds	Organic acids and derivatives	Carboxylic acids and derivatives	1783.94	1219.61	796.056	1864.91	1185.93	846.415	112.709	913.9	908.989	113.941	920.187	1022.29	663.434	551.347	783.455	858.732	499.64	923.615	109.467	193.625	38.4273	66.8229	170.092	8.3031	5.48574e-05	1.71673	s	s	s
2.41_779.6098m/z	779.61	2.40997	pos	2M+Na	C24H42O3	-8.22159	76.338	100 - 26.6 - 4 - 0.439	HMDB0112080	3,4-Dimethyl-5-propyl-2-furanpentadecanoic acid	Organic compounds	Lipids and lipid-like molecules	Fatty Acyls	826.522	1594.88	1864.13	1272.96	3011.66	2585.01	3370.7	2245.2	3081.17	3162.49	3391.65	3123.14	3319.43	3912.97	2973.8	3450.95	4164.08	3415.22	2947.22	3461.93	2993.7	2833.04	3428.5	3284.75	0.000131813	1.7103	s	s	s
2.42_688.3395m/z	688.339	2.4171	neg	M+FA-H	C35H49NO10	8.78132	36.0032	100 - 39.2 - 9.52 - 1.73 - 0.255	HMDB0060928	Buprenorphine glucuronide	Organic compounds	Organic oxygen compounds	Organooxygen compounds	1589.52	1385.1	1265.24	1766.45	1503.57	1272.2	225.644	1097.08	1231.4	114.981	1247.33	1223.7	941.419	773.646	1123.18	1392.28	892.816	1433.61	211.665	249.639	115.022	144.288	200.218	82.55	7.46802e-06	1.70436	s	s	s
2.41_807.4997n	828.476	2.40995	neg	M-H2O-H, M+Na-2H	C44H74NO10P	-6.64776	90.579	100 - 49.2 - 13.9 - 2.87 - 0.476	HMDB0012442	PS(22:6(4Z,7Z,10Z,13Z,16Z,19Z)/16:0)	Organic compounds	Lipids and lipid-like molecules	Glycerophospholipids	2024.09	1056.4	728.183	2284.48	1141.1	683.064	113.162	577.308	602.626	39.9999	645.815	518.91	281.764	326.903	930.822	496.033	350.097	971.608	58.0873	75.8884	30.9545	42.7763	11.623	10.063	0.000167585	1.6998	s	s	s
2.62_736.4217m/z	736.422	2.62353	neg	M+Na-2H	C12H3Br7O	0.356391	3.45563	3.09 - 0.403 - 21 - 2.74 - 61.5 - 8.01 - 100 - 13 - 97.7 - 12.7 - 57.4 - 7.42 - 18.9 - 2.42 - 2.72 - 0.342	HMDB0037546	2,2',3,4,4',5',6-Heptabromodiphenyl ether	Organic compounds	Benzenoids	Benzene and substituted derivatives	2977.39	705.121	418.252	4152.96	735.55	334.847	15.084	447.58	1427.2	5.68398	398.414	1452.08	452.765	400.33	617.875	413.559	387.966	687.92	16.5817	19.3056	14.5725	11.8467	26.5274	14.3791	0.0427364	1.69788	s	s	s
2.54_793.3766m/z	793.377	2.54497	neg	M+Cl	C38H62O15	-2.17023	66.152	100 - 42.4 - 11.8 - 2.48 - 0.429	HMDB0034327	Glucoconvallasaponin B	Organic compounds	Lipids and lipid-like molecules	Steroids and steroid derivatives	1227.48	1145.6	831.088	1382.89	1198.77	804.381	54.6775	981.046	1053.52	18.56	933.93	989.354	705.195	384.851	732.363	704.929	254.052	727.263	44.0467	58.8521	13.9216	9.62074	26.5419	25.1316	4.69341e-05	1.68547	s	s	s
2.06_706.2262m/z	706.226	2.06138	pos	M+CH3OH+H	C31H35N3O12S	-2.14008	65.5132	100 - 36.3 - 13.4 - 3.23 - 0.655 - 0.11	HMDB0135734	2-amino-4-({1-[(carboxymethyl)-C-hydroxycarbonimidoyl]-2-{[9-hydroxy-3-(2-hydroxy-4-methoxyphenyl)-8,8-dimethyl-2-oxo-2H,8H,9H,10H-pyrano[2,3-h]chromen-10-yl]sulfanyl}ethyl}-C-hydroxycarbonimidoyl)butanoic acid	Organic compounds	Organic acids and derivatives	Carboxylic acids and derivatives	339.367	1637.01	1578.64	174.515	2221.27	2362.31	2371.86	1900.9	1937.77	2473.03	2317.9	2071.88	2870.19	2459.66	1913.65	2528.11	2528.53	2641.53	2541.49	2836.38	2341.96	2442.5	2803.43	2490.78	0.00270072	1.67292	s	s	s
2.30_529.2765m/z	529.276	2.30352	neg	M-H	C30H42O8	-7.92106	42.1621	100 - 33.2 - 6.99 - 1.1 - 0.141	HMDB0030363	Cavipetin A	Organic compounds	Lipids and lipid-like molecules	Prenol lipids	1545.61	1521.4	1361.37	1651.56	1668.94	1555.7	481.628	1583.02	1442.76	382.506	1729.15	1589.47	1271.61	1015.64	1254.38	1511.82	908.417	1376.15	398.455	510.22	386.568	316.334	415.297	331.201	4.83981e-05	1.66807	s	s	s
2.37_598.3579m/z	598.358	2.37423	neg	M-H2O-H	C32H51N5O7	-5.08842	77.4867	100 - 37.3 - 8.2 - 1.33 - 0.174	HMDB0013022	Neuromedin N	Organic compounds	Organic acids and derivatives	Carboxylic acids and derivatives	1715.27	1520.32	1362.11	1781.97	1683.12	1551.95	312.89	1270.89	1236.75	270.447	1445.02	1370.26	1117.87	717.13	1300.38	1433.98	739.948	1412.52	386.864	524.152	384.824	369.742	495.626	371.821	5.40963e-05	1.64728	s	s	s
2.49_557.3287m/z	557.329	2.48853	neg	M+Cl	C26H53NO7P+	6.38479	89.5338	100 - 29.4 - 5.6 - 0.8	HMDB0061701	2-Oleoylglycerophosphocholine	Organic compounds	Lipids and lipid-like molecules	Glycerophospholipids	1671.26	1291	964.357	1955.66	1371.98	980.139	243.864	1003.48	1272.94	135.801	1018.38	1262.73	792.223	551.443	863.841	1056.42	521.615	989.854	272.971	359.144	280.422	243.866	243.653	250.473	0.000226068	1.64013	s	s	s
3.28_498.2877m/z	498.288	3.27787	neg	M+Na-2H	C21H43N5O7	-6.83649	99.1498	100 - 25.3 - 4.51 - 0.602	HMDB0014936	Gentamicin	Organic compounds	Organic oxygen compounds	Organooxygen compounds	690.843	844.566	972.153	731.744	891.469	1151.49	1589.51	971.058	760.583	1698.34	1148.33	899.197	1167.15	1439.28	1287.14	1289.67	1575.98	1621.92	1244.32	1509.87	2273.47	1606.02	1825.55	2930.39	0.00140626	1.63081	s	s	s
4.39_426.3585m/z	426.359	4.39438	pos	M+ACN+H	C23H44O4	1.96271	98.9719	100 - 25.5 - 3.95 - 0.454	HMDB0036344	Tetrahydropersin	Organic compounds	Lipids and lipid-like molecules	Fatty Acyls	235.368	263.021	600.206	386.766	444.353	974.339	1105.57	902.569	1380.66	1380.31	1258.82	1898.12	2620.41	2301.45	2120.31	3472.66	2862.51	3055.21	1421.31	1818.79	850.846	1706.52	1968.15	916.586	8.8372e-08	1.61745	s	s	s
2.65_255.1130m/z	255.113	2.65212	neg	M+FA-H	C14H14N2	-4.45139	97.8137	100 - 16 - 1.2	HMDB0015656	Naphazoline	Organic compounds	Benzenoids	Naphthalenes	587.005	753.717	775.668	927.575	900.853	812.058	1406.53	1136.71	620.43	1636.24	1274.81	809.389	950.123	1056.86	1161.09	1083.44	1390.73	1601.84	1244.66	1499.1	2286.65	1439.54	1909.09	2881.1	0.000936708	1.60887	s	s	s
0.50_307.6539m/z	307.654	0.496983	pos	M+H+Na	C32H41N5O6	9.34693	96.842	100 - 37.1 - 7.94 - 1.24 - 0.156	HMDB0029334	Nummularine B	Organic compounds	Organic acids and derivatives	Carboxylic acids and derivatives	562.155	696.717	680.75	643.972	771.908	722.5	768.642	800.626	1043.67	987.499	1010.12	870.507	1187.01	1084.21	1257.92	1015.9	1180.41	1109.34	1630.71	1522.43	2039.06	1796.89	1541.69	2035.9	0.000481245	1.60738	s	s	s
4.47_452.2768m/z	452.277	4.46578	neg	M-H	C21H44NO7P	-3.2131	94.9807	100 - 23.9 - 4.16 - 0.54	HMDB0011503	LysoPE(16:0/0:0)	Organic compounds	Lipids and lipid-like molecules	Glycerophospholipids	747.977	2037.29	1719.02	803.274	2134.76	2119.67	3557.92	2768.9	3117.06	3882.9	3238.01	3359.37	2046.16	2806.24	1742.53	2338.08	2982.95	2109.98	3175.28	3089.07	3090.06	3541.34	3666.69	3406.41	3.28336e-06	1.60641	s	s	s
2.41_585.3201m/z	585.32	2.40995	neg	2M+FA-H	C18H22O2	-3.81454	74.1898	100 - 19.8 - 2.27 - 0.19	HMDB0000145	Estrone	Organic compounds	Lipids and lipid-like molecules	Steroids and steroid derivatives	1432.84	986.608	787.578	1686.06	1060.4	762.348	124.49	744.2	871.177	81.62	737.477	827.962	634.317	427.567	644.021	733.79	412.751	717.541	129.332	185.799	93.6263	87.1488	130.61	61.2258	3.66265e-05	1.58793	s	s	s
2.42_825.4203m/z	825.42	2.4171	neg	M+FA-H	C41H64O14	-9.66096	59.2132	100 - 45.6 - 13 - 2.79 - 0.487	HMDB0001917	Digoxin	Organic compounds	Lipids and lipid-like molecules	Steroids and steroid derivatives	1325.76	885.054	709.506	1466.32	905.227	622.982	39.9228	751.799	851.949	5.63625	676.973	704.969	568.376	271.665	649.272	543.056	161.942	601.115	25.9718	50.0909	6.26235	13.7637	15.8776	4.97107	7.59856e-05	1.57898	s	s	s
2.38_955.4651m/z	955.465	2.38138	neg	M+Cl	C45H76O19	-2.5656	34.0714	100 - 50.3 - 16.3 - 3.95 - 0.789 - 0.135	HMDB0039485	Trigofoenoside B	Organic compounds	Lipids and lipid-like molecules	Steroids and steroid derivatives	1254.36	1075.17	826.506	1282.55	1137.69	818.929	143.66	825.896	936.494	79.9326	847.264	981.128	644.872	581.571	759.437	858.974	558.807	874.256	104.531	178.039	40.8337	81.73	86.2246	11.1327	9.69036e-06	1.55401	s	s	s
2.59_375.0974m/z	375.097	2.59497	neg	M+Cl	C20H20O5	-9.06246	94.4046	100 - 22.1 - 3.34 - 0.38	HMDB0129264	(2E)-3-phenyl-1-[2,3,4,6-tetrahydroxy-5-(3-methylbut-2-en-1-yl)phenyl]prop-2-en-1-one	Organic compounds	Phenylpropanoids and polyketides	Linear 1,3-diarylpropanoids	364.799	546.994	698.928	415.828	636.229	776.095	1455.27	816.024	566.996	1632.64	1008.46	681.596	748.663	954.35	891.252	912.059	1105.25	1106.99	1132.61	1325.82	1800.63	1385.32	1675.8	2158.34	0.000156873	1.54532	s	s	s
2.17_749.3595m/z	749.359	2.1685	neg	2M+FA-H	C21H24N2O3	5.50299	27.6362	100 - 23.8 - 3.33 - 0.344	HMDB0030390	(+)-Quebrachidine	Organic compounds	Alkaloids and derivatives	Corynanthean-type alkaloids	1527.97	1232.22	801.439	1727.32	1321.82	961.554	550.726	917.853	745.914	609.263	1039.06	977.708	701.078	658.869	789.358	892.644	648.774	1038.08	318.161	428.622	263.372	388.705	544.299	327.801	1.39771e-05	1.53775	s	s	s
2.41_821.4163m/z	821.416	2.40995	neg	M+FA-H	C38H64O16	-1.7582	82.2861	100 - 42.4 - 12.1 - 2.58 - 0.455	HMDB0033499	Lyciumoside IV	Organic compounds	Lipids and lipid-like molecules	Prenol lipids	1189.29	874.517	692.217	1328.25	894.995	627.894	49.9561	750.892	866.461	31.3108	711.968	840.578	494.195	317.996	639.558	428.335	268.636	645.256	62.7239	80.9503	38.8702	25.709	38.0581	32.4639	8.06917e-05	1.53657	s	s	s
2.44_926.4657n	891.452	2.43855	pos	M+H-2H2O, M+H	C50H70O16	-0.743857	71.9881	100 - 55.5 - 18.4 - 4.51 - 0.898 - 0.152	HMDB0037911	Tragopogonsaponin B	Organic compounds	Lipids and lipid-like molecules	Prenol lipids	864.58	975.024	828.463	780.016	909.715	660.436	228.698	628.552	740.4	43.6083	666.853	505.216	553.19	257.139	158.187	254.326	343.543	267.149	91.2502	65.9279	38.8635	78.3538	96.412	47.8181	9.36001e-07	1.52635	s	s	s
3.05_333.0902m/z	333.09	3.05	neg	M+Cl	C18H18O4	0.967202	94.9348	100 - 19.8 - 2.68 - 0.272	HMDB0006101	Enterolactone	Organic compounds	Lignans, neolignans and related compounds	Furanoid lignans	692.889	650.659	710.961	978.902	712.239	940.444	1408.97	838.366	825.768	1620.24	1126.23	1092.6	744.053	1083.72	1088.61	1046.2	1254.42	1776.63	1030	1248.07	1814.99	1565.74	2444.65	2672.21	0.00316031	1.52585	s	s	s
2.20_458.2587m/z	458.259	2.20352	neg	M+FA-H	C25H35NO4	9.42031	47.9341	100 - 28 - 4.58 - 0.554	HMDB0060546	Norbuprenorphine	Organic compounds	Benzenoids	Phenanthrenes and derivatives	2292.59	1924.15	1810.19	2641.04	2127.64	2003.46	652.396	1667.49	1334.3	534.722	1936.04	1506.87	1639.26	1347.85	2090.33	2068.72	1385.38	2413.04	674.49	957.909	681.893	754.079	1022.01	706.432	4.53728e-05	1.5212	s	s	s
0.81_325.0950n	308.092	0.809867	pos	M+H-H2O, M+NH4, M+Na	C18H15NO5	-0.0378195	90.6108	100 - 20.2 - 2.96 - 0.324	HMDB0033193	Avenanthramide L	Organic compounds	Benzenoids	Benzene and substituted derivatives	707.118	1356.24	1570.13	745.099	1823.8	1990.46	2864.6	1985.15	2969.6	2858.36	2573.62	3486.93	2494.93	3051.09	6718.62	2398.82	2990.93	2149.8	2731.1	2558.47	2191.65	3394.37	2962.7	2582.8	0.0139169	1.49245	s	s	s
2.50_439.0315n	438.024	2.50282	neg	M-H, M+Cl, M+Na-2H	C11H21NO11S3	8.75993	85.2249	100 - 15.3 - 16.9 - 2.36 - 1.17 - 0.148	HMDB0038407	Glucocheirolin	Organic compounds	Organic oxygen compounds	Organooxygen compounds	803.952	1382.45	1803.11	981.854	1622.21	2063.17	2233.55	1642.26	1513.47	1624.31	1985.65	1591.92	1599.31	2390.91	2028.67	2267.99	2586.25	2533.26	2063.99	2296.04	2260.54	2192.56	2065	2521	0.00150672	1.48469	s	s	s
2.37_1381.6576m/z	1381.66	2.3671	neg	M-H	C65H106O31	-5.0396	46.9025	100 - 72.7 - 32.4 - 10.8 - 2.92 - 0.679 - 0.139	HMDB0041355	Matesaponin 5	Organic compounds	Lipids and lipid-like molecules	Prenol lipids	1427.76	918.28	456.913	1459.12	895	457.216	118.283	626.674	500.702	142.758	523.191	529.038	390.258	452.205	550.984	525.298	359.425	632.968	54.2928	42.3025	15.2721	35.1135	25.0054	7.42789	5.98345e-05	1.48084	s	s	s
0.81_346.0538m/z	346.054	0.809867	neg	M+Na-2H	C14H15NO8	-2.09336	86.282	100 - 16 - 2.84 - 0.318	HMDB0059997	Dihyroxy-1H-indole glucuronide I	Organic compounds	Organic oxygen compounds	Organooxygen compounds	494.343	1391.16	977.351	462.416	1723.92	1185.35	1333.8	1463.99	2038.13	1546.85	2082.68	2733.65	1977.6	2556.94	1775.17	2786.01	3601.46	2370.14	1248.94	1711.38	2269.9	1704.56	2292.99	2876.48	0.0020726	1.47851	s	s	s
2.02_246.1708m/z	246.171	2.01922	pos	M+ACN+H	C10H20O4	3.97175	98.8852	100 - 11.2 - 1.39 - 0.109	HMDB0039974	(1S,2S,4R,8R)-p-Menthane-1,2,8,9-tetrol	Organic compounds	Lipids and lipid-like molecules	Prenol lipids	370.866	751.808	926.479	458.484	1026.52	1316.17	1105.16	863.734	1102.39	1254.9	1134.38	1464.89	1528.41	1847.33	1762.11	1596.64	1941.74	1977.48	1506.82	1596.7	1453.49	1620.39	1525.04	1417.09	2.2994e-06	1.47828	s	s	s
5.18_509.2864m/z	509.286	5.17725	neg	2M+FA-H	C15H20O2	-9.58015	94.3137	100 - 16.5 - 1.69 - 0.129	HMDB0134130	(2Z)-2-[(2-hydroxyphenyl)methylidene]octanal	Organic compounds	Phenylpropanoids and polyketides	Cinnamaldehydes	566.456	1415.15	1521.88	548.762	1375.73	1597.59	624.987	473.147	597.901	536.974	420.526	538.91	875.335	1155.49	654.37	838.759	1062.4	611.226	119.574	59.914	120.023	52.9643	2.90883	95.7001	5.49063e-06	1.47545	s	s	s
3.05_289.1007m/z	289.101	3.05	neg	M-H2O-H	C18H16N2O3	7.87594	93.5271	100 - 20.5 - 2.61 - 0.249	HMDB0037521	C.I. Solvent Red 80	Organic compounds	Organoheterocyclic compounds	Azobenzenes	665.283	629.819	670.999	761.572	742.251	809.871	1374.26	893.712	502.696	1438.71	1197.05	596.737	833.485	1044.16	1049.63	971.548	1207.05	1230.54	1115	1388.25	2192.14	1222.6	1522.92	2491.73	0.00142108	1.47377	s	s	s
4.56_478.2929m/z	478.293	4.55793	neg	M-H	C23H46NO7P	-2.1155	95.04	100 - 26 - 4.69 - 0.634	HMDB0011506	LysoPE(18:1(9Z)/0:0)	Organic compounds	Lipids and lipid-like molecules	Glycerophospholipids	2340.64	5349.86	5648.61	2324.29	5642.58	6074.89	5114.83	3752.23	4029.82	4947.38	4215.16	3980.16	6814.65	9238.5	5791.2	7674.25	9439.65	6741.77	5056.1	5256.13	5278.01	5155.65	5330.87	5559.23	0.00035327	1.46748	s	s	s
2.38_634.3390m/z	634.339	2.3814	pos	2M+NH4	C19H20N2O2	0.435202	21.4144	100 - 21.6 - 2.63 - 0.233	HMDB0014950	Phenylbutazone	Organic compounds	Benzenoids	Benzene and substituted derivatives	1190.43	915.919	631.517	1273.33	866.41	342.527	86.3864	491.328	546.4	38.9159	393.214	258.616	437.674	307.387	60.3277	203.135	100.47	313.355	69.5968	117.844	61.4731	19.9203	41.9945	29.373	1.60935e-05	1.46072	s	s	s
0.49_614.3000m/z	614.3	0.48985	pos	M+CH3OH+H	C21H39N7O12	1.40041	95.5521	100 - 26.2 - 5.76 - 0.911 - 0.124	HMDB0015214	Streptomycin	Organic compounds	Organic oxygen compounds	Organooxygen compounds	539.769	549.983	621.65	685.729	684.224	838.745	1340.72	746.478	511.582	1528.72	957.906	651.98	724.373	831.53	1065.47	780.073	1022.33	995.579	1119.38	1335.84	2199.64	1185.91	1414.72	2329.32	0.000941158	1.42239	s	s	s
2.43_608.3696n	629.344	2.43138	neg	M+Na-2H, M+Cl	C37H52O7	-2.84675	69.3686	100 - 40.9 - 9.58 - 1.64 - 0.225	HMDB0035262	Avenestergenin A2	Organic compounds	Lipids and lipid-like molecules	Prenol lipids	1225.07	1043.35	953.296	1287.38	1131.39	970.827	341.821	900.352	1002.79	164.76	881.365	1016.08	720.279	640.136	858.62	948.325	513.397	910.458	340.783	321.902	264.092	274.764	183.999	247.643	2.42195e-05	1.42159	s	s	s
2.34_647.3111m/z	647.311	2.33923	neg	2M-H	C17H24O6	5.93442	52.2326	100 - 18.9 - 2.92 - 0.327	HMDB0033504	AF Toxin II	Organic compounds	Lipids and lipid-like molecules	Fatty Acyls	1085.08	769.214	599.771	1097.83	855.798	685.583	105.864	675.469	634.584	100.117	743.664	726.238	533.788	400.524	571.441	563.828	339.793	589.083	73.5316	112.397	71.0172	51.4474	134.386	54.2761	1.69512e-05	1.41682	s	s	s
2.24_901.4551m/z	901.455	2.23923	neg	2M+FA-H	C25H28N6O	-9.34769	45.9534	100 - 29.6 - 4.43 - 0.449	HMDB0015163	Irbesartan	Organic compounds	Benzenoids	Benzene and substituted derivatives	930.406	730.639	454.239	990.281	833.821	480.514	79.9479	606.442	543.321	55.9483	563.442	588.263	379.756	202.546	393.178	434.37	117.802	357.68	20.3879	47.2052	35.8358	14.2271	27.9818	2.61166	2.23993e-05	1.41257	s	s	s
2.11_743.3993m/z	743.399	2.11137	neg	M+Na-2H	C39H62O12	0.694028	82.3176	100 - 43.4 - 11.6 - 2.33 - 0.38	HMDB0029312	Ophiopogonin C'	Organic compounds	Lipids and lipid-like molecules	Steroids and steroid derivatives	1050.15	696.623	447.749	1193.64	706.972	544.499	146.706	476.684	426.998	113.834	538.744	518.033	279.837	220.956	365.725	306.852	219.174	442.476	46.4784	73.9132	71.3135	26.1036	76.6859	47.8447	1.25021e-05	1.41097	s	s	s
4.90_508.3393m/z	508.339	4.89938	neg	M-H	C25H52NO7P	-3.05008	93.553	100 - 28.3 - 5.29 - 0.742	HMDB0012108	LysoPC(17:0)	Organic compounds	Lipids and lipid-like molecules	Glycerophospholipids	177.404	670.438	657.116	165.594	605.33	714.82	1421.88	667.658	731.46	1264.76	654.657	737.337	635.173	1070.32	583.093	642.731	1071.46	600.323	1282.06	1178.27	1590.76	1311.86	1383.14	1595.95	7.31585e-05	1.40977	s	s	s
2.46_670.3433m/z	670.343	2.45995	neg	M+FA-H	C32H51NO11	-1.84721	37.5281	100 - 36 - 8.55 - 1.52 - 0.223	HMDB0002579	Glycochenodeoxycholic acid 3-glucuronide	Organic compounds	Lipids and lipid-like molecules	Steroids and steroid derivatives	976.343	896.651	821.801	1087.53	963.326	779.538	163.417	761.516	846.289	37.0881	833.943	816.349	583.744	426.228	726.208	937.535	378.971	831.468	91.5558	134.816	71.5499	79.7844	93.8159	54.4984	3.25336e-05	1.39079	s	s	s
0.81_156.0585n	191.019	0.809867	neg	M+Na-2H, M+Cl	C11H8O	6.1023	93.4049	100 - 12 - 0.864	HMDB0060349	2-Naphthaldehyde	Organic compounds	Benzenoids	Naphthalenes	355.773	484.71	760.575	396.395	692.378	1107.21	1367.63	712.562	871.571	2089.82	1169.25	1189.03	1029.53	1678.15	965.576	1611.04	2486.22	1430.17	1968.26	1309.47	685.626	2848.11	1924.27	953.293	0.0257486	1.38979	s	s	s
2.64_555.3485m/z	555.348	2.63782	neg	M-H2O-H	C37H50O5	0.844022	72.8365	100 - 40.8 - 9.13 - 1.46 - 0.185	HMDB0032894	3-Benzoyloxy-11-oxo-12-ursen-28-oic acid	Organic compounds	Lipids and lipid-like molecules	Prenol lipids	817.384	781.826	671.38	1065.57	824.872	590.885	34.8561	649.748	693.433	4.03647	686.62	639.764	615.054	162.83	533.7	614.445	131.158	515.663	45.7996	79.5758	44.3659	15.7859	10.2195	6.18465	9.19148e-05	1.3828	s	s	s
2.06_706.3692m/z	706.369	2.06138	pos	M+K	C29H57N5O12	8.43386	71.8282	100 - 34.3 - 8.18 - 1.46 - 0.216	HMDB0059796	Gluten exorphin C	Organic compounds	Organic acids and derivatives	Carboxylic acids and derivatives	417.622	1281.88	1269.74	196.973	1794.67	1754.81	1870.77	1497.01	1494.03	1831.85	1894.52	1516.15	2219	1945.09	1539.03	1874.01	1994.12	2096.2	1905.41	2094.32	1804.08	1848.22	2015.52	1969.82	0.0030208	1.37853	s	s	s
2.40_545.2757m/z	545.276	2.39567	neg	3M-H	C10H14O3	0.150304	70.0114	100 - 11.1 - 1.17	HMDB0059891	Isoamyl 2-furoate	Organic compounds	Organoheterocyclic compounds	Furans	1145.17	1066.86	922.413	1275.32	1156.3	997.068	270.156	916.114	862.597	230.756	972.848	938.695	831.871	574.809	840.256	1001.28	614.393	973.019	244.29	358.489	235.379	224.835	362.521	237.635	1.63943e-05	1.37755	s	s	s
2.35_573.2914m/z	573.291	2.35352	neg	M+Na-2H	C30H48O7S	8.35308	85.8303	100 - 34.1 - 11.6 - 2.59 - 0.464	HMDB0004309	Triterpenoid	Organic compounds	Lipids and lipid-like molecules	Prenol lipids	3388.49	3037.54	2856.53	3697.75	3373.79	3272.48	1566.77	2742.69	2177.67	1498.51	3198.69	2553.82	2686.67	2425.37	3368.2	3466.37	2724.6	3975.13	1550.85	2002.49	1622.17	1787.33	2346.22	1905	0.000175162	1.37317	s	s	s
2.79_964.5151m/z	964.515	2.78712	neg	M+Cl	C51H79NO14	-4.74074	89.8823	100 - 57 - 18.8 - 4.55 - 0.888 - 0.147	HMDB0127633	(1R,16Z,24E,26E,28Z)-1,18-dihydroxy-12-[1-(4-hydroxy-3-methoxycyclohexyl)propan-2-yl]-15-(hydroxymethyl)-19,30-dimethoxy-17,21,23,29,35-pentamethyl-11,36-dioxa-4-azatricyclo[30.3.1.0鈦?鈦筣hexatriaconta-16,24,26,28-tetraene-2,3,10,14,20-pentone	Organic compounds	Phenylpropanoids and polyketides	Macrolide lactams	1345.75	679.968	382.842	1700.63	734.186	376.949	115.202	367.073	666.462	85.3648	466.439	584.138	326.708	634.045	285.483	305.939	482.967	262.573	74.3691	73.4437	38.6093	71.0374	49.6696	35.0726	0.00170737	1.37056	s	s	s
2.10_759.3995m/z	759.399	2.10422	neg	M-H2O-H	C41H62O14	4.29969	72.9538	100 - 45.6 - 13 - 2.78 - 0.486	HMDB0039591	Periandrin V	Organic compounds	Lipids and lipid-like molecules	Prenol lipids	1004.45	660.723	385.801	1164.34	637.014	406.766	39.5735	522.541	381.617	41.4273	495.56	494.125	289.913	119.803	320.438	321.006	96.0714	400.353	11.594	19.6296	4.21542	14.0045	22.7189	22.4518	0.000108203	1.35666	s	s	s
2.44_800.3881m/z	800.388	2.43853	neg	3M-H	C10H21NO7	-0.0089436	25.8248	100 - 11.7 - 2.06 - 0.188	HMDB0015598	Voglibose	Organic compounds	Organic oxygen compounds	Organooxygen compounds	1259.09	1107	974.791	1454.72	1078.21	1031.14	303.333	951.173	1005.41	235.749	979.87	974.761	708.225	520.536	910.045	845.733	521.86	1009.68	296.293	390.91	402.404	315.315	404.8	502.566	0.000173569	1.35203	s	s	s
2.63_527.3166m/z	527.317	2.63068	neg	M+Cl	C29H48O6	4.25445	52.7077	100 - 32.1 - 6.23 - 0.896 - 0.104	HMDB0033907	Homodolicholide	Organic compounds	Lipids and lipid-like molecules	Steroids and steroid derivatives	1170.39	1155.41	1012.71	1481.18	1245.7	1000.25	238.599	1054.06	1042.5	170.363	1068.01	917.411	1035.59	660.6	995.187	1181.1	636.036	1161.27	292.353	397.154	258.578	214.171	323.346	253.773	8.20739e-05	1.34808	s	s	s
2.91_978.4953m/z	978.495	2.90785	neg	M-H	C50H77NO16S	6.41959	88.9785	100 - 56.7 - 23.6 - 7.27 - 1.82 - 0.383	HMDB0127699	[(1R,16Z,24E,26E,28Z)-1,19-dihydroxy-12-[1-(4-hydroxy-3-methoxycyclohexyl)propan-2-yl]-30-methoxy-15,17,21,23,29,35-hexamethyl-2,3,10,14,20-pentaoxo-11,36-dioxa-4-azatricyclo[30.3.1.0鈦?鈦筣hexatriaconta-16,24,26,28-tetraen-18-yl]oxidanesulfonic acid	Organic compounds	Phenylpropanoids and polyketides	Macrolide lactams	1890.97	1047	135.542	2140.01	1088.97	113.087	81.8974	225.894	243.596	61.3739	210.421	162.989	149.392	576.731	302.974	194.502	427.966	316.664	75.0014	148.855	71.4525	66.1303	97.7219	41.3904	0.00309963	1.34712	s	s	s
2.37_943.4674m/z	943.467	2.3671	neg	M+FA-H	C46H76O13P2	-7.72888	78.3971	100 - 51.1 - 15.5 - 3.46 - 0.625	HMDB0116475	PGP(22:6(4Z,7Z,10Z,13Z,16Z,19Z)/18:2(9Z,12Z))	Organic compounds	Lipids and lipid-like molecules	Glycerophospholipids	985.217	659.991	461.241	944.675	727.688	516.292	120.445	583.421	508.269	93.5761	585.6	558.496	387.235	223.896	496.293	449.597	120.707	437.389	59.1477	89.436	54.4024	63.6759	78.9021	47.2693	4.24472e-05	1.32556	s	s	s
2.59_330.0570n	351.032	2.59497	neg	M+Na-2H, 2M+FA-H	C13H14O10	-5.23842	86.0117	100 - 14.6 - 3.05 - 0.341	HMDB0134111	6-(2,5-dihydroxybenzoyloxy)-3,4,5-trihydroxyoxane-2-carboxylic acid	Organic compounds	Organic oxygen compounds	Organooxygen compounds	581.696	748.425	867.708	747.886	831.677	824.623	1446.61	987.876	624.881	1484.16	1083.5	750.549	925.647	899.805	1113.89	1048.69	1138.09	1445.5	1099.34	1346.59	1717.31	1234.77	1615.49	1894.73	0.00122507	1.31776	s	s	s
2.37_405.2121m/z	405.212	2.3671	neg	M-H	C19H34O9	-2.34566	54.2124	100 - 21.3 - 4 - 0.531	HMDB0038691	Kiwiionoside				1105.81	692.596	643.086	1289.9	784.729	668.492	54.1869	560.462	672.255	21.8275	602.048	663.493	579.589	349.873	729.661	677.013	246.753	737.562	94.0133	138.148	76.0667	29.316	73.9449	43.9614	9.74807e-05	1.31761	s	s	s
2.47_280.1314n	559.256	2.47425	neg	2M-H, 3M-H	C15H20O5	1.18742	74.7693	100 - 16.6 - 2.32 - 0.233	HMDB0133288	2-hydroxy-3-[4-hydroxy-3-methoxy-5-(3-methylbut-2-en-1-yl)phenyl]propanoic acid	Organic compounds	Phenylpropanoids and polyketides	Phenylpropanoic acids	2289.67	1910.52	1408.09	2871.95	2050.53	1298.95	673.303	1412.85	2022.09	445.318	1588.1	2013.9	1389.69	2002.13	1777.45	1971.08	2384.08	2214.36	701.366	858.84	700.285	742.375	710.929	855.351	0.000662084	1.31178	s	s	s
2.51_859.4212m/z	859.421	2.50995	neg	2M-H	C21H35O7P	5.07619	48.235	100 - 23.4 - 4.05 - 0.521	HMDB0114745	LysoPA(18:4(6Z,9Z,12Z,15Z)/0:0)	Organic compounds	Lipids and lipid-like molecules	Glycerophospholipids	745.048	726.15	604.2	789.708	727.784	592.01	53.9888	552.571	605.974	17.6566	652.602	581.868	478.737	203.978	522.387	527.195	158.287	598.82	27.9212	42.5561	12.5086	12.6725	6.91991	10.7683	2.7034e-05	1.30822	s	s	s
0.60_466.1216m/z	466.122	0.603417	neg	M-H	C21H25NO9S	8.2439	85.8109	100 - 24.5 - 9.25 - 1.74 - 0.306	HMDB0135488	3-(3,4-dimethoxyphenyl)-N-[2-(3,4-dimethoxyphenyl)-2-(sulfooxy)ethyl]prop-2-enimidic acid	Organic compounds	Benzenoids	Benzene and substituted derivatives	405.944	929.472	714.975	428.759	944.389	1217.05	1750.27	592.297	1171.63	1147.4	1680.56	1703.89	1178.74	721.42	1431.56	1667.79	2407.45	1169.98	1604.45	1735.66	1658.04	1846.41	1514.35	1318.95	0.0123744	1.29813	s	s	s
2.34_524.2235n	523.216	2.33923	neg	M-H, M+Na-2H	C26H36O11	-4.2699	91.3215	100 - 29 - 6.3 - 1.02 - 0.138	HMDB0037083	(8R,8'R)-Secoisolariciresinol 9-glucoside	Organic compounds	Lignans, neolignans and related compounds	Lignan glycosides	1656.58	1280.35	1247.15	1760.11	1379.43	1243.88	722.784	1281.73	979.835	658.533	1261.42	1032.71	1130.78	936.19	1510.03	1232.67	938.504	1493.57	516.37	760.978	576.328	480.126	795.779	526.917	3.11134e-05	1.29558	s	s	s
2.58_837.3893m/z	837.389	2.58068	neg	M-H	C42H62O17	-2.4838	77.2864	100 - 46.8 - 14.2 - 3.23 - 0.604	HMDB0039318	Licoricesaponin G2	Organic compounds	Lipids and lipid-like molecules	Prenol lipids	867.876	803.548	649.034	1198.75	823.486	589.984	30.3907	774.634	769.614	23.7993	763.829	845.854	801.419	363.93	679.73	867.767	418.33	735.458	36.9705	55.9462	15.3844	21.129	58.9999	5.0376	0.000151229	1.29227	s	s	s
2.24_839.4376m/z	839.438	2.23923	neg	M+Cl	C44H68O13	2.68181	88.4809	100 - 48.9 - 14.4 - 3.13 - 0.553	HMDB0038517	Dinophysistoxin 2	Organic compounds	Organic acids and derivatives	Hydroxy acids and derivatives	3301.74	2652.01	2555.41	3539.67	2844.93	2992.02	709.878	2398.18	1660.59	829.538	2545.29	2035.98	2647.48	2080.09	3704.34	3206.79	2035.34	4172.85	1040.43	1607.75	1228.6	1179.79	1853.15	1230.32	0.000203497	1.28949	s	s	s
0.62_134.0210n	133.014	0.62485	neg	M-H2O-H, M-H	C4H6O5	-4.24991	96.7947	100 - 4.59 - 1.11	HMDB0031518	D-Malic acid	Organic compounds	Lipids and lipid-like molecules	Fatty Acyls	839.53	1809.14	1710.23	945.416	2357.98	2185.6	1829.62	1502.6	1539.35	2590.34	2072.98	2256.3	2151.25	2873.89	1835.86	3161.85	3932.42	2715.17	1705.58	1802.94	2179.89	2464.01	3035.26	3072.99	0.0227354	1.28902	s	s	s
2.12_878.4201m/z	878.42	2.1185	neg	3M-H	C19H19NO2	3.02906	61.3478	100 - 21.2 - 2.55 - 0.223	HMDB0033737	Dehydronuciferine	Organic compounds	Alkaloids and derivatives	Aporphines	812.969	706.578	500.456	842.187	721.206	567.459	216.953	573.183	454.993	171.807	587.513	521.183	379.406	233.634	480.767	414.723	119.329	507.037	102.209	169.538	64.7614	88.0802	175.729	60.2735	6.87365e-06	1.2839	s	s	s
2.50_1199.5716n	1234.58	2.49567	neg	M-H2O-H, M+Cl	C55H77N17O14	-9.98882	74.569	100 - 67.1 - 25.1 - 6.75 - 1.45 - 0.262	HMDB0012965	Gonadotropin releasing hormone	Organic compounds	Organic Polymers	Polypeptides	847.125	706.983	464.099	769.287	657.817	456.632	119.44	603.92	650.205	51.4416	584.62	590.798	426.826	406.992	388.102	503.978	329.485	394.514	61.3201	27.0268	10.0015	30.881	22.4487	50.2292	2.09874e-05	1.27325	s	s	s
2.58_746.3798m/z	746.38	2.58068	neg	3M-H	C16H15N3	9.77567	51.3876	100 - 18.6 - 1.63	HMDB0014889	Epinastine	Organic compounds	Organoheterocyclic compounds	Benzazepines	785.262	605.299	491.561	990.33	631.877	447.865	15.1551	443.771	551.677	43.7781	417.427	564.588	297.003	125.056	394.002	302.318	116.021	435.297	37.4883	73.1281	35.4635	28.7022	86.2139	42.4544	7.4672e-05	1.2675	s	s	s
2.27_627.3267m/z	627.327	2.2678	neg	M-H	C39H48O7	-9.54749	40.7774	100 - 43 - 10.5 - 1.85 - 0.261	HMDB0037793	(3S,5R,6R,6'S)-6,7-Didehydro-5,6-dihydro-3,5,6'-trihydroxy-13,14,20-trinor-3'-oxo-beta,epsilon-caroten-19',11'-olide 3-acetate	Organic compounds	Lipids and lipid-like molecules	Prenol lipids	721.121	627.933	424.322	777.107	694.562	451.544	49.6958	547.089	516.374	64.1781	554.631	567.648	409.503	214.344	409.622	366.465	160.084	407.265	26.7518	39.8173	23.8879	25.3149	51.2901	14.7287	3.47859e-05	1.26307	s	s	s
2.19_679.3226m/z	679.323	2.18993	neg	2M+FA-H	C18H23NO4	-1.55622	44.7812	100 - 20.3 - 2.77 - 0.284	HMDB0039765	Pandamarilactone 1	Organic compounds	Organoheterocyclic compounds	Azaspirodecane derivatives	1248.23	875.09	477.468	1342.99	887.868	533.513	131.164	570.499	714.365	130.987	633.509	792.662	541.884	882.418	628.877	604.592	755.097	733.832	159.483	192.779	48.9678	124.067	203.193	30.094	0.000170022	1.25384	s	s	s
2.35_526.2889m/z	526.289	2.35352	neg	M+Na-2H	C25H48NO7P	-5.25166	33.3307	100 - 28.2 - 5.27 - 0.74	HMDB0011513	LysoPE(20:2(11Z,14Z)/0:0)	Organic compounds	Lipids and lipid-like molecules	Glycerophospholipids	972.443	939.868	837.444	1061.46	968.427	907.801	315.103	771.894	793.566	222.459	817.443	844.635	682.761	560.574	803.019	891.723	575.994	836.371	270.344	380.085	279.685	220.75	283.315	233.832	8.30666e-06	1.2461	s	s	s
2.45_541.3292m/z	541.329	2.45282	neg	M+Cl	C30H50O6	-1.9054	71.8132	100 - 33.3 - 6.59 - 0.965 - 0.114	HMDB0034519	Theasapogenol A	Organic compounds	Lipids and lipid-like molecules	Prenol lipids	890.157	1064.77	1022.09	925.039	1137.88	1015.43	445.328	980.145	931.643	277.095	1074.66	889.786	777.388	656.332	876.505	1012.34	537.507	980.493	369.292	425.843	294.2	334.732	310.933	309.696	7.59431e-05	1.23768	s	s	s
2.24_862.4329n	863.44	2.23925	pos	M+H, M+ACN+H	C46H62N4O12	-4.10734	61.6328	100 - 52.4 - 15.9 - 3.55 - 0.637	HMDB0060754	31-Hydroxy rifabutin	Organic compounds	Organoheterocyclic compounds	Naphthofurans	1279.01	950.106	733.888	738.115	627.759	473.211	354.072	643.976	419.214	253.226	440.183	269.554	534.085	336.333	363.469	291.914	130.723	509.509	194.347	300.064	261.888	105.984	140.89	144.052	7.81719e-05	1.23705	s	s	s
2.24_549.2419m/z	549.242	2.23923	neg	M-H2O-H	C34H36N2O6	4.16335	73.1049	100 - 38.1 - 8.31 - 1.32 - 0.168	HMDB0031751	y-Morphine	Organic compounds	Alkaloids and derivatives	Morphinans	1211.15	721.595	402.24	1340.51	776.934	461.013	153.221	543.77	471.981	184.393	507.723	482.864	388.983	421.577	643.875	394.222	321.853	594.332	101.567	193.982	176.429	80.7294	193.999	114.36	0.000418009	1.23665	s	s	s
2.37_982.5001m/z	982.5	2.3671	neg	M-H	C44H69N15O9S	-5.02744	49.9721	100 - 55 - 21.2 - 6.09 - 1.39 - 0.262	HMDB0059791	Adrenorphin	Organic compounds	Organic acids and derivatives	Carboxylic acids and derivatives	988.04	863.98	588.163	1035	922.866	661.094	135.328	752.191	748.374	89.3501	736.026	862.565	581.149	708.847	720.424	737.278	722.407	778.48	166.972	186.676	66.927	129.661	161.244	58.3009	3.01129e-05	1.2317	s	s	s
2.26_438.7499m/z	438.75	2.26067	pos	M+H+Na	C45H76NO12P	-8.55788	55.7256	100 - 50.4 - 14.9 - 3.24 - 0.57	HMDB0061624	PS(MonoMe(9,5)/DiMe(11,3))	Organic compounds	Lipids and lipid-like molecules	Glycerophospholipids	609.653	521.455	318.147	862.248	759.361	388.442	41.3413	322.133	386.793	5.77917	379.614	432.415	305.81	117.99	210.523	211.121	91.6342	341.258	10.4878	25.4326	14.892	20.3468	17.2393	6.09296	3.01162e-05	1.22912	s	s	s
2.45_665.3125m/z	665.312	2.44567	neg	M+Cl	C33H50N4O6S	-3.2112	70.3115	100 - 38.8 - 13.1 - 3.09 - 0.57	HMDB0014357	Remikiren	Organic compounds	Organic acids and derivatives	Carboxylic acids and derivatives	770.847	539.335	442.418	817.352	545.303	422.175	35.2452	385.368	498.312	11.9937	353.746	417.797	309.506	157.437	363.362	315.252	139.078	374.14	22.2464	44.4362	10.4704	11.0787	17.9583	6.33295	1.49843e-05	1.22211	s	s	s
2.39_623.2889m/z	623.289	2.38853	neg	2M+FA-H	C15H19N3O3	9.4218	84.0139	100 - 17.7 - 2.08 - 0.185	HMDB0061151	Hydroxylated N-acetyl desmethyl frovatriptan	Organic compounds	Organoheterocyclic compounds	Indoles and derivatives	620.741	627.083	546.054	670.805	702.444	634.253	42.038	536.581	580.768	21.4269	618.33	663.053	420.408	221.505	435.766	543.067	255.755	556.479	26.5334	60.4636	32.4614	30.914	28.277	18.8814	4.94529e-05	1.21988	s	s	s
0.60_234.0510n	215.033	0.596283	neg	M-H2O-H, M-H	C12H10O5	-7.93319	89.9785	100 - 13.3 - 1.84 - 0.166	HMDB0136751	4-(hydroxymethyl)-2-oxo-2H-chromen-7-yl acetate	Organic compounds	Phenylpropanoids and polyketides	Coumarins and derivatives	329.601	315.671	420.915	326.749	354.973	474.647	818.224	579.414	448.13	985.45	783.951	631.265	448.222	479.841	462.855	657.301	649.349	636.667	695.968	744.857	1183.8	1001.57	1114.45	1608.88	7.66263e-05	1.21763	s	s	s
4.25_574.3124n	595.287	4.24507	neg	M+Na-2H, M+FA-H	C32H46O9	-3.17313	91.5905	100 - 35.5 - 7.96 - 1.33 - 0.183	HMDB0035986	Ganoderic acid K	Organic compounds	Lipids and lipid-like molecules	Prenol lipids	79.511	233.897	282.663	56.5482	172.434	252.095	1059.1	704.385	740.251	847.991	729.838	624.888	366.919	367.631	296.883	286.558	279.098	222.552	1117.82	1106.75	966.134	1137.17	1089.92	835.621	2.52921e-11	1.21459	s	s	s
2.54_613.3535m/z	613.354	2.53782	neg	M+Na-2H	C37H52O6	4.20444	47.233	100 - 40.8 - 9.36 - 1.55 - 0.205	HMDB0035266	Avenestergenin B2	Organic compounds	Lipids and lipid-like molecules	Prenol lipids	855.216	709.066	492.962	1008.54	633.492	465.02	119.8	396.647	514.78	106.432	316.01	456.586	351.386	186.553	382.96	372.843	135.741	342.255	106.305	125.607	167.208	129.401	102.426	109.14	1.42264e-05	1.21327	s	s	s
2.45_1040.5715m/z	1040.57	2.45282	neg	M-H2O-H	C52H91N3O15P2	-3.01962	69.0837	100 - 59 - 20.2 - 5.05 - 1.02 - 0.175	HMDB0006984	CDP-DG(18:0/22:3(10Z,13Z,16Z))	Organic compounds	Lipids and lipid-like molecules	Glycerophospholipids	569.996	659.889	655.389	651.948	664.337	696.391	52.6986	637.685	924.67	28.4611	768.355	1013.68	504.659	258.868	434.743	698.72	235.325	505.967	35.6867	57.607	13.9385	13.4158	53.1095	6.20313	0.000836093	1.20886	s	s	s
0.51_694.2411m/z	694.241	0.511267	neg	M+Na-2H	C28H43N5O12S	5.29836	94.2328	100 - 33.9 - 12.5 - 2.92 - 0.582	HMDB0039640	Ustiloxin A	Organic compounds	Organic acids and derivatives	Carboxylic acids and derivatives	392.302	484.599	564.415	421.867	495.53	675.236	1054.85	631.987	479.358	1263.04	771.366	570.606	589.784	721.862	693.269	736.427	879.704	742.503	792.782	936.93	1437.31	1028.66	1224.99	1575.22	0.000599639	1.20536	s	s	s
2.19_515.2679m/z	515.268	2.18993	neg	M-H2O-H	C29H42O9	5.39002	51.5687	100 - 32.2 - 6.86 - 1.1 - 0.144	HMDB0033846	Corchoroside A	Organic compounds	Lipids and lipid-like molecules	Steroids and steroid derivatives	1281.31	882.811	616.529	1440	879.408	680.974	142.58	632.083	576.438	87.5109	667.945	620.891	690.127	558.228	809.964	659.279	399.859	882.796	192.964	340.36	233.737	124.481	305.302	139.298	0.000174631	1.20526	s	s	s
2.57_777.4046m/z	777.405	2.57353	neg	M-H2O-H	C43H60N2O12	9.76695	88.7911	100 - 48.4 - 13.9 - 2.96 - 0.51	HMDB0030465	Mocimycin	Organic compounds	Organooxygen compounds	Carbohydrates and carbohydrate conjugates	730.79	585.677	504.687	897.832	635.943	399.482	18.6063	512.385	543.224	2.75783	483.781	510.969	404.964	187.032	430.593	429.067	129.207	468.159	39.4303	74.1174	30.0209	21.319	52.0908	15.4706	0.000130568	1.20337	s	s	s
2.27_669.4102m/z	669.41	2.2678	neg	2M+FA-H	C16H28N2O4	3.51304	51.2745	100 - 18.5 - 2.44 - 0.241	HMDB0014343	Oseltamivir	Organic compounds	Organic acids and derivatives	Carboxylic acids and derivatives	679.852	594.223	323.411	679.86	625.057	368.6	89.8938	450.674	365.203	81.3618	436.627	360.979	269.303	173.068	348.892	263.239	93.0761	250.927	51.7823	72.8064	53.3857	34.8291	77.932	29.6518	1.44525e-05	1.18507	s	s	s
5.03_339.2303m/z	339.23	5.02797	neg	M-H	C23H32O2	-7.73419	93.5292	100 - 25.3 - 3.48 - 0.341	HMDB0033786	Plastoquinone 3	Organic compounds	Lipids and lipid-like molecules	Prenol lipids	261.971	524.222	323.015	309.555	546.664	355.339	550.508	576.683	878.426	579.27	534.593	967.59	797.11	1059.12	524.557	860.409	1099.55	558.924	935.856	828.625	853.74	940.994	1005.94	862.098	0.000191219	1.17778	s	s	s
4.66_462.2977m/z	462.298	4.65793	neg	M-H2O-H	C23H48NO7P	-2.71846	91.4152	100 - 26.1 - 4.7 - 0.635	HMDB0011129	LysoPE(0:0/18:0)	Organic compounds	Lipids and lipid-like molecules	Glycerophospholipids	1130.71	2903.92	3136.48	1051.52	3054.6	3141.36	3571.31	2549.98	2947.41	3440.84	2796.83	2838.22	4186.63	5639.36	3260.55	4840.64	5808.32	3942.62	3039.18	2725.85	3146.75	3060.66	2783.83	3314.2	0.000403671	1.16987	s	s	s
2.32_990.5588m/z	990.559	2.3178	neg	M-H2O-H	C48H89N3O15P2	-0.297357	78.7464	100 - 54.6 - 17.7 - 4.24 - 0.824 - 0.136	HMDB0116354	CDP-DG(i-24:0/i-12:0)	Organic compounds	Lipids and lipid-like molecules	Glycerophospholipids	1456.19	694.757	368.624	1424.62	793.19	417.883	127.933	490.249	358.321	153.774	518.107	418.568	305.874	689.473	790.45	329.876	759.02	816.972	73.382	190.56	74.1838	64.0062	175.381	31.45	0.000936081	1.16815	s	s	s
2.25_1232.5629m/z	1232.56	2.24637	neg	3M-H	C20H29NO8	1.79688	57.3668	100 - 22.6 - 4.09 - 0.539	HMDB0061172	O-Desmethylvenlafaxine glucuronide	Organic compounds	Organic oxygen compounds	Organooxygen compounds	1047.45	726.35	298.613	866.51	685.164	270.879	86.5222	424.598	380.883	53.5656	297.531	277.059	361.42	349.18	442.827	291.183	310.621	337.392	62.8323	92.3177	48.2836	48.1648	44.4101	14.5592	9.65119e-05	1.16333	s	s	s
2.65_289.1003m/z	289.1	2.65212	neg	M+Cl	C17H18O2	0.899813	95.5317	100 - 18.7 - 2.05 - 0.167	HMDB0032349	Isoeugenyl benzyl ether	Organic compounds	Benzenoids	Benzene and substituted derivatives	314.551	380.487	393.548	481.821	471.905	435.924	724.676	557.837	337.142	830.904	681.15	403.159	489.694	584.684	612.624	559.704	690.165	817.31	639.493	793.514	1233.78	730.155	982.729	1447.79	0.00074825	1.15933	s	s	s
2.17_1073.5080m/z	1073.51	2.1685	neg	M+FA-H	C51H80O21	-9.14408	66.1781	100 - 56.9 - 20.2 - 5.35 - 1.16 - 0.216	HMDB0038316	Pisumsaponin I	Organic compounds	Lipids and lipid-like molecules	Prenol lipids	688.321	375.943	401.362	777.345	401.479	526.811	133.354	269.362	324.576	144.164	372.987	406.046	180.354	58.85	222.636	317.903	22.7319	280.567	79.6015	25.6114	47.7551	103.294	30.2423	58.5834	1.07444e-05	1.15863	s	s	s
2.47_951.5830m/z	951.583	2.4671	neg	M+Cl	C49H88O15	1.41866	92.6578	100 - 54.6 - 17.7 - 4.24 - 0.823 - 0.136	HMDB0041511	Glycerol 2-(9Z,12Z-octadecadienoate) 1-hexadecanoate 3-O-[alpha-D-galactopyranosyl-(1->6)-beta-D-galactopyranoside]	Organic compounds	Lipids and lipid-like molecules	Glycerolipids	1146	445.966	248.665	1248.26	470.012	239.992	16.1945	133.006	186.547	8.15581	103.792	125.859	98.7092	45.4887	171.042	117.434	58.6702	171.624	16.965	11.8706	0	9.06694	5.8323	1.93535	0.00046816	1.15686	s	s	s
2.21_665.3191m/z	665.319	2.21067	neg	M+Na-2H	C32H52O13	5.6112	72.8909	100 - 35.7 - 8.86 - 1.65 - 0.254	HMDB0038376	Goshonoside F3	Organic compounds	Lipids and lipid-like molecules	Prenol lipids	1146.31	524.98	274.51	1259.32	505.937	312.188	9.0392	362.176	308.232	5.46206	367.088	281.198	334.374	195.275	402.472	308.709	98.3831	464.684	15.9605	58.3438	33.4008	21.6786	74.5214	16.4826	0.00156425	1.14457	s	s	s
0.80_330.0735m/z	330.074	0.795583	pos	M+H-2H2O	C12H19N3O8S	-5.2916	93.6602	100 - 15.4 - 7.27 - 0.962 - 0.172	HMDB0062198	2-S-glutathionyl acetate	Organic compounds	Organic acids and derivatives	Carboxylic acids and derivatives	388.833	742.655	838.602	442.586	1059.57	1116.2	1592.76	1095.59	1448.21	1626.82	1499.36	1811.81	1325.45	1635.7	2829.59	1290.23	1720.8	1262.76	1482.71	1416.17	1203.22	1766.02	1558.74	1444.1	0.00170106	1.13354	s	s	s
2.54_727.4028m/z	727.403	2.54497	neg	2M-H	C24H28O3	3.32308	56.9309	100 - 26.4 - 3.96 - 0.433	HMDB0030730	3-(1,1-Dimethyl-2-propenyl)-8-(3-methyl-2-butenyl)xanthyletin	Organic compounds	Phenylpropanoids and polyketides	Coumarins and derivatives	601.593	488.316	356.762	631.16	471.162	305.708	25.5453	337.057	464.613	17.3465	353.563	362.196	237.05	58.4564	210.002	274	60.5531	210.925	19.8977	23.826	11.9664	26.1521	25.6934	18.0478	3.67637e-05	1.12891	s	s	s
2.12_591.2469m/z	591.247	2.1185	neg	M+Na-2H	C34H38N2O6	-1.33222	84.9378	100 - 38.2 - 8.32 - 1.32 - 0.168	HMDB0040522	Dipiperamide E	Organic compounds	Organoheterocyclic compounds	Benzodioxoles	885.828	1017.84	499.915	1034.68	1044.8	585.188	255.371	607.396	435.941	201.525	705.069	559.281	467.301	479.71	547.673	557.017	403.201	623.834	186.046	278.816	376.112	187.406	329.905	402.786	0.000152621	1.12003	s	s	s
2.31_479.2045m/z	479.204	2.31067	neg	M+Na-2H	C26H34O7	-1.37296	88.2283	100 - 28.8 - 5.43 - 0.768	HMDB0134763	6-hydroxy-6-(hydroxymethyl)-1,1,4a-trimethyl-5-{[(2-oxo-2H-chromen-7-yl)oxy]methyl}-decahydronaphthalen-2-yl acetate	Organic compounds	Phenylpropanoids and polyketides	Coumarins and derivatives	865.852	785.162	491.727	882.996	870.26	619.64	156.099	519.364	423.558	154.102	552.215	495.705	511.194	348.786	598.676	545.888	308.578	589.141	159.116	229.504	262.023	127.339	239.074	192.944	1.29063e-05	1.11989	s	s	s
2.21_508.2473n	507.24	2.21067	neg	M-H, M+Na-2H	C23H36N6O5S	0.940061	70.6358	100 - 28.5 - 9.46 - 1.89 - 0.301	HMDB0014423	Argatroban	Organic compounds	Organic acids and derivatives	Carboxylic acids and derivatives	1342.19	783.569	731.272	1497.49	812.342	846.196	178.013	619.18	555.995	159.851	694.762	651.694	769.337	554.702	977.509	727.457	531.954	975.471	241.451	379.137	293.086	229.175	371.858	233.079	0.00016154	1.11677	s	s	s
2.42_577.2975m/z	577.298	2.42423	neg	M+FA-H	C30H44O8	-8.06279	70.3267	100 - 33.3 - 7 - 1.1 - 0.141	HMDB0035985	Ganoderic acid G	Organic compounds	Lipids and lipid-like molecules	Prenol lipids	613.537	545.485	464.739	708.308	618.573	458.387	30.7453	388.687	469.335	1.70893	423.319	496.09	348.357	241.829	449.793	439.614	200.189	534.5	43.1102	82.3873	19.7238	15.3862	21.8556	11.8259	2.17546e-05	1.11545	s	s	s
2.39_277.1546m/z	277.155	2.38853	neg	M-H	C15H22N2O3	-4.32507	94.7535	100 - 17.3 - 2.03 - 0.178	HMDB0028998	Phenylalanyl-Isoleucine	Organic compounds	Organic acids and derivatives	Carboxylic acids and derivatives	1451.12	459.42	413.185	1824.05	570.053	503.241	150.725	352.711	562.758	135.871	463.346	760.777	411.411	551.691	550.808	545.78	636.227	717.343	157.587	173.437	112.44	172.777	205.42	110.049	0.0103512	1.11141	s	s	s
2.07_706.5125m/z	706.513	2.06852	pos	M+H-2H2O	C41H76NO8P	-6.0329	62.3373	100 - 45.9 - 11.9 - 2.26 - 0.341	HMDB0114296	PE-NMe2(20:3(8Z,11Z,14Z)/14:0)	Organic compounds	Lipids and lipid-like molecules	Glycerophospholipids	160.663	735.153	729.642	61.1961	1076.12	1097.42	1166.29	915.761	876.198	1077.03	1077.75	993.283	1332.16	1254.74	821.478	1097.43	1224.17	1296.89	1219.81	1319.52	1032.55	1118.94	1262.74	1170.02	0.00428452	1.11132	s	s	s
5.16_393.1696m/z	393.17	5.15583	neg	M+Na-2H	C22H28O5	3.48428	84.8101	100 - 24.3 - 3.85 - 0.458	HMDB0041330	Tanabalin	Organic compounds	Lipids and lipid-like molecules	Prenol lipids	165.139	173.927	247.353	255.369	225.222	265.037	754.078	236.95	516.77	507.163	281.808	564.971	3285.75	692.741	481.551	4371.04	911.545	522.019	545.972	817.013	793.2	539.95	838.609	1047.31	0.034737	1.10174	s	s	s
4.50_621.3026m/z	621.303	4.5015	neg	M+Na-2H	C27H53O12P	0.81148	93.1053	100 - 30.3 - 6.89 - 1.16 - 0.165	HMDB0240261	LysoPI(18:0/0:0)	Organic compounds	Lipids and lipid-like molecules	Glycerophospholipids	16.161	83.9147	104.432	21.6055	57.5818	97.9909	1100.8	880.682	817.397	1004.96	931.26	746.313	68.8029	62.4573	56.2797	30.2017	46.7613	53.3012	1240.88	1119.93	990.356	1100.69	1088.45	982.356	2.74675e-16	1.10135	s	s	s
2.37_344.1271m/z	344.127	2.37423	neg	M+Na-2H	C20H21NO3	0.832915	97.6416	100 - 22.4 - 3 - 0.298	HMDB0030212	Mukonicine	Organic compounds	Organoheterocyclic compounds	Indoles and derivatives	712.179	858.638	586.246	839.259	1007.8	682.26	491.605	714.009	650.772	448.577	888.608	767.435	507.735	567.797	467.449	646.918	531.885	530.733	320.963	362.925	429.44	314.37	345.939	435.622	6.14838e-05	1.10103	s	s	s
2.18_461.2231m/z	461.223	2.17565	neg	3M-H	C12H10	-9.56586	53.2894	100 - 13.1 - 0.787	HMDB0034968	Capillene	Organic compounds	Benzenoids	Benzene and substituted derivatives	474.949	1014.07	793.052	557.837	1069.6	863.631	614.663	859.034	393.842	557.034	962.39	430.041	681	155.419	534.118	739.837	135.998	607.272	276.576	393.348	224.253	253.593	399.765	244.858	0.0048585	1.0949	s	s	s
4.57_566.3455m/z	566.345	4.56508	neg	M+FA-H	C26H52NO7P	-1.67039	97.6266	100 - 29.4 - 5.59 - 0.799	HMDB0062651	2-oleoyl-sn-glycero-3-phosphocholine	Organic compounds	Lipids and lipid-like molecules	Glycerophospholipids	2834.73	5669.93	6061.03	2915.6	5823.61	6356.89	3983.21	2986.63	2784.3	3886.22	3295.1	2561.76	7485.85	9964.85	7338.35	8334.1	9962.1	8568.59	4022.12	4232.52	5677.25	3966.77	4178.65	5991.52	6.64934e-07	1.08892	s	s	s
2.79_881.4729m/z	881.473	2.79427	neg	3M-H	C15H22N2O4	7.11748	72.3813	100 - 17.4 - 2.24 - 0.215	HMDB0033464	Sinapoylputrescine	Organic compounds	Phenylpropanoids and polyketides	Cinnamic acids and derivatives	225.952	1015.72	788.373	246.027	1190.11	701.453	95.5848	690.28	548.085	42.4042	823.973	384.687	781.371	271.665	509.131	684.35	171.368	427.387	124.169	108.847	34.8932	81.2001	81.2601	9.19188	0.00889544	1.08347	s	s	s
0.62_192.0260n	191.019	0.62485	neg	M-H2O-H, M-H	C6H8O7	-5.16041	98.1003	100 - 6.85 - 1.64 - 0.101	HMDB0041862	D-Glucaro-1,4-lactone	Organic compounds	Organoheterocyclic compounds	Lactones	251.6	333.755	597.724	258.4	439.877	771.916	1005.4	612.634	687.279	1277.39	805.604	952.865	819.73	1014.07	654.661	1026.59	1463.72	937.221	1269.6	866.949	450.515	1809.06	1346.54	598.385	0.018723	1.08202	s	s	s
2.41_804.1649n	769.151	2.40997	pos	M+H-2H2O, M+ACN+H	C36H36O19S	9.62942	61.3668	100 - 40.9 - 16.6 - 4.46 - 1.04 - 0.202	HMDB0126846	{2-[2-(3,4-dihydroxyphenyl)-3,5,7-trihydroxy-4-[3,5,7-trihydroxy-2-(3-hydroxyphenyl)-3,4-dihydro-2H-1-benzopyran-8-yl]-3,4-dihydro-2H-1-benzopyran-8-yl]-4,5-dihydroxy-6-(hydroxymethyl)oxan-3-yl}oxidanesulfonic acid	Organic compounds	Phenylpropanoids and polyketides	Flavonoids	609.753	624.537	548.275	1000.42	1126.91	960.585	427.556	870.097	1075.09	522.221	1231.72	1223.01	909.61	887.763	592.829	895.737	1032.77	823.145	225.719	379.645	244.621	202.158	257.832	110.054	0.000185873	1.07711	s	s	s
3.58_448.3050m/z	448.305	3.57645	neg	M-H	C26H43NO5	-4.18238	93.406	100 - 29.2 - 5.13 - 0.67	HMDB0006898	Chenodeoxyglycocholic acid	Organic compounds	Lipids and lipid-like molecules	Steroids and steroid derivatives	268.889	317.448	398.801	297.749	344.36	473.36	653.214	414.285	311.157	699.371	469.942	334.302	425.657	571.17	532.039	527.27	641.401	645.024	533.514	606.864	955.643	672.36	789.081	1243.47	0.00109558	1.07681	s	s	s
0.50_439.2152m/z	439.215	0.496983	pos	M+H	C26H30O6	8.29934	86.7046	100 - 28.7 - 5.2 - 0.705	HMDB0040613	Kanzonol G	Organic compounds	Phenylpropanoids and polyketides	Isoflavonoids	194.896	219.074	299.073	252.746	293.989	389.279	598.55	314.188	263.473	706.12	456.261	333.169	363.393	436.956	617.637	450.049	537.537	459.884	532.004	635.748	931.956	573.346	672.125	1015.34	0.000304487	1.06421	s	s	s
2.06_988.3139m/z	988.314	2.06138	pos	M+Na	C36H59N3O27	-9.18901	63.7812	100 - 41.7 - 14 - 3.44 - 0.728 - 0.132	HMDB0006588	Disialosyl galactosyl globoside	Organic compounds	Organic oxygen compounds	Organooxygen compounds	171.104	761.117	818.645	63.0746	1067.55	1066.42	1119.2	911.414	865.901	1166.3	1118.51	929.26	1286.68	1159.09	858.957	1322.88	1154.22	1239.31	1135.13	1344.94	1049.88	1117.19	1223.15	1116.97	0.00595464	1.06296	s	s	s
2.58_502.2674m/z	502.267	2.58068	neg	M+Cl	C22H46NO7P	-6.9122	58.1378	100 - 25 - 4.42 - 0.586	HMDB0061691	1-Heptadecanoylglycerophosphoethanolamine	Organic compounds	Lipids and lipid-like molecules	Glycerophospholipids	614.948	564.441	376.894	769.744	598.076	376.669	80.5211	438.181	476.413	54.4667	396.285	475.857	417.325	230.629	382.973	395.454	196.482	428.734	66.9168	111.443	82.4823	68.7765	100.348	59.8459	9.82895e-05	1.06065	s	s	s
2.18_615.3451m/z	615.345	2.1828	neg	M+Na-2H	C40H50O4	-0.785217	86.7158	100 - 44 - 10.3 - 1.68 - 0.214	HMDB0036872	7,8-Dehydroastaxanthianthin	Organic compounds	Lipids and lipid-like molecules	Prenol lipids	569.98	458.625	291.012	604.286	479.961	335.155	112.258	387.556	328.534	112.457	378.023	374.905	233.352	146.272	322.62	266.189	141.64	295.232	59.229	72.4782	54.3066	37.4254	91.4506	45.6644	1.40738e-05	1.06023	s	s	s
2.40_579.2492m/z	579.249	2.39567	neg	2M+FA-H	C17H17NO2	-1.67953	65.0895	100 - 19 - 2.12 - 0.174	HMDB0014852	Apomorphine	Organic compounds	Alkaloids and derivatives	Aporphines	657.463	1045.52	1035.93	737.454	1124.44	1120.61	465.801	885.994	733.585	396.892	1039.72	727.397	716.926	280.033	905.314	1061.96	330.042	1073.89	360.596	413.963	313.311	414.268	411.414	357.913	0.00460287	1.05811	s	s	s
2.32_1109.5278m/z	1109.53	2.32495	neg	M+Cl	C53H86O22	-2.44522	77.229	100 - 59.2 - 21.7 - 5.94 - 1.33 - 0.255	HMDB0031965	Melilotussaponin O1	Organic compounds	Lipids and lipid-like molecules	Prenol lipids	518.389	460.861	216.553	547.052	498.486	207.909	90.8612	322.543	260.08	56.1877	332.964	228.215	184.983	138.786	205.262	171.206	65.2742	204.857	48.7125	49.7325	9.11814	20.1298	12.3096	2.35203	2.46199e-05	1.04715	s	s	s
2.23_575.2892m/z	575.289	2.23208	neg	M+FA-H	C30H42O8	5.66151	66.3979	100 - 33.2 - 6.99 - 1.1 - 0.141	HMDB0035325	Ganoderic acid N	Organic compounds	Lipids and lipid-like molecules	Prenol lipids	573.797	367.799	281.596	605.192	410.961	308.663	13.9386	298.282	255.422	9.27251	308.131	314.864	210.617	97.7794	273.171	211.08	38.1603	226.109	6.83032	26.5632	8.06945	7.83229	23.0688	10.4599	3.39341e-05	1.04586	s	s	s
2.10_563.2535n	562.246	2.10422	neg	M-H, M+Na-2H	C32H37NO8	2.80405	69.9737	100 - 35.7 - 7.83 - 1.28 - 0.17	HMDB0060808	Alpha-Hydroxy-tamoxifen-O-glucuronide	Organic compounds	Phenylpropanoids and polyketides	Stilbenes	1781.19	1276.15	1247.54	1875.85	1287.57	1395.73	341.837	1112.62	756.461	311.259	1253.53	847.796	1137.55	805.468	1584.01	1378.43	751.714	1819.74	520.402	775.094	551.257	534.138	907.587	583.595	0.000774635	1.04336	s	s	s
2.69_523.2928n	504.275	2.68782	neg	M-H2O-H, M+Na-2H	C24H46NO9P	3.43063	87.6245	100 - 27.2 - 5.41 - 0.8	HMDB0061694	1-Oleoylglycerophosphoserine	Organic compounds	Lipids and lipid-like molecules	Glycerophospholipids	772.197	424.048	386.695	1020.17	476.49	339.292	6.0726	335.251	401.335	6.30643	292.62	330.822	460.035	227.874	417.883	352.729	183.993	460.331	36.0943	79.7141	35.38	18.0307	32.5059	7.21355	0.00027182	1.04201	s	s	s
2.15_662.2882m/z	662.288	2.15422	neg	M+Cl	C34H41N7O5	3.0476	62.0389	100 - 40 - 8.82 - 1.4 - 0.175	HMDB0015641	Dabigatran etexilate	Organic compounds	Organoheterocyclic compounds	Benzimidazoles	694.137	479.228	283.09	821.902	454.456	308.423	50.356	272.728	241.01	43.9465	352.352	295.052	220.623	221.805	282.733	282.519	135.662	328.857	40.8851	75.6324	97.2337	8.51267	49.4607	81.0222	9.16142e-05	1.0304	s	s	s
0.76_564.2879m/z	564.288	0.759867	neg	M+Cl	C27H48NO7P	3.13637	76.0338	100 - 30.4 - 5.9 - 0.857 - 0.101	HMDB0011523	LysoPE(22:4(7Z,10Z,13Z,16Z)/0:0)	Organic compounds	Lipids and lipid-like molecules	Glycerophospholipids	1308.6	711.754	479.725	1372.7	692.936	443.363	169.587	259.156	92.251	192.003	573.722	37.0889	117.04	362	890.386	126.015	471.28	920.885	109.433	326.997	199.922	58.5356	121.148	204.719	0.00282373	1.02889	s	s	s
4.14_397.3198n	398.327	4.13865	pos	M+H, M+Na	C23H43NO4	1.57631	96.6928	100 - 25.9 - 4.04 - 0.468	HMDB0006317	trans-Hexadec-2-enoyl carnitine	Organic compounds	Lipids and lipid-like molecules	Fatty Acyls	194.29	143.48	360.041	294.835	218.879	538.993	607.108	525.067	628.864	764.654	685.277	936.361	1238.17	1148.4	1085.24	1387.33	1413.39	1482.88	645.253	789.021	473.59	769.095	961.782	538.536	9.33931e-09	1.02761	s	s	s
2.27_416.1937m/z	416.194	2.27495	neg	M-H2O-H	C25H29N3O4	-9.8686	76.3468	100 - 28.6 - 4.77 - 0.584	HMDB0033451	Cadabicine	Organic compounds	Organic oxygen compounds	Organooxygen compounds	1030.97	871.523	743.483	1137.32	986.639	893.697	351.386	740.695	527.547	342.515	831.535	602.659	727.853	497.842	1012.45	875.746	518.366	1169.53	288.379	366.676	335.421	328.715	443.035	313.464	8.54442e-05	1.02119	s	s	s
2.27_432.2914n	413.274	2.2678	neg	M-H2O-H, 2M+FA-H	C26H40O5	8.73966	94.0388	100 - 28.8 - 5.01 - 0.65	HMDB0014792	Latanoprost	Organic compounds	Lipids and lipid-like molecules	Fatty Acyls	1079.66	979.325	778.207	1176.84	1040.39	907.499	346.347	921.996	517.517	362.155	910.46	578.228	813.358	554.817	1252.62	788.211	472.471	1278.5	313.309	427.673	346.789	325.375	499.34	271.962	0.000573709	1.01936	s	s	s
2.29_843.4861m/z	843.486	2.28923	neg	M+Cl	C41H77O13P	8.04902	87.9034	100 - 45.7 - 12.9 - 2.71 - 0.463	HMDB0009797	PI(16:1(9Z)/16:0)	Organic compounds	Lipids and lipid-like molecules	Glycerophospholipids	384.321	500.044	279.258	392.222	535.192	353.757	65.471	414.107	385.706	86.2188	420.228	430.302	327.558	199.706	251.28	272.378	122.246	267.594	36.9673	37.8595	14.4067	31.718	52.5179	26.5075	5.31131e-05	1.01321	s	s	s
2.51_847.4519m/z	847.452	2.50997	pos	M+K	C39H72N2O15	-5.59571	64.8089	100 - 44.3 - 12.7 - 2.71 - 0.478	HMDB0060845	N-Monodemethyl roxithromycin	Organic compounds	Organic oxygen compounds	Organooxygen compounds	729.861	456.405	304.41	762.234	433.399	315.77	248.939	281.559	281.341	163.355	223.758	166.876	298.346	272.644	122.414	136.633	122.275	148.41	113.542	109.292	62.7164	106.886	47.3024	217.703	5.55314e-05	1.00522	s	s	s
7.68_740.5208m/z	740.521	7.68098	neg	M-2H	C83H152O17P2	3.77778	48.0097	100 - 92.2 - 45.5 - 15.8 - 4.33 - 0.986 - 0.194	HMDB0058366	CL(18:1(9Z)/18:0/20:4(5Z,8Z,11Z,14Z)/18:0)	Organic compounds	Lipids and lipid-like molecules	Glycerophospholipids	379.488	482.889	497.061	302.47	254.706	356.573	2665.16	1562.58	2722.83	1877.89	1059.68	1961.87	645.998	692.01	440.172	481.824	449.394	356.466	2558.02	1628.42	1471.88	1954.8	1398.54	1258.41	7.73849e-07	1.00472	s	s	s
4.90_636.3478m/z	636.348	4.89938	neg	M-H2O-H	C30H51N6O10+	-1.57284	89.2198	100 - 35.6 - 8.21 - 1.42 - 0.201	HMDB0040704	Allodesmosine	Organic compounds	Organic acids and derivatives	Carboxylic acids and derivatives	80.5088	347.257	430.838	96.1127	348.92	383.936	761.024	378.529	395.606	763.475	395.213	434.773	332.497	593.845	300.233	322.874	594.383	321.061	688.781	701.153	881.768	729.343	734.981	880.407	0.000107426	1.00431	s	s	s
2.50_353.0481m/z	353.048	2.50282	neg	M+Na-2H	C13H16O10	-2.66537	91.3763	100 - 14.6 - 3.05 - 0.341	HMDB0039286	1-O-Galloylfructose	Organic compounds	Benzenoids	Benzene and substituted derivatives	54264.7	53120.8	58721.3	65089	63869.4	73096.3	57554.6	57021.4	44512.3	62094.8	80973.6	59989	53329.9	63902.7	69011	84867.8	86089.3	103760	49354.5	57219	56037.3	66129.4	80199.7	78338.6	0.144912	2.60404		s
0.57_342.1171n	365.106	0.567717	pos	M+Na, M+K	C12H22O11	2.69625	98.2439	100 - 13.7 - 3.12 - 0.341	HMDB0133305	6-({[3,4,5-trihydroxy-6-(hydroxymethyl)oxan-2-yl]oxy}methyl)oxane-2,3,4,5-tetrol				29990	38379.3	43112.3	49557.8	60991.4	73083.4	47782.2	44478.5	40110.5	55679	63906.5	56806.8	57114.2	57960.5	81855.2	58091.9	68964.9	64966.8	49110.6	53924.9	48246.9	51319.5	54694.7	49243.9	0.0587674	1.76749		s
0.54_606.0734m/z	606.073	0.539133	neg	M-H	C17H27N3O17P2	-1.45147	98.0677	100 - 20.4 - 5.48 - 0.835 - 0.132	HMDB0062760	UDP-N-acetyl-alpha-D-glucosamine(2-)	Organic compounds	Nucleosides, nucleotides, and analogues	Pyrimidine nucleotides	5277.24	7228.3	7096.42	5776.2	9360.53	9692.74	9980.21	9080.12	7535.97	12793.5	13688.8	11782.2	6740.61	6805.47	7210.13	10001.2	11232.6	10804.6	7518.27	8400.64	8522.9	12097.2	13890	12343.6	0.0569517	1.6353		s
0.82_426.0207m/z	426.021	0.817	neg	M-H	C10H15N5O10P2	-3.37305	88.4598	100 - 13.2 - 2.86 - 0.301	HMDB0000061	Adenosine 3',5'-diphosphate	Organic compounds	Nucleosides, nucleotides, and analogues	Purine nucleotides	2445.2	4639.11	3951.64	2482.8	5924.71	5307.11	4909.12	4165.86	4444.8	6407.35	6529.66	6602.88	4242.04	6131.15	4405.29	6671.77	8782.93	6286.86	4311.72	4733.73	4586.59	6225.19	7138.3	6695.51	0.114222	1.47791		s
6.76_776.5796m/z	776.58	6.76313	pos	M+CH3OH+H	C41H78NO8P	-0.506833	81.5358	100 - 45.9 - 11.9 - 2.26 - 0.342	HMDB0114239	PE-NMe2(20:2(11Z,14Z)/14:0)	Organic compounds	Lipids and lipid-like molecules	Glycerophospholipids	261.99	1108.45	1071.59	239.293	1228.17	1179.41	1740.74	815.664	1905.38	1953.31	1033.35	2124.26	2430.31	2252.35	624.383	3166.53	2756.21	696.509	2558.57	1190.09	1260.68	2608.61	1409.39	1408.16	0.0693647	1.22549		s
1.29_187.0644n	188.072	1.29347	pos	M+H, M+NH4	C11H9NO2	5.66712	97.9347	100 - 12.4 - 1.12	HMDB0000734	Indoleacrylic acid	Organic compounds	Organoheterocyclic compounds	Indoles and derivatives	2013.14	2487.21	2545.54	3151	3991.98	4132.65	3292.05	2987.47	2879.98	4050.03	4109.99	4025.45	3521.62	3802.22	3912.84	4104.74	4154.73	4389.4	3360.28	3659.98	4055.55	3459.97	3815.62	4269.98	0.0569764	1.12285		s
0.60_377.2361m/z	377.236	0.603417	neg	M+FA-H	C21H32O3	8.35991	78.9252	100 - 23.2 - 3.18 - 0.323	HMDB0060424	7alpha-Hydroxypregnenolone	Organic compounds	Lipids and lipid-like molecules	Steroids and steroid derivatives	2653.53	2176.1	1886.29	2899.92	2518.51	3165.17	2098.97	1323.11	1517.15	1457.4	3399	2464.09	1654.53	781.377	2792.15	2327.39	2992.14	2696.41	1481.97	2201.05	1682.15	1783.43	1971.79	1237.29	0.202866	1.02137		s
2.14_625.2826m/z	625.283	2.13993	neg	M+Cl	C33H42N4O6	4.59748	95.0774	100 - 37.9 - 8.21 - 1.3 - 0.164	HMDB0004158	D-Urobilinogen	Organic compounds	Organoheterocyclic compounds	Tetrapyrroles and derivatives	676.696	427.286	232.764	747.766	446.308	254.966	48.3862	212.803	191.487	35.1257	257.145	225.243	205.95	89.7653	219.938	197.725	62.068	317.086	33.1723	64.0754	30.9783	40.1873	72.6335	29.3658	0.000100145	0.992026	s
2.18_724.3674m/z	724.367	2.17567	pos	M+2Na	C60H102N22O15S	-3.67963	51.6003	100 - 75.5 - 35.7 - 12.6 - 3.56 - 0.846 - 0.173	HMDB0060264	Apelin (1-12)	Organic compounds	Organic acids and derivatives	Carboxylic acids and derivatives	457.319	439.267	308.512	415.416	444.197	155.087	136.081	367.999	225.753	186.161	255.461	132.404	216.405	163.839	49.8696	95.003	87.0649	191.848	51.0381	75.2945	37.3946	25.8863	55.2905	29.2099	9.13112e-06	0.991351	s
2.19_621.2999m/z	621.3	2.18993	neg	M-H	C38H42N2O6	4.59217	73.166	100 - 42.5 - 10.1 - 1.71 - 0.232	HMDB0030174	Isotetrandrine	Organic compounds	Organoheterocyclic compounds	Isoquinolines and derivatives	545.661	436.812	352.001	577.978	474.981	412.441	65.3439	396.542	333.357	48.7831	444.645	421.793	322.731	232.906	362.833	420.204	180.675	398.757	54.7159	83.3784	46.1238	34.1971	75.3077	42.4353	3.62223e-05	0.989284	s
4.58_436.2823m/z	436.282	4.57937	neg	M-H	C21H44NO6P	-2.44689	96.8276	100 - 23.8 - 3.94 - 0.49	HMDB0011152	PE(P-16:0e/0:0)	Organic compounds	Lipids and lipid-like molecules	Glycerophospholipids	2491.59	6661.1	6947.88	2447.92	7147.47	7334.79	7545.08	5388.45	6128.86	7653.46	6118.25	6083.03	7550.89	10259.9	6119.3	9053.14	10980.6	7535.25	5925.76	5551.8	5869.15	6389.21	5835.3	6664.57	0.0160321	0.981224	s
2.29_746.3440m/z	746.344	2.28923	neg	3M-H	C17H15NO	6.99202	67.2103	100 - 19 - 1.9 - 0.134	HMDB0038574	Lansiumamide A	Organic compounds	Phenylpropanoids and polyketides	Cinnamic acids and derivatives	431.289	394.188	277.29	452.411	428.466	293.475	30.8212	319.606	292.027	21.8129	348.001	370.596	212.646	138.865	245.62	269.189	88.1091	241.39	35.6717	45.4768	8.7697	4.26666	44.4836	5.30547	4.01666e-05	0.978329	s
2.33_435.2139m/z	435.214	2.33208	neg	M-H	C27H32O5	-8.64631	89.228	100 - 29.8 - 5.3 - 0.699	HMDB0040606	Kanzonol I	Organic compounds	Phenylpropanoids and polyketides	Isoflavonoids	1015.41	495.833	391.27	1164.18	560.199	452.336	91.5414	410.524	374.962	97.657	396.373	424.096	448.359	337.39	580.633	482.675	317.909	630.51	125.427	203.423	139.355	115.328	220.399	100.52	0.000888284	0.973863	s
6.12_278.1517n	279.16	6.11595	pos	M+H-H2O, M+H	C16H22O4	-0.322514	94.595	100 - 17.7 - 2.3 - 0.222	HMDB0013248	Monoethylhexyl phthalic acid	Organic compounds	Benzenoids	Benzene and substituted derivatives	200.351	472.221	582.359	261.313	869.771	774.426	1110.91	711.13	939.088	1273.22	887.028	1228.56	766.897	822.587	656.599	905.35	1117.56	617.208	1072.56	1051.47	1004.96	1318.85	1024.95	1095.64	0.000435367	0.973726	s
2.50_861.4412m/z	861.441	2.50283	pos	M+CH3OH+H	C41H64O17	-7.98128	63.2876	100 - 45.7 - 13.7 - 3.08 - 0.572	HMDB0034321	Digitoxigenin 3-[glucosyl-(1->6)-glucosyl-(1->4)-2,6-dideoxyribohexoside]	Organic compounds	Lipids and lipid-like molecules	Steroids and steroid derivatives	467.939	370.24	254.892	497.035	389.717	310.482	175.392	367.296	266.396	100.684	150.175	190.478	177.009	200.349	59.9787	108.784	165.498	274.159	73.7209	46.5636	18.763	75.0802	48.4412	42.4935	3.90952e-06	0.973234	s
0.78_132.0779m/z	132.078	0.7813	pos	M+Na	C7H11N	-3.89633	94.5363	100 - 8.06 - 0.283	HMDB0029722	1,2,5-Trimethyl-1H-pyrrole	Organic compounds	Organoheterocyclic compounds	Pyrroles	311.762	653.575	919.756	422.126	1147.14	1422.42	1045.6	649.82	947.175	1300.48	912.235	1359.3	1347	1585.36	1601.07	1693.09	1884.53	1320.12	1194.08	1137.74	1046.26	1478.87	1169.36	1186.02	0.00133679	0.970116	s
2.43_1271.5950m/z	1271.6	2.43138	neg	M+FA-H	C57H94O28	3.0026	64.4863	100 - 63.8 - 25.8 - 7.79 - 1.93 - 0.413	HMDB0038313	Trigoneoside XIIIa	Organic compounds	Lipids and lipid-like molecules	Steroids and steroid derivatives	537.291	341.529	225.637	437.057	343.813	153.298	36.8425	206.951	260.415	60.7386	253.065	259.365	134.74	87.0337	78.9411	152.238	69.998	104.555	2.59467	17.917	23.8756	32.678	10.1022	32.3677	3.43725e-05	0.960181	s
6.12_166.0279n	149.025	6.11595	pos	M+H-H2O, M+H	C8H6O4	7.47893	94.9821	100 - 8.87 - 1.17	HMDB0061917	Terephthalate	Organic compounds	Benzenoids	Benzene and substituted derivatives	154.611	352.474	414.31	215.214	658.75	619.989	878.251	554.848	722.119	1067.69	734.283	1019.67	647.421	716.207	517.627	775.171	933.757	487.98	877.514	869.606	822.419	1148.64	827.6	925.78	0.00035734	0.957918	s
2.10_788.3324m/z	788.332	2.10422	neg	M-H2O-H	C43H53NO14	4.5646	81.5463	100 - 48 - 14.2 - 3.11 - 0.556	HMDB0015378	Docetaxel	Organic compounds	Lipids and lipid-like molecules	Prenol lipids	630.195	390.571	212.464	653.525	396.96	251.124	44.2371	228.991	200.459	21.6721	255.921	236.049	166.131	133.857	168.542	184.001	129.272	234.474	13.7386	38.8229	80.6238	9.76596	41.3783	105.882	8.14454e-05	0.954937	s
2.50_941.4409m/z	941.441	2.49567	neg	3M-H	C19H22O4	-7.74464	54.0459	100 - 21 - 2.91 - 0.303	HMDB0039063	7-[(6-Hydroxy-3,7-dimethyl-2,7-octadienyl)oxy]-2H-1-benzopyran-2-one	Organic compounds	Phenylpropanoids and polyketides	Coumarins and derivatives	395.864	490.744	502.92	414.29	528.897	491.706	123.065	442.188	496.718	67.6283	530.6	539.854	398.412	255.463	373.166	505.669	205.04	444.449	84.9717	130.389	64.566	31.8007	100.017	16.9181	0.000156961	0.953744	s
2.05_887.4435m/z	887.444	2.04708	neg	M-H	C47H68O16	0.0988343	72.8605	100 - 52.2 - 16.7 - 3.95 - 0.763 - 0.126	HMDB0032711	Pectenotoxin 7	Organic compounds	Phenylpropanoids and polyketides	Macrolides and analogues	555.655	319.567	211.612	564.504	263.601	186.049	20.0506	189.172	190.127	7.89329	225.637	184.623	163.919	14.5365	141.92	97.4864	26.3661	175.988	8.03043	4.99299	0	2.70451	7.4241	5.37755	0.000106769	0.947759	s
2.24_421.2369m/z	421.237	2.23925	pos	M+H+Na	C45H70O13	-5.21368	67.3006	100 - 50 - 14.9 - 3.28 - 0.587	HMDB0030442	Dinophysistoxin 1	Organic compounds	Organic acids and derivatives	Hydroxy acids and derivatives	2311.17	1752.29	2400.55	3439.11	2795.3	3612.2	1134.78	2069.61	1749.91	1326.79	2795.44	2210.59	2762.54	1886.6	2984.74	2841.55	2034.19	4230.29	1304.78	1988.62	1397.18	1457.34	2035.01	1512.51	0.00947081	0.939246	s
2.58_273.1233m/z	273.123	2.58068	neg	M-H	C15H18N2O3	-4.27995	93.4762	100 - 17.3 - 2.02 - 0.177	HMDB0034885	Imazamethabenz	Organic compounds	Benzenoids	Benzene and substituted derivatives	178.661	159.765	161.128	228.812	207.339	185.943	298.906	252.002	150.301	339.288	338.128	206.302	214.941	267.418	311.801	313.343	366.058	427.506	313.814	396.151	630.662	407.553	561.013	802.948	0.000201999	0.936542	s
2.59_764.4118m/z	764.412	2.59498	pos	M+H	C36H61NO16	7.20129	47.0746	100 - 40.6 - 11.3 - 2.37 - 0.411	HMDB0034713	Fumonisin A1	Organic compounds	Organic acids and derivatives	Carboxylic acids and derivatives	468.666	438.338	282.634	531.529	378.922	168.007	141.431	284.446	217.784	132.887	187.511	223.204	201.12	187.555	78.2004	109.93	85.4816	190.671	105.192	61.3187	49.5353	132.336	70.0766	35.1952	1.64576e-05	0.923127	s
4.35_399.3358n	400.343	4.35223	pos	M+H, M+Na	C23H45NO4	2.24475	97.5808	100 - 25.9 - 4.04 - 0.469	HMDB0000222	L-Palmitoylcarnitine	Organic compounds	Lipids and lipid-like molecules	Fatty Acyls	512.74	659.451	1364.24	692.383	1039.93	1843.75	1221.41	1007.09	1038.1	1481.04	1248.18	1644.16	2866.85	2989.15	2899.66	3908.55	3383.61	3641.64	1307.46	1372.51	723.825	1469.79	1506.19	847.357	5.60233e-09	0.922636	s
0.55_241.0895m/z	241.09	0.553417	neg	M+FA-H	C11H16OS	-4.53324	18.6181	100 - 12.9 - 5.49 - 0.602	HMDB0040241	1-(2-Thienyl)-1-heptanone	Organic compounds	Organooxygen compounds	Carbonyl compounds	156.075	235.743	255.518	173.499	313.177	353.03	883.916	538.314	751.713	970.177	923.772	1172.69	315.939	321.8	270.872	485.226	620.3	359.704	815.155	687.91	712.265	1266.86	1034.36	925.039	1.13918e-06	0.921165	s
2.25_897.4188m/z	897.419	2.24637	neg	M+Na-2H	C47H64N4O12	-9.00957	73.6189	100 - 53.5 - 16.5 - 3.72 - 0.676 - 0.104	HMDB0015332	Rifapentine	Organic compounds	Organoheterocyclic compounds	Naphthofurans	437.288	374.91	241.687	437.727	359.347	222.245	55.5103	277.596	232.492	31.1437	232.345	199.748	213.462	167.883	280.109	156.311	66.4797	171.855	22.1953	53.3903	13.2014	7.83038	42.4405	7.34776	1.0949e-05	0.920861	s
0.75_175.1199m/z	175.12	0.752717	pos	M+H	C6H14N4O2	5.68715	94.2525	100 - 8.19 - 0.708	HMDB0003416	D-Arginine	Organic compounds	Organic acids and derivatives	Carboxylic acids and derivatives	475.272	685.176	698.813	735.682	1038.04	1115.79	991.742	662.35	666.396	1123.21	934.097	907.221	992.608	1184.11	1174.35	1043.55	1246.37	1043.17	956.537	1065.45	1429.92	1033.47	963.225	1369.56	0.0108948	0.913972	s
4.90_513.3261n	548.296	4.89938	neg	M+Cl, M+FA-H	C29H41F2N5O	-3.51295	88.6396	100 - 33.7 - 5.71 - 0.65	HMDB0015584	Maraviroc	Organic compounds	Alkaloids and derivatives	Tropane alkaloids	117.227	449.363	408.506	112.039	389.337	405.712	848.652	605.969	729.992	778.974	518.604	702.328	421.433	695.958	330.603	380.427	661.707	320.134	849.388	726.484	840.026	777.111	802.425	806.433	1.00381e-05	0.908204	s
2.09_359.2295m/z	359.229	2.08995	pos	M+CH3OH+H	C14H30O8	5.82279	92.5505	100 - 15.8 - 2.81 - 0.312	HMDB0061835	Heptaethylene glycol	Organic compounds	Organic oxygen compounds	Organooxygen compounds	1099.24	932.63	1257.75	1488.65	1505.08	2064	348.838	944.497	747.267	389.155	1327.75	1002.08	1444.89	643.698	1827.57	1581.83	676.62	2513.73	462.783	693.303	343.846	426.278	732.26	340.648	0.00394987	0.907002	s
2.44_854.4385m/z	854.439	2.43855	pos	2M+NH4	C23H30O7	7.64825	43.1686	100 - 25.5 - 4.55 - 0.609	HMDB0029464	Asteltoxin	Organic compounds	Organoheterocyclic compounds	Furofurans	499.064	369.77	343.083	485.901	371.531	236.524	218.265	320.829	285.289	79.2473	183.946	133.621	253.533	179.303	189.257	82.7883	110.921	173.921	161.774	140.205	78.2467	49.2589	3.99152	102.098	2.23311e-05	0.899323	s
2.47_428.2524n	427.245	2.47425	neg	M-H, 2M-H, M-H2O-H	C26H36O5	-9.06647	91.8047	100 - 28.7 - 5 - 0.647	HMDB0034064	2-Angeloyl-9-(3-methyl-2E-pentenoyl)-2b,9a-dihydroxy-4Z,10(14)-oplopadien-3-one	Organic compounds	Lipids and lipid-like molecules	Prenol lipids	14351.3	14510.7	16570.4	17505.3	16465.3	18036.3	11863.3	15005.4	11856	9452.17	18949.9	13192	13960.1	14593.9	17916.7	21059.6	16709.4	23788.8	11476.1	13058.2	11977.3	12677.2	14319.8	14747.1	0.0129339	0.890164	s
2.57_637.3005m/z	637.3	2.5664	neg	2M+FA-H	C18H20N2O2	-4.51499	54.0442	100 - 20.5 - 2.41 - 0.207	HMDB0060782	6-allyl-8b-Carboxy-ergoline	Organic compounds	Alkaloids and derivatives	Ergoline and derivatives	438.815	304.186	166.388	541.529	334.937	178.745	3.85299	199.73	267.2	6.45859	201.346	270.173	191.398	58.8878	195.842	204.146	33.2813	205.416	4.63284	7.85892	4.04767	8.01507	6.11756	0.587809	0.000354484	0.886181	s
2.21_549.2855m/z	549.285	2.21067	neg	M-H2O-H	C34H40N4O4	-2.89214	89.4883	100 - 38.8 - 8.17 - 1.22 - 0.143	HMDB0029342	Ceanothine E	Organic compounds	Organic acids and derivatives	Carboxylic acids and derivatives	708.609	387.677	254.747	778.937	436.56	297.29	120.748	287.023	259.571	163.634	306.142	339.031	206.048	284.17	314.503	272.126	355.681	348.378	94.0039	125.514	103.946	101.926	158.068	127.667	0.000522956	0.885854	s
2.33_872.4638n	873.454	2.3321	pos	M+2H, M+H	C47H68O15	9.09972	76.6574	100 - 52.2 - 16.4 - 3.83 - 0.728 - 0.118	HMDB0033492	Pectenotoxin 3	Organic compounds	Phenylpropanoids and polyketides	Macrolides and analogues	524.036	387.5	400.82	577.644	438.832	392.761	187.795	419.862	375.045	171.81	430.05	355.024	367.827	277.156	319.05	333.072	205.258	480.463	122.906	189.007	95.1019	161.249	185.025	75.806	4.96464e-05	0.88336	s
2.18_316.1862m/z	316.186	2.17565	neg	M+Cl	C20H27N	8.77008	90.1825	100 - 22.3 - 2.37 - 0.16	HMDB0240275	Terodiline	Organic compounds	Benzenoids	Benzene and substituted derivatives	589.697	296.73	346.146	803.01	347.178	406.583	45.0407	246.079	188.078	32.9992	282.662	220.034	274.316	118.538	405.413	309.053	112.231	481.02	45.8168	74.6641	51.1972	41.032	74.7108	48.8186	0.000273453	0.881269	s
4.33_332.3317m/z	332.332	4.3308	pos	M+H-H2O	C23H43NO	1.62139	95.2318	100 - 25.8 - 3.39 - 0.304	HMDB0039937	Pipercitine	Organic compounds	Organoheterocyclic compounds	Piperidines	181.036	216.103	252.945	231.114	340.835	334.854	551.575	384.034	292.877	617.525	484.169	451.603	296.266	517.711	512.599	424.469	532.084	591.378	768.213	394.663	544.38	854.486	448.859	615.813	0.00104114	0.880947	s
2.37_600.3482m/z	600.348	2.36712	pos	M+2Na	C57H106N2O21	-9.38575	60.0433	100 - 64.4 - 24.7 - 7.02 - 1.62 - 0.318	HMDB0011915	Ganglioside GM3 (d18:0/16:0)	Organic compounds	Lipids and lipid-like molecules	Sphingolipids	424.053	276.148	270.44	538.488	282.624	235.737	64.1936	221.118	241.575	35.0199	206.46	244.703	184.303	136.386	176.362	151.306	67.9919	268.87	44.3134	54.2345	10.8311	12.2472	54.3174	28.0037	4.65345e-05	0.879846	s
2.26_402.2452n	401.238	2.26067	neg	M-H, M+Na-2H, M+Cl	C18H34N4O6	-6.44476	94.5253	100 - 21.5 - 3.45 - 0.41	HMDB0030407	Merodesmosine	Organic compounds	Organic acids and derivatives	Carboxylic acids and derivatives	1478.36	888.037	628.977	1724.83	972.925	750.514	289.314	714.667	683.83	294.782	706.164	757.041	842.772	881.749	1215.43	870.199	834.857	1226.4	379.861	570.764	460.924	381.395	561.227	344.402	0.00114293	0.878755	s
0.98_219.1115n	242.101	0.980583	pos	M+H, M+Na	C10H13N5O	-2.19832	94.6239	100 - 12.8 - 0.967	HMDB0012204	Cis-zeatin	Organic compounds	Organoheterocyclic compounds	Imidazopyrimidines	378.007	711.205	841.766	431.328	1163.86	1210.01	1333.26	1012.17	997.615	1452.21	1371.95	1310.53	877.705	1016.42	884.358	951.279	1056.19	1071.79	1169.45	1337.82	1389.69	1269.91	1323.13	1480.19	0.000945367	0.877675	s
0.63_307.0845n	308.092	0.632	pos	M+H, M+K	C18H13NO4	0.0897394	91.2435	100 - 20.1 - 2.74 - 0.281	HMDB0029826	Hallacridone	Organic compounds	Organoheterocyclic compounds	Quinolines and derivatives	192.533	448.915	521.187	260.958	740.507	811.923	923.238	684.227	1000.4	1096.88	890.331	1300.69	867.784	1069.52	1472.41	890.285	1186.32	687.189	1072.17	950.552	847.3	1210.58	855.301	775.68	0.00200176	0.876468	s
3.24_482.1736m/z	482.174	3.235	neg	M+FA-H	C22H26F3N3OS	1.19813	94.1194	100 - 26 - 7.98 - 1.45 - 0.19	HMDB0014761	Fluphenazine	Organic compounds	Organoheterocyclic compounds	Benzothiazines	249.053	218.357	205.821	248.161	225.835	226.183	429.153	277.034	176.433	443.154	284.497	156.921	327.677	344.528	352.218	279.339	284.879	371.859	344.951	440.217	746.117	431.359	482.28	892.704	0.00118701	0.875659	s
2.46_1055.5613m/z	1055.56	2.45995	neg	3M-H	C19H28O6	2.66752	59.7056	100 - 21.1 - 3.35 - 0.394	HMDB0039132	[4]-Gingerdiol 3,5-diacetate	Organic compounds	Benzenoids	Phenols	295.556	289.232	211.822	306.572	311.266	235.926	81.0021	181.53	281.412	42.0077	266.623	276.362	164.812	84.4309	141.911	169.804	84.529	171.718	36.5121	37.6181	10.6462	16.6816	12.4189	6.53431	5.38518e-06	0.867562	s
2.06_988.5148m/z	988.515	2.06138	pos	M+NH4	C48H74O20	3.77449	59.2315	100 - 53.5 - 18.2 - 4.61 - 0.96 - 0.172	HMDB0041352	Amaranthussaponin II	Organic compounds	Lipids and lipid-like molecules	Prenol lipids	179.041	555.754	577.175	52.1193	802.416	801.236	874.937	672.735	633.357	832.63	881.678	660.124	982.551	845.029	631.128	902.871	919.796	956.608	804.185	920.143	809.343	883.652	847.869	787.221	0.0068908	0.860768	s
2.35_700.3669m/z	700.367	2.35352	neg	M-2H	C70H114O28	-0.961218	44.2639	100 - 78.1 - 35.8 - 12.1 - 3.32 - 0.773 - 0.158	HMDB0039474	Capsianoside H	Organic compounds	Lipids and lipid-like molecules	Prenol lipids	406.387	302.113	271.548	471.992	328.595	264.12	38.0617	265.191	291.332	25.5026	289.947	294.034	199.699	171.778	225.969	295.543	154.712	283.324	42.3837	50.0309	29.5662	24.8677	43.8936	18.6329	4.10803e-05	0.857883	s
0.80_448.0051m/z	448.005	0.795567	neg	M+Na-2H	C10H15N5O10P2	2.47988	90.2641	100 - 13.2 - 2.86 - 0.301	HMDB0000960	dGDP	Organic compounds	Nucleosides, nucleotides, and analogues	Purine nucleotides	577.414	1037.53	1001.57	539.284	1303.92	1254.77	1312.81	1023.79	1257.65	1633.58	1448.65	1580.4	1064.64	1569.12	1052.32	1542.92	2097.44	1391.68	1193.31	1203.93	1186.43	1521.79	1707.91	1574.04	0.0337205	0.855034	s
2.29_277.0417m/z	277.042	2.28923	neg	M-H2O-H	C10H11F3N2O5	-8.23556	91.7235	100 - 11.9 - 1.67 - 0.143	HMDB0014576	Trifluridine	Organic compounds	Nucleosides, nucleotides, and analogues	Pyrimidine nucleosides	65.2121	150.256	160.49	68.6573	187.895	203.887	405.228	169.87	129.812	476.659	181.74	170.323	217.074	347.835	195.205	233.494	324.592	196.838	394.14	388.813	563.055	407.235	412.416	500.667	0.000163306	0.853528	s
2.52_1031.5414m/z	1031.54	2.5171	neg	2M-H	C29H40O8	3.94378	46.5314	100 - 32.1 - 6.64 - 1.03 - 0.13	HMDB0059923	Cavipetin E isomer 2	Organic compounds	Lipids and lipid-like molecules	Prenol lipids	676.169	571.099	537.029	724.225	610.078	604.453	300.741	544.844	627.707	184.679	552.219	497.563	478.393	372.19	497.171	513.491	388.795	531.466	313.004	389.266	286.515	305.306	269.305	277.957	0.0003506	0.853164	s
2.40_779.3754m/z	779.375	2.39567	neg	3M-H	C12H20O6	6.03937	72.0826	100 - 13.4 - 2.07 - 0.197	HMDB0032857	Glycerol tripropanoate	Organic compounds	Lipids and lipid-like molecules	Glycerolipids	400.615	327.233	290.843	449.426	383.593	337.755	53.2578	304.847	307.188	24.3407	331.054	335.797	219.637	212.583	288.125	289.153	187.752	413.856	49.3962	77.6724	25.2265	36.5117	62.1834	8.5211	4.52956e-05	0.852578	s
2.22_334.1018n	355.072	2.22495	neg	M-H, M+Na-2H	C12H18N2O9	1.71815	91.7419	100 - 14.3 - 2.79 - 0.302	HMDB0029404	(S)-a-Amino-2,5-dihydro-5-oxo-4-isoxazolepropanoic acid N2-glucoside	Organic compounds	Organic oxygen compounds	Organooxygen compounds	115.764	122.339	148.852	135.065	146.14	190.207	367.422	192.472	122.471	408.241	255.686	167.696	172.164	229.017	236.546	218.57	298.061	289.219	267.901	342.495	588.564	359.603	455.623	682.431	0.000387785	0.843669	s
2.03_692.3302n	710.364	2.0328	pos	M+NH4, M+Na	C32H52O16	6.72221	71.7187	100 - 35.8 - 9.52 - 1.88 - 0.312	HMDB0037125	Pisumoside B	Organic compounds	Lipids and lipid-like molecules	Prenol lipids	372.287	690.984	689.222	220.228	879.114	889.094	975.572	749.723	752.326	942.566	891.843	712.727	1056.87	992.219	926.438	863.254	900.785	1064.58	1018.13	1053.71	858.873	845.279	983.504	865.511	0.00554775	0.835304	s
4.56_479.3026n	480.31	4.55797	pos	M+H, M+Na	C23H46NO7P	2.97031	96.2793	100 - 26 - 4.69 - 0.634	HMDB0011476	LysoPE(0:0/18:1(9Z))	Organic compounds	Lipids and lipid-like molecules	Glycerophospholipids	425.299	1078.79	1269.31	597.357	1610.18	1771.17	1188.65	808.723	953.655	1408.48	993.66	1398.6	1708.22	2178.57	1396.73	2101.53	2456.16	1626.26	1307.12	1277.65	1479.36	1499.74	1320.68	1478.55	0.0033538	0.830168	s
2.70_475.2838m/z	475.284	2.7014	neg	M+Na-2H	C29H42O4	1.91695	27.0594	100 - 32 - 5.77 - 0.756	HMDB0036850	Ceanothenic acid	Organic compounds	Lipids and lipid-like molecules	Prenol lipids	416.847	341.294	294.915	497.091	355.991	248.372	57.3867	285.172	289.375	34.4049	257.373	275.683	300.424	204.576	274.506	249.966	162.268	272.08	68.1101	83.9015	50.7118	50.2653	88.5645	34.411	3.39663e-05	0.824792	s
2.50_435.2210m/z	435.221	2.50282	neg	M+FA-H	C20H32F2O5	2.62005	98.0033	100 - 22.2 - 3.37 - 0.385	HMDB0015180	Lubiprostone	Organic compounds	Lipids and lipid-like molecules	Fatty Acyls	535.733	342.225	265.014	638.525	371.471	250.426	47.3124	214.817	304.084	12.189	237.142	290.013	261.948	208.926	304.19	318.314	166.257	354.254	63.2018	98.9388	54.5636	64.979	64.1513	17.1312	0.000189832	0.823869	s
3.93_346.3322m/z	346.332	3.93222	pos	M+NH4	C20H40O3	1.8857	95.77	100 - 22.2 - 2.96 - 0.294	HMDB0032477	Polyoxyethylene 40 monostearate	Organic compounds	Lipids and lipid-like molecules	Fatty Acyls	234.041	317.402	381.443	328.655	509.619	580.5	492.576	356.858	467.741	643.819	497.324	676.442	637.751	905.995	424.928	836.364	1088.87	613.724	623.663	521.387	714.08	727.617	587.017	827.493	0.00418187	0.822486	s
2.21_403.2053m/z	403.205	2.21067	neg	M+Na-2H	C26H28N3+	6.07627	75.6797	100 - 29.5 - 4.21 - 0.385	HMDB0240273	Pyrvinium	Organic compounds	Organoheterocyclic compounds	Pyrroles	682.222	364.132	233.153	803.224	404.304	275.282	18.9957	281.586	320.723	6.74713	248.534	356.794	378.1	238.68	399.201	363.724	236.474	436.369	42.3749	101.772	65.0782	54.8575	92.5702	56.401	0.000957863	0.81961	s
2.37_897.4527n	880.449	2.37425	pos	M+H-H2O, M+K	C40H73N3O15P2	1.13053	40.1003	100 - 45.8 - 13.3 - 2.9 - 0.519	HMDB0116229	CDP-DG(i-16:0/i-12:0)	Organic compounds	Lipids and lipid-like molecules	Glycerophospholipids	466.204	431.383	204.233	308.669	200.499	59.812	149.931	192.814	238.26	84.0698	69.4416	43.3265	89.4593	102.045	42.7937	20.029	151.501	49.647	19.4007	67.8067	0	10.8017	11.4758	10.0963	0.000530177	0.817815	s
2.17_386.2467n	409.237	2.16852	pos	M+H, M+Na	C24H34O4	2.46262	66.5762	100 - 26.5 - 4.19 - 0.492	HMDB0000385	12a-Hydroxy-3-oxocholadienic acid	Organic compounds	Lipids and lipid-like molecules	Steroids and steroid derivatives	477.962	308.071	168.447	525.144	152.934	78.8895	59.854	189.581	243.618	38.0494	106.249	173.646	130.31	63.6981	53.1651	28.1345	33.7938	95.2175	20.0257	61.1751	0	6.6885	25.5207	17.4158	0.00145867	0.81493	s
4.47_557.3193m/z	557.319	4.47293	neg	M+Na-2H	C27H53O8P	-5.93463	95.514	100 - 30.1 - 6.02 - 0.903 - 0.111	HMDB0115689	PA(8:0/i-16:0)	Organic compounds	Lipids and lipid-like molecules	Glycerophospholipids	262.318	606.619	548.631	268.262	598.299	650.496	747.38	521.797	543.87	778.317	565.384	562.281	590.935	776.087	560.369	622.498	722.834	642.357	702.901	701.048	842.331	738.881	756.815	892.673	0.00523007	0.810624	s
2.07_618.3069m/z	618.307	2.0685	neg	M-H	C29H45N7O6S	-1.68232	75.4712	100 - 35.5 - 11.9 - 2.69 - 0.477	HMDB0033241	Glycylalanylprolylmethionylphenylalanylvalinamide	Organic compounds	Organic acids and derivatives	Carboxylic acids and derivatives	837.782	577.2	364.074	956.532	546.303	383.698	197.721	458.194	327.088	161.653	608.472	426.684	359.501	833.197	503.632	374.665	846.296	674.986	104.183	265.847	94.9769	93.9135	328.915	71.5906	0.0013911	0.810574	s
2.45_599.3413m/z	599.341	2.45282	neg	2M-H	C19H24O3	5.81824	72.0958	100 - 20.9 - 2.7 - 0.259	HMDB0060088	4-Methoxyestrone	Organic compounds	Lipids and lipid-like molecules	Steroids and steroid derivatives	466.666	436.459	412.257	522.721	471.061	400.657	193.294	359.443	411.263	99.3044	435.913	391.307	296.596	284.439	367.122	411.13	245.323	403.015	214.238	212.722	150.705	162.518	146.875	151.68	0.000108538	0.807547	s
2.54_399.2593m/z	399.259	2.53782	neg	2M-H	C13H16N2	9.72172	96.7733	100 - 15 - 1.04	HMDB0014771	Dexmedetomidine	Organic compounds	Benzenoids	Benzene and substituted derivatives	1984.76	1457.6	1411.21	2539.19	1556	1449.01	495.868	1201.92	1035.39	359.769	1298.54	1103.12	1721.43	1351.42	1999.98	2129.41	1387.31	2379.65	784.485	1002.34	783.429	777.13	941.88	794.34	9.27913e-05	0.806713	s
2.41_769.3331m/z	769.333	2.40997	pos	2M+H	C15H28O11	-0.605901	84.8388	100 - 17 - 3.61 - 0.45	HMDB0033063	2,3-Butanediol apiosylglucoside	Organic compounds	Organic oxygen compounds	Organooxygen compounds	392.004	321.239	303.444	630.89	538.867	503.798	195.08	448.742	436.976	233.09	610.604	573.262	486.155	433.221	349.567	494.98	441.491	439.218	162.131	225.336	109.622	118.416	125.275	58.9867	0.000221151	0.805671	s
4.39_465.3432n	504.309	4.39438	pos	M+H-H2O, M+K, M+H-2H2O	C23H50N2O5P+	-5.51981	90.1995	100 - 26.4 - 4.37 - 0.541	HMDB0006482	LysoSM(d18:1)	Organic compounds	Lipids and lipid-like molecules	Sphingolipids	34.1711	57.6605	88.2989	25.3547	42.6866	73.7867	596.579	382.894	418.363	596.242	480.12	529.888	139.129	118.657	127.204	169.472	114.522	119.715	537.17	503.644	515.061	597.481	564.713	500.659	1.29805e-13	0.804784	s
2.43_603.3129m/z	603.313	2.43138	neg	M+Cl	C34H48O7	6.0943	77.5255	100 - 37.6 - 8.31 - 1.35 - 0.177	HMDB0035388	(24E)-3alpha,15alpha-Diacetoxy-23-oxo-7,9(11),24-lanostatrien-26-oic acid	Organic compounds	Lipids and lipid-like molecules	Prenol lipids	379.419	388.277	405.438	425.716	445.369	441.814	125.108	337.617	381.438	48.2349	389.804	391.623	309.034	152.911	399.655	464.059	115.833	511.16	96.6057	116.113	94.1057	84.1593	55.1396	77.7069	0.000572938	0.801469	s
2.48_775.4214m/z	775.421	2.4814	pos	M+H-2H2O	C42H66O15	-6.02298	88.8209	100 - 46.8 - 13.8 - 3.03 - 0.547	HMDB0040840	15-Oxo-21-hydroxymabiogenin 3-[rhamnosyl-(1->6)-glucoside]	Organic compounds	Lipids and lipid-like molecules	Steroids and steroid derivatives	250.996	260.972	450.668	178.839	232.26	300.202	315.552	263.136	230.286	225.302	148.017	261.635	170.3	117.045	20.5662	213.855	115.587	134.277	175.737	59.1196	33.6264	20.4433	18.9433	37.1064	7.02031e-05	0.794577	s
5.09_303.2315m/z	303.231	5.09153	neg	2M-H	C10H16O	-4.902	97.6252	100 - 11 - 0.756	HMDB0059885	p-Menth-1-en-9-al	Organic compounds	Lipids and lipid-like molecules	Prenol lipids	6.05174	16.2439	6.63037	3.96657	10.4949	11.8949	144.563	189.163	158.147	262.666	62.206	248.021	38.9182	34.7676	19.2762	30.7044	32.3744	2.80383	296.646	222.118	320.472	427.986	278.576	575.471	2.34911e-07	0.793896	s
0.82_463.0710n	462.064	0.817	neg	M-H, M+Na-2H	C14H18N5O11P	-6.574	84.6996	100 - 17.6 - 3.72 - 0.473	HMDB0000536	Adenylsuccinic acid	Organic compounds	Nucleosides, nucleotides, and analogues	Purine nucleotides	27.4716	101.66	102.195	34.914	153.905	128.621	109.827	211.071	221.162	168.26	328.389	308.104	438.323	534.585	494.326	649.408	819.687	754.827	100.358	311.333	336.573	156.7	467.378	507.903	2.91553e-06	0.793474	s
2.39_610.2872m/z	610.287	2.38853	neg	M-H	C36H41N3O6	-8.31536	75.094	100 - 40.7 - 9.32 - 1.54 - 0.204	HMDB0014669	Lercanidipine	Organic compounds	Benzenoids	Benzene and substituted derivatives	406.342	272.237	159.422	423.217	265.207	165.832	2.95818	168.443	194.893	4.3196	175.718	66.2452	146.706	78.1207	196.435	127.723	26.1398	187.187	9.59005	48.5332	10.7284	4.78325	1.19602	4.22715	0.000108998	0.79338	s
2.80_526.3585m/z	526.359	2.8014	neg	M-H	C32H49NO5	8.93673	84.3604	100 - 35.7 - 7.22 - 1.06 - 0.124	HMDB0030291	Daphniphylline	Organic compounds	Alkaloids and derivatives	Daphniphylline-type alkaloids	451.813	268.539	272.45	678.374	323.356	205.12	36.8134	297.655	324.967	34.1411	307.935	185.018	321.749	204.059	285.596	266.354	126.794	261.09	62.2063	89.033	68.8048	72.7807	55.8831	29.6882	0.00203779	0.786272	s
2.29_215.0544n	260.052	2.28923	neg	M+Cl, M+FA-H	C5H14NO6P	-6.93279	96.0681	100 - 6.16 - 1.39	HMDB0059660	sn-glycero-3-Phosphoethanolamine	Organic compounds	Lipids and lipid-like molecules	Glycerophospholipids	46.2999	96.139	119.404	43.9654	117.921	134.338	290.931	120.731	95.9788	327.866	121.858	118.602	147.974	256.204	134.572	166.128	257.149	142.702	289.27	282.602	400.23	326.577	334	374.539	3.87261e-05	0.784044	s
2.18_466.1975m/z	466.198	2.17565	neg	M-H2O-H	C25H32ClN5O3	-8.22242	76.7872	100 - 29.3 - 36.7 - 9.94 - 1.58 - 0.183	HMDB0061040	hydroxynefazodone	Organic compounds	Organoheterocyclic compounds	Diazinanes	757.433	698.466	483.42	810.661	734.166	493.769	530.441	797.28	1035.82	450.053	848.671	1245.72	853.557	1530.86	1008.07	1010.56	1527.68	1188.07	740.9	1203.57	888.191	668.072	1431.4	838.115	0.0174516	0.781852	s
2.75_669.3962m/z	669.396	2.7514	neg	M+Na-2H	C37H60O9	-3.44724	76.9545	100 - 41.1 - 10.1 - 1.82 - 0.268	HMDB0038348	Goyaglycoside a	Organic compounds	Lipids and lipid-like molecules	Steroids and steroid derivatives	378.64	230.328	215.669	499.007	320.145	207.801	13.5786	241.41	211.971	0.56456	336.278	199.663	185.461	93.1607	296.97	238.758	133.26	420.668	1.66716	8.29157	11.3461	3.12855	8.92976	1.63304	0.000664265	0.775475	s
2.51_661.3419m/z	661.342	2.50995	neg	M+Cl	C33H54O11	9.38427	85.1619	100 - 36.7 - 8.81 - 1.59 - 0.235	HMDB0034091	Ponasteroside A	Organic compounds	Lipids and lipid-like molecules	Steroids and steroid derivatives	266.357	358.194	330.033	310.828	366.497	330.545	155.988	372.871	340.695	107.8	390.489	357.295	314.292	204.567	262.492	398.203	170.678	246.26	100.87	107.485	53.1043	82.7936	74.749	42.9138	7.64446e-05	0.773123	s
2.56_794.4095n	795.404	2.55927	pos	M+H-H2O, M+H	C41H62O15	0.743625	94.0853	100 - 45.6 - 13.3 - 2.88 - 0.514	HMDB0031025	Betavulgaroside IV	Organic compounds	Lipids and lipid-like molecules	Prenol lipids	307.177	312.091	276.015	220.499	315.787	172.852	238.534	258.578	250.103	152.506	200.258	214.122	219.419	182.948	75.215	35.0142	72.34	128.278	116.282	122.03	3.32099	39.6126	98.1806	81.5451	2.20888e-05	0.773109	s
2.25_243.1704m/z	243.17	2.24637	neg	M-H	C12H24N2O3	-4.17176	95.5295	100 - 14.1 - 1.54 - 0.124	HMDB0028933	Leucyl-Leucine	Organic compounds	Organic acids and derivatives	Carboxylic acids and derivatives	836.156	396.822	383.383	1042.95	497.659	525.266	247.739	378.567	398.182	271.334	465.225	559.365	389.331	430.562	506.454	507.996	507.724	613.88	212.326	264.919	213.43	260.631	364.88	244.92	0.00505757	0.77013	s
2.17_1021.5541m/z	1021.55	2.1685	neg	2M+FA-H	C28H40O7	1.14882	52.4569	100 - 31 - 6.08 - 0.893 - 0.107	HMDB0034334	14alpha-Hydroxyixocarpanolide	Organic compounds	Lipids and lipid-like molecules	Steroids and steroid derivatives	430.611	281.142	57.679	533.491	288.224	64.6937	36.1462	161.176	99.2317	11.76	160.441	70.4072	29.1157	90.2314	141.494	33.5884	122.739	177.003	0	2.17786	0	3.80151	3.37502	38.7956	0.00223828	0.768594	s
3.98_579.3035m/z	579.303	3.97505	neg	M-H	C29H40N8O5	-2.43653	93.9126	100 - 34.9 - 6.96 - 1.01 - 0.117	HMDB0030459	Hordatine B	Organic compounds	Phenylpropanoids and polyketides	2-arylbenzofuran flavonoids	4.17861	20.9407	23.8919	4.08281	7.70047	11.403	844.952	793.726	753.677	785.025	850.745	722.176	16.5774	16.7155	21.3461	5.68531	8.23099	8.13324	633.932	688.525	765.889	707.868	792.04	732.237	9.02462e-21	0.765095	s
4.64_353.2106m/z	353.211	4.63652	neg	M+Na-2H	C21H32O3	2.24182	97.4701	100 - 23.2 - 3.18 - 0.323	HMDB0033918	(15alpha,20R)-15,20-Dihydroxypregn-4-en-3-one	Organic compounds	Lipids and lipid-like molecules	Steroids and steroid derivatives	396.647	697.299	614.089	417.142	819.704	712.188	616.06	580.96	719.019	636.67	695.278	770.182	933.526	1212.67	765.817	1179.03	1355.94	1033.54	840.494	778.847	733.987	836.873	858.163	853.528	6.38998e-05	0.764896	s
2.52_260.1864m/z	260.186	2.51712	pos	M+NH4	C13H22O4	3.16305	90.3224	100 - 14.5 - 1.79 - 0.159	HMDB0038736	(3S,5R,6R,7E)-3,5,6-Trihydroxy-7-megastigmen-9-one				36.922	42.7373	88.0026	39.6304	68.8867	127.668	287.023	162.631	251.736	312.278	265.336	310.818	159.183	157.654	138.23	186.677	178.501	193.686	374.823	378.361	257.099	382.763	389.458	274.415	1.08526e-08	0.762095	s
2.27_491.2412m/z	491.241	2.27495	neg	M+Na-2H	C28H38O6	-0.614933	46.4077	100 - 30.9 - 5.86 - 0.826	HMDB0036437	Methyl lucidenate F	Organic compounds	Lipids and lipid-like molecules	Prenol lipids	750.599	453.08	320.641	799.964	505.945	389.409	39.4096	375.927	433.245	22.7492	346.411	456.731	446.137	603.591	553.982	478.456	560.859	558.825	101.316	204.386	110.681	75.2916	172.613	38.0578	9.91422e-05	0.761703	s
2.15_129.0551m/z	129.055	2.14708	neg	M-H2O-H	C6H12O4	-4.25097	93.0246	100 - 6.78 - 1.02	HMDB0059705	(2-Methoxyethoxy)propanoic acid	Organic compounds	Organic acids and derivatives	Carboxylic acids and derivatives	84.298	62.6752	108.722	87.7579	71.5775	141.669	219.884	126.919	120.104	262.692	188.708	165.699	156.458	257.878	183.883	242.708	309.98	247.524	300.027	302.242	165.775	420.831	405.405	221	0.000162957	0.760221	s
2.08_429.2427m/z	429.243	2.0828	neg	M+Cl	C23H38O5	3.48883	86.8665	100 - 25.5 - 4.15 - 0.505	HMDB0012530	11-Hydroxyeicosatetraenoate glyceryl ester	Organic compounds	Lipids and lipid-like molecules	Endocannabinoids	431.518	222.2	145.181	541.11	201.948	161.946	16.531	147.24	124.619	13.9531	171.313	139.021	125.459	94.6699	193.255	132.293	57.5087	171.464	8.19171	48.736	8.61587	0.643771	31.4769	21.0235	0.000725949	0.759351	s
2.47_763.3898m/z	763.39	2.46712	pos	M+H-H2O	C41H56N4O11	-1.83001	45.9419	100 - 46.9 - 13 - 2.66 - 0.441	HMDB0060732	25-O-Desacetyl rifabutin	Organic compounds	Organoheterocyclic compounds	Naphthofurans	269.41	237.605	184.092	265.492	234.582	158.251	119.59	130.613	166.207	45.4845	164.573	60.2907	82.4772	7.45855	63.7441	50.1125	72.0408	55.7592	32.8023	55.9034	61.4907	59.7492	12.6586	16.7097	1.6931e-07	0.758565	s
3.05_463.0463m/z	463.046	3.05	neg	2M+FA-H	C10H8ClNO2	-1.41343	78.5465	100 - 11.3 - 33 - 3.69 - 0.321	HMDB0032936	4-Chloro-1H-indole-3-acetic acid	Organic compounds	Organoheterocyclic compounds	Indoles and derivatives	220.361	225.911	254.281	233.607	250.623	262.683	508.257	317.869	195.83	441.649	380.757	221.18	309.905	408.669	349.066	308.096	378.89	387.96	363.965	457.787	614.766	359.247	452.538	674.369	0.00190456	0.755295	s
0.62_244.0695n	279.038	0.6177	neg	M-H, M+Cl	C9H12N2O6	-0.272563	95.3488	100 - 10.8 - 1.77 - 0.149	HMDB0000296	Uridine	Organic compounds	Nucleosides, nucleotides, and analogues	Pyrimidine nucleosides	29.2807	88.2435	87.7587	25.3856	112.041	110.02	133.056	99.5623	170.719	173.165	161.393	259.38	217.386	206.277	222.877	288.189	413.155	278.179	176.877	206.236	260.007	283.622	291.376	332.675	2.89824e-05	0.749394	s
5.58_381.1722m/z	381.172	5.57515	neg	M-H2O-H	C23H28O6	3.73502	95.3243	100 - 25.4 - 4.33 - 0.554	HMDB0038918	Armillaritin	Organic compounds	Lipids and lipid-like molecules	Prenol lipids	322.628	550.077	554.688	406.389	515.932	545.264	647.513	432.233	639.751	585.124	420.399	561.489	650.391	1109.51	477.714	619.635	968.045	495.681	739.897	618.291	752.416	793.329	699.613	742.388	0.0221721	0.748034	s
0.97_218.1027m/z	218.103	0.973433	neg	M-H	C9H17NO5	-3.12145	96.855	100 - 10.5 - 1.52 - 0.121	HMDB0000210	Pantothenic acid	Organic compounds	Organooxygen compounds	Alcohols and polyols	1179.09	1681.57	1491.6	1341.12	2066.42	1787.09	2030.22	1963.93	1623.81	2273.77	2558.15	2214.64	1558.74	1917.21	1737.8	1881.32	2116.64	2072.07	1694.69	1857.7	2079.42	1956.38	2497.7	2405.65	0.022363	0.744731	s
0.65_288.0574n	323.027	0.646283	neg	M+Cl, M+FA-H	C10H12N2O8	-6.73972	89.2427	100 - 12 - 2.3 - 0.218	HMDB0000788	Orotidine	Organic compounds	Nucleosides, nucleotides, and analogues	Pyrimidine nucleosides	40.4582	154.616	108.102	26.0617	201.449	145.155	486.698	307.276	478.774	517.804	522.514	707.834	216.395	238.734	151.457	282.043	421.918	192.051	424.056	411.998	436.457	619.245	570.308	558.691	8.33327e-07	0.741785	s
2.37_417.2221m/z	417.222	2.37423	neg	2M-H	C10H15N3O2	-8.37054	75.0058	100 - 12.2 - 1.09	HMDB0041809	4-(Methylnitrosamino)-1-(3-pyridyl)-1-butanol	Organic compounds	Organoheterocyclic compounds	Pyridines and derivatives	653.15	450.698	379.065	725.787	480.568	383.593	105.819	314.248	333.37	77.0275	367.873	320.79	420.887	336.166	495.565	525.772	375.669	560.106	145.333	196.669	136.485	118.364	181.986	116.762	2.39847e-05	0.741589	s
2.48_378.2017m/z	378.202	2.48138	neg	M+Na-2H	C22H31NO3	-9.39407	93.6691	100 - 24.6 - 3.52 - 0.37	HMDB0015195	Oxybutynin	Organic compounds	Benzenoids	Benzene and substituted derivatives	393.03	191.897	160.851	453.802	232.639	183.628	18.6467	95.0794	172.964	3.21891	127.092	200.327	138.319	59.0312	161.305	188.008	54.4333	186.854	20.2572	26.0001	23.381	12.5022	15.7851	23.8713	0.000278315	0.735071	s
2.46_512.3043m/z	512.304	2.45995	neg	M+FA-H	C29H41NO4	5.5043	49.1398	100 - 32.4 - 5.89 - 0.776	HMDB0015057	Buprenorphine	Organic compounds	Benzenoids	Phenanthrenes and derivatives	287.921	267.378	263.786	311.772	281.05	237.37	61.2238	175.4	183.585	29.0359	209.365	147.047	158.913	112.976	200.965	241.05	113.166	201.717	68.9937	78.0742	45.2125	42.2011	35.2857	36.2506	1.04146e-06	0.72964	s
0.82_218.1398m/z	218.14	0.817017	pos	M+NH4	C11H12N4	-1.08867	92.5557	100 - 13.5 - 0.844	HMDB0060606	Hydralazine acetone hydrazone	Organic compounds	Organoheterocyclic compounds	Diazanaphthalenes	159.007	235.415	294.61	200.876	329.116	390.514	378.354	252.798	335.807	404.884	361.547	384.105	471.695	584.165	682.885	439.247	556.13	538.488	465.421	401.947	376.584	625.753	452.827	414.85	4.5997e-05	0.729179	s
3.05_448.0770n	469.064	3.05	neg	M-H, M+Na-2H	C24H16O9	-5.53285	89.2019	100 - 26.5 - 5.22 - 0.763	HMDB0037323	2,3-Dihydro-5,5',7,7'-tetrahydroxy-2-(4-hydroxyphenyl)[3,8'-bi-4H-1-benzopyran]-4,4'-dione	Organic compounds	Phenylpropanoids and polyketides	Isoflavonoids	224.674	265.172	274.801	240.955	232.09	242.525	523.366	308.301	176.864	387.831	379.925	169.495	324.58	409.928	371.621	306.321	346.572	351.445	401.943	479.702	657.636	318.228	405.505	628.316	0.00446454	0.727563	s
0.61_146.0452m/z	146.045	0.610567	neg	M-H	C5H9NO4	-4.82951	93.4554	100 - 6.03 - 0.974	HMDB0062183	N-lactoyl-Glycine	Organic compounds	Organic acids and derivatives	Carboxylic acids and derivatives	227.691	532.241	573.379	278.219	682.435	728.028	621.606	439.026	572.515	786.502	636.71	784.745	691.876	927.713	562.673	1078.48	1332.82	828.316	657.821	584.145	549.017	992.719	898.072	772.581	0.021049	0.71604	s
4.21_588.3277m/z	588.328	4.20935	neg	M+FA-H	C28H50NO7P	-5.53777	84.7287	100 - 31.5 - 6.23 - 0.922 - 0.111	HMDB0010396	LysoPC(20:4(8Z,11Z,14Z,17Z))				15.1379	28.2264	36.1186	18.5691	31.2155	42.8489	256.457	213.531	215.451	245.058	223.934	234.947	33.1367	40.3297	43.1752	37.8896	27.6546	59.7096	300.854	312.413	371.068	289.607	374.171	390.447	1.26184e-15	0.714005	s
0.82_492.1987n	527.168	0.817	neg	M-H, M+Cl	C25H32O10	-1.80373	91.7171	100 - 27.8 - 5.77 - 0.888 - 0.115	HMDB0032906	Isolariciresinol 9'-O-alpha-L-arabinofuranoside	Organic compounds	Lignans, neolignans and related compounds	Lignan glycosides	965.344	197.239	56.7394	976.362	221.032	52.409	18.0286	40.2208	141.481	14.7481	75.8458	113.834	56.6917	300.099	255.604	49.6529	302.468	250.224	15.714	66.4343	67.7692	5.50029	7.63078	64.6832	0.0410066	0.708586	s
2.70_615.3542m/z	615.354	2.7014	neg	M+FA-H	C34H50O7	0.518031	76.0188	100 - 37.6 - 8.31 - 1.35 - 0.178	HMDB0035292	Ganodermic acid P2	Organic compounds	Lipids and lipid-like molecules	Prenol lipids	382.159	157.846	135.087	522.813	172.735	83.9129	27.6051	121.674	246.924	21.9959	104.477	121.684	115.285	39.8583	72.396	59.5477	22.0048	57.7547	30.3578	34.3285	33.4124	18.723	22.6197	22.9222	0.00515675	0.703527	s
2.38_514.3076m/z	514.308	2.38138	neg	M+Cl	C24H50NO6P	1.35867	80.3338	100 - 27.1 - 4.77 - 0.629	HMDB0010407	LysoPC(P-16:0)	Organic compounds	Lipids and lipid-like molecules	Glycerophospholipids	2265.02	2146.87	2228.49	2571.31	2341.44	2398.84	1313.79	1756.24	1917.54	1079.77	1966.74	1943.81	1642.27	1971.4	2004.06	2369.6	2035.61	2352.94	2102.4	1617.29	1524.87	2191.3	1500.37	1768.45	0.00308734	0.701279	s
2.55_883.4460m/z	883.446	2.55213	pos	M+K	C43H72O16	0.922135	80.6593	100 - 47.9 - 14.5 - 3.29 - 0.612	HMDB0038390	Cyclopassifloside III	Organic compounds	Lipids and lipid-like molecules	Prenol lipids	294.257	236.662	174.116	370.32	241.643	127.92	106.769	158.565	140.799	113.89	208.713	99.1106	118.88	81.7324	30.8221	90.3601	126.808	151.5	96.9397	47.0066	38.8711	113.482	87.3311	15.5688	0.000164903	0.692987	s
0.76_244.0692n	279.038	0.759867	neg	M-H, M+Cl	C9H12N2O6	-1.21307	95.4261	100 - 10.8 - 1.77 - 0.149	HMDB0000767	Pseudouridine	Organic compounds	Nucleosides, nucleotides, and analogues	Nucleoside and nucleotide analogues	37.5913	100.322	94.4688	33.4559	125.009	121.026	109.577	89.2646	130.01	152.714	135.185	164.053	181.745	270.826	266.217	248.172	319.422	359.981	143.112	199.424	287.899	175.226	247.934	350.643	1.94215e-05	0.691459	s
0.57_272.0054m/z	272.005	0.5677	neg	M-H	C10H11NO4S2	-1.01112	79.7794	100 - 13.1 - 10.6 - 1.24 - 0.393	HMDB0015492	Stepronin	Organic compounds	Organic acids and derivatives	Carboxylic acids and derivatives	20.872	74.861	98.7052	7.62521	100.825	121.722	449.019	294.005	401.943	549.222	407.15	583.724	141.534	144.467	84.9435	166.375	219.817	97.5426	430.119	365.321	349.027	622.047	516.388	453.867	2.17862e-08	0.686822	s
2.11_550.2526m/z	550.253	2.11137	neg	M+Cl	C29H41NO7	-9.85394	84.5344	100 - 32.5 - 6.54 - 0.983 - 0.12	HMDB0014754	Candoxatril	Organic compounds	Benzenoids	Indanes	474.028	302.719	307.602	538.798	311.5	334.088	83.6431	305.866	228.384	61.204	326.228	276.61	279.059	183.526	335.66	345.97	131.664	451.073	91.6382	141.906	110.284	71.8029	175.818	91.0487	0.00119151	0.685504	s
5.14_353.1412m/z	353.141	5.14153	neg	M-H	C21H22O5	4.9514	95.5745	100 - 23.2 - 3.59 - 0.417	HMDB0037479	Xanthohumol	Organic compounds	Phenylpropanoids and polyketides	Linear 1,3-diarylpropanoids	447.498	624.398	636.662	502.206	615.202	641.877	718.398	482.071	654.612	766.945	486.211	568.72	654.382	926.932	661.632	660.271	874.924	670.283	668.47	660.236	889.596	720.149	703.473	990.531	0.0233711	0.685367	s
2.23_431.2381m/z	431.238	2.23208	neg	2M-H	C8H16N4O3	2.11665	82.9943	100 - 10.4 - 1.11	HMDB0004620	N-a-Acetyl-L-arginine	Organic compounds	Organic acids and derivatives	Carboxylic acids and derivatives	341.647	257.71	179.548	365.351	268.731	193.682	33.8689	189.751	142.499	47.4446	182.052	150.781	166.918	124.198	228.173	199.71	76.165	230.509	40.2903	80.0972	65.8656	40.0461	55.4756	30.8125	4.43377e-05	0.682942	s
6.12_436.3424m/z	436.342	6.11595	pos	M+CH3OH+H	C25H41NO3	0.641798	92.7419	100 - 28 - 4.39 - 0.498	HMDB0062339	N-Palmitoyl phenylalanine	Organic compounds	Organic acids and derivatives	Carboxylic acids and derivatives	82.8646	300.816	157.842	185.359	463.501	513.671	506.522	343.494	519.864	543.291	458.281	574.415	509.979	484.574	458.382	394.083	527.965	296.576	545.506	536.762	568.018	555.103	485.353	577.492	0.00268	0.678605	s
2.96_353.1168m/z	353.117	2.95787	pos	2M+H	C4H8N4O4	1.14668	97.4367	100 - 6.03 - 0.978	HMDB0001209	Allantoic acid	Organic compounds	Organic acids and derivatives	Carboxylic acids and derivatives	142.302	162.091	173.504	225.714	266.21	235.61	340.824	248.505	156.311	359.411	314.07	187.365	220.361	233.463	269.783	241.619	244.074	342.633	306.062	384.843	503.544	325.34	390.088	540.725	0.000505218	0.678311	s
2.40_399.2031m/z	399.203	2.40282	neg	M-H	C20H32O8	1.74406	95.1527	100 - 22.3 - 4.01 - 0.526	HMDB0036855	Cincassiol B	Organic compounds	Lipids and lipid-like molecules	Prenol lipids	157.613	174.456	219.509	190.047	203.56	274.674	77.1286	178.374	172.67	56.1141	208.611	220.21	129.775	75.2677	134.084	192.069	66.2404	168.248	36.8044	34.9343	18.9518	25.1367	46.7159	14.2501	3.64098e-05	0.676598	s
2.09_550.3334m/z	550.333	2.08993	neg	M-H2O-H	C30H52NO7P	5.45877	90.0653	100 - 33.7 - 6.93 - 1.06 - 0.132	HMDB0010402	LysoPC(22:5(4Z,7Z,10Z,13Z,16Z))				802.583	535.323	580.724	979.517	547.844	600.78	240.54	569.195	322.772	176.87	664.753	397.865	513.427	427.161	720.548	642.729	377.178	903.969	250.427	377.22	288.317	215.528	457.562	268.54	0.00420134	0.674748	s
2.52_998.4961m/z	998.496	2.52427	pos	M+ACN+H	C47H72O20	0.641114	87.2296	100 - 52.4 - 17.6 - 4.41 - 0.911 - 0.161	HMDB0031024	Achyranthoside C	Organic compounds	Lipids and lipid-like molecules	Prenol lipids	231.364	149.087	174.129	252.261	112.067	98.5489	125.565	89.3752	139.064	72.9391	72.8224	29.965	80.3152	17.1708	50.1265	32.2756	23.4747	24.4995	24.8202	20.3819	11.0393	15.6685	26.8736	8.57335	6.53539e-06	0.669359	s
2.45_508.2460m/z	508.246	2.45282	neg	M-H	C29H31N7O2	-1.22882	91.1621	100 - 34.4 - 6.14 - 0.758	HMDB0013864	CGP71422	Organic compounds	Benzenoids	Benzene and substituted derivatives	382.449	254.706	182.183	416.864	264.543	177.738	47.9546	159.86	219.171	17.7472	155.558	142.969	171.713	180.212	231.453	182.262	153.263	222.324	55.4462	86.8565	61.1231	36.4379	64.7534	39.6297	7.15383e-05	0.664424	s
5.01_271.2267m/z	271.227	5.01367	neg	M+FA-H	C15H30O	-5.27539	94.783	100 - 16.6 - 1.5	HMDB0059813	Heptyl ketone	Organic compounds	Organic oxygen compounds	Organooxygen compounds	105.033	138.109	148.952	115.654	157.072	167.742	322.205	251.221	284.623	324.23	252.8	326.373	202.614	261.719	158.361	212.749	277.152	174.149	381.929	308.857	304.713	402.244	395.248	325.06	4.46952e-08	0.661241	s
4.77_597.3028m/z	597.303	4.77152	neg	M-H	C27H51O12P	-2.93321	89.6854	100 - 30.2 - 6.88 - 1.16 - 0.165	HMDB0061693	1-Oleoylglycerophosphoinositol	Organic compounds	Lipids and lipid-like molecules	Glycerophospholipids	712.662	1427.41	1499.66	706.499	1436.83	1485.11	750.34	491.424	598.535	647.989	534.11	492.735	3633.31	4217.9	2981.67	3899.67	4446.57	3436.12	1003.32	927.119	758.456	939.359	938.349	653.313	1.30293e-12	0.658352	s
2.31_717.3867m/z	717.387	2.31067	pos	M+K	C33H62N2O12	-9.99138	86.7187	100 - 37.6 - 9.34 - 1.74 - 0.267	HMDB0060814	Descladinose roxithromycin	Organic compounds	Organic oxygen compounds	Organooxygen compounds	447.967	500.41	437.218	439.1	488.075	377.594	449.675	395.475	569.254	425.233	411.25	399.81	494.956	505.047	226.054	300.925	455.138	244.375	233.406	361.517	280.903	273.128	272.102	234.068	0.0036682	0.657573	s
2.24_1075.4344m/z	1075.43	2.23923	neg	M-H	C43H84O22P4	1.07703	90.8275	100 - 48.3 - 15.9 - 3.94 - 0.812 - 0.144	HMDB0010151	PIP3(18:0/16:1(9Z))	Organic compounds	Lipids and lipid-like molecules	Glycerophospholipids	192.539	207.52	139.944	212.313	205.877	163.05	21.4671	188.413	141.379	30.8732	176.739	143.7	99.6133	102.472	135.393	131.364	55.5604	180.878	23.6382	35.5741	9.45362	19.8111	21.3535	4.1368	3.45533e-05	0.655728	s
1.18_246.1209n	227.103	1.17988	neg	M-H2O-H, M-H, M+Na-2H	C10H18N2O5	-2.67358	88.694	100 - 11.9 - 1.68 - 0.144	HMDB0029126	Valyl-Glutamate	Organic compounds	Organic acids and derivatives	Carboxylic acids and derivatives	421.778	436.549	478.327	500.234	584.088	661.858	245.83	449.026	407.109	291.695	639.936	578.288	530.996	451.029	544.151	738.469	575.385	738.786	199.155	195.023	93.6181	242.286	274.456	137.784	2.96195e-05	0.655027	s
0.50_424.1924n	407.189	0.496983	pos	M+H-H2O, M+H	C25H28O6	8.87991	77.2448	100 - 27.6 - 4.89 - 0.65	HMDB0132647	2-(2,4-dihydroxyphenyl)-5,7-dihydroxy-6-(3-methylbut-1-en-1-yl)-3-(3-methylbut-2-en-1-yl)-3,4-dihydro-2H-1-benzopyran-4-one	Organic compounds	Phenylpropanoids and polyketides	Flavonoids	91.8967	90.6459	120.816	93.1679	130.787	144.547	228.005	129.237	99.1208	272.275	162.996	113.848	137.987	172.225	252.605	146.022	173.534	202.439	213.332	250.288	350.449	216.94	265.668	421.53	0.000507921	0.653145	s
0.89_402.1807m/z	402.181	0.887717	neg	M+Cl	C18H29N3O5	1.64156	94.5056	100 - 21.1 - 3.14 - 0.351	HMDB0015478	Bambuterol	Organic compounds	Benzenoids	Benzene and substituted derivatives	340.171	257.351	387.605	346.395	344.937	465.343	9.17746	194.568	138.764	16.6282	318.055	172.155	319.149	82.0059	524.609	410.919	102.169	655.993	10.6951	30.4909	7.62178	3.05379	13.0596	4.2514	0.000390289	0.651074	s
2.18_427.2010m/z	427.201	2.17567	pos	M+2Na	C42H64O15	-1.19054	61.3554	100 - 46.7 - 13.8 - 3.03 - 0.546	HMDB0038739	Licoricesaponin B2				113.751	142.791	117.977	157.861	239.005	158.734	161.691	198.793	243.933	192.509	266.618	326.012	231.721	297.893	232.38	227.538	346.779	378.131	234.988	373.502	247.168	293.732	385.349	337.154	0.00090636	0.642453	s
0.61_150.0518n	195.05	0.610567	neg	M-H, M+FA-H, M+Cl	C5H10O5	-6.6202	96.0691	100 - 5.71 - 1.16	HMDB0094694	beta-Arabinose	Organic compounds	Organic oxygen compounds	Organooxygen compounds	100.025	208.139	176.574	107.598	272.831	285.348	355.892	211.797	323.915	327.677	404.722	502.953	288.353	260.898	276.827	434.591	641.042	338.602	390.461	336.947	330.817	588.839	404.708	369.158	0.0120388	0.640371	s
3.21_290.2696m/z	290.27	3.2136	pos	M+NH4	C16H32O3	2.44973	95.0065	100 - 17.8 - 2.1 - 0.187	HMDB0006294	16-Hydroxy hexadecanoic acid	Organic compounds	Lipids and lipid-like molecules	Fatty Acyls	116.506	187.747	198.654	182.705	338.716	366.82	315.256	221.94	252.342	387.935	323.431	390.636	371.842	474.164	398.537	443.256	566.958	397.853	403.824	345.758	376.903	412.711	332.644	463.928	0.000500533	0.639364	s
2.49_657.3613m/z	657.361	2.48855	pos	M+H-2H2O	C29H48N12O8	4.86814	79.4215	100 - 36.6 - 8.17 - 1.35 - 0.182	HMDB0059792	Opiorphin	Organic compounds	Organic acids and derivatives	Carboxylic acids and derivatives	250.935	204.757	159.435	208.496	85.7247	174.296	72.0191	154.686	162.242	45.4289	96.1871	118.943	79.0937	57.1716	42.98	76.3433	75.6984	80.4658	54.5642	50.9075	27.3422	34.0469	48.1375	27.3329	1.74941e-05	0.637468	s
2.27_1338.7423m/z	1338.74	2.27495	neg	M-H2O-H	C62H121NO26P2	-3.7151	89.562	100 - 69.8 - 29.3 - 9.15 - 2.32 - 0.503	HMDB0012256	Mannosyl-diinositol-phosphorylceramide	Organic compounds	Lipids and lipid-like molecules	Sphingolipids	334.565	207.422	67.7375	289.558	218.112	68.8322	15.0494	172.222	89.0123	17.7397	182.804	98.3431	35.975	104.348	166.444	73.7392	144.997	179.016	18.5877	17.5572	1.80553	13.4427	5.98622	10.0004	0.00236523	0.635364	s
2.74_852.4414m/z	852.441	2.73713	pos	M+ACN+H	C41H62O16	4.7179	72.7914	100 - 45.7 - 13.5 - 2.98 - 0.542	HMDB0033427	Betavulgaroside VII	Organic compounds	Lipids and lipid-like molecules	Prenol lipids	336.003	225.62	311.765	300.247	323.353	303.841	118.208	352.642	219.647	37.8543	255.174	278.295	370.162	134.464	165.15	286.394	146.163	155.228	115.919	125.007	63.3873	180.121	62.0596	103.235	0.00534465	0.628067	s
2.35_515.2831m/z	515.283	2.34637	neg	M+FA-H	C26H38N4O4	-9.37285	88.3781	100 - 30.2 - 5.22 - 0.66	HMDB0029340	Ceanothine C	Organic compounds	Organic acids and derivatives	Carboxylic acids and derivatives	620.974	568.108	485.641	663.624	609.136	552.688	288.161	516.713	414.272	295.552	542.603	460.155	519.397	420.016	585.76	563.847	444.115	599.777	338.119	315.353	307.09	419.969	374.46	335.48	0.000140867	0.625739	s
2.31_415.2507m/z	415.251	2.31067	neg	M+FA-H	C24H34O3	4.60181	93.882	100 - 26.5 - 3.98 - 0.436	HMDB0015033	Rimexolone	Organic compounds	Lipids and lipid-like molecules	Steroids and steroid derivatives	368.662	354.48	358.648	384.171	411.525	375.629	125.727	360.537	287.455	113.848	378.418	309.44	335.823	216.726	346.725	402.881	208.895	397.278	131.317	178.438	169.623	129.941	201.677	161.952	0.000547921	0.624629	s
4.04_512.2977m/z	512.298	4.03862	neg	M+FA-H	C22H46NO7P	-3.59245	95.559	100 - 25 - 4.42 - 0.586	HMDB0010379	LysoPC(14:0/0:0)	Organic compounds	Lipids and lipid-like molecules	Glycerophospholipids	144.294	274.7	322.379	165.461	269.239	342.867	445.017	365.696	377.806	424.588	382.68	370.446	331.672	382.934	304.351	358.75	356.559	353.841	364.28	419.044	494.12	385.157	453.189	502.141	6.88885e-05	0.621217	s
4.40_525.2825n	570.279	4.4015	neg	M+Cl, M+FA-H	C27H44NO7P	-5.74294	87.2405	100 - 30.3 - 5.88 - 0.854 - 0.101	HMDB0011526	LysoPE(22:6(4Z,7Z,10Z,13Z,16Z,19Z)/0:0)	Organic compounds	Lipids and lipid-like molecules	Glycerophospholipids	1.20699	16.3892	28.7219	1.77716	11.7161	27.1801	555.626	357.064	367.627	481.107	337.902	331.65	22.0773	24.746	18.3503	5.47305	5.96881	5.4977	455.631	420.067	440.231	380.255	410.497	366.068	3.4609e-13	0.620917	s
0.76_203.0535m/z	203.053	0.759867	pos	2M+Na	C3H6O3	4.76379	97.8507	100 - 3.43 - 0.658	HMDB0144295	2-hydroxypropanoic acid	Organic compounds	Organic acids and derivatives	Hydroxy acids and derivatives	131.797	181.695	123.704	232.256	232.664	366.39	386.134	265.544	163.348	381.562	407.364	221.701	290.657	312.163	177.191	218.949	347.436	359.595	358.114	306.525	735.389	276.714	329.626	659.226	0.0315579	0.619893	s
0.55_603.3444m/z	603.344	0.546283	neg	M+Cl	C35H52O6	-2.42517	77.4509	100 - 38.7 - 8.51 - 1.36 - 0.175	HMDB0038387	33-Deoxy-33-hydroperoxyfurohyperforin	Organic compounds	Lipids and lipid-like molecules	Prenol lipids	302.485	241.844	29.579	268.295	172.809	44.6834	64.6269	63.0714	65.9559	56.8877	80.813	92.2068	39.8401	35.0973	76.1622	30.5231	169.897	38.1054	15.3741	31.9855	4.54891	9.59106	8.44884	2.4071	0.00237827	0.619782	s
2.06_968.4598m/z	968.46	2.06137	neg	M-H2O-H	C45H69N11O12S	-7.26602	75.9115	100 - 54.7 - 21.7 - 6.37 - 1.5 - 0.296	HMDB0015402	Carbetocin	Organic compounds	Organic acids and derivatives	Carboxylic acids and derivatives	307.468	151.553	126.251	294.877	136.207	115.195	12.5781	117.091	96.2342	4.89364	155.086	67.2673	68.2374	29.4613	127.439	68.6354	37.4974	170.872	16.1525	16.3569	18.4917	6.8789	30.7267	20.5819	0.000803961	0.618852	s
2.47_442.2386n	885.448	2.47427	pos	M+Na, 2M+H	C26H34O6	6.82537	83.1616	100 - 28.7 - 5.21 - 0.707	HMDB0039064	Pectachol	Organic compounds	Phenylpropanoids and polyketides	Coumarins and derivatives	221.218	184.284	163.897	235.344	211.41	75.4315	53.226	138.032	92.7346	11.1801	61.8473	21.9207	87.8924	56.3356	21.243	44.8681	16.2032	39.7771	29.7016	25.0483	38.1348	7.83745	7.03942	76.0832	1.16127e-05	0.61575	s
2.08_263.1386m/z	263.139	2.0828	neg	M-H	C14H20N2O3	-5.68551	90.5907	100 - 16.2 - 1.85 - 0.158	HMDB0029008	Phenylalanyl-Valine	Organic compounds	Organic acids and derivatives	Carboxylic acids and derivatives	449.23	105.673	87.072	517.812	139.668	120.935	18.7121	94.8721	155.485	24.4515	115.455	215.879	93.7933	108.703	138.603	124.263	136.508	171.353	22.8557	40.2614	14.598	30.5005	37.3458	22.6335	0.0208131	0.612068	s
0.82_424.2062n	459.219	0.817	neg	M-H, M+Cl, M-H2O-H	C22H32O8	-8.38936	58.548	100 - 24.5 - 4.51 - 0.615	HMDB0039013	8beta-Angeloyloxy-15-hydroxy-1alpha,10R-dimethoxy-3-oxo-11(13)-germacren-12,6alpha-olide	Organic compounds	Lipids and lipid-like molecules	Prenol lipids	391.449	162.688	132.424	399.689	191.321	132.142	39.2148	72.0263	56.9038	62.9543	126.956	37.7874	48.5462	72.9461	181.559	69.8325	99.7778	216.746	30.593	61.5694	48.7422	10.2405	31.0769	48.2849	0.000918069	0.60694	s
4.06_372.3115m/z	372.311	4.06008	pos	M+ACN+H	C19H38O4	1.99069	97.6647	100 - 21.1 - 2.95 - 0.308	HMDB0072873	MG(0:0/i-16:0/0:0)	Organic compounds	Lipids and lipid-like molecules	Glycerolipids	279.888	274.174	610.801	422.006	452.076	889.913	784.585	650.258	773.241	1040.47	817.339	1137.8	1243.53	1076.26	1091.56	1420.96	1299.83	1402.79	705.346	760.263	484.26	765.037	876.097	503.885	4.32069e-06	0.602565	s
4.56_546.2796m/z	546.28	4.55793	neg	M+Na-2H	C24H48NO9P	-3.21974	92.239	100 - 27.2 - 5.41 - 0.801	HMDB0061698	1-Stearoylglycerophosphoserine	Organic compounds	Lipids and lipid-like molecules	Glycerophospholipids	438.716	1051.92	1127.88	402.656	1022.44	1069.42	1029.83	753.787	812.567	870.133	760.802	638.773	1314.89	1888.12	1160.06	1306.02	1646.64	1223.3	1036.85	1083.46	989.258	859.283	901.747	980.096	0.00068225	0.600215	s
3.05_389.0239m/z	389.024	3.05	neg	2M+FA-H	C3H9O6P	-4.71393	81.2943	100 - 3.58 - 1.28	HMDB0002520	Beta-Glycerophosphoric acid	Organic compounds	Lipids and lipid-like molecules	Glycerophospholipids	183.132	190.701	184.096	175.662	176.056	179.952	382.187	243.798	155.716	311.971	253.319	111.345	249.543	324.202	249.084	212.304	256.133	245.983	272.923	338.527	492.187	251.178	257.944	514.584	0.0109892	0.599708	s
2.57_816.4347m/z	816.435	2.57355	pos	M+ACN+H	C40H54N8O8	-7.25593	76.1525	100 - 47.1 - 12.5 - 2.41 - 0.37	HMDB0001038	Angiotensin IV	Organic compounds	Organic acids and derivatives	Carboxylic acids and derivatives	262.178	270.664	355.121	337.566	222.632	451.203	368.478	261.485	148.958	469.265	246.476	130.795	214.363	163.354	126.399	237.866	73.6703	232.225	186.777	179.322	197.258	123.696	136.208	168.69	0.0136493	0.599455	s
2.37_407.1220m/z	407.122	2.37423	neg	2M-H	C8H12O6	6.11764	96.9819	100 - 9.02 - 1.59 - 0.119	HMDB0041031	3,5,6-Trihydroxy-5-(hydroxymethyl)-2-methoxy-2-cyclohexen-1-one	Organic compounds	Organic oxygen compounds	Organooxygen compounds	162.222	208.007	150.224	156.582	197.334	128.555	89.3166	156.645	146.776	72.7256	166.836	136.14	81.541	102.277	81.7507	115.952	91.334	91.366	55.2068	61.7976	71.5825	30.9379	50.5014	50.6396	2.36773e-06	0.597344	s
4.38_496.3363n	497.344	4.3801	pos	M+H, M+Na	C24H51NO7P+	-8.08856	84.1987	100 - 27.2 - 4.99 - 0.688	HMDB0062541	1-palmitoylglycerophosphocholine	Organic compounds	Lipids and lipid-like molecules	Glycerophospholipids	58.0066	111.266	138.707	58.1302	140.629	139.254	385.843	280.939	305.717	419.568	382.302	426.037	187.025	201.073	160.617	217.47	238.714	232.085	378.703	349.86	317.576	414.031	363.293	307.29	2.18544e-09	0.596149	s
2.55_811.3156m/z	811.316	2.55212	neg	2M+FA-H	C19H21N5O4	-1.7329	87.9926	100 - 22.8 - 3.3 - 0.358	HMDB0014600	Prazosin	Organic compounds	Organoheterocyclic compounds	Diazinanes	427.501	419.264	406.924	513.786	429.476	442.96	218.586	462.142	381.947	234.711	504.07	388.667	445.114	378.968	524.494	435.452	376.773	570.576	189.764	287.87	173.31	185.121	294.264	167.125	0.000123364	0.596125	s
2.30_344.1824m/z	344.182	2.30352	neg	3M-H	C5H9NO2	-0.874845	99.5399	100 - 5.95 - 0.558	HMDB0003411	D-Proline	Organic compounds	Organic acids and derivatives	Carboxylic acids and derivatives	440.495	230.68	232.729	534.469	286.541	282.987	74.3343	220.465	227.202	86.361	236.334	271.471	270.092	172.455	354.741	319.605	176.084	390.048	86.5519	135.54	93.4325	79.3508	150.856	91.3061	0.00125503	0.59534	s
3.98_498.2608m/z	498.261	3.97505	neg	M+Na-2H	C23H44NO7P	1.22947	92.3994	100 - 26 - 4.69 - 0.633	HMDB0011507	LysoPE(18:2(9Z,12Z)/0:0)	Organic compounds	Lipids and lipid-like molecules	Glycerophospholipids	139.499	338.219	545.772	141.799	378.141	629.374	267.447	169.105	118.744	279.703	186.118	103.616	286.015	213.516	239.446	321.824	197.141	298.863	139.285	103.669	107.222	153.048	108.5	117.209	0.00814862	0.593604	s
2.22_398.2245m/z	398.224	2.21782	pos	M+ACN+H	C21H28N2OS	-4.44963	30.7826	100 - 24.6 - 7.62 - 1.34 - 0.17	HMDB0061718	3-Methylthiofentanyl	Organic compounds	Benzenoids	Benzene and substituted derivatives	253.968	222.278	265.319	277.092	140.639	129.635	54.0936	245.721	234.955	44.2309	121.346	233.958	254.076	103.27	121.818	107.262	104.86	86.7912	43.1479	61.6473	108.355	59.3481	54.4107	32.34	0.0057549	0.591993	s
0.62_174.0399m/z	174.04	0.62485	neg	M+FA-H	C5H7NO3	-6.58648	96.6958	100 - 5.97 - 0.765	HMDB0060262	5-Oxoprolinate	Organic compounds	Organic acids and derivatives	Carboxylic acids and derivatives	82.9223	177.817	163.365	82.0201	227.105	231.658	293.744	243.503	287.392	354.499	344.841	422.528	248.763	266.125	210.833	299.665	413.332	273.291	327.263	296.785	280.48	435.499	433.189	304.675	0.000517471	0.587775	s
2.04_624.3253m/z	624.325	2.03995	pos	M+H-2H2O	C32H53NO11S	7.90205	79.901	100 - 36.8 - 13.4 - 3.22 - 0.644 - 0.106	HMDB0002429	(3a,5b)-24-oxo-24-[(2-sulfoethyl)amino]cholan-3-yl-b-D-Glucopyranosiduronic acid	Organic compounds	Lipids and lipid-like molecules	Steroids and steroid derivatives	409.663	271.182	190.747	308.95	177.429	148.073	49.8159	143.945	114.298	17.1255	163.721	52.4598	145.346	90.6549	145.065	114.285	90.362	261.94	72.7396	101.394	27.363	28.0469	101.173	42.8502	0.000558913	0.587613	s
4.26_388.1539m/z	388.154	4.25935	neg	M+FA-H	C18H21N3O4	7.15208	97.1332	100 - 21 - 2.91 - 0.304	HMDB0032224	N1-(2,4-Dimethoxybenzyl)-n2-(2-(pyridin-2-yl) ethyl)oxalamide	Organic compounds	Organic acids and derivatives	Carboxylic acids and derivatives	615.545	1292.32	1567.81	747.133	1640.3	1821.68	1717.63	1324.84	1297.98	1768.15	1574.13	1319.7	2074.86	2161.97	1447.89	2427.98	2194.57	1528.34	1252.19	1713.63	1160.04	1447.26	2202.74	1110.56	0.0405508	0.586854	s
4.90_585.3504m/z	585.35	4.89938	neg	M+Na-2H	C29H57O8P	-5.96645	83.9867	100 - 32.3 - 6.7 - 1.04 - 0.132	HMDB0115691	PA(8:0/i-18:0)	Organic compounds	Lipids and lipid-like molecules	Glycerophospholipids	21.4202	126	104.83	21.1821	104.471	123.732	246.615	122.706	137.348	235.659	110.527	138.356	107.389	185.925	96.0938	98.3354	161.67	93.2271	247.147	211.043	298.73	238.794	220.381	285.981	4.054e-05	0.586695	s
3.01_365.1159m/z	365.116	3.01498	neg	M+Cl	C19H22O5	-0.568942	90.2625	100 - 21 - 3.12 - 0.347	HMDB0130296	2-(2-hydroxypropan-2-yl)-6-[2-(oxiran-2-yl)propan-2-yl]-2H,3H,7H-furo[3,2-g]chromen-7-one				89.9674	69.3823	101.545	117.296	120.725	141.395	213.259	123.996	80.0161	269.72	181.83	112.552	121.259	144.86	126.229	153.702	193.811	166.977	183.071	199.962	315.41	228.124	261.843	424.321	0.00119401	0.58654	s
0.85_713.0290m/z	713.029	0.852717	neg	2M+FA-H	C15H10O7S	2.08786	88.3496	100 - 17.4 - 7.38 - 1.07 - 0.176	HMDB0137537	{4-[(6-hydroxy-3-oxo-2,3-dihydro-1-benzofuran-2-ylidene)methyl]phenyl}oxidanesulfonic acid	Organic compounds	Phenylpropanoids and polyketides	Aurone flavonoids	393.708	715.275	747.78	374.761	782.26	870.088	1012.43	774.736	854.281	1139.76	927.87	1057.29	682.36	995.305	629.986	912.223	1177.43	738.448	910.403	843.553	747.817	1134.75	1106.73	858.915	0.0286094	0.58515	s
3.01_514.2836m/z	514.284	3.00785	neg	M-H	C26H45NO7S	-1.60009	83.4297	100 - 30.1 - 10.3 - 2.16 - 0.372	HMDB0011637	Taurohyocholate	Organic compounds	Lipids and lipid-like molecules	Steroids and steroid derivatives	150.5	124.816	148.167	152.53	145.409	152.913	260.447	152.577	133.021	262.846	196.321	128.607	155.937	230.611	193.071	206.937	217.934	233.698	210.49	239.456	372.357	233.034	243.99	441.369	0.00296619	0.583532	s
2.59_307.1644m/z	307.164	2.59497	neg	M+FA-H	C12H24NO5+	2.74873	87.8989	100 - 13.8 - 1.91 - 0.176	HMDB0061189	3-Hydroxyisovalerylcarnitine	Organic compounds	Lipids and lipid-like molecules	Fatty Acyls	98.7573	97.7687	114.513	109.237	112.955	126.29	297.669	165.288	79.8736	266.496	180.827	92.2049	118.681	150.181	186.512	116.987	151.442	193.193	184.921	252.178	445.287	188.647	241.245	424.217	0.00358334	0.583423	s
4.90_600.4688m/z	600.469	4.89942	pos	2M+NH4	C18H29NO2	-8.11655	90.8099	100 - 20.2 - 2.35 - 0.201	HMDB0015447	Penbutolol	Organic compounds	Benzenoids	Phenol ethers	240.711	242.025	465.425	293.959	331.995	581.937	543.716	451.931	392.875	764.91	515.525	589.446	631.68	498.323	681.184	780.918	603.247	669.518	428.587	504.567	621.77	524.4	454.444	663.478	0.0033128	0.582584	s
1.16_201.1235m/z	201.124	1.15845	neg	M-H	C9H18N2O3	-4.76871	90.6605	100 - 10.8 - 1.14	HMDB0028922	Leucyl-Alanine	Organic compounds	Organic acids and derivatives	Carboxylic acids and derivatives	278.391	104.033	89.8061	327.001	133.89	132.051	19.5129	91.1798	108.578	24.7449	120.113	162.984	90.6194	89.9368	118.718	115.069	98.6078	163.746	13.6906	23.4967	3.82659	11.4037	23.3987	8.65959	0.0011585	0.582291	s
0.50_683.2654m/z	683.265	0.504133	neg	M-H	C36H44O13	-8.06984	93.8996	100 - 39.9 - 10.4 - 2.04 - 0.33	HMDB0129829	6-{[2-(2,4-dihydroxyphenyl)-3-[5-(3,3-dimethyloxiran-2-yl)-3-methylpent-2-en-1-yl]-7-hydroxy-6-(3-methylbut-2-en-1-yl)-4-oxo-3,4-dihydro-2H-1-benzopyran-5-yl]oxy}-3,4,5-trihydroxyoxane-2-carboxylic acid	Organic compounds	Phenylpropanoids and polyketides	Flavonoids	265.155	413.737	463.45	262.447	457.4	543.575	510.927	410.802	484.187	647.458	539.889	568.308	511.191	661.101	465.362	682.177	769.947	496.059	501.481	475.711	516.074	645.157	681.804	578.965	0.0169891	0.579618	s
2.31_717.4819m/z	717.482	2.31067	pos	M+K	C44H70O5	-5.23994	61.0613	100 - 48.6 - 12.6 - 2.29 - 0.326	HMDB0056295	DG(18:2n6/0:0/22:6n3)	Organic compounds	Lipids and lipid-like molecules	Glycerolipids	36.7594	210.291	390.203	21.4817	332.345	496.859	408.473	320.369	475.965	493.198	445.358	497.323	527.713	620.947	312.744	467.992	620.876	487.977	421.52	481.041	444.264	477.317	392.102	390.768	0.00793587	0.572456	s
2.08_375.1669m/z	375.167	2.0828	neg	M+FA-H	C16H26O7	2.48625	78.3842	100 - 17.9 - 2.94 - 0.336	HMDB0039056	(4S,6R)-p-Mentha-1,8-diene-6,7-diol 7-glucoside	Organic compounds	Lipids and lipid-like molecules	Prenol lipids	324.609	203.475	161.119	385.415	212.486	184.482	75.7915	164.009	125.367	60.5814	179.41	135.764	151.725	128.059	197.371	178.016	100.828	229.567	72.5896	95.6723	77.5842	45.2826	102.847	81.8883	0.000449102	0.56842	s
1.07_217.1184m/z	217.118	1.07273	neg	M-H	C9H18N2O4	-4.6541	89.0612	100 - 10.8 - 1.35 - 0.104	HMDB0041313	Pantothenamide	Organic compounds	Organic acids and derivatives	Carboxylic acids and derivatives	341.192	209.797	209.244	396.769	271.285	289.369	100.42	188.707	173.3	120.184	260.794	257.736	188.439	182.6	272.537	276.021	231.722	375.617	83.6866	100.643	65.896	113.931	136.848	89.6165	0.000212803	0.567409	s
0.87_707.0095m/z	707.009	0.873433	neg	3M-H	C5H8N4O3S2	7.65848	83.4915	100 - 8.68 - 9.99 - 0.773 - 0.33	HMDB0014841	Methazolamide	Organic compounds	Organoheterocyclic compounds	Azoles	141.023	357.216	409.881	113.046	397.453	487.397	577.711	364.799	464.741	620.81	540.527	591.587	342.041	574.864	272.126	456.353	682.553	330.734	519.897	477.977	419.404	728.478	633.906	548.625	0.0252516	0.56465	s
3.76_237.1484m/z	237.148	3.76147	neg	M+Na-2H	C12H24O3	5.46833	94.2846	100 - 13.4 - 1.44 - 0.113	HMDB0002059	12-Hydroxydodecanoic acid	Organic compounds	Organic acids and derivatives	Hydroxy acids and derivatives	9.03875	5.80656	15.1824	6.87273	9.56827	10.92	137.616	116.547	131.938	149.87	119.232	135.349	11.8949	20.3481	10.5058	6.63021	21.2851	8.12444	232.77	201.373	160.015	258.713	221.23	166.255	2.50987e-13	0.560143	s
2.56_1169.5595m/z	1169.56	2.55925	neg	2M-H	C29H39N5O8	6.06287	75.9439	100 - 33.9 - 7.23 - 1.15 - 0.149	HMDB0014700	Tigecycline	Organic compounds	Phenylpropanoids and polyketides	Tetracyclines	279.288	293.709	284.747	275.585	297.061	271.764	168.84	310.356	223.89	121.701	299.612	193.051	269.678	113.001	244.703	265.908	118.277	272.325	108.841	166.867	160.159	93.2777	155.188	150.927	0.00252165	0.559841	s
2.46_421.2055m/z	421.206	2.45995	neg	M-H	C19H34O10	-5.67318	95.4811	100 - 21.3 - 4.22 - 0.576	HMDB0032960	1-Octen-3-yl primeveroside	Organic compounds	Lipids and lipid-like molecules	Fatty Acyls	324.157	179.033	138.831	385.515	195.089	131.832	50.2657	138.944	170.399	35.0626	162.21	178.815	135.97	228.145	157.591	175.029	211.409	171.6	76.0919	91.0492	30.3111	39.8307	58.7027	29.1306	0.00117564	0.555241	s
5.05_614.4836m/z	614.484	5.04872	pos	M+ACN+H	C35H60N2O4+2	-9.69826	77.9952	100 - 39.4 - 8.39 - 1.27 - 0.15	HMDB0015430	Pancuronium	Organic compounds	Lipids and lipid-like molecules	Steroids and steroid derivatives	112.413	121.735	186.808	108.42	117.529	124.902	193.238	196.222	139.274	133.829	238.106	153.214	180.888	215.566	186.542	159.626	202.056	210.503	189.767	270.054	251.394	208.969	246.194	277.466	8.12125e-05	0.553322	s
1.41_267.1372m/z	267.137	1.4142	pos	2M+Na	C8H10O	6.84421	94.5042	100 - 8.81 - 0.546	HMDB0059873	3-Ethylphenol	Organic compounds	Benzenoids	Phenols	170.325	128.744	132.117	263.677	165.844	165.017	66.3133	116.408	140.185	32.0675	120.583	159.422	100.56	96.3596	206.548	138.993	52.7412	163.858	63.8844	44.9374	16.7622	19.0546	4.01465	21.9282	0.000237862	0.552822	s
0.82_433.1911m/z	433.191	0.817	neg	M+Cl	C23H30N2O4	2.96997	94.909	100 - 26.1 - 4.09 - 0.476	HMDB0041984	Pholcodine	Organic compounds	Alkaloids and derivatives	Morphinans	472.267	160.226	123.159	527.039	193.945	163.829	91.9303	95.5013	78.5563	117.804	160.588	96.9419	53.1476	115.61	231.76	93.0444	200.059	305.293	57.0444	93.8779	63.4683	74.2744	96.7098	73.0405	0.0164321	0.552767	s
2.18_327.1336m/z	327.134	2.17565	neg	M-H	C18H20N2O4	-4.40703	90.3209	100 - 20.6 - 2.83 - 0.293	HMDB0029112	Tyrosyl-Phenylalanine	Organic compounds	Organic acids and derivatives	Carboxylic acids and derivatives	208.165	120.4	138.362	248.843	141.654	167.827	21.7006	107.784	123.671	18.6314	128.72	166.559	131.728	101.625	156.739	168.273	97.3828	197.694	6.42882	20.3014	10.7291	9.43763	24.0439	4.53201	2.42439e-05	0.551625	s
2.15_775.3990m/z	775.399	2.14708	neg	M+Cl	C39H64O13	-6.84081	76.7233	100 - 43.4 - 11.9 - 2.42 - 0.406	HMDB0029623	Torvoside C	Organic compounds	Lipids and lipid-like molecules	Steroids and steroid derivatives	200.052	115.773	54.8474	261.93	128.942	56.5802	3.0811	59.5503	55.7644	4.82797	54.4317	70.8988	26.6882	19.8186	58.2326	27.5163	7.33189	98.6404	3.73577	4.52603	0.948977	4.42408	11.0113	2.26075	0.000618805	0.549347	s
6.59_527.4027m/z	527.403	6.5924	pos	M+H+Na	C69H106O6	9.66907	80.9261	100 - 76.1 - 29.8 - 7.97 - 1.64 - 0.276	HMDB0055933	TG(22:6(4Z,7Z,10Z,13Z,16Z,19Z)/22:2(13Z,16Z)/22:6(4Z,7Z,10Z,13Z,16Z,19Z))	Organic compounds	Lipids and lipid-like molecules	Glycerolipids	626.697	606.166	630.733	787.662	843.384	801.252	1104.46	982.624	667.541	1217.88	1302.2	920.868	735.38	894.425	858.098	940.725	955.081	774.165	991.113	982.457	916.502	1096.57	1054.84	1004.94	0.00228119	0.549129	s
2.06_178.0501m/z	178.05	2.06137	neg	M-H2O-H	C9H11NO4	-4.21391	91.6884	100 - 10.4 - 1.31	HMDB0038750	N-Hydroxy-L-tyrosine				80.6749	66.579	77.1089	100.265	92.4043	108.495	164.54	110.538	73.626	195.499	149.058	104.29	79.9447	105.284	122.113	125.809	156.92	143.257	136.685	167.234	277.316	180.333	240.224	341.562	0.000535064	0.546773	s
4.57_427.3666n	428.374	4.57227	pos	M+H, M+Na	C25H49NO4	0.982712	92.0185	100 - 28.1 - 4.63 - 0.561	HMDB0000848	Stearoylcarnitine	Organic compounds	Lipids and lipid-like molecules	Fatty Acyls	47.6519	95.2419	143.701	52.6481	96.1256	170.762	206.915	125.786	170.911	248.39	128.312	246.955	332.541	370.204	246.069	429.135	404.088	295.507	247.302	246.497	149.363	267.607	204.699	164.434	3.34351e-06	0.546178	s
2.96_612.1466n	611.139	2.95785	neg	M-H, M+Na-2H	C20H32N6O12S2	-8.69963	79.5762	100 - 26.2 - 14.8 - 3.22 - 0.876 - 0.154	HMDB0003337	Oxidized glutathione	Organic compounds	Organic acids and derivatives	Carboxylic acids and derivatives	147.634	152.427	167.862	175.704	133.905	161.661	328.057	227.858	138.211	289.101	214.991	94.683	169.382	222.752	225.556	167.628	185.067	237.613	233.173	284.535	471.56	222.061	232.425	457.092	0.010426	0.545815	s
0.57_221.0194m/z	221.019	0.567717	pos	M+CH3OH+H	C3F8	-6.94634	96.8573	100 - 3.24	HMDB0014696	Perflutren	Organic compounds	Organohalogen compounds	Organofluorides	35.4318	65.2787	74.253	40.3166	50.2542	84.7026	287.355	183.476	232.084	329.378	265.096	349.004	110.522	94.2603	98.5718	70.0557	103.653	59.6314	319.879	282.039	283.331	304.847	277.412	297.702	5.03418e-11	0.542813	s
2.74_1062.5555m/z	1062.56	2.74427	neg	M+FA-H	C50H83NO20	6.37632	79.2266	100 - 56.2 - 19.6 - 5.1 - 1.09 - 0.198	HMDB0034205	Demissine	Organic compounds	Lipids and lipid-like molecules	Steroids and steroid derivatives	177.133	131.859	99.326	216.934	163.611	110.201	22.071	126.491	159.419	20.2083	139.866	103.259	145.005	74.1709	133.2	98.0883	76.0769	131.441	21.1304	27.441	26.7531	11.6939	18.6124	13.2308	0.000202937	0.542331	s
2.31_717.5727m/z	717.573	2.31067	pos	M+K	C43H82O5	-9.7859	61.6355	100 - 47.6 - 12.1 - 2.17 - 0.305	HMDB0056113	DG(24:0/0:0/16:1n7)	Organic compounds	Lipids and lipid-like molecules	Glycerolipids	44.8328	267.273	482.226	48.4015	364.61	590.749	551.508	401.563	571.92	630.606	572.982	680.126	524.465	744.635	479.548	499.482	662.526	484.446	440.156	613.091	460.712	439.013	583.067	532.185	0.00935042	0.542101	s
5.08_446.3061n	469.295	5.08443	pos	M+Na, M+K	C27H42O5	6.51526	91.7223	100 - 29.9 - 5.33 - 0.705	HMDB0060129	24-Oxo-1alpha,23,25-trihydroxyvitamin D3	Organic compounds	Lipids and lipid-like molecules	Steroids and steroid derivatives	26.2942	45.9182	87.0251	3.68683	64.6332	70.0347	309.831	138.758	79.7974	321.688	150.418	74.0879	60.1067	28.9562	59.3175	46.6206	12.5393	30.817	375.686	208.497	244.77	406.72	163.073	258.405	4.69867e-05	0.539997	s
2.25_401.1659m/z	401.166	2.24637	neg	3M-H	C5H10O4	-1.39591	96.2112	100 - 5.68 - 0.954	HMDB0127615	3-hydroxy-2-(hydroxymethyl)-2-methylpropanoic acid	Organic compounds	Organic acids and derivatives	Hydroxy acids and derivatives	213.795	192.79	179.601	214.003	196.841	194.305	90.7003	228.43	99.7546	103.526	204.889	98.5371	140.055	105.857	200.14	148.529	47.1846	220.543	57.2147	82.4798	94.8999	50.3404	83.0165	45.7207	0.00101501	0.539452	s
7.45_729.5325n	730.54	7.44603	pos	M+H, M+Na	C40H76NO8P	2.26973	89.5014	100 - 44.8 - 11.4 - 2.13 - 0.318	HMDB0008130	PC(18:2(9Z,12Z)/14:0)	Organic compounds	Lipids and lipid-like molecules	Glycerophospholipids	1176.13	2374.4	1785.78	682.737	2486.2	2020.98	824.188	266.444	669.231	450.547	117.708	543.318	10615.4	8521.61	797.187	12345.1	9840.59	922.209	775.15	303.793	287.364	954.444	189.31	212.869	0.000443593	0.538139	s
2.54_493.2069m/z	493.207	2.53782	neg	M+FA-H	C24H32O8	-2.23917	95.4429	100 - 26.6 - 5.05 - 0.716	HMDB0037041	Melleolide C	Organic compounds	Lipids and lipid-like molecules	Prenol lipids	460.336	125.645	85.4789	625.235	114.054	67.4708	0	83.2742	166.92	5.56137	64.6573	143.177	133.033	188.786	214.713	138.867	198.581	234.427	14.5355	42.4693	10.4137	5.13075	42.9306	9.42886	0.0222339	0.536008	s
2.32_187.0061m/z	187.006	2.3178	neg	M+Na-2H	C6H6N4S	0.404441	87.6747	100 - 8.82 - 4.87 - 0.371	HMDB0060412	6-Methylmercaptopurine	Organic compounds	Organoheterocyclic compounds	Imidazopyrimidines	76.4182	80.0203	80.3631	91.9937	85.7137	114.758	171.706	114.085	69.9895	179.002	140.001	83.8437	105.709	117.117	121.336	132.737	131.73	162.207	129.863	177.812	261	168.053	207.127	309.304	0.00059711	0.535254	s
4.30_295.2265m/z	295.226	4.29507	neg	M+FA-H	C17H30O	-5.64249	93.4656	100 - 18.8 - 1.87 - 0.131	HMDB0041334	8,11-Heptadecadienal	Organic compounds	Lipids and lipid-like molecules	Fatty Acyls	148.305	85.4824	110.648	161.089	126.529	181.759	224.841	153.377	170.01	183.217	239.763	125.764	218.661	216.302	176.017	233.097	251.041	189.52	238.233	231.55	235.693	287.237	307.173	173.329	0.000686797	0.533356	s
2.31_789.2295m/z	789.23	2.31067	pos	M+CH3OH+H	C36H36O18	7.74774	64.7463	100 - 40 - 11.5 - 2.47 - 0.444	HMDB0037437	6''-(4-Hydroxycinnamoyl)astragalin 4'-glucoside	Organic compounds	Phenylpropanoids and polyketides	Flavonoids	54.159	229.421	437.329	29.8208	321.109	647.796	564.384	423.437	565.354	528.88	497.856	632.518	578.837	688.403	424.143	516.826	599.571	481.001	469.688	554.112	508.122	503.204	461.931	409.352	0.0102403	0.533309	s
0.50_343.1451m/z	343.145	0.504133	pos	M+2H	C36H44O13	-3.71335	84.8053	100 - 39.9 - 10.4 - 2.04 - 0.33	HMDB0129834	6-{[3-(3,7-dimethylocta-2,6-dien-1-yl)-7-hydroxy-6-(3-methylbut-2-en-1-yl)-4-oxo-2-(2,4,5-trihydroxyphenyl)-3,4-dihydro-2H-1-benzopyran-5-yl]oxy}-3,4,5-trihydroxyoxane-2-carboxylic acid	Organic compounds	Phenylpropanoids and polyketides	Flavonoids	112.845	189.87	228.035	133.312	260.692	308.348	269.697	201.572	275.278	355.869	254.813	319.244	318.935	426.037	452.904	383.955	442.408	290.922	309.071	323.47	290.948	369.037	301.442	321.138	0.000326701	0.529482	s
0.82_238.0940n	237.087	0.817	neg	M-H, M+FA-H, M-H2O-H	C11H14N2O4	-5.81221	90.7026	100 - 12.9 - 1.59 - 0.134	HMDB0028853	Glycyltyrosine	Organic compounds	Organic acids and derivatives	Carboxylic acids and derivatives	281.912	132.223	136.328	328.007	176.672	176.93	113.176	120.763	132.055	152.453	190.253	161.461	83.9328	134.673	151.455	122.747	183.367	212.137	64.3914	78.2895	76.1712	71.3715	97.7978	96.5979	0.00305523	0.52737	s
2.58_511.2562m/z	511.256	2.58068	neg	M+Na-2H	C24H42O10	7.57337	80.6674	100 - 26.8 - 5.51 - 0.835 - 0.107	HMDB0060118	12-Hydroxy-13-O-D-glucuronoside-octadec-9Z-enoate	Organic compounds	Lipids and lipid-like molecules	Saccharolipids	174.729	122.2	101.657	212.548	117.529	106.762	27.2939	93.3508	121.527	22.1327	73.3158	89.849	102.66	56.5756	78.9209	93.4911	45.5318	93.2398	29.2338	31.1865	24.1502	14.985	27.1956	14.8382	5.49584e-05	0.527185	s
2.45_311.1385m/z	311.138	2.45282	neg	M+Na-2H	C16H22N2O3	2.61142	93.7818	100 - 18.4 - 2.21 - 0.2	HMDB0015453	Procaterol	Organic compounds	Organoheterocyclic compounds	Quinolines and derivatives	227.917	95.7713	87.5719	285.138	117.863	96.1655	13.1029	71.9859	124.126	9.65912	87.5637	160.059	87.2897	90.1839	91.0078	97.997	107.508	130.303	14.6486	15.702	8.15907	17.0352	15.4355	7.07017	0.00169711	0.526511	s
5.18_379.1564m/z	379.156	5.1844	neg	M-H2O-H	C23H26O6	3.28997	99.0239	100 - 25.4 - 4.33 - 0.553	HMDB0132662	2-(3,5-dimethoxyphenyl)-5-hydroxy-7-methoxy-6-(3-methylbut-2-en-1-yl)-3,4-dihydro-2H-1-benzopyran-4-one	Organic compounds	Phenylpropanoids and polyketides	Flavonoids	217.924	295.886	259.617	254.012	275.567	230.808	415.572	327.88	379.665	398.976	325.463	332.815	403.983	544.254	203.052	409.76	540.003	222.872	397.326	373.251	406.521	409.654	362.76	459.748	0.0199546	0.523017	s
2.21_332.1636m/z	332.164	2.21067	neg	M+FA-H	C21H21N	-6.89403	74.7605	100 - 23.3 - 2.6 - 0.183	HMDB0014578	Cyproheptadine	Organic compounds	Benzenoids	Dibenzocycloheptenes	443.984	203.779	147.434	506.099	223.657	135.93	19.8032	133.144	145.395	29.0614	119.478	161.258	237.038	197.181	261.887	227.107	205.264	294.156	52.9473	90.4777	50.1873	48.5284	84.9679	44.9781	0.000790973	0.520663	s
0.82_302.1375n	301.13	0.817	neg	M-H, M+FA-H	C14H22O7	3.17858	65.6129	100 - 15.7 - 2.58 - 0.277	HMDB0040462	Garcinia lactone dibutyl ester	Organic compounds	Organic acids and derivatives	Carboxylic acids and derivatives	314.156	142.106	141.987	392.999	182.572	171.958	74.1407	87.8103	73.6275	89.0602	163.211	83.5731	98.5346	87.6037	219.18	132.94	107.377	254.861	47.4959	78.2265	64.3589	52.4649	77.0004	71.3721	0.00233836	0.514118	s
0.61_796.4239m/z	796.424	0.610567	neg	M+Na-2H	C42H66NO10P	8.74341	68.1519	100 - 46.9 - 12.8 - 2.57 - 0.416	HMDB0112496	PS(18:4(6Z,9Z,12Z,15Z)/18:4(6Z,9Z,12Z,15Z))	Organic compounds	Lipids and lipid-like molecules	Glycerophospholipids	296.823	170.831	166.032	312.473	177.71	206.095	111.466	105.462	77.9965	89.1129	206.018	127.682	93.8071	50.8846	191.584	134.42	172.095	246.451	52.0421	96.7934	63.8429	60.0569	126.719	92.9074	0.00230507	0.51117	s
1.36_221.0921m/z	221.092	1.36418	neg	M-H	C11H14N2O3	-4.74752	89.5385	100 - 12.9 - 1.38 - 0.107	HMDB0028848	Glycyl-Phenylalanine	Organic compounds	Organic acids and derivatives	Carboxylic acids and derivatives	455.632	234.996	238.214	528.618	311.952	325.213	154.378	246.357	229.237	184.379	359.592	326.347	253.994	220.917	355.907	355.404	315.11	478.929	119.54	170.989	125.813	162.821	219.768	180.55	0.00533494	0.509897	s
2.58_854.5769m/z	854.577	2.58068	neg	M+Cl	C48H86NO7P	-8.2223	69.2778	100 - 53.5 - 15.5 - 3.18 - 0.514	HMDB0013422	PC(o-18:0/22:6(4Z,7Z,10Z,13Z,16Z,19Z))				121.538	362.808	407.133	202.218	466.992	429.019	492.036	403.611	490.967	545.422	430.857	436.135	519.316	603.473	395.423	498.733	735.147	437.386	518.858	530.939	392.87	481.088	504.014	444.966	0.0156358	0.509056	s
1.17_496.1853m/z	496.185	1.1656	neg	M+FA-H	C23H25N5O5	3.46798	88.3578	100 - 27.2 - 4.58 - 0.577	HMDB0014728	Doxazosin	Organic compounds	Organoheterocyclic compounds	Diazinanes	346.561	188.777	95.053	346.599	204.541	118.145	8.3735	92.4189	76.3535	5.88654	116.704	124.229	111.984	84.9582	172.428	148.634	101.025	214.534	34.9215	57.0569	47.6989	33.2205	51.7933	82.057	0.00120571	0.507003	s
1.16_224.1434n	247.131	1.15847	pos	M+H-2H2O, M+Na	C13H20O3	9.82249	88.0086	100 - 14.4 - 1.58 - 0.128	HMDB0112084	3-Methyl-5-pentyl-2-furanpropanoic acid	Organic compounds	Lipids and lipid-like molecules	Fatty Acyls	298.826	265.384	330.01	423.002	346.57	387.264	247.852	280.901	279.536	217.265	363.621	357.598	358.25	310.744	367.84	365.806	304.251	474.847	186.247	215.209	142.521	179.371	193.935	126.66	2.5508e-05	0.504805	s
2.08_264.1463n	265.154	2.0828	pos	M+H, M+Na	C14H20N2O3	-4.07057	90.4899	100 - 16.2 - 1.85 - 0.158	HMDB0015568	Vorinostat	Organic compounds	Benzenoids	Benzene and substituted derivatives	173.49	98.7048	165.102	248.103	143.429	121.731	77.8268	85.3757	155.876	23.6568	103.11	187.168	94.9657	127.89	186.223	136.557	105.478	140.753	31.9982	49.0565	55.3775	14.9802	15.612	15.526	0.000349736	0.496136	s
4.57_506.3234m/z	506.323	4.56508	neg	M-H	C25H50NO7P	-3.66241	96.516	100 - 28.2 - 5.28 - 0.741	HMDB0011512	LysoPE(20:1(11Z)/0:0)	Organic compounds	Lipids and lipid-like molecules	Glycerophospholipids	741.904	1454.59	1572.15	646.119	1484.58	1558.63	1104.98	768.834	720.024	950.931	800.171	612.935	1908.51	2569.88	1877.4	2047.41	2406.29	2197.16	1017.47	1069.67	1437.54	931.654	938.51	1447.35	1.12628e-06	0.492352	s
3.05_432.0600n	453.035	3.05	neg	M+Na-2H, M+Cl, M-H	C21H17ClO8	-2.84014	64.0646	100 - 23.2 - 36.2 - 7.98 - 1.41 - 0.186	HMDB0033338	Mollicellin F	Organic compounds	Organoheterocyclic compounds	Benzopyrans	109.126	118.011	117.145	103.745	100.051	101.168	246.469	156.717	90.182	181.101	138.915	72.7629	143.124	181.152	167.142	100.816	130.183	166.374	189.668	217.552	323.654	134.644	183.558	305.714	0.00594956	0.492113	s
2.12_446.1690m/z	446.169	2.1185	neg	M+Cl	C23H29N3O2S	3.64926	76.4682	100 - 27.2 - 8.48 - 1.6 - 0.224	HMDB0015196	Acetophenazine	Organic compounds	Organoheterocyclic compounds	Benzothiazines	315.485	259.174	234.627	378.324	278.736	263.568	163.375	221.642	174.466	150.978	275.983	230.993	207.13	225.442	244.147	250.128	201.175	331.283	118.233	187.963	129.892	119.6	232.915	135.384	0.000817071	0.491483	s
1.19_243.1346m/z	243.135	1.18703	pos	2M+Na	C7H10O	-4.21626	94.2204	100 - 7.72 - 0.463	HMDB0061891	(E,Z)-2,4-Heptadienal	Organic compounds	Organooxygen compounds	Carbonyl compounds	182.839	125.134	135.821	242.854	167.871	155.298	74.0313	131.218	131.19	66.9613	166.91	150.012	134.361	138.583	130.787	118.451	140.987	206.768	59.1081	68.3488	69.0158	22.9247	48.371	52.7214	7.64904e-05	0.491383	s
2.73_487.2868m/z	487.287	2.72998	neg	2M-H	C16H20O2	2.94761	90.1997	100 - 17.6 - 1.87 - 0.147	HMDB0134717	2-methyl-2-(4-methylpent-3-en-1-yl)-2H-chromen-8-ol	Organic compounds	Organoheterocyclic compounds	Benzopyrans	124.671	89.4789	95.0211	153.78	115.83	79.2021	6.22513	100.704	94.1539	0.691356	86.6687	91.2857	109.833	53.9831	83.2642	101.517	45.8376	64.9594	2.70158	6.90579	6.67838	1.33742	3.2633	0.0304574	5.85339e-05	0.489725	s
2.00_577.2631m/z	577.263	2.00492	neg	2M-H	C16H20ClN3	2.15854	68.6698	100 - 18.6 - 33.6 - 6.05 - 0.528	HMDB0015690	Chloropyramine	Organic compounds	Benzenoids	Benzene and substituted derivatives	394.312	133.637	100.246	367.585	122.408	135.34	19.7898	98.3132	55.0526	8.00645	115.144	57.0582	105.445	73.4539	175.493	108.644	98.5967	231.087	42.3169	48.2235	38.0049	35.8805	49.1569	44.8529	0.00446914	0.487955	s
2.30_434.2743n	399.26	2.29638	pos	M+H-2H2O, M+Na	C22H42O6S	9.51903	93.6066	100 - 25.3 - 8.82 - 1.66 - 0.264	HMDB0037511	Butyl oleate sulfate	Organic compounds	Organic acids and derivatives	Organic sulfuric acids and derivatives	1570.19	1358.73	1941.79	2473.83	2305.43	2977.06	1386.19	1952.61	1532.67	1693.68	2746.4	2084.96	2334.54	1813.27	2823.29	2507.73	2035.86	3901.49	1293.31	1802.35	1233.4	1484.43	1891.65	1369.56	0.0265351	0.487025	s
2.50_439.2540m/z	439.254	2.49567	neg	2M+FA-H	C8H15N5O	1.25664	76.0605	100 - 10.7 - 0.727	HMDB0062766	4-ethylamino-6-isopropylamino-1,3,5-triazin-2-ol	Organic compounds	Organoheterocyclic compounds	Triazines	264.632	199.362	205.803	296.3	237.216	196.819	114.577	151.369	146.718	63.5299	173.734	138.016	145.353	157.459	207.006	205.78	137.801	235.261	103.548	120.379	92.5448	97.8262	100.409	103.337	1.22239e-05	0.486696	s
6.98_701.5638m/z	701.564	6.97672	pos	M+K	C46H78O2	0.766633	81.5051	100 - 50.7 - 13 - 2.25 - 0.295	HMDB0036287	Campesteryl linoleate	Organic compounds	Lipids and lipid-like molecules	Steroids and steroid derivatives	131.84	364.584	393.816	49.5964	317.764	306.962	779.153	412.133	758.435	797.592	340.313	851.954	612.212	670.175	167.04	647.316	642.968	131.867	716.602	435.506	499.415	810.473	344.296	419.977	0.0230083	0.481325	s
0.55_282.0352m/z	282.035	0.553417	neg	M+Na-2H	C10H16NO3PS	6.59605	88.4793	100 - 12.3 - 5.83 - 0.618	HMDB0001504	Aminoparathion	Organic compounds	Organic acids and derivatives	Organic thiophosphoric acids and derivatives	124.688	109.815	80.1564	129.678	144.871	143.057	392.498	151.808	292.835	243.594	323.334	350.979	135.892	79.034	147.455	175.133	222.804	112.434	291.868	324.162	321.084	380.466	325.056	249.404	4.11264e-06	0.481324	s
2.39_996.5071m/z	996.507	2.38855	pos	M+H-2H2O	C50H81NO21	-8.86487	73.0591	100 - 56.2 - 19.8 - 5.21 - 1.13 - 0.208	HMDB0032002	Dehydrotomatine	Organic compounds	Lipids and lipid-like molecules	Steroids and steroid derivatives	371.155	434.833	451.228	337.885	467.727	412.866	325.591	356.835	402.534	407.841	210.695	426.543	428.686	467.638	235.618	525.582	411.097	306.23	310.557	299.363	285.697	209.415	150.696	270.649	0.00936637	0.480756	s
3.21_329.2318m/z	329.232	3.21358	neg	M-H	C18H34O5	-4.64768	92.5773	100 - 20 - 2.93 - 0.32	HMDB0038555	(9S,10E,12S,13S)-9,12,13-Trihydroxy-10-octadecenoic acid	Organic compounds	Lipids and lipid-like molecules	Fatty Acyls	159.255	141.86	166.755	184.206	173.901	211.541	187.861	169.523	168.583	198.12	201.694	163.31	261.772	280.113	246.16	297.102	321.958	313.091	193.806	234.793	218.355	256.09	270.674	271.553	4.5717e-07	0.476743	s
1.14_231.1339m/z	231.134	1.14417	neg	M+Na-2H	C9H18N6	-0.0716717	91.8511	100 - 12.1 - 0.679	HMDB0014631	Altretamine	Organic compounds	Organic nitrogen compounds	Organonitrogen compounds	593.664	314.572	340.946	702.905	387.77	457.455	189.885	300.349	256.871	236.027	417.202	404.4	347.107	358.169	538.855	500.232	457.454	718.572	178.019	216.959	173.385	255.372	303.88	241.933	0.00184321	0.474319	s
2.28_388.2158m/z	388.216	2.2821	pos	M+H+Na	C40H64O13	0.57881	86.4095	100 - 44.5 - 12.3 - 2.55 - 0.432	HMDB0040745	Polypodoside C	Organic compounds	Lipids and lipid-like molecules	Steroids and steroid derivatives	88.7144	93.2419	54.7847	132.078	69.1313	40.2572	32.5124	55.156	52.6608	20.1963	28.0706	49.0208	55.0208	7.19715	13.2256	14.5366	18.7201	36.1878	5.64935	3.72087	1.94543	1.82386	1.16865	0.352915	1.57626e-05	0.469605	s
4.69_509.3503n	510.358	4.68655	pos	M+H, M+Na	C25H52NO7P	4.29857	82.4503	100 - 28.3 - 5.29 - 0.742	HMDB0011481	LysoPE(0:0/20:0)	Organic compounds	Lipids and lipid-like molecules	Glycerophospholipids	35.6339	124.082	147.605	34.6404	122.353	158.114	286.047	142.122	129.887	332.477	149.179	175.401	138.557	151.215	88.1245	153.876	194.956	101.571	217.197	234.035	307.643	272.849	159.384	314.496	0.00245645	0.469556	s
1.31_229.1552m/z	229.155	1.3149	pos	M+ACN+H	C9H17NO3	2.71343	93.6748	100 - 10.4 - 1.1	HMDB0013010	N-Heptanoylglycine	Organic compounds	Organic acids and derivatives	Carboxylic acids and derivatives	585.674	553.758	624.57	854.97	845.515	921.731	606.122	657.442	604.554	637.711	873.445	806.023	695.608	733.642	707.993	796.405	791.903	927.035	528.626	663.331	470.542	500.686	641.592	464.097	0.0144124	0.465486	s
6.00_656.5315m/z	656.532	6.00237	pos	M+H-2H2O	C38H78NO7P	-9.01243	81.8745	100 - 42.6 - 10.3 - 1.81 - 0.254	HMDB0013341	PC(o-14:0/16:0)				82.3138	91.2569	88.1616	85.6374	112.859	97.5466	160.42	161.912	108.13	138.691	141.938	128.14	102.789	144.389	154.249	138.308	121.366	102.403	174.962	230.545	157.728	214.754	178.457	158.785	5.54868e-06	0.464796	s
2.34_453.1801m/z	453.18	2.33923	neg	M-H2O-H	C25H30NO8+	1.7204	67.6419	100 - 28.1 - 5.43 - 0.788	HMDB0061139	Doxepin N-oxide glucuronide	Organic compounds	Organoheterocyclic compounds	Benzoxepines	256.482	177.771	158.972	270.269	199.431	177.745	48.1492	147.104	103.428	42.7386	133.341	126.955	145.565	114.514	209.089	144.051	90.8931	237.575	50.1689	118.273	94.4551	45.9747	95.3293	47.6937	0.000288486	0.46183	s
1.19_259.1287m/z	259.129	1.18702	neg	M+FA-H	C10H18N2O3	-5.65949	89.3208	100 - 11.9 - 1.26	HMDB0029135	Valyl-Proline	Organic compounds	Organic acids and derivatives	Carboxylic acids and derivatives	367.758	192.558	160.35	407.044	221.773	208.858	95.0191	177.439	162.547	123.239	233.91	241.492	182.101	201.165	216.009	247.275	302.584	302.037	82.4611	123.126	79.5705	118.084	149.158	115.719	0.00302427	0.461824	s
2.26_437.2540m/z	437.254	2.26067	pos	M+H+Na	C46H74O14	4.22556	60.0774	100 - 51.1 - 15.7 - 3.56 - 0.657 - 0.103	HMDB0035981	Hebevinoside V	Organic compounds	Lipids and lipid-like molecules	Steroids and steroid derivatives	226.44	190.124	221.923	267.031	238.584	240.933	98.711	225.852	262.263	115.544	237.385	334.206	229.446	186.31	211.16	172.104	168.934	299.468	107.663	149.046	92.985	125.369	152.25	71.2134	0.00770275	0.461709	s
2.44_993.4624m/z	993.462	2.43853	neg	M-2H	C92H148O46	7.6581	34.8908	97.1 - 100 - 60.1 - 26.6 - 9.51 - 2.9 - 0.776 - 0.186	HMDB0033570	QS 21	Organic compounds	Lipids and lipid-like molecules	Prenol lipids	121.301	116.796	129.253	135.673	117.498	132.049	32.4123	107.758	82.453	6.98647	113.943	105.97	75.362	41.2858	130.798	115.115	35.327	99.6888	35.0077	37.8163	28.4833	14.5949	45.3485	15.4411	0.000333124	0.459828	s
2.58_1029.5222m/z	1029.52	2.58068	neg	M-H2O-H	C51H84O22	-5.14151	82.3014	100 - 57 - 20.4 - 5.49 - 1.21 - 0.228	HMDB0034062	Protodioscin	Organic compounds	Lipids and lipid-like molecules	Steroids and steroid derivatives	147.562	155.047	91.2106	182.617	117.841	63.0462	37.0164	163.187	134.41	17.4062	124.651	130.122	118.839	38.4649	86.7502	76.9349	46.6276	58.9803	16.5352	27.8003	24.1632	69.5079	41.8949	50.2933	0.00834391	0.458819	s
4.21_519.3331n	520.34	4.20938	pos	M+H, M+Na	C26H50NO7P	1.0951	94.2179	100 - 29.3 - 5.59 - 0.798	HMDB0062711	2-linoleoyl-sn-glycero-3-phosphocholine	Organic compounds	Lipids and lipid-like molecules	Glycerophospholipids	72.6232	110.507	180.271	64.9444	120.119	176.965	351.012	278.234	205.442	317.367	292.498	292.808	128.106	161.215	144.652	140.721	128.591	188.774	285.331	234.716	364.402	281.471	253.031	361.968	6.65899e-07	0.458471	s
0.82_328.1624n	363.132	0.817	neg	M+Cl, 2M+FA-H, M+Na-2H	C19H24N2OS	4.49215	90.5679	100 - 22.4 - 7.12 - 1.18 - 0.143	HMDB0015474	Methotrimeprazine	Organic compounds	Organoheterocyclic compounds	Benzothiazines	268.679	134.892	75.9321	337.88	178.366	61.0329	40.7775	54.6444	41.5504	37.3027	121.494	46.8378	53.0311	72.6578	138.448	84.1557	122.941	160.891	20.1111	54.9037	67.7419	3.50389	24.7951	80.2439	0.00590461	0.45789	s
2.52_810.4666m/z	810.467	2.5171	neg	M-H	C43H65N5O10	0.95245	76.2307	100 - 49.5 - 14 - 2.91 - 0.484	HMDB0015111	Telithromycin	Organic compounds	Organic oxygen compounds	Organooxygen compounds	205.719	215.394	217.178	196.863	234.149	210.578	160.124	198.057	175.728	74.0016	212.352	167.614	152.364	162.726	208.338	237.686	162.085	211.645	125.12	131.864	121.583	100.044	70.4539	94.8868	0.000123263	0.455292	s
2.52_506.2943m/z	506.294	2.52427	pos	M+NH4	C24H40O10	-3.40145	92.6606	100 - 26.8 - 5.51 - 0.834 - 0.107	HMDB0038732	alpha-Ionol O-[arabinosyl-(1->6)-glucoside]				145.238	102.436	118.102	182.607	118.088	157.643	28.6398	89.7206	67.2504	9.92828	119.072	61.9561	118.07	58.6904	70.9309	121.554	63.9522	146.25	31.0978	67.3503	18.0188	13.3943	36.2478	8.7674	9.98417e-05	0.454286	s
0.64_292.0710m/z	292.071	0.639133	neg	M+Cl	C10H15N3O5	1.50253	96.6299	100 - 12.3 - 1.72 - 0.15	HMDB0039229	Pyro-L-glutaminyl-L-glutamine	Organic compounds	Organic acids and derivatives	Carboxylic acids and derivatives	25.9057	36.5603	36.2677	21.1426	33.2112	50.5822	290.684	159.273	238.704	305.526	212.844	315.056	72.7349	76.1859	34.5673	113.879	135.481	14.2431	238.271	170.49	180.226	334.956	270.792	204.696	1.30675e-07	0.452771	s
2.09_425.1988m/z	425.199	2.08993	neg	M+FA-H	C21H29FO5	1.90199	86.397	100 - 23.2 - 3.6 - 0.42	HMDB0014825	Fludrocortisone	Organic compounds	Lipids and lipid-like molecules	Steroids and steroid derivatives	213.491	131.573	173.149	217.764	140.647	202.05	27.1232	105.807	89.4675	17.0043	123.421	85.6216	154.507	46.7204	228.632	158.689	83.4086	255.835	26.5146	59.0326	12.4191	22.7433	49.9109	31.5762	0.000167266	0.451947	s
3.88_313.2366m/z	313.237	3.88218	neg	M-H2O-H	C18H36O5	-5.52994	81.8722	100 - 20.1 - 2.94 - 0.32	HMDB0034295	Floionolic acid	Organic compounds	Lipids and lipid-like molecules	Fatty Acyls	26.8643	22.4197	27.3378	30.7426	43.9079	47.9156	55.9138	34.256	41.8991	64.5079	35.4682	37.2917	71.2894	85.1612	71.9543	89.7384	99.9385	79.3696	72.7231	75.8837	74.9718	98.804	110.698	113.695	4.16175e-07	0.450639	s
2.50_319.2117n	340.186	2.50282	neg	M+Na-2H, M+FA-H	C19H29NO3	-9.47709	87.0244	100 - 21.4 - 2.79 - 0.271	HMDB0061098	alpha-dihydrotetrabenazine	Organic compounds	Organoheterocyclic compounds	Tetrahydroisoquinolines	338.092	254.073	255.274	423.855	301.087	285.131	136.318	225.514	213.212	116.994	255.401	216.605	231.113	215.577	295.671	317.943	268.456	392.418	134.241	176.74	144.99	128.953	179.832	168.881	0.000169621	0.450546	s
4.11_311.2210m/z	311.221	4.11005	neg	2M-H	C9H16O2	-5.63985	99.0014	100 - 9.99 - 0.858	HMDB0034716	4-Oxononanal	Organic compounds	Organic oxygen compounds	Organooxygen compounds	65.7802	61.8766	104.08	72.2685	80.6516	113.421	133.966	150.653	111.511	135.175	183.092	96.0923	113.021	130.172	131.251	146.525	117.085	159.663	105.253	168.381	179.435	156.009	206.387	190.731	0.000304983	0.450306	s
1.57_723.2944m/z	723.294	1.57063	pos	2M+H	C18H20FN3O4	-0.666583	94.4047	100 - 20.9 - 2.91 - 0.303	HMDB0015296	Ofloxacin	Organic compounds	Organoheterocyclic compounds	Quinolines and derivatives	244.551	168.627	208.793	266.799	230.218	184.358	113.74	186.206	105.515	101.911	142.602	99.0321	140.058	114.076	271.91	129.964	80.102	243.562	79.446	115.733	122.612	42.2232	126.644	91.855	0.0021621	0.447738	s
2.22_545.2708m/z	545.271	2.2178	neg	M+Na-2H	C27H44N2O6S	7.78215	86.2845	100 - 31.5 - 10.5 - 2.24 - 0.381	HMDB0127524	11-[(2R,3S)-3-[2-amino-3-methyl-4-(2-methyl-1,3-thiazol-4-yl)but-3-en-1-yl]-2-methyloxiran-2-yl]-3,7-dihydroxy-4,4,6,8-tetramethyl-5-oxoundecanoic acid	Organic compounds	Lipids and lipid-like molecules	Prenol lipids	435.959	277.653	245.109	457.409	245.144	250.411	86.8482	182.173	150.388	70.4458	223.529	171.662	250.147	249.717	307.866	285.146	206.436	319.93	123.669	186.695	129.191	125.682	213.723	107.781	0.0002142	0.445105	s
7.34_749.5189n	748.512	7.33953	neg	M-H, M+Na-2H	C39H76NO10P	-2.31601	90.8603	100 - 43.8 - 11.4 - 2.2 - 0.343	HMDB0112372	PS(18:0/15:0)	Organic compounds	Lipids and lipid-like molecules	Glycerophospholipids	332.302	895.629	800.782	233.313	688.022	630.891	623.743	319.55	679.664	481.221	152.242	497.222	3103.05	2285.99	368.409	3230.45	2016.16	264.71	750.31	443.291	460.306	590.132	397.619	312.924	0.00376502	0.443842	s
4.57_299.2576m/z	299.258	4.56508	neg	M+FA-H	C17H34O	-6.23191	90.7018	100 - 18.8 - 1.88 - 0.132	HMDB0031040	2-Heptadecanone	Organic compounds	Organic oxygen compounds	Organooxygen compounds	178.492	129.703	274.878	173.346	281.169	378.843	729.873	382.14	342.956	638.725	584.326	238.712	326.748	445.612	252.358	458.363	495.986	375.851	456.1	522.048	425.201	364.549	319.718	504.94	0.0130857	0.44383	s
2.37_1031.3852m/z	1031.39	2.3671	neg	3M-H	C12H24O11	-2.97262	88.5273	100 - 13.7 - 3.13 - 0.342	HMDB0040937	Lactitol	Organic compounds	Lipids and lipid-like molecules	Fatty Acyls	27.8266	37.8064	83.2076	29.3046	38.0552	82.8703	85.1602	65.4918	17.0683	73.1026	52.7913	5.93052	76.745	78.0004	125.487	135.754	100.195	161.41	93.9268	137.194	98.4881	113.472	148.667	87.1624	0.000485201	0.442852	s
0.94_279.1334m/z	279.133	0.944867	neg	M-H	C14H20N2O4	-5.97185	88.884	100 - 16.3 - 2.06 - 0.192	HMDB0029118	Tyrosyl-Valine	Organic compounds	Organic acids and derivatives	Carboxylic acids and derivatives	322.692	39.9985	32.9076	353.49	59.8596	30.7234	5.41206	25.9814	51.8413	2.3818	46.8755	79.9336	29.8615	94.8715	68.4927	46.9151	111.836	101.816	0	6.6501	2.81917	6.24818	3.70844	5.49309	0.0453016	0.442523	s
4.79_436.3551m/z	436.355	4.79298	pos	M+ACN+H	C28H42O	-5.90118	82.4307	100 - 30.8 - 4.79 - 0.501	HMDB0041050	(3beta,22E,24R)-Ergosta-4,6,8(14),22-tetraen-3-ol	Organic compounds	Lipids and lipid-like molecules	Steroids and steroid derivatives	43.3592	118.83	135.209	52.0748	183.497	151.419	187.394	124.465	141.818	197.799	149.547	250.059	194.834	249.877	124.579	279.562	259.367	155.969	206.145	200.856	170.149	236.208	196.197	201.281	0.0113285	0.439719	s
6.64_483.3764m/z	483.376	6.6424	pos	M+2Na	C60H104O6	-9.64743	79.9866	100 - 66.3 - 22.9 - 5.45 - 1 - 0.152	HMDB0054356	TG(22:2(13Z,16Z)/15:0/20:4(8Z,11Z,14Z,17Z))	Organic compounds	Lipids and lipid-like molecules	Glycerolipids	192.897	223.439	222.815	211.266	283.303	302.983	396.591	381.742	247.721	421.329	426.402	302.021	204.898	352.03	315.853	293.25	368.614	259.452	352.287	369.491	319.157	449.285	368.014	424.348	0.00139208	0.438725	s
2.59_683.2903m/z	683.29	2.58782	neg	2M-H	C20H22O5	6.05328	61.8672	100 - 22.1 - 3.35 - 0.381	HMDB0135886	3-[3,4-dihydroxy-5-(3-methylbut-2-en-1-yl)phenyl]-1-(2,4-dihydroxyphenyl)propan-1-one	Organic compounds	Phenylpropanoids and polyketides	Linear 1,3-diarylpropanoids	159.48	478.279	275.98	179.171	462.867	200.488	96.105	233.175	159.349	69.7506	220.408	170.888	355.238	168.246	228.89	375.715	187.38	275.599	132.921	125.283	117.893	102.834	103.419	108.4	0.00738616	0.436527	s
0.80_439.0838m/z	439.084	0.802717	neg	M+Na-2H	C21H22O7S	1.14387	79.5079	100 - 24 - 8.72 - 1.6 - 0.261	HMDB0125878	{[1-(4-hydroxyphenyl)-3-(5-methoxy-2,2-dimethyl-2H-chromen-6-yl)prop-2-en-1-yl]oxy}sulfonic acid	Organic compounds	Organoheterocyclic compounds	Benzopyrans	312.082	444.19	508.466	297.537	562.085	652.629	694.591	495.43	538.763	886.105	750.771	688.007	602.249	781.212	497.686	859.842	1055.5	633.086	531.81	561.19	533.028	656.673	698.102	700.477	0.0257795	0.436292	s
1.98_312.1668n	347.134	1.97635	neg	M-H2O-H, M+Cl	C19H24N2S	2.55058	83.0236	100 - 22.4 - 6.9 - 1.14 - 0.129	HMDB0014536	Ethopropazine	Organic compounds	Organoheterocyclic compounds	Benzothiazines	272.464	111.646	119.392	278.578	149.593	171.899	17.0507	121.59	92.6887	37.072	168.172	106.993	118.478	44.4665	176.146	169.401	74.7393	224.455	43.731	52.2991	58.7311	61.6419	75.8781	64.9993	0.00761912	0.434004	s
2.46_390.1681m/z	390.168	2.45995	neg	M-H	C24H25NO4	-7.61593	76.0297	100 - 26.8 - 4.26 - 0.502	HMDB0015279	Flavoxate	Organic compounds	Phenylpropanoids and polyketides	Flavonoids	375.426	185.211	126.848	465.408	238.133	158.915	119.431	160.418	210.651	98.1285	195.915	217.65	167.559	263.111	208.277	208.701	289.854	263.194	106.037	147.759	96.2428	105.411	159.112	85.3435	0.0178167	0.433517	s
2.42_623.3734m/z	623.373	2.4171	neg	2M+FA-H	C14H27NO5	-4.58265	86.6008	100 - 16 - 2.23 - 0.22	HMDB0061633	3-hydroxyhexanoyl carnitine	Organic compounds	Lipids and lipid-like molecules	Fatty Acyls	379.275	409.772	446.437	442.176	431.538	468.583	324.757	456.814	375.714	188.595	509.105	323.081	315.281	384.316	502.686	513.771	423.721	621.985	256.792	314.202	239.955	232.296	235.008	282.167	0.00196661	0.43229	s
5.08_297.2419m/z	297.242	5.07725	neg	M-H2O-H	C18H36O4	-5.06826	83.2774	100 - 20 - 2.72 - 0.278	HMDB0072878	MG(i-15:0/0:0/0:0)	Organic compounds	Lipids and lipid-like molecules	Glycerolipids	16.5815	18.3869	17.5504	10.1895	27.387	16.6472	75.4759	56.8771	88.8834	78.1303	43.3468	82.2584	48.4265	60.5287	30.5368	60.4919	63.9072	24.3694	120.525	99.6417	68.2657	121.763	98.7434	97.7022	1.31688e-07	0.431851	s
0.82_230.1302n	272.167	0.82415	pos	M+Na, 2M+H, M+ACN+H	C15H18O2	-2.01577	78.1528	100 - 16.5 - 1.69 - 0.129	HMDB0033235	8,12-Epoxy-4(15),7,11-eudesmatrien-1-one	Organic compounds	Lipids and lipid-like molecules	Prenol lipids	276.905	148.781	92.1043	296.714	111.98	65.6373	50.3349	86.6037	65.5867	19.2986	75.0641	41.5111	61.3727	75.9473	99.0916	12.1963	45.1207	87.8252	31.4195	84.7371	61.1909	44.6999	43.9345	86.3637	0.0053208	0.430379	s
2.70_728.4890m/z	728.489	2.7014	neg	M-H2O-H	C39H74NO10P	2.39057	79.8783	100 - 43.8 - 11.4 - 2.2 - 0.343	HMDB0112409	PS(18:1(9Z)/15:0)	Organic compounds	Lipids and lipid-like molecules	Glycerophospholipids	58.5937	105.947	138.831	78.5434	153.792	194.946	168.69	151.329	134.457	199.075	161.658	127.136	186.004	223.837	159.001	178.967	244.721	177.263	188.28	203.431	205.857	215.506	205.269	162.873	0.00281833	0.430216	s
2.76_337.1213m/z	337.121	2.75855	neg	M+Cl	C18H22O4	0.283616	88.7796	100 - 19.9 - 2.69 - 0.274	HMDB0126616	4-(1-hydroxy-3-phenylpropyl)-5-methoxy-2,6-dimethylbenzene-1,3-diol	Organic compounds	Phenylpropanoids and polyketides	Linear 1,3-diarylpropanoids	78.7803	88.74	69.5574	110.992	100.182	70.3254	43.4155	72.7392	73.3968	39.6554	84.5918	65.3142	66.8184	46.0465	72.3988	65.1456	43.7097	58.8272	23.3438	27.1917	26.9632	29.4962	15.8683	10.9528	1.90272e-06	0.427339	s
3.61_353.0467m/z	353.047	3.61217	neg	M+Na-2H	C13H16O10	-6.89794	97.0001	100 - 14.6 - 3.05 - 0.341	HMDB0133117	2,3,5-trihydroxy-6-(hydroxymethyl)oxan-4-yl 3,4,5-trihydroxybenzoate	Organic compounds	Benzenoids	Benzene and substituted derivatives	413.092	692.226	657.029	504.437	752.762	732.162	552.064	641.43	622.731	517.256	627.739	657.845	677.819	806.634	676.301	731.579	856.339	777.237	450.745	435.079	319.734	439.936	511.218	359.786	3.06377e-05	0.425424	s
2.64_1379.6974m/z	1379.7	2.64497	neg	2M-H	C30H60O13P2	2.0265	69.3402	100 - 33.6 - 8.15 - 1.47 - 0.223	HMDB0116536	PGP(i-12:0/i-12:0)	Organic compounds	Lipids and lipid-like molecules	Glycerophospholipids	357.042	214.174	332.113	364.229	215.242	270.215	146.657	348.472	229.561	93.9157	325.726	138.207	302.001	194.699	382.493	252.296	203.631	436.41	117.442	197.728	91.6446	92.2644	232.181	81.0266	0.0122378	0.425368	s
0.50_650.3764n	649.326	0.496983	neg	M-H2O-H, M-H	C39H54O8	-8.36685	79.3792	100 - 43.1 - 10.7 - 1.95 - 0.284	HMDB0040682	23-trans-p-Coumaroyloxytormentic acid	Organic compounds	Lipids and lipid-like molecules	Prenol lipids	140.245	133.337	37.1533	162.534	90.4262	41.7565	71.631	41.8316	38.9194	60.2618	42.8594	34.3407	35.3502	49.2681	38.7566	26.8591	49.2387	24.3062	27.7858	23.0945	30.5918	34.1908	20.6312	23.9888	0.000915923	0.425089	s
2.31_876.9216m/z	876.922	2.31067	pos	M+ACN+H	C20H28I3N3O9	-9.82821	78.2445	100 - 23.4 - 4.47 - 0.618	HMDB0041909	Iopentol	Organic compounds	Benzenoids	Benzene and substituted derivatives	39.059	202.09	326.271	30.73	265.209	451.597	391.307	289.227	423.255	432.58	415.894	553.839	390.169	513.813	259.733	419.529	530.687	313.183	401.951	358.706	371.292	390.603	330.6	350.038	0.0172555	0.423972	s
1.01_513.2659m/z	513.266	1.00915	neg	M+FA-H	C25H40O8	-9.94469	94.0028	100 - 27.8 - 5.36 - 0.775	HMDB0010359	17-Hydroxyandrostane-3-glucuronide	Organic compounds	Lipids and lipid-like molecules	Steroids and steroid derivatives	802.959	461.575	542.349	830.848	584.4	629.478	386.219	545.719	353.609	462.134	762.291	511.237	447.058	514.664	712.556	673.965	621.611	956.013	322.94	432.937	315.327	431.587	643.126	430.479	0.043921	0.422255	s
0.54_893.9689m/z	893.969	0.539133	neg	3M-H	C20H42O	6.11056	43.0318	100 - 22.2 - 2.54 - 0.202	HMDB0011619	Arachidyl alcohol	Organic compounds	Lipids and lipid-like molecules	Fatty Acyls	143.732	213.892	264.296	139.517	253.163	300.7	366.252	249.91	263.386	346.911	358.293	376.871	255.364	271.729	253.842	296.569	405.133	282.113	284.263	265.998	304.58	433.362	363.97	359.423	0.0131441	0.420837	s
2.04_445.1825m/z	445.182	2.03993	neg	M+Na-2H	C22H32O8	-4.46232	60.5233	100 - 24.5 - 4.51 - 0.615	HMDB0034492	Dihydrovaltrate	Organic compounds	Lipids and lipid-like molecules	Prenol lipids	523.701	324.135	305.228	569.386	348.343	384.281	157.092	292.235	207.367	170.142	371.371	260.894	313.19	285.669	491.775	380.843	331.329	567.061	165.779	260.619	208.113	164.896	319.796	221.967	0.00276278	0.41364	s
2.37_438.1655m/z	438.165	2.3671	neg	M+Na-2H	C21H27N3O6	1.94359	95.2612	100 - 24.3 - 4.07 - 0.511	HMDB0030274	(E)-Casimiroedine	Organic compounds	Phenylpropanoids and polyketides	Cinnamic acids and derivatives	654.304	425.58	219.743	775.476	485.186	226.501	60.4549	232.387	431.84	52.4219	249.105	448.141	441.503	431.622	502.322	503.691	395.212	488.294	181.424	298.133	265.702	157.47	238.103	247.504	0.011602	0.410804	s
2.33_871.3611m/z	871.361	2.33208	neg	2M+FA-H	C23H27NO6	-5.72799	91.6038	100 - 25.8 - 4.42 - 0.569	HMDB0030401	AK toxin I	Organic compounds	Organic acids and derivatives	Carboxylic acids and derivatives	234.354	232.157	163.801	261.137	236.855	155.669	133.158	156.194	101.156	114.593	166.694	128.191	150.526	187.874	180.58	184.901	180.781	225.972	84.6903	104.276	146.136	88.7622	110.63	127.846	2.58457e-05	0.409219	s
4.44_293.2101m/z	293.21	4.44437	neg	M+Na-2H	C16H32O3	1.08499	96.531	100 - 17.8 - 2.1 - 0.187	HMDB0112192	6-Hydroxyhexadecanoic acid	Organic compounds	Lipids and lipid-like molecules	Fatty Acyls	14.5858	13.8764	9.04744	18.4384	8.79145	9.77987	143.276	144.515	157.916	161.575	166.761	143.759	7.71721	18.891	9.64413	18.8987	15.8504	14.2769	176.735	171.846	130.817	207.363	180.305	133.964	2.008e-14	0.4075	s
5.06_509.3857n	510.393	5.05587	pos	M+H, M+Na	C26H56NO6P	2.38657	86.3657	100 - 29.4 - 5.39 - 0.74	HMDB0062689	1-octadecylglycero-3-phosphocholine	Organic compounds	Lipids and lipid-like molecules	Glycerophospholipids	118.7	308.591	354.661	78.0842	395.185	379.621	75.7292	55.5544	72.2349	30.2059	44.4695	33.6346	303.21	352.586	93.2975	343.237	364.396	171.007	59.096	63.9812	58.8958	48.5278	37.3326	37.7635	0.000101816	0.407345	s
2.86_975.0292m/z	975.029	2.85855	neg	2M-H	C21H12O14	-9.12678	77.8205	100 - 23.4 - 5.49 - 0.857 - 0.123	HMDB0136073	8-(6-carboxy-2,3,4-trihydroxyphenoxy)-3,4,9,10-tetrahydroxy-6-oxo-6H-benzo[c]chromene-1-carboxylic acid	Organic compounds	Phenylpropanoids and polyketides	Tannins	89.8055	153.339	193.366	79.9581	159.794	227.669	3.20481	69.5032	79.9391	6.03219	77.2298	62.2366	160.426	117.366	157.89	186.923	87.008	174.739	15.3252	27.6156	3.76673	14.8623	10.4225	4.55528	4.20622e-06	0.405331	s
2.14_552.2875m/z	552.287	2.13995	pos	M+2H	C54H86O23	3.98178	62.1669	100 - 60.3 - 22.6 - 6.31 - 1.44 - 0.283	HMDB0032892	Lablaboside A	Organic compounds	Lipids and lipid-like molecules	Prenol lipids	121.79	80.4263	85.1941	111.318	28.2495	27.4082	20.4797	67.6496	51.9833	14.741	53.4606	11.1117	32.7128	20.5241	55.166	32.4846	16.652	55.1034	2.40364	11.09	4.40179	2.07144	6.77503	3.8217	0.000984958	0.404834	s
1.82_317.1240m/z	317.124	1.81992	neg	M-H	C15H18N4O4	-4.90945	89.5207	100 - 18 - 2.36 - 0.23	HMDB0028742	Asparaginyl-Tryptophan	Organic compounds	Organic acids and derivatives	Carboxylic acids and derivatives	626.905	318.573	415.059	687.358	410.166	567.038	218.936	415.778	262.546	266.488	585.893	362.967	396.829	255.254	664.214	548.623	383.3	832.901	211.715	299.48	221.192	246.587	426.615	349.256	0.0443093	0.401494	s
3.05_445.1018m/z	445.102	3.05	neg	M+FA-H	C17H20O11	7.52372	84.2351	100 - 19 - 3.97 - 0.526	HMDB0128712	3,4,5-trihydroxy-6-{[6-(3-hydroxyprop-1-en-1-yl)-5-methoxy-2H-1,3-benzodioxol-4-yl]oxy}oxane-2-carboxylic acid	Organic compounds	Organic oxygen compounds	Organooxygen compounds	59.242	65.3377	66.6732	57.5491	64.7062	77.2799	139.446	88.0331	45.7574	120.153	106.162	45.5545	85.7807	98.8701	92.4543	75.8922	105.198	118.066	113.751	120.425	169.309	104.017	120.269	178.355	0.00195445	0.39969	s
2.49_411.2594m/z	411.259	2.48853	neg	M-H2O-H	C27H34N4O	9.16223	87.6806	100 - 31.1 - 4.88 - 0.516	HMDB0041990	Piritramide	Organic compounds	Benzenoids	Benzene and substituted derivatives	745.641	745.926	1003.69	828.149	881.414	1115.26	606.013	715.353	604.27	510.125	915.067	673.799	953.157	1172.14	1166.39	1405.03	1307.92	1596.77	822.088	923.748	711.36	878.12	1073.13	840.766	3.54724e-05	0.398669	s
1.30_68.0258n	203.082	1.3006	neg	2M+FA-H, 3M-H	C4H4O	-5.40983	94.6616	100 - 4.41 - 0.279	HMDB0013785	Furan	Organic compounds	Organoheterocyclic compounds	Heteroaromatic compounds	1106.44	1261.33	1223.79	1084.95	1605.14	1486.98	1152.93	1320.78	1056.06	1712.19	1957.81	1381.24	1497.62	1537.43	1441.05	1779.54	2379.59	2135.74	1173.99	1388.07	1294.75	1366.37	1408.22	1797.66	0.0451329	0.397806	s
2.55_190.0833n	171.065	2.55212	neg	M-H2O-H, 2M+FA-H	C8H14O5	-4.14142	95.5267	100 - 9 - 1.39 - 0.1	HMDB0061681	6-(2-Hydroxyethoxy)-6-oxohexanoic acid	Organic compounds	Lipids and lipid-like molecules	Fatty Acyls	273.491	328.579	332.173	303.501	413.509	422.851	486.895	416.847	432.145	499.778	462.75	503.58	457.969	534.624	350.575	511.053	636.253	424.065	401.827	401.581	443.775	459.193	481.083	474.444	0.00475679	0.390239	s
4.98_406.2724n	429.262	4.978	pos	M+Na, M+K	C24H38O5	1.17141	87.7482	100 - 26.6 - 4.42 - 0.55	HMDB0000502	3-Oxocholic acid	Organic compounds	Lipids and lipid-like molecules	Steroids and steroid derivatives	85.5259	159.695	157.084	109.759	212.057	175.18	199.166	220.66	233.111	226.402	261.663	265.965	170.157	210.792	158.086	194.139	262.712	202.153	288.375	265.392	209.524	312.598	238.937	185.983	0.00155669	0.389745	s
2.31_378.1657m/z	378.166	2.31067	neg	M+Cl	C24H25NO	7.68379	96.7086	100 - 26.6 - 3.62 - 0.334	HMDB0142443	2-{4-[(1E)-1,2-diphenylbut-1-en-1-yl]phenoxy}ethan-1-amine	Organic compounds	Phenylpropanoids and polyketides	Stilbenes	136.416	127.466	109.111	143.22	133.876	146.881	64.2627	115.988	79.0474	63.9793	137.909	93.3424	103.252	65.9269	155.077	109.013	63.969	161.527	44.6292	67.0713	51.8995	43.7563	60.6337	61.9613	0.000612574	0.389731	s
1.28_278.1132m/z	278.113	1.27918	neg	M-H	C13H17N3O4	-4.97557	87.2435	100 - 15.5 - 1.95 - 0.178	HMDB0028990	Phenylalanyl-Asparagine	Organic compounds	Organic acids and derivatives	Carboxylic acids and derivatives	213.229	111.229	120.061	267.054	146.592	136.739	54.4846	122.249	95.0646	72.8449	158.37	108.541	118.617	111.446	158.765	161.66	145.501	218.54	44.8822	62.8052	37.4346	53.5251	91.692	79.5741	0.00118414	0.388607	s
0.55_154.0614m/z	154.061	0.553417	neg	M-H2O-H	C6H11N3O3	-4.50945	92.7594	100 - 7.83 - 0.886	HMDB0004225	2-Oxoarginine	Organic compounds	Organic acids and derivatives	Keto acids and derivatives	75.1961	93.6068	84.9643	88.4929	133.986	135.074	154.743	92.9861	109.898	164.232	166.222	170.372	114.397	96.3155	120.226	172.749	238.912	154.05	128.89	134.933	190.751	196.958	183.688	222.341	0.02408	0.388379	s
1.14_187.1080m/z	187.108	1.14417	neg	M-H	C8H16N2O3	-4.55509	91.7224	100 - 9.68 - 1.04	HMDB0029120	Valyl-Alanine	Organic compounds	Organic acids and derivatives	Carboxylic acids and derivatives	405.145	287.706	283.188	520.767	396.975	417.287	221.875	302.296	248.375	276.217	436.069	396.784	305.74	316.758	383.323	465.202	460.944	597.704	179.785	215.357	150.696	262.796	326.634	240.232	0.00612935	0.380078	s
2.56_439.2888m/z	439.289	2.55925	neg	2M-H	C14H20O2	7.80728	89.4054	100 - 15.4 - 1.52 - 0.113	HMDB0037714	Hexyl phenylacetate	Organic compounds	Benzenoids	Benzene and substituted derivatives	126.474	116.508	70.7214	159.896	133.69	70.5768	45.6638	102.134	68.6948	37.2428	91.0286	39.8912	95.4541	60.0847	77.7532	93.058	63.8027	103.028	27.6097	66.0452	32.7987	34.4835	60.0671	13.7797	0.00082897	0.378824	s
8.44_705.5308n	706.538	8.4418	pos	M+H, M+Na	C38H76NO8P	-0.11123	85.9233	100 - 42.6 - 10.5 - 1.9 - 0.276	HMDB0008988	PE(18:0/15:0)	Organic compounds	Lipids and lipid-like molecules	Glycerophospholipids	636.092	705.31	731.151	164.139	512.379	267.675	1092.19	557.737	894.619	575.8	322.1	675.82	1580.78	1264.49	550.866	1234.38	1292.51	331.346	895.74	608.198	474.732	697.968	392.182	469.698	0.0394848	0.377249	s
0.64_347.0630n	348.07	0.639133	pos	M+H, M+Na	C10H14N5O7P	-0.298424	88.0514	100 - 13.1 - 2.23 - 0.217	HMDB0011617	Adenosine 2'-phosphate	Organic compounds	Organic oxygen compounds	Organooxygen compounds	4.4623	61.9066	44.094	3.80842	77.4398	21.3388	55.4189	70.141	167.881	43.3923	98.3233	180.937	140.379	152.474	226.092	147.443	179.186	69.3475	56.803	126.743	171.654	50.4277	83.256	157.79	0.00525622	0.376015	s
0.64_404.0072m/z	404.007	0.639133	neg	M+Na-2H	C13H13N5O5S2	-8.48663	76.8071	100 - 17.8 - 11.6 - 1.8 - 0.485	HMDB0015427	Ceftizoxime	Organic compounds	Organoheterocyclic compounds	Lactams	7.44073	62.3883	31.2676	4.23054	103.178	33.9154	50.886	88.1787	143.731	57.3755	78.2163	194.405	124.01	184.152	82.7328	175.586	244.817	141.953	59.3762	85.1478	137.977	81.8307	116.577	164.863	0.00390916	0.375162	s
0.62_281.1035n	302.063	0.6177	neg	M-H2O-H, M+Na-2H	C12H15N3O5	8.28074	92.4926	100 - 14.4 - 2 - 0.188	HMDB0040693	N2-(gamma-Glutamyl)-4-carboxyphenylhydrazine	Organic compounds	Benzenoids	Benzene and substituted derivatives	53.7141	95.0159	80.6477	47.3342	119.749	115.854	141.773	112.728	142.705	160.19	159.83	209.348	115.823	122.737	114.928	153.532	219.556	132.397	133.142	150.244	149.336	200.513	199.4	144.231	0.00273244	0.374264	s
0.62_461.9522m/z	461.952	0.62485	neg	M+Cl	C18H13Cl4N3O	3.67503	24.9955	76.9 - 16 - 100 - 20.5 - 49.3 - 9.94 - 11.1 - 2.16 - 1.03 - 0.184	HMDB0014384	Oxiconazole	Organic compounds	Benzenoids	Benzene and substituted derivatives	15.0882	79.2304	62.07	6.43318	79.6905	63.0529	108.984	79.5767	139.571	117.576	120.943	196.368	115.843	167.776	75.7652	122.23	203.695	115.857	116.656	118.292	122.823	125.97	134.98	130.596	0.00119149	0.372045	s
4.90_526.2883m/z	526.288	4.89942	pos	M+Na	C25H46NO7P	-4.16675	81.4063	100 - 28.2 - 5.27 - 0.738	HMDB0011486	LysoPE(0:0/20:3(8Z,11Z,14Z))	Organic compounds	Lipids and lipid-like molecules	Glycerophospholipids	19.0474	55.1025	62.694	9.68589	89.3985	88.7474	145.398	83.0641	107.471	138.903	119.494	143.239	55.5138	97.6616	41.8521	62.7079	137.354	39.8231	140.367	163.442	116.309	170.21	153.725	144.453	6.80206e-05	0.371778	s
0.82_585.2193m/z	585.219	0.817	neg	M+FA-H	C26H36O12	0.835508	93.6391	100 - 29 - 6.52 - 1.08 - 0.151	HMDB0038883	Sambacin				308.804	178.702	129.446	322.579	189.198	167.143	53.0783	83.5731	45.5107	84.4745	157.426	33.6565	99.9377	107.21	243.508	96.6475	160.152	299.568	71.3149	106.72	107.155	46.1329	90.2661	108.539	0.00303449	0.370963	s
0.61_814.3948m/z	814.395	0.610567	neg	M-3H	C109H187N5O55	3.01179	24.7047	80.7 - 100 - 70.6 - 36.3 - 15 - 5.26 - 1.61 - 0.443 - 0.111	HMDB0011953	Ganglioside GQ1c (d18:1/20:0)	Organic compounds	Lipids and lipid-like molecules	Sphingolipids	267.427	195.259	196.89	301.952	235.393	276.863	149.762	153.536	97.1919	130.387	272.231	131.495	141.631	136.059	258.161	220.901	246.106	362.82	89.6754	147.488	129.341	87.8802	184.225	124.259	0.0063469	0.369963	s
2.37_425.2730m/z	425.273	2.36712	pos	M+H-2H2O	C27H40O6	9.37799	78.8641	100 - 29.9 - 5.54 - 0.767	HMDB0038352	Lucidenic acid N	Organic compounds	Lipids and lipid-like molecules	Prenol lipids	107.742	97.1088	86.5709	168.859	129.347	118.405	54.9297	84.6988	72.0215	62.1189	125.415	73.5707	87.3442	71.1559	53.6989	58.0479	76.176	120.383	53.5556	69.7296	59.7891	49.5943	68.8258	52.1669	0.00221626	0.368149	s
4.32_481.2553m/z	481.255	4.32363	neg	2M+FA-H	C9H18N2O4	8.57289	98.4479	100 - 10.8 - 1.35 - 0.104	HMDB0033675	L-Lysopine	Organic compounds	Organic acids and derivatives	Carboxylic acids and derivatives	83.2419	170.03	175.578	71.3593	171.348	229.704	64.3427	37.3676	44.8116	42.1326	29.3828	24.8666	154.782	209.106	103.423	166.799	161.569	110.536	28.7454	20.2126	18.7896	24.2666	19.8299	5.60201	1.79054e-06	0.366343	s
2.47_397.2420m/z	397.242	2.4671	neg	M-H2O-H	C25H36O5	8.68685	89.4562	100 - 27.6 - 4.7 - 0.596	HMDB0039598	Colupox b	Organic compounds	Organoheterocyclic compounds	Benzofurans	1187.46	1180.24	1379.02	1305.94	1247.61	1346.45	1031.34	1255.26	952.142	713.072	1432.39	969.59	1079.48	1114	1413.79	1574.49	1246.58	1801.75	884.903	1016.6	914.384	962.912	1050.07	1098.8	0.00975308	0.363266	s
0.60_832.4354m/z	832.435	0.596283	neg	M+Na-2H	C42H70NO12P	-3.45552	74.2896	100 - 47.1 - 13.3 - 2.78 - 0.472	HMDB0061582	PS(DiMe(9,3)/DiMe(9,3))	Organic compounds	Lipids and lipid-like molecules	Glycerophospholipids	170.361	130.11	107.429	180.209	164.07	178.47	99.322	78.3803	99.6933	84.605	210.193	160.519	95.5783	89.1573	162.727	135.178	148.833	215.826	67.1859	103.592	77.0978	59.6532	89.5922	56.3187	0.0118826	0.362668	s
2.18_660.3133m/z	660.313	2.1828	neg	M-2H	C63H102O29	-7.25494	47.4951	100 - 70.4 - 30.4 - 9.76 - 2.56 - 0.575 - 0.114	HMDB0031166	Acutoside F	Organic compounds	Lipids and lipid-like molecules	Prenol lipids	98.7085	43.5861	42.7892	107.542	57.4018	46.403	17.7478	48.7487	51.9198	22.4317	54.9073	64.3446	36.9894	45.9443	53.2176	42.8066	17.185	68.4621	8.31516	21.6437	1.38349	9.29925	5.37636	9.56748	0.00076397	0.362627	s
0.50_771.4198m/z	771.42	0.496983	neg	M+FA-H	C38H62O13	3.53157	47.4609	100 - 42.3 - 11.4 - 2.3 - 0.38	HMDB0029624	Torvoside D	Organic compounds	Lipids and lipid-like molecules	Steroids and steroid derivatives	99.4169	110.419	74.7105	105.391	84.8067	77.5231	74.647	64.4502	43.0447	80.1458	89.5924	69.8086	44.1715	42.1451	43.0093	25.3264	99.3421	30.5266	44.4111	40.2894	45.7711	55.4499	34.0637	61.5477	0.000696436	0.36224	s
4.90_616.2824m/z	616.282	4.89938	neg	M+FA-H	C26H37N9O6	-4.34586	83.8083	100 - 32.1 - 6.22 - 0.895 - 0.104	HMDB0012986	Kinetensin 4-7	Organic compounds	Organic acids and derivatives	Carboxylic acids and derivatives	23.8713	100.025	95.9512	18.9108	97.5585	87.8349	204.012	143.609	199.92	186.877	146.813	203.194	92.0367	169.952	61.849	85.2318	137.15	63.986	195.87	170.839	205.673	162.501	165.169	175.425	1.12742e-05	0.360637	s
4.16_324.2308n	307.227	4.16008	pos	M+H-H2O, M+H, M+Na, M+H-2H2O	C19H32O4	2.2126	88.9403	100 - 21.1 - 2.93 - 0.306	HMDB0031007	1-Acetoxy-2-hydroxy-16-heptadecyn-4-one	Organic compounds	Lipids and lipid-like molecules	Fatty Acyls	165.813	156.692	275.842	156.498	210.109	280.458	301.728	366.837	242.983	276.499	353.219	259.4	235.572	279.158	221.546	180.612	272.931	248.902	259.425	338.191	393.926	223.879	326.322	358.885	0.00611192	0.359952	s
2.74_673.3828m/z	673.383	2.74427	neg	M+Cl	C32H63O10P	-3.88289	59.2898	100 - 35.7 - 8.25 - 1.43 - 0.202	HMDB0116693	PG(i-14:0/i-12:0)	Organic compounds	Lipids and lipid-like molecules	Glycerophospholipids	140.829	119.981	112.252	194.717	120.82	92.6643	13.1158	111.257	133.378	2.34486	113.109	93.1549	134.528	78.0443	165.77	81.4965	63.1608	146.193	29.3765	51.777	57.9533	30.7863	55.3551	36.0677	0.00616545	0.359217	s
0.84_692.3705m/z	692.37	0.838433	neg	3M-H	C14H17NO2	-0.0705025	86.0536	100 - 15.8 - 1.57 - 0.118	HMDB0038839	1-(m-Methoxycinnamoyl)pyrrolidine				505.177	274.125	320.752	503.74	308.617	345.387	134.52	223.75	133.793	121.551	338.025	166.809	244.165	225.186	493.832	314.591	329.968	612.714	130.319	223.653	163.251	160.014	282.417	192.318	0.00361583	0.357719	s
0.81_137.0473m/z	137.047	0.809867	pos	M+K	C5H10N2	-3.04336	99.764	100 - 6.25 - 0.165	HMDB0037787	xi-4,5-Dihydro-2,4(5)-dimethyl-1H-imidazole	Organic compounds	Organoheterocyclic compounds	Imidolactams	31.2118	53.0414	58.0385	31.911	56.0349	65.2643	99.233	67.8754	79.6051	92.5285	90.1782	94.6583	87.7228	96.0266	73.1073	89.7205	103.357	111.379	86.379	92.1899	81.0463	109.957	120.647	95.8414	1.5077e-05	0.355308	s
4.90_565.2852m/z	565.285	4.89938	neg	2M+FA-H	C16H20O3	8.66368	92.0487	100 - 17.6 - 2.08 - 0.184	HMDB0134736	2-(1-hydroxy-4-methylpent-3-en-1-yl)-2-methyl-2H-chromen-8-ol	Organic compounds	Organoheterocyclic compounds	Benzopyrans	20.7923	79.246	61.9171	14.9899	66.5401	55.2205	150.715	101.998	137.775	133.789	101.79	127.716	65.5426	118.586	53.3339	52.2677	105.736	56.2329	152.881	126.261	140.877	125.925	139.95	124.169	4.00055e-06	0.352722	s
0.80_323.0268m/z	323.027	0.802717	neg	2M-H	C5H6O6	3.81112	95.0976	100 - 5.71 - 1.37	HMDB0060466	D-4-Hydroxy-2-oxoglutarate	Organic compounds	Organic acids and derivatives	Keto acids and derivatives	83.2236	132.038	113.36	84.3201	177.007	122.095	102.388	100.226	159.992	137.133	171.162	217.78	152.457	235.735	165.255	252.362	339.65	218.85	109.922	140.571	186.197	152.738	209.884	244.233	0.00942496	0.352695	s
3.63_386.1733n	409.162	3.62648	pos	M+Na, M+K, M+H	C22H26O6	0.814816	88.7523	100 - 24.3 - 4.06 - 0.509	HMDB0030810	Porson	Organic compounds	Phenylpropanoids and polyketides	Diarylheptanoids	276.308	337.279	347.888	375.124	558.823	465.318	605.169	557.253	533.021	739.338	808.566	695.464	394.218	482.077	498.674	505.221	502.957	628.093	615.629	551.208	482.404	625.622	645.275	503.242	0.000518186	0.352343	s
0.76_388.0120m/z	388.012	0.759867	neg	M+Na-2H	C15H14ClN3O4S	-5.50072	62.5973	100 - 18.4 - 38.9 - 6.93 - 2.36 - 0.346	HMDB0014971	Cefaclor	Organic compounds	Organic acids and derivatives	Carboxylic acids and derivatives	113.703	220.508	208.258	123.674	287.604	297.386	277.147	211.149	274.547	453.316	377.522	389.604	252.711	360.332	234.711	341.966	510.793	343.282	271.055	262.966	245.061	376.617	367.108	333.066	0.0438624	0.352253	s
0.61_556.5964m/z	556.596	0.610567	neg	3M-H	C2H4Br2	-0.383777	20.3092	51.4 - 1.14 - 100 - 2.21 - 48.6 - 1.07	HMDB0060334	1,2-Dibromoethane	Organic compounds	Organohalogen compounds	Organobromides	238.197	133.243	161.067	268.17	154.877	202.238	96.6114	134.62	53.6751	112.609	136.079	77.7659	109.544	98.8602	183.605	134.574	153.299	227.394	42.1727	104.153	97.5433	71.1035	141.939	130.488	0.00304714	0.348193	s
2.59_263.1221m/z	263.122	2.59498	pos	2M+H	C5H9NO3	-6.22903	94.0345	100 - 5.99 - 0.766	HMDB0061880	N-Acetyl-beta-alanine	Organic compounds	Organic acids and derivatives	Carboxylic acids and derivatives	38.7655	46.439	56.5821	71.4323	75.9924	79.483	108.203	67.6277	36.2438	145.405	100.968	62.5974	59.8455	75.0765	68.5497	72.2102	88.4833	103.751	93.2657	120.839	150.552	102.233	107.293	193.774	0.00628481	0.347902	s
0.82_288.1177n	309.092	0.817	neg	M+Na-2H, M+FA-H, 2M+FA-H	C20H16O2	9.40622	88.3732	100 - 21.9 - 2.69 - 0.24	HMDB0040915	2-(4-Methyl-1,3-pentadienyl)anthraquinone	Organic compounds	Benzenoids	Anthracenes	224.908	105.76	108.859	227.671	131.509	118.911	88.7034	78.591	90.8631	120.695	123.969	105.824	60.7656	87.6314	144.528	101.049	164.083	166.9	77.6919	81.3862	66.9871	78.8076	73.8803	97.2183	0.0199888	0.346628	s
1.24_387.2232m/z	387.223	1.24347	neg	2M-H	C8H18O5	-0.851988	93.81	100 - 9.05 - 1.39 - 0.101	HMDB0094708	Tetraethylene glycol	Organic compounds	Organic oxygen compounds	Organooxygen compounds	2970.58	1171.39	1157.76	3620.9	1339.69	1331.83	232.759	778.871	432.943	299.671	948.012	534.4	1871.64	1392.35	3037.56	2196.37	1726.63	3775.9	767.205	1206.61	759.169	918.21	1441.15	989.298	0.00133503	0.345883	s
2.08_259.1285m/z	259.129	2.07565	neg	M+FA-H	C10H18N2O3	-6.57224	89.1105	100 - 11.9 - 1.26	HMDB0029030	Prolyl-Valine	Organic compounds	Organic acids and derivatives	Carboxylic acids and derivatives	87.0964	123.951	101.863	93.1861	138.246	109.418	113.174	114.989	96.4678	110.011	153.243	105.856	100.655	107.383	88.4614	132.334	118.042	107.069	59.391	71.3038	33.4998	71.5947	70.4212	21.0634	5.24101e-05	0.345526	s
1.87_494.1873m/z	494.187	1.86922	neg	3M-H	C6H7N5O	-1.31796	98.0812	100 - 8.43 - 0.523	HMDB0006040	N2-Methylguanine	Organic compounds	Organoheterocyclic compounds	Imidazopyrimidines	243.024	131.002	146.569	249.591	169.451	195.867	73.7254	155.571	77.4117	87.4025	212.949	134.203	136.611	109.509	223.038	167.542	122.541	263.378	81.2479	109.911	68.9847	76.99	129.033	105.801	0.0136168	0.345262	s
2.37_310.1393m/z	310.139	2.37423	neg	M+Cl	C20H21N	9.05669	84.1647	100 - 22.2 - 2.36 - 0.158	HMDB0015060	Cyclobenzaprine	Organic compounds	Benzenoids	Dibenzocycloheptenes	69.4086	97.1873	63.0707	88.8144	115.5	83.3479	51.1208	85.0123	72.0879	45.4377	104.127	83.4554	55.0472	56.0202	58.0036	80.3253	57.9407	56.5825	33.2633	41.9084	54.3957	41.2827	37.0953	46.347	0.000827886	0.34416	s
4.30_356.3527m/z	356.353	4.30223	pos	M+ACN+H	C20H42O2	1.20782	96.9322	100 - 22.2 - 2.76 - 0.248	HMDB0040982	1,20-Eicosanediol	Organic compounds	Lipids and lipid-like molecules	Fatty Acyls	61.766	89.9908	122.253	70.2549	131.728	193.884	185.116	122.439	143.678	236.527	146.705	256.94	146.431	263.98	153.986	211.193	344.32	200.595	179.683	135.57	180.535	225.47	144.249	227.494	0.0227912	0.343212	s
2.49_428.2252m/z	428.225	2.48853	neg	3M-H	C7H13NS	4.24786	91.8548	100 - 8.89 - 4.87 - 0.373	HMDB0038435	1-Isothiocyanato-4-methylpentane	Organic compounds	Organosulfur compounds	Isothiocyanates	681.68	774.356	784.493	838.175	840.985	879.384	657.411	683.711	536.871	442.268	802.38	522.86	608.62	742.567	883.037	877.318	739.361	1030.55	571.212	656.71	670.684	543.78	583.456	608.283	0.00217983	0.343148	s
0.84_374.2076n	375.215	0.838433	pos	M+H, M+K, M+Na	C22H30O5	-4.47469	90.408	100 - 24.3 - 3.86 - 0.459	HMDB0040525	11,12-Dimethylrosmanol	Organic compounds	Lipids and lipid-like molecules	Prenol lipids	751.552	582.609	578.252	990.806	768.97	852.959	402.445	514.091	404.901	360.74	695.971	432.366	705.181	634.455	1226.21	672.944	701.724	1131.31	361.524	616.514	380.733	444.636	608.878	455.912	0.0016601	0.343007	s
4.89_406.2725n	429.262	4.88513	pos	M+Na, M+K	C24H38O5	1.40415	91.8093	100 - 26.6 - 4.42 - 0.55	HMDB0000400	3,7-Dihydroxy-12-oxocholanoic acid	Organic compounds	Lipids and lipid-like molecules	Steroids and steroid derivatives	148.651	273.316	292.803	208.723	433.456	351.479	284.323	294.613	329.702	324.495	397.953	433.394	379.144	474.287	400.971	484.207	537.172	468.872	395.145	362.485	254.143	452.332	348.927	280.098	0.00618271	0.34296	s
1.30_292.1288m/z	292.129	1.3006	neg	M-H	C14H19N3O4	-5.12223	84.0863	100 - 16.6 - 2.12 - 0.199	HMDB0028804	Glutaminylphenylalanine	Organic compounds	Organic acids and derivatives	Carboxylic acids and derivatives	126.013	39.9507	34.8261	156.885	45.7981	42.7771	2.24037	29.3824	29.9329	2.81827	38.1765	36.9569	26.113	12.4257	65.6039	35.9687	45.1628	81.0526	1.35941	6.37003	4.57938	3.88231	7.05607	2.88938	0.00503956	0.342837	s
2.21_446.2610m/z	446.261	2.21067	pos	M+ACN+H	C22H32N2O5	-9.80405	85.5288	100 - 25.1 - 4.04 - 0.489	HMDB0014905	Benzquinamide	Organic compounds	Organoheterocyclic compounds	Tetrahydroisoquinolines	1765.34	1414.76	1731.77	2537.24	2102.78	2439.09	659.486	1476.54	1198.52	735.766	1843.9	1396.02	2341.14	1610.06	2850.52	2371.52	1738.51	3686.01	1104.52	1540.56	1176.42	1218.59	1615.7	1259.38	0.00124417	0.340851	s
4.93_452.3931m/z	452.393	4.928	pos	2M+NH4	C10H23N3O2	2.82035	97.8611	100 - 12.3 - 1.1	HMDB0060066	Spermic acid 1	Organic compounds	Organic acids and derivatives	Carboxylic acids and derivatives	63.8596	57.2787	131.942	75.8574	75.2458	150.349	100.421	107.446	118.247	120.408	94.3957	139.296	208.054	144.043	166.668	253.159	149.971	152.938	121.858	143.526	188.38	109.548	130.822	123.63	0.00144609	0.340841	s
1.33_419.2136m/z	419.214	1.32918	pos	M+Na	C18H37O7P	-8.44134	85.0783	100 - 20.2 - 3.37 - 0.406	HMDB0062324	1-pentadecanoyl-glycero-3-phosphate	Organic compounds	Lipids and lipid-like molecules	Glycerophospholipids	165.326	77.682	75.7406	210.662	81.0427	70.4381	37.8906	76.2094	43.1556	25.3249	74.0168	46.0509	70.4051	54.178	87.5077	91.9658	64.7689	145.755	11.2282	48.1668	45.0787	5.2141	35.9955	46.8707	0.00479382	0.339924	s
5.08_397.2247m/z	397.225	5.07725	neg	M+FA-H	C20H32O5	4.20913	79.3985	100 - 22.2 - 3.37 - 0.385	HMDB0062798	5-hydroperoxy-15-HETE	Organic compounds	Lipids and lipid-like molecules	Fatty Acyls	96.8974	114.661	159.339	89.5604	118.363	176.163	214.08	168.607	219.589	208.441	156.798	216.285	210.545	183.737	172.605	217.572	216.789	173.567	167.639	142.582	242.322	179.659	154.608	253.768	0.00375075	0.338835	s
2.24_320.1596m/z	320.16	2.23923	neg	M+FA-H	C10H21N5O4	7.45824	91.7853	100 - 13 - 1.61 - 0.136	HMDB0029055	Threoninyl-Arginine	Organic compounds	Organic acids and derivatives	Carboxylic acids and derivatives	76.0962	62.0003	45.0004	87.4451	74.4035	51.8913	7.31409	45.7047	39.2256	17.836	45.8331	43.1135	55.7232	23.4249	56.6989	43.1512	7.89865	59.4722	13.8794	15.8613	25.6079	10.0873	16.2737	3.37065	0.000191806	0.33767	s
1.03_395.1929m/z	395.193	1.02988	pos	2M+Na	C8H14N2O3	7.4804	98.473	100 - 9.66 - 1.03	HMDB0029010	Prolyl-Alanine	Organic compounds	Organic acids and derivatives	Carboxylic acids and derivatives	152.741	80.496	73.6528	177.199	82.3387	81.0062	64.4499	75.8877	48.2687	77.0445	72.4935	44.3435	53.2442	59.2953	64.9302	33.408	38.8398	93.5667	41.7865	59.7484	75.1484	29.022	43.0246	67.954	0.00834684	0.336462	s
0.59_130.0522m/z	130.052	0.589133	neg	M-H	C5H9NO3	9.3803	93.6707	100 - 5.99 - 0.766	HMDB0059659	Trans-3-hydroxy-L-proline	Organic compounds	Organic acids and derivatives	Carboxylic acids and derivatives	10.5591	30.3843	26.3489	16.3582	44.7548	40.7604	63.4601	37.0622	55.0055	61.507	63.7126	84.0303	45.5574	41.4798	48.5001	89.0878	117.812	61.3194	64.2443	56.8248	61.4201	106.193	90.7532	83.5905	0.00334752	0.336247	s
1.61_455.0953m/z	455.095	1.61348	neg	2M-H	C5H13N2O6P	0.712194	92.6515	100 - 6.52 - 1.41	HMDB0031950	L-2-Aminoethyl seryl phosphate	Organic compounds	Organic acids and derivatives	Carboxylic acids and derivatives	83.0771	128.43	116.538	86.9494	165.665	165.489	135.965	150.708	122.297	149.319	202.295	153.235	77.5299	86.4137	99.9017	84.8179	112.314	99.4364	64.4747	75.6901	74.5368	87.1971	116.689	90.4348	0.000579605	0.333302	s
6.91_674.5336n	675.541	6.90528	pos	M+H, M+Na	C37H75N2O6P	-3.96049	84.8406	100 - 41.8 - 9.77 - 1.65 - 0.221	HMDB0012097	SM(d18:1/14:0)	Organic compounds	Lipids and lipid-like molecules	Sphingolipids	117.83	344.535	286.714	29.6053	222.564	106.803	789.96	344	683.122	638.443	290.187	530.162	483.014	391.192	100.973	377.07	369.443	28.3235	704.932	272.405	365.588	503.971	277.263	319.256	0.00923549	0.328675	s
4.93_321.2174m/z	321.217	4.92797	neg	M+Cl	C17H34O3	-9.71443	83.3186	100 - 18.9 - 2.3 - 0.211	HMDB0061663	12-hydroxyheptadecanoic acid	Organic compounds	Lipids and lipid-like molecules	Fatty Acyls	23.3955	16.3255	20.7818	37.5355	10.045	30.0743	93.5938	81.0995	70.4635	107.042	87.7115	82.9237	68.8995	66.7142	43.8338	64.4203	87.83	36.7771	85.07	68.5205	110.245	80.1172	65.2399	108.705	1.2794e-06	0.326509	s
0.82_244.1288m/z	244.129	0.817	neg	M-H	C10H19N3O4	-5.89286	87.7787	100 - 12.3 - 1.52 - 0.125	HMDB0028810	Glutaminylvaline	Organic compounds	Organic acids and derivatives	Carboxylic acids and derivatives	139.459	114.654	132.182	157.614	136.202	175.179	73.1555	95.9867	74.2001	87.5987	145.77	95.4541	93.5001	100.851	152.58	123.838	129.363	198.704	60.7158	83.4589	62.5858	52.7995	87.0856	71.8974	0.000359604	0.326404	s
0.80_387.1118m/z	387.112	0.802717	neg	2M-H	C10H10O4	8.4955	88.8351	100 - 11.1 - 1.38 - 0.107	HMDB0039606	Repandiol	Organic compounds	Organoheterocyclic compounds	Epoxides	125.652	127.159	117.2	85.7681	127.708	162.033	140.16	156.601	171.693	98.9078	115.176	92.5058	138.194	111.682	115.023	126.834	114.542	131.159	78.354	100.172	56.3928	62.9188	78.2663	44.8772	0.000669428	0.323785	s
2.09_935.3710m/z	935.371	2.08993	neg	M-H	C40H60N10O12S2	-5.41085	79.1874	100 - 49.7 - 23.6 - 7.56 - 2.08 - 0.474	HMDB0013033	Oxytocin 1-8	Organic compounds	Organic acids and derivatives	Carboxylic acids and derivatives	197.393	139.349	148.045	220.834	101.579	123.385	60.1473	113.629	96.2142	38.3551	141.797	106.615	115.376	126.716	184.249	142.839	88.9435	204.138	61.4957	108.703	62.219	39.7932	103.536	41.8966	0.00325056	0.320925	s
0.58_181.0703m/z	181.07	0.582	neg	M-H	C6H14O6	-7.87647	92.3246	100 - 6.88 - 1.43	HMDB0011632	L-Iditol	Organic compounds	Organic oxygen compounds	Organooxygen compounds	19.5813	35.0402	34.4857	22.0019	41.007	48.1019	79.5508	40.418	42.653	105.87	71.5343	60.1589	44.6017	55.2333	40.4538	49.7232	93.6576	48.9229	64.404	55.9238	81.7621	96.6432	96.9338	123.692	0.00222795	0.316192	s
1.89_262.1193m/z	262.119	1.89065	pos	M+CH3OH+H	C9H12FN3O3	-1.88175	97.2016	100 - 11.1 - 1.18	HMDB0041887	Endalin	Organic compounds	Nucleosides, nucleotides, and analogues	Pyrimidine nucleosides	114.38	63.6715	71.5444	158.491	57.0571	62.3517	44.5069	75.9718	52.141	51.2354	68.6799	43.706	51.4398	65.2443	96.1488	44.1754	65.9157	89.8394	35.0683	42.9252	37.1966	34.2561	37.2104	17.2104	0.00725601	0.314598	s
1.17_422.9428m/z	422.943	1.17273	neg	M+Cl	C6H15O13P3	2.11363	90.7082	100 - 7.16 - 2.89 - 0.194	HMDB0060500	NTP	Organic compounds	Organic oxygen compounds	Organooxygen compounds	4.73804	53.037	84.0772	10.8052	66.3009	93.8794	59.3605	58.3533	38.6211	59.4311	52.6223	43.1553	35.7706	26.1861	28.5692	25.1035	9.07233	11.7762	12.0863	21.1408	6.64385	12.9265	10.5443	17.6325	0.00444554	0.313022	s
1.32_227.1386m/z	227.139	1.32203	neg	M-H	C11H20N2O3	-6.55249	87.906	100 - 13 - 1.39 - 0.108	HMDB0011175	Leucylproline	Organic compounds	Organic acids and derivatives	Carboxylic acids and derivatives	270.929	223.409	218.597	317.46	258.17	294.642	211.439	241.175	195.966	262.994	320.709	251.234	222.9	258.819	245.893	312.149	343.657	321.837	151.51	194.52	132.034	225.653	232.745	168.93	0.00421369	0.311586	s
2.05_263.1410m/z	263.141	2.05423	pos	M+K	C14H24O2	0.741504	85.8808	100 - 15.5 - 1.53 - 0.113	HMDB0032524	Terpinyl isobutyrate	Organic compounds	Lipids and lipid-like molecules	Prenol lipids	55.324	47.6089	55.4272	71.7036	38.1304	28.3641	29.2993	51.0315	43.9298	6.45627	23.7264	32.3994	38.3725	19.4905	41.3316	30.3037	10.4836	47.1606	12.1914	12.7309	7.85203	4.46508	4.07225	3.96768	0.000258092	0.311043	s
4.60_372.1590m/z	372.159	4.6008	neg	M+Na-2H	C22H25NO3	2.46231	77.8619	100 - 24.6 - 3.5 - 0.367	HMDB0030192	Marmeline	Organic compounds	Benzenoids	Phenol ethers	72.0853	167.78	184.711	83.4158	219.897	200.714	242.061	211.417	266.488	236.65	240.21	220.219	212.322	315.423	175.842	241.687	301.641	233.052	211.348	247.396	215.235	196.056	233.245	212.157	0.00634903	0.308432	s
6.42_703.5080m/z	703.508	6.42168	pos	M+2H	C77H146O17P2	-1.44842	87.865	100 - 85.6 - 39.7 - 13.1 - 3.4 - 0.739 - 0.139	HMDB0123968	CL(8:0/18:2(9Z,11Z)/i-21:0/i-21:0)	Organic compounds	Lipids and lipid-like molecules	Glycerophospholipids	1696.5	1315.85	1255.8	1923.2	1629.44	1537.65	2135.55	2100.83	1358.33	2129.8	2485.49	1682.04	1434.59	1491.02	1299.71	1739.42	1679.97	1470.31	1542.41	1619.88	1508.41	1563.8	1632.76	1588.6	0.0141116	0.305529	s
1.78_290.1132m/z	290.113	1.77707	neg	M+FA-H	C13H15N3O2	-5.86417	86.4933	100 - 15.4 - 1.52 - 0.113	HMDB0060861	OR-1896	Organic compounds	Benzenoids	Benzene and substituted derivatives	181.203	87.7939	115.987	203.39	120.868	158.356	64.7342	111.341	76.4713	62.1176	151.025	111.796	113.988	86.8236	175.496	136.069	111.441	214.638	46.2918	64.2426	61.7939	47.6672	110.771	67.7797	0.00576971	0.305147	s
0.57_348.0790m/z	348.079	0.567717	pos	M+K	C19H19NOS	-9.30027	78.845	100 - 22 - 7.02 - 1.15 - 0.138	HMDB0015056	Ketotifen	Organic compounds	Organoheterocyclic compounds	Cycloheptathiophenes	11.3852	20.34	29.5578	11.7439	33.1655	33.7698	87.4656	70.055	93.7237	109.945	68.9735	100.21	33.9879	32.2633	61.6698	31.634	52.4421	29.9235	102.827	79.2347	89.7985	99.2397	77.338	98.258	8.43575e-09	0.301165	s
4.89_452.3377m/z	452.338	4.88513	pos	M+CH3OH+H	C25H41NO4	1.62271	83.0779	100 - 28 - 4.6 - 0.557	HMDB0062340	N-Palmitoyl tyrosine	Organic compounds	Organic acids and derivatives	Carboxylic acids and derivatives	100.016	159.907	161.856	114.404	195.06	200.621	212.582	192.735	212.822	199.861	203.801	230.497	229.555	279.606	240.335	258.986	230.723	202.352	238.105	203.376	179.539	223.738	224.548	151.556	0.000978512	0.301077	s
4.07_493.3143n	538.314	4.0672	neg	M+Cl, M+FA-H	C24H48NO7P	-5.13695	95.5945	100 - 27.1 - 4.98 - 0.686	HMDB0010383	LysoPC(16:1(9Z)/0:0)	Organic compounds	Lipids and lipid-like molecules	Glycerophospholipids	659.186	1037.11	1230.91	720.775	1162.5	1313.5	601.738	519.784	524.415	603.754	569.072	568.745	1084	1472.42	1429.07	1278.88	1473.39	1787.45	511.99	534.857	473.399	574.703	628.332	539.703	8.86586e-08	0.300947	s
5.92_832.6359m/z	832.636	5.92378	pos	M+CH3OH+H	C45H86NO8P	-8.38571	87.016	100 - 50.3 - 14 - 2.82 - 0.451	HMDB0114632	PE-NMe2(24:1(15Z)/14:1(9Z))	Organic compounds	Lipids and lipid-like molecules	Glycerophospholipids	154.808	173.973	164.023	138.154	193.324	186.248	296.005	271.911	181.192	283.184	273.983	202.267	177.956	240.058	235.928	207.063	225.844	193.692	267.944	259.287	222.013	260.178	251.244	202.884	0.000703561	0.30086	s
4.60_218.1677n	454.389	4.60083	pos	M+H, 2M+NH4	C15H22O	2.91434	98.6017	100 - 16.5 - 1.48	HMDB0134122	(2Z)-2-(phenylmethylidene)octan-1-ol	Organic compounds	Phenylpropanoids and polyketides	Cinnamyl alcohols	53.2739	93.4025	131.152	71.7412	81.8329	112.754	145.41	88.8382	111.238	108.15	82.059	127.708	258.704	259.278	253.769	274.515	256.699	208.605	114.236	173.132	135.683	123.515	68.8839	93.4342	8.97813e-09	0.300266	s
2.31_876.5872m/z	876.587	2.31067	pos	M+K	C48H88NO8P	-0.814056	57.7469	100 - 53.6 - 15.7 - 3.3 - 0.548	HMDB0113738	PE-NMe(24:1(15Z)/18:3(9Z,12Z,15Z))	Organic compounds	Lipids and lipid-like molecules	Glycerophospholipids	4.75566	65.882	148.45	19.6185	105.984	247.315	223.34	125.045	225.904	195.909	202.545	316.958	164.966	274.617	110.987	203.157	167.123	199.232	232.941	203.817	100.052	207.115	197.768	160.319	0.033631	0.300134	s
2.06_999.3951m/z	999.395	2.06137	neg	2M+FA-H	C31H27NO4	9.30307	84.0578	100 - 34.4 - 6.54 - 0.897	HMDB0037510	Furcelleran	Organic compounds	Phenylpropanoids and polyketides	Cinnamic acids and derivatives	342.99	179.468	277.851	384.819	164.894	311.464	114.515	241.006	182.356	95.7222	291.055	203.67	281.158	191.648	387.457	309.271	187.509	440.314	140.499	189.979	116.289	142.291	211.767	107.802	0.0122107	0.298427	s
2.42_445.2593m/z	445.259	2.42423	neg	M+Na-2H	C24H40O6	5.12746	87.2969	100 - 26.6 - 4.64 - 0.607	HMDB0013158	1b,3a,7b-Trihydroxy-5b-cholanoic acid	Organic compounds	Lipids and lipid-like molecules	Steroids and steroid derivatives	486.525	390.171	470.24	565.52	444.888	458.786	109.23	316.723	284.46	75.541	374.589	263.794	410.856	404.264	645.613	640.786	393.557	769.446	233.024	298.385	231.408	217.634	259.169	251.641	5.9602e-05	0.295696	s
0.82_279.1355m/z	279.135	0.82415	pos	M+Na	C17H20O2	-0.242396	95.4486	100 - 18.7 - 2.06 - 0.168	HMDB0033680	Falcarindione	Organic compounds	Organic oxygen compounds	Organooxygen compounds	71.1588	51.5473	68.4652	80.2813	50.1663	67.7269	45.1565	57.7503	72.1456	36.3922	60.2544	49.1153	54.9505	28.9255	61.1103	25.0862	25.0875	62.2873	38.0228	35.081	14.3029	32.5656	38.3112	28.203	0.00207811	0.295056	s
0.82_217.1180m/z	217.118	0.817	neg	M-H	C9H18N2O4	-6.33488	89.0612	100 - 10.8 - 1.35 - 0.104	HMDB0028916	Isoleucyl-Serine	Organic compounds	Organic acids and derivatives	Carboxylic acids and derivatives	94.7528	43.1277	37.4703	123.186	61.9167	52.4852	6.4173	22.8724	29.9305	0.567346	39.7218	24.3061	28.5885	38.5169	53.0102	32.9724	53.6109	70.4897	0	17.6871	17.3722	11.5724	18.0632	17.368	0.000450149	0.293822	s
0.74_160.8807m/z	160.881	0.738433	neg	M+Na-2H	Ce	4.62529	0.0982657	0.209 - 0 - 0.284 - 0 - 100 - 0 - 12.6	HMDB0013672	Cerium	Inorganic compounds	Homogeneous metal compounds	Homogeneous lanthanide compounds	79.2569	51.7357	81.7951	66.4024	64.5964	99.9396	78.2809	57.2864	70.3635	76.6761	75.3774	53.9268	59.6142	54.8553	72.2178	56.2275	79.4667	63.4741	56.4387	55.004	37.9572	32.3214	32.9844	18.2092	0.00086021	0.291724	s
3.63_432.2386m/z	432.239	3.62648	pos	M+ACN+H	C22H30O6	1.26293	96.478	100 - 24.4 - 4.07 - 0.511	HMDB0035922	Nigakihemiacetal B	Organic compounds	Lipids and lipid-like molecules	Prenol lipids	375.688	453.828	484.3	443.146	654.877	588.617	720.491	656.147	671.77	779.064	900.163	853.432	424.445	557.714	619.993	540.603	583.424	726.473	666.11	710.599	564.165	650.342	789.251	615.32	0.000729219	0.289635	s
3.98_311.2213m/z	311.221	3.97505	neg	2M-H	C9H16O2	-4.68927	90.8398	100 - 9.99 - 0.858	HMDB0060286	3,4-Epoxynonanal	Organic compounds	Organic oxygen compounds	Organooxygen compounds	61.0826	32.8805	43.4698	56.7024	35.5038	52.4568	69.9594	69.4548	48.5513	57.5166	78.0508	52.5947	69.0901	57.6577	74.6668	91.864	53.2201	102.639	68.0883	87.5399	102.464	67.5259	48.8337	117.604	0.0156754	0.285997	s
0.81_179.0494m/z	179.049	0.809867	pos	M+H	C5H10N2O3S	4.92069	88.8368	100 - 7.17 - 5.36 - 0.336	HMDB0000078	Cysteinylglycine	Organic compounds	Organic acids and derivatives	Carboxylic acids and derivatives	24.9413	59.2993	60.0716	26.7116	81.1564	90.07	125.588	84.2519	125.163	144.341	120.197	141.971	101.898	133.959	46.9415	97.0965	130.999	87.9001	130.492	108.987	79.8302	167.396	113.582	101.728	0.00217562	0.282431	s
4.47_537.2540m/z	537.254	4.46578	neg	2M+FA-H	C15H18O3	9.39546	97.3041	100 - 16.5 - 1.9 - 0.163	HMDB0036767	Zederone	Organic compounds	Organooxygen compounds	Carbonyl compounds	35.812	96.6317	69.4076	26.8849	86.5995	76.9792	150.958	114.502	130.527	122.298	130.539	104.824	87.1861	121.207	84.7097	82.3142	89.6409	63.1865	134.465	141.572	113.397	151.575	113.657	106.177	7.71025e-05	0.28035	s
2.48_398.2157n	397.208	2.48138	neg	M-H, M+FA-H	C22H27FN4O2	9.82906	86.2682	100 - 25.6 - 3.57 - 0.353	HMDB0015397	Sunitinib	Organic compounds	Organoheterocyclic compounds	Indoles and derivatives	514.094	562.847	610.035	590.927	575.252	628.863	510.284	558.557	422.012	328.741	635.448	416.407	494.573	519.503	639.346	712.535	603.311	784.541	389.549	481.045	416.236	446.419	400.318	499.682	0.00324476	0.279952	s
7.34_725.4995n	726.507	7.33958	pos	M+H, M+Na	C40H72NO8P	-0.0652615	91.0487	100 - 44.8 - 11.4 - 2.13 - 0.317	HMDB0114154	PE-NMe2(18:4(6Z,9Z,12Z,15Z)/15:0)	Organic compounds	Lipids and lipid-like molecules	Glycerophospholipids	69.7571	341.7	280.145	14.8414	319.776	234.399	277.845	105.353	232.701	166.816	58.9661	233.611	1132.03	947.042	46.7269	1033.93	1063.38	97.4462	288.104	138.587	123.012	266.221	124.717	144.128	0.00473559	0.279084	s
1.98_533.2425m/z	533.243	1.9835	neg	M+FA-H	C27H36O8	6.72799	93.1135	100 - 29.9 - 5.96 - 0.892 - 0.109	HMDB0015262	Prednicarbate	Organic compounds	Lipids and lipid-like molecules	Steroids and steroid derivatives	133.816	25.7619	17.5806	116.94	9.35008	37.8717	5.50311	11.2585	7.37752	9.52223	14.8936	16.5808	26.0951	5.53662	37.6242	21.1777	6.93896	37.6843	2.82361	10.2267	2.5368	5.82482	9.42866	4.05588	0.0217799	0.278793	s
0.52_244.1652m/z	244.165	0.518417	pos	M+NH4	C11H18N2O3	-1.80676	48.3308	100 - 12.9 - 1.39 - 0.108	HMDB0015440	Amobarbital	Organic compounds	Organoheterocyclic compounds	Diazines	46.262	53.457	33.1601	21.723	44.8225	9.17224	30.968	28.7662	34.1133	21.4726	24.5217	19.5811	30.1249	21.227	33.0603	15.4775	21.0306	1.48252	1.56971	4.27844	8.57478	8.4608	3.25955	4.04293	0.000807805	0.276315	s
0.82_318.1342m/z	318.134	0.817	neg	M+Cl	C12H21N5O3	1.38632	87.1145	100 - 15.2 - 1.69 - 0.141	HMDB0028890	Histidinyl-Lysine	Organic compounds	Organic acids and derivatives	Carboxylic acids and derivatives	95.793	33.3965	17.9339	122.063	34.6917	17.4471	4.99168	13.2834	16.9021	7.27236	16.6028	15.9367	15.5576	24.4167	40.187	15.8756	34.8753	47.9706	0	12.8171	6.17912	0.0845056	5.1813	3.95502	0.00849288	0.275132	s
0.77_294.0688m/z	294.069	0.77415	neg	M-H2O-H	C16H12FN3O3	1.31897	89.2028	100 - 18.7 - 2.26 - 0.206	HMDB0015510	Flunitrazepam	Organic compounds	Organoheterocyclic compounds	Benzodiazepines	33.5434	31.237	35.3556	33.134	34.7644	36.9728	82.8151	46.381	72.2533	113.161	82.4953	105.009	32.9859	54.8024	45.6336	70.1978	94.1897	59.754	71.7756	65.9492	70.9406	104.508	99.9162	92.9459	0.000235844	0.273333	s
4.57_634.3320m/z	634.332	4.56508	neg	M-H2O-H	C30H49N6O10+	-1.79015	89.2128	100 - 35.6 - 8.21 - 1.42 - 0.201	HMDB0029803	Pentasine	Organic compounds	Organic acids and derivatives	Carboxylic acids and derivatives	308.095	740.527	720.681	308.73	607.662	682.91	439.275	393.999	318.351	414.612	352.235	291.454	844.423	1134.25	809.054	858.936	1090.6	881.456	413.967	427.385	624.486	430.559	493.589	592.99	3.0961e-06	0.272146	s
0.98_338.0559m/z	338.056	0.980583	neg	M-H2O-H	C19H16ClNO4	-8.42247	60.8418	100 - 21.3 - 34.9 - 7.1 - 0.975 - 0.101	HMDB0014473	Indomethacin	Organic compounds	Organoheterocyclic compounds	Indoles and derivatives	16.8057	39.0072	43.6032	12.5392	47.1253	48.1199	73.8647	66.8614	40.6466	74.2365	80.6017	56.6062	47.1391	61.4255	39.7618	61.0601	48.1656	49.0565	53.8253	59.774	80.5217	75.6901	79.6583	102.788	0.000540702	0.270367	s
0.82_382.0987m/z	382.099	0.817	neg	M-H	C14H17N5O8	-4.51799	96.045	100 - 17.5 - 3.08 - 0.361	HMDB0000912	Succinyladenosine	Organic compounds	Nucleosides, nucleotides, and analogues	Purine nucleosides	51.2046	44.8143	49.7212	59.4081	59.0917	64.7697	97.2275	79.1118	64.2643	132.797	132.551	96.6581	92.4135	132.784	119.243	113.619	145.849	162.915	79.8459	92.8661	76.7009	107.542	108.676	92.33	5.20217e-05	0.268356	s
0.82_373.2804m/z	373.28	0.817017	pos	2M+H	C9H18N2O2	-1.56211	92.6804	100 - 10.7 - 0.935	HMDB0033553	3-[(3-Methylbutyl)nitrosoamino]-2-butanone	Organic compounds	Organooxygen compounds	Carbonyl compounds	85.6013	51.078	75.5932	83.7531	74.1964	89.2798	15.378	53.6888	49.055	6.03587	81.6872	61.3625	86.8592	27.3239	121.39	74.5474	13.2153	122.89	3.82597	36.6593	9.30921	10.9329	43.7849	7.03131	0.00760706	0.260899	s
3.01_405.1028n	426.077	3.01498	neg	M+Na-2H, M+FA-H	C18H19N3O6S	8.13885	79.5441	100 - 21.8 - 8.02 - 1.37 - 0.213	HMDB0014827	Cephaloglycin	Organic compounds	Organoheterocyclic compounds	Lactams	41.5282	64.6821	82.6905	60.5484	81.719	87.3882	96.9249	70.3285	85.2666	98.2682	84.8058	58.4637	85.6432	92.1886	102.749	111.836	99.4832	125.048	84.5048	86.0269	128.798	109.06	59.085	126.838	0.0266518	0.260804	s
0.82_149.1045n	343.197	0.82415	neg	M-H2O-H, 2M+FA-H	C6H15NO3	-4.72306	95.1053	100 - 7.14 - 0.836	HMDB0032538	Triethanolamine	Organic compounds	Organonitrogen compounds	Amines	355.699	288.694	350.478	369.962	390.16	369.412	194.588	188.029	123.436	249.245	427.248	174.693	231.701	258.556	434.175	261.345	386.103	585.859	175.74	246.2	250.463	182.427	237.826	303.023	0.0244481	0.260474	s
0.75_204.1240m/z	204.124	0.752717	pos	M+H-H2O	C10H15N5O	-1.48427	90.8194	100 - 12.9 - 0.97	HMDB0012215	Dihydrozeatin	Organic compounds	Organoheterocyclic compounds	Imidazopyrimidines	134.596	192.326	282.284	135.211	275.586	446.332	233.405	150.632	188.699	228.7	195.574	231.782	433.28	491.856	663.827	450.534	480.624	416.092	246.76	243.633	202.708	269.633	251.155	231.691	8.59905e-06	0.260454	s
0.84_467.2636n	468.232	0.838433	pos	M+H-2H2O, M+H	C18H37N5O9	9.58896	92.7142	100 - 22.1 - 4.17 - 0.563	HMDB0014822	Tobramycin	Organic compounds	Organic oxygen compounds	Organooxygen compounds	101.731	64.367	67.5685	111.543	56.3273	73.8529	24.8883	54.0799	33.8252	13.9395	54.66	22.8977	76.1154	42.5819	113.869	41.1715	13.4584	102.219	37.4656	39.8753	9.71303	11.192	41.238	13.1905	0.00413731	0.259384	s
2.87_236.0951m/z	236.095	2.87213	neg	M-H	C12H15NO4	9.4506	87.6222	100 - 13.7 - 1.69 - 0.145	HMDB0139939	3-(3,4-dihydroxyphenyl)-N-(3-oxopropyl)propanimidic acid	Organic compounds	Benzenoids	Phenols	65.3903	81.1014	98.0621	76.3481	91.0807	128.152	124.178	136.403	95.9168	164.42	161.953	115.006	93.9272	111.417	105.945	111.591	154.335	145.897	130.889	114.53	116.237	166.922	133.445	158.566	0.011141	0.258388	s
2.72_486.2138m/z	486.214	2.72283	neg	M+FA-H	C26H27N5O2	-2.01183	92.8176	100 - 30.3 - 4.86 - 0.544	HMDB0015637	Vilazodone	Organic compounds	Organoheterocyclic compounds	Diazinanes	188.743	193.246	200.446	233.766	244.471	280.597	234.338	185.486	159.209	277.393	271.488	188.795	243.201	342.444	270.756	282.941	387.715	326.664	230.104	267.364	225.419	273.216	289.855	234.03	0.00567886	0.255927	s
4.71_315.1755m/z	315.176	4.71442	pos	2M+Na	C7H14O3	-7.85008	97.2824	100 - 7.85 - 0.883	HMDB0061653	3-hydroxyheptanoic acid	Organic compounds	Organic acids and derivatives	Hydroxy acids and derivatives	13.9658	11.7598	23.0612	10.3643	25.2534	21.5351	70.2692	58.0839	56.767	61.1389	60.2792	98.1261	33.3355	25.0686	27.8458	25.584	11.1349	34.395	76.6214	83.0316	62.3792	67.6601	51.2037	79.5166	3.35671e-08	0.254554	s
1.36_605.2557m/z	605.256	1.36418	neg	2M-H	C14H17N5O3	-5.39075	86.3259	100 - 17.3 - 2.02 - 0.178	HMDB0041989	Pipemidic acid	Organic compounds	Organoheterocyclic compounds	Diazinanes	119.628	70.937	65.8292	99.897	62.1727	76.7005	21.8594	61.5929	22.973	20.1143	76.2013	38.658	51.4568	52.8725	103.156	77.2578	61.2748	114.065	13.5992	33.8605	15.5579	30.6301	51.6488	24.1542	0.000671212	0.25326	s
0.82_406.2018n	441.174	0.817	neg	M+Na-2H, M+Cl	C22H30O7	6.61762	76.444	100 - 24.4 - 4.29 - 0.562	HMDB0041091	1-(4-Hydroxy-3,5-dimethoxyphenyl)-7-(4-hydroxy-3-methoxyphenyl)-3,5-heptanediol	Organic compounds	Phenylpropanoids and polyketides	Diarylheptanoids	92.1215	21.4961	19.968	99.9511	17.4202	7.70363	3.31801	2.53624	4.92363	1.72711	4.70262	0.0256195	4.49495	5.145	18.2513	1.62097	15.2773	10.2335	0.028633	4.81778	3.93665	6.02162	1.30009	6.53409	0.0096892	0.250728	s
3.05_347.2421m/z	347.242	3.05	neg	3M-H	C6H12O2	-5.17756	93.193	100 - 6.7 - 0.601	HMDB0061883	Caproate (6:0)	Organic compounds	Lipids and lipid-like molecules	Fatty Acyls	14.0558	15.2027	12.8087	15.8552	16.4439	11.7701	26.4254	17.5618	14.9143	30.939	21.7849	8.89618	31.3494	42.2079	31.0613	31.1422	46.4096	36.0268	29.1998	31.944	41.4284	25.4712	28.2251	54.1995	7.52078e-05	0.250126	s
0.51_751.2448m/z	751.245	0.511267	neg	2M+FA-H	C20H19NO5	-8.62875	99.1464	100 - 22.4 - 3.42 - 0.392	HMDB0033445	Honyumine	Organic compounds	Organoheterocyclic compounds	Quinolines and derivatives	33.9322	58.2853	64.8026	40.1316	38.8875	61.4043	65.5036	59.1946	84.3965	98.0717	64.3329	87.5048	75.126	109.637	62.744	105.093	97.8002	47.1591	73.9503	70.199	83.4218	72.5363	110.086	78.9014	0.0133611	0.248245	s
0.82_693.3119m/z	693.312	0.82415	neg	2M+FA-H	C17H24O6	-1.37462	98.8978	100 - 18.9 - 2.92 - 0.327	HMDB0035357	Blumealactone C	Organic compounds	Lipids and lipid-like molecules	Prenol lipids	129.817	66.555	76.4931	118.605	89.9522	79.7969	18.9305	38.7343	19.1381	6.30773	89.5138	28.6467	57.6187	38.0802	111.095	52.6828	61.2186	139.444	15.4198	53.1173	24.9379	19.072	57.8595	35.0128	0.00289938	0.247099	s
2.37_380.1798m/z	380.18	2.37423	neg	3M-H	C6H9NO2	-7.63094	94.6067	100 - 7.03 - 0.623	HMDB0062589	1-piperideine-6-carboxylate	Organic compounds	Organic acids and derivatives	Carboxylic acids and derivatives	67.5229	43.2021	47.1659	72.3591	40.5327	46.0642	18.0862	45.9099	29.4728	12.3571	48.5347	33.3605	38.1557	29.7144	61.7909	41.7284	25.4278	69.8693	22.3241	22.861	23.0626	15.2589	11.9575	4.79934	0.00119295	0.24693	s
0.79_670.1712m/z	670.171	0.788433	neg	M+FA-H	C28H33O16+	-6.11494	76.7374	100 - 31.3 - 8.01 - 1.49 - 0.238	HMDB0125115	3-{[4,5-dihydroxy-6-(hydroxymethyl)-3-{[3,4,5-trihydroxy-6-(hydroxymethyl)oxan-2-yl]oxy}oxan-2-yl]oxy}-5,7-dihydroxy-2-(4-hydroxy-3-methoxyphenyl)-1位鈦?chromen-1-ylium	Organic compounds	Phenylpropanoids and polyketides	Flavonoids	47.7593	69.2723	61.9774	33.0922	104.79	103.855	87.56	103.254	154.442	118.229	122.828	222.222	117.795	158.124	103.567	230.454	200.184	127.682	93.9304	83.9519	68.1667	178.975	162.856	95.5915	0.0189156	0.246713	s
0.83_411.1778m/z	411.178	0.831283	neg	2M+FA-H	C9H13NO3	1.41527	93.8287	100 - 10.4 - 1.1	HMDB0061679	3,4,5,6-Tetrahydrohippuric acid	Organic compounds	Organic acids and derivatives	Carboxylic acids and derivatives	78.5062	58.1979	47.3618	69.4976	60.238	58.8197	17.3429	31.1702	21.7845	13.5115	40.2064	13.687	39.2377	28.1787	76.7928	36.8152	41.1857	68.6389	14.1158	22.2772	19.5435	5.95138	30.8967	24.03	2.62996e-05	0.246701	s
1.09_244.1289m/z	244.129	1.08703	neg	M-H	C10H19N3O4	-5.46087	87.7787	100 - 12.3 - 1.52 - 0.125	HMDB0029141	Valyl-Gamma-glutamate	Organic compounds	Organic acids and derivatives	Carboxylic acids and derivatives	156.199	119.991	137.121	179.297	153.246	176.366	87.2646	127.373	100.219	111.942	184.717	142.316	136.094	138.388	179.071	187.972	153.067	242.966	73.541	94.9262	60.1029	95.2931	123.249	90.4718	0.00090967	0.246244	s
7.77_683.0115m/z	683.012	7.77313	neg	3M-H	C13H8S2	-2.11683	79.5057	100 - 15.8 - 10.2 - 1.4 - 0.342	HMDB0029735	5-Ethynyl-5'-(1-propynyl)-2,2'-bithiophene	Organic compounds	Organoheterocyclic compounds	Bi- and oligothiophenes	78.1022	105.048	125.038	91.8879	67.1612	112.993	166.227	126.366	143.017	149.41	95.3721	159.454	143.877	155.705	89.5545	175.562	154.91	98.8297	148.269	132.711	133.903	130.343	171.179	99.1882	0.0351846	0.241071	s
4.56_563.2691m/z	563.269	4.55793	neg	M+FA-H	C25H42O11	-3.46443	86.1546	100 - 27.9 - 6.02 - 0.954 - 0.128	HMDB0031935	Blumenol C O-[rhamnosyl-(1->6)-glucoside]	Organic compounds	Lipids and lipid-like molecules	Fatty Acyls	69.6214	172.501	191.518	57.4668	161.847	172.172	178.436	125.388	125.295	147.206	114.798	107.192	215.216	327.076	190.742	224.219	283.354	207.97	167.329	187.869	159.669	151.251	135.031	141.624	0.000757431	0.240668	s
2.20_279.1346m/z	279.135	2.20353	pos	2M+H	C7H9NO2	2.25833	99.0098	100 - 8.12 - 0.699	HMDB0012153	3,4-Dihydroxybenzylamine	Organic compounds	Benzenoids	Phenols	142.346	108.565	150.432	196.983	162.55	231.842	79.1179	113.896	79.481	65.2469	141.265	69.0361	219.169	183.914	298.75	246.541	179.06	374.843	144.755	203.046	152.687	134.318	219.843	169.902	0.00022429	0.232637	s
0.55_374.0878n	355.07	0.546283	neg	M-H2O-H, M+Na-2H	C15H18O11	7.73959	98.1972	100 - 16.8 - 3.59 - 0.446	HMDB0128012	6-[4-(2-carboxyethyl)-2,6-dihydroxyphenoxy]-3,4,5-trihydroxyoxane-2-carboxylic acid	Organic compounds	Organic oxygen compounds	Organooxygen compounds	39.9886	44.9815	55.9046	31.538	49.9581	61.3972	74.6266	38.8198	51.2772	56.7009	53.5526	66.752	63.3257	69.4618	55.5396	59.7022	114.182	52.116	53.4305	72.2654	84.85	77.3668	72.7605	71.0322	0.0368485	0.232538	s
6.20_401.3416m/z	401.342	6.20165	pos	M+CH3OH+H	C26H40O	0.51373	94.5484	100 - 28.6 - 4.15 - 0.407	HMDB0037826	(E)-26,27-Dinorergosta-4,22-dien-3-one	Organic compounds	Lipids and lipid-like molecules	Steroids and steroid derivatives	14.9939	28.3582	46.7024	8.33816	22.1158	32.9429	68.1604	56.6493	54.9609	45.0385	45.9209	59.347	32.5738	58.4649	15.4634	47.4076	50.4542	35.7062	83.2818	42.2007	50.6432	79.2213	44.3955	62.255	0.00173007	0.232259	s
0.80_635.1387m/z	635.139	0.795567	neg	3M-H	C13H8O3	6.24016	88.7369	100 - 14.3 - 1.56 - 0.126	HMDB0032999	4-Hydroxyxanthone	Organic compounds	Organoheterocyclic compounds	Benzopyrans	6.68872	22.9683	23.2379	4.58439	29.197	23.5479	72.2516	37.4426	89.699	88.4921	66.4666	116.703	45.2243	90.0923	44.9683	63.9052	118.438	53.7752	75.9309	45.4489	33.466	111.58	68.929	36.2187	0.00268057	0.231055	s
0.54_366.0998n	401.058	0.539133	neg	M+Na-2H, M+Cl	C22H19ClO3	-6.76718	71.4711	100 - 24.1 - 35.4 - 8.06 - 1.12 - 0.115	HMDB0015249	Atovaquone	Organic compounds	Benzenoids	Naphthalenes	8.2882	23.403	24.7865	18.8165	28.0724	41.0731	59.5361	51.6702	51.069	68.2465	61.1812	75.1404	39.4459	45.6843	25.7649	35.0855	59.9342	23.3373	51.8192	57.4983	53.9904	76.6579	77.037	57.8024	1.45763e-05	0.230752	s
4.92_1009.0202m/z	1009.02	4.92082	neg	2M-H	C12H20N4O10P3S+	4.86136	81.9885	100 - 15.9 - 7.75 - 1.06 - 0.207	HMDB0001512	Thiamine triphosphate	Organic compounds	Organoheterocyclic compounds	Diazines	58.1266	75.6045	72.2361	42.2008	41.1905	59.4823	129.953	97.8829	123.186	119.048	58.2521	84.8469	111.104	136.446	86.8241	49.2981	80.9483	56.4215	115.832	109.071	108.668	93.3918	87.6339	87.9488	0.0138987	0.22921	s
5.85_513.3871m/z	513.387	5.84592	pos	M+2H	C69H100O6	7.4895	77.8475	100 - 76 - 29.7 - 7.95 - 1.63 - 0.274	HMDB0055937	TG(22:6(4Z,7Z,10Z,13Z,16Z,19Z)/22:5(4Z,7Z,10Z,13Z,16Z)/22:6(4Z,7Z,10Z,13Z,16Z,19Z))	Organic compounds	Lipids and lipid-like molecules	Glycerolipids	290.325	230.313	262.943	369.496	369.586	348.6	448.582	432.277	272.323	530.4	533.569	344.398	329.863	312.992	350.395	415.657	335.411	324.145	394.409	447.915	369.475	373.372	438.912	395.394	0.0216524	0.226132	s
1.55_433.2066m/z	433.207	1.5492	neg	2M-H	C8H15N3O4	3.23141	89.8037	100 - 10.1 - 1.28	HMDB0028790	Glutaminylalanine	Organic compounds	Organic acids and derivatives	Carboxylic acids and derivatives	49.6755	40.7394	30.5263	52.8122	27.5285	46.4779	17.7292	42.2349	20.6624	19.2846	47.794	6.76678	24.785	10.6529	52.1676	9.58328	9.0557	53.6482	9.29135	22.2705	10.8567	10.5519	14.4146	19.8278	0.0355898	0.223444	s
0.82_588.0699m/z	588.07	0.817	neg	M-H	C16H25N5O15P2	-8.57615	81.9982	100 - 20 - 4.98 - 0.729 - 0.108	HMDB0001499	GDP-D-Rhamnose	Organic compounds	Nucleosides, nucleotides, and analogues	Purine nucleotides	128.913	187.179	194.525	116.145	244.07	235.008	206.805	120.496	153.443	231.647	188.897	175.439	186.483	276.86	203.467	280.475	365.415	284.966	188.387	165.939	175.645	254.717	224.967	220.114	0.0228443	0.223139	s
4.37_255.2316m/z	255.232	4.37293	neg	2M-H	C8H16O	-5.42165	95.1668	100 - 8.87 - 0.552	HMDB0061913	3,5-Dimethylcyclohexanol	Organic compounds	Organic oxygen compounds	Organooxygen compounds	7.11186	18.8116	15.2843	6.26977	11.8347	29.4602	48.1731	37.0182	37.5093	26.9167	39.8118	22.9766	40.8869	61.9172	44.9572	52.1387	48.076	54.3625	42.8742	45.6954	30.2872	44.1572	33.0932	18.8901	1.53044e-05	0.219593	s
4.86_776.5734m/z	776.573	4.85727	pos	2M+NH4	C22H37NO4	-6.54849	92.9155	100 - 24.7 - 3.75 - 0.424	HMDB0002304	Leukotriene B4 ethanolamide	Organic compounds	Organic nitrogen compounds	Organonitrogen compounds	106.738	113.261	178.465	105.379	102.225	195.728	239.158	190.809	159.965	280.614	178.392	200.414	160.859	187.063	211.381	180.022	217.478	233.364	167.794	199.572	221.272	149.957	149.938	191.927	0.00967826	0.217038	s
1.39_613.2719m/z	613.272	1.39275	neg	2M-H	C16H21NO5	-7.71779	95.1629	100 - 18.1 - 2.57 - 0.268	HMDB0038582	5-Amino-2,3-dihydro-6-(3-hydroxy-4-methoxy-1-oxobutyl)-2,2-dimethyl-4H-1-benzopyran-4-one	Organic compounds	Organoheterocyclic compounds	Benzopyrans	195.941	70.4795	67.9924	167.837	56.3942	74.5762	5.74052	71.1199	16.6056	2.31948	43.2423	23.6377	64.5039	46.8959	163.675	92.9972	30.406	176.182	17.0261	56.6193	24.2988	34.9734	36.9992	38.2124	0.0111041	0.215301	s
2.98_240.0986n	239.091	2.97927	neg	M-H2O-H, M-H	C12H16O5	-4.68158	88.4824	100 - 13.4 - 1.85 - 0.168	HMDB0125804	2-(hydroxymethyl)-7-methoxy-2-methyl-3,4-dihydro-2H-1-benzopyran-4,5-diol	Organic compounds	Organoheterocyclic compounds	Benzopyrans	230.858	242.581	278.013	279.38	289.191	318.073	302.311	255.967	371.087	321.927	272.574	282.511	330.716	424.692	284.221	364.694	443.64	307.186	321.77	342.713	320.129	300.642	247.896	276.421	0.0237247	0.210218	s
0.63_184.0745m/z	184.074	0.632	pos	M+K	C7H15NO2	7.0647	95.7538	100 - 8.19 - 0.704	HMDB0006831	3-Dehydroxycarnitine	Organic compounds	Lipids and lipid-like molecules	Fatty Acyls	127.569	279.418	348.889	180.753	470.862	557.856	92.153	50.2609	68.9185	89.2444	48.9378	102.723	498.019	631.995	554.406	505.644	701.729	436.213	107.938	81.3228	61.9112	104.845	58.1847	52.8543	5.70055e-08	0.2058	s
0.54_454.9248m/z	454.925	0.539133	neg	3M-H	C4H8S3	-9.58882	67.8107	100 - 6.82 - 13.8 - 0.819 - 0.696	HMDB0037290	3-Methyl-1,2,4-trithiane	Organic compounds	Organoheterocyclic compounds	Trithianes	37.5998	71.3024	91.2078	24.0793	81.34	88.4771	91.5715	73.854	83.6251	77.1084	69.4957	114.42	103.061	142.774	84.8664	97.9871	144.953	82.5428	93.3126	85.8345	74.3324	112.659	88.7983	77.3895	0.0262314	0.205419	s
8.45_731.5475n	732.555	8.44895	pos	M+H, M+K, M+Na	C40H78NO8P	1.41766	97.5012	100 - 44.8 - 11.5 - 2.13 - 0.319	HMDB0009252	PE(20:1(11Z)/15:0)	Organic compounds	Lipids and lipid-like molecules	Glycerophospholipids	1356.91	2767.48	2918.56	565.593	3718.91	2754.17	1773.76	761.288	2016.23	1119.95	574.782	2008.73	5094.76	8282.42	1822.04	5605.73	10141.3	1406.48	2041.65	1197.37	831.744	2213.07	975.476	870.107	0.00373661	0.203525	s
2.42_376.1527m/z	376.153	2.42423	neg	M+FA-H	C14H25N3O4S	-6.16257	86.3539	100 - 17.5 - 6.78 - 0.971 - 0.134	HMDB0037324	Alitame	Organic compounds	Organic acids and derivatives	Carboxylic acids and derivatives	72.178	48.3697	19.8087	86.4521	49.3878	20.6675	7.30847	28.4615	41.8836	9.98027	27.6745	37.8788	25.2477	28.065	32.3666	31.7515	35.2557	38.8608	12.6545	23.5662	29.3293	15.2599	16.8779	32.5762	0.0317514	0.203392	s
2.50_353.1058m/z	353.106	2.50282	neg	M+FA-H	C19H16O4	8.89849	92.2217	100 - 20.9 - 2.89 - 0.301	HMDB0037109	(1S,2R,3S)-2,3-Dihydro-4-(4-hydroxyphenyl)-1H-phenalene-1,2,3-triol	Organic compounds	Benzenoids	Naphthalenes	2331.17	2074.73	2296.17	2474.31	2375.86	2691	2208.84	2222.83	1684.65	2092.3	2847.2	2072.81	1965.63	2357.74	2693.38	2792.9	2782.22	3417.48	1809.83	2081.6	2105.29	1875.01	2368.19	2302.46	0.0413445	0.201509	s
4.90_341.3086m/z	341.309	4.89942	pos	M+H-H2O	C21H42O4	9.98426	80.2417	100 - 23.3 - 3.42 - 0.376	HMDB0072877	MG(0:0/i-18:0/0:0)	Organic compounds	Lipids and lipid-like molecules	Glycerolipids	14.1764	29.1726	40.651	13.6458	26.3929	28.9299	42.5724	35.1082	38.9897	41.5015	39.7565	51.2755	35.2241	36.4229	29.507	33.387	30.6883	19.05	48.1072	41.5977	50.0258	57.6721	44.0361	53.004	6.23e-05	0.20043	s
0.80_306.1284m/z	306.128	0.802717	neg	M+FA-H	C10H19N3O5	-8.85912	87.8522	100 - 12.3 - 1.73 - 0.15	HMDB0002248	Gamma glutamyl ornithine	Organic compounds	Organic acids and derivatives	Carboxylic acids and derivatives	57.6923	126.178	101.809	39.3478	149.291	122.078	211.063	125.806	212.6	255.848	220.118	258.816	112.319	227.187	131.316	172.987	286.999	136.229	181.726	163.361	158.541	185.278	151.271	126.349	0.00423558	0.199793	s
2.75_701.3822m/z	701.382	2.7514	neg	2M+FA-H	C20H26NO3+	2.26444	55.8614	100 - 22.4 - 3.01 - 0.3	HMDB0034579	8-O-Methyloblongine	Organic compounds	Organoheterocyclic compounds	Isoquinolines and derivatives	391.755	209.665	188.926	585.282	271.733	132.377	99.3938	164.483	256.471	86.8281	213.426	142.703	370.415	428.078	554.669	379.217	420.975	583.079	214.294	320.646	275.84	226.617	310.876	291.193	0.000813251	0.198292	s
0.87_215.1390m/z	215.139	0.8663	neg	M-H	C10H20N2O3	-5.36592	88.3749	100 - 11.9 - 1.26	HMDB0029140	Valyl-Valine	Organic compounds	Organic acids and derivatives	Carboxylic acids and derivatives	51.5844	15.3804	14.4546	60.8363	33.6443	26.1542	10.7459	12.56	16.3146	11.4049	20.8196	38.4009	17.4611	35.4833	29.3007	23.8016	37.4956	33.2576	11.0494	9.23818	5.65701	14.4719	4.46674	3.22305	0.00503772	0.196496	s
4.32_422.2655m/z	422.265	4.32363	neg	3M-H	C6H11N3O	4.98481	92.4054	100 - 7.75 - 0.469	HMDB0003431	L-Histidinol	Organic compounds	Organic nitrogen compounds	Organonitrogen compounds	16.708	60.6835	47.99	15.4891	62.6083	50.3696	81.1025	53.6368	65.3693	66.2427	48.9111	59.8887	65.7554	90.2966	58.5217	65.1121	74.1554	61.8797	64.1394	63.8865	54.8522	74.4418	61.0586	59.2514	0.0155877	0.192581	s
1.97_429.1978m/z	429.198	1.96922	neg	2M+FA-H	C9H20S2	-4.37504	83.9646	100 - 11.6 - 9.65 - 0.992 - 0.294	HMDB0031710	1,9-Nonanedithiol	Organic compounds	Organosulfur compounds	Thiols	141.821	67.4315	73.135	135.48	72.427	113.781	36.4046	66.1496	36.323	52.8188	91.5981	52.4979	74.4257	60.7909	108.005	118.409	94.9317	130.62	44.3933	51.9434	44.6653	38.2851	94.3058	49.8169	0.0049122	0.192247	s
0.77_431.9948m/z	431.995	0.767017	pos	M+H	C15H14ClN3O4S3	9.42331	53.9724	100 - 20 - 48.2 - 9.29 - 6.25 - 1.08 - 0.369	HMDB0014702	Benzthiazide	Organic compounds	Organoheterocyclic compounds	Thiadiazines	32.6588	51.9683	64.8688	37.6251	72.7614	83.468	77.1009	72.3314	62.4553	80.0007	83.8063	99.6259	69.7588	89.0921	46.6478	77.0549	76.3483	85.0129	68.461	87.7485	73.9035	81.0042	84.3027	93.133	0.0402141	0.188996	s
0.96_118.0663m/z	118.066	0.959167	pos	M+H	C8H7N	9.87638	91.3535	100 - 9.1 - 0.366	HMDB0000738	Indole	Organic compounds	Organoheterocyclic compounds	Indoles and derivatives	31.3383	26.4296	31.936	45.4	36.0696	61.5098	39.5235	31.0277	37.0704	43.9063	43.3838	44.8886	53.5755	46.4334	48.8906	72.8322	45.33	60.026	39.9645	53.0617	64.4384	48.6227	52.5847	55.5282	0.0159092	0.187399	s
4.06_450.2607m/z	450.261	4.06005	neg	M-H	C21H42NO7P	-4.17627	84.735	100 - 23.8 - 4.15 - 0.539	HMDB0011504	LysoPE(16:1(9Z)/0:0)	Organic compounds	Lipids and lipid-like molecules	Glycerophospholipids	267.157	519.115	774.029	300.581	550.808	858.458	463.32	349.6	324.82	465.352	354.705	341.326	640.641	729.296	621.655	762.708	726.43	729.98	346.858	332.234	355.04	360.457	370.336	352.963	0.000397016	0.187352	s
1.57_560.2190m/z	560.219	1.57062	neg	M+FA-H	C20H37NO14	-1.23507	80.7686	100 - 23 - 5.39 - 0.835 - 0.119	HMDB0006595	Alpha-Trisaccharide	Organic compounds	Organic oxygen compounds	Organooxygen compounds	143.912	69.3964	92.9324	113.005	86.556	101.973	45.6333	79.3366	43.6093	60.4171	103.071	52.1664	63.935	73.5281	121.838	86.9357	67.926	171.126	36.5366	73.4382	53.508	31.0127	102.402	48.1659	0.03936	0.186468	s
1.58_759.2319m/z	759.232	1.57777	neg	2M+FA-H	C18H19N3O3S	5.94089	83.4906	100 - 21.7 - 7.38 - 1.22 - 0.165	HMDB0005031	Rosiglitazone	Organic compounds	Benzenoids	Phenol ethers	126.156	55.9511	59.1855	112.159	50.742	53.1684	32.2917	71.2573	29.2113	10.016	54.6899	16.1052	70.989	27.1478	101.207	64.3207	28.8745	109.142	32.4798	48.9736	26.8689	27.0118	60.1008	11.3228	0.0355126	0.184472	s
3.45_249.0201m/z	249.02	3.44858	neg	M-H2O-H	C15H8O5	2.84495	89.0803	100 - 16.5 - 2.3 - 0.23	HMDB0002326	Coumesterol	Organic compounds	Phenylpropanoids and polyketides	Isoflavonoids	102.234	154.505	157.084	123.494	187.39	194.434	200.976	193.695	204.178	234.801	242.718	277.358	144.734	177.22	150.191	203.37	202.515	162.241	129.697	139.468	99.065	149.213	166.294	119.704	0.000207345	0.182635	s
1.29_226.0707n	261.04	1.29347	neg	M-H, M+Cl	C8H10N4O4	2.10266	89.5314	100 - 10.4 - 1.31	HMDB0011105	5-Acetylamino-6-formylamino-3-methyluracil	Organic compounds	Organoheterocyclic compounds	Diazines	81.7836	67.8214	56.61	73.9378	83.2722	60.5888	37.0704	63.4575	46.2099	62.8151	72.999	8.54371	63.7326	48.3126	98.4934	48.4136	73.4417	114.074	42.5143	52.2289	66.6496	14.772	8.66865	36.1604	0.0201503	0.180574	s
0.57_148.9490m/z	148.949	0.5677	neg	2M-H	CHNOS	3.5317	94.1276	100 - 2.3 - 4.74	HMDB0012974	Hypothiocyanite	Organic compounds	Organosulfur compounds	Thiocyanates	17.4689	29.1496	40.4099	15.7078	41.1755	45.5808	42.2417	30.4478	36.0572	56.9355	43.2709	46.5663	43.1744	60.3017	39.5572	63.6905	77.3591	47.1046	41.4836	33.9715	36.6445	57.5839	57.7602	55.9979	0.021423	0.179753	s
2.47_541.2460m/z	541.246	2.4671	neg	M+Na-2H	C28H40O9	7.97495	87.5456	100 - 31.1 - 6.52 - 1.03 - 0.133	HMDB0060141	rac-4-Hydroxy-4-O-(beta-D-glucuronide)-all-trans-retinyl acetate	Organic compounds	Lipids and lipid-like molecules	Prenol lipids	263.665	292.992	325.479	293.289	322.352	315.08	276.065	287.015	270.022	165.339	323.84	270.801	313.039	371.553	353.042	370.492	297.853	372.974	247.346	287.955	207.191	219.754	214.831	231.609	0.000239154	0.177626	s
0.82_315.1654m/z	315.165	0.82415	neg	M+Cl	C19H24N2	7.41039	80.7031	100 - 21.6 - 2.21 - 0.144	HMDB0030357	N-Methylaspidospermatidine	Organic compounds	Alkaloids and derivatives	Strychnos alkaloids	65.4246	45.0963	48.8845	62.182	58.5959	66.0271	15.3665	31.5876	19.682	20.2412	69.6971	9.05677	41.7064	25.3053	77.9763	55.2174	42.2962	102.123	14.167	28.4894	25.7665	8.17784	25.3076	30.3408	0.00397211	0.1771	s
1.24_868.3550m/z	868.355	1.24347	neg	M+Na-2H	C40H53N11O8S	0.454583	67.826	100 - 49 - 17.9 - 4.83 - 1.03 - 0.18	HMDB0013017	Neuromedin B (4-10)	Organic compounds	Organic acids and derivatives	Carboxylic acids and derivatives	52.2032	48.5331	59.318	47.794	33.9967	68.4372	36.6841	70.0464	45.954	22.0939	48.5971	39.8141	57.8117	39.6165	66.2316	53.4172	22.6544	66.0241	32.9908	43.8131	23.2637	26.8329	27.3021	12.0983	0.0264871	0.176539	s
2.04_371.1530m/z	371.153	2.03993	neg	3M-H	C7H8O2	7.98473	96.0774	100 - 7.74 - 0.67	HMDB0135619	3-methoxyphenol	Organic compounds	Benzenoids	Benzene and substituted derivatives	67.458	55.3652	62.1249	71.7261	56.8766	82.4258	10.1732	38.3167	16.0468	9.39797	62.0902	23.3642	68.5897	25.7326	113.7	68.4545	23.1271	130.034	11.2905	28.2486	19.6204	15.475	30.5543	17.4074	0.00268755	0.175417	s
4.46_418.3071m/z	418.307	4.45865	neg	M+Na-2H	C27H43NO	-5.22175	78.4501	100 - 30.1 - 4.58 - 0.47	HMDB0003236	Solanidine	Organic compounds	Lipids and lipid-like molecules	Steroids and steroid derivatives	67.2657	139.815	114.846	57.2232	143.915	121.562	145.446	112.67	129.116	117.055	93.3456	125.563	160.686	209.284	125.296	153.181	180.032	147.605	137.989	118.268	101.747	140.651	118.055	117.53	0.00910547	0.17498	s
0.55_222.0412m/z	222.041	0.546283	neg	M-H	C10H9NO5	1.86421	92.607	100 - 11.5 - 1.63 - 0.136	HMDB0004083	4-(2-Amino-3-hydroxyphenyl)-2,4-dioxobutanoic acid	Organic compounds	Organic oxygen compounds	Organooxygen compounds	18.737	19.0966	19.997	19.2571	27.9194	27.4071	36.8861	18.1707	22.3469	31.1618	36.7125	31.9787	29.4346	29.9336	28.6732	46.2081	40.7663	33.661	27.8534	28.608	37.9901	34.8568	33.9297	44.4317	0.00868784	0.173658	s
4.13_355.1982m/z	355.198	4.13148	neg	2M-H	C8H18O2S	-0.0670367	86.5464	100 - 9.74 - 5.35 - 0.455	HMDB0041608	Methional diethyl acetal	Organic compounds	Organooxygen compounds	Ethers	18.1188	13.2775	24.5007	22.6692	12.294	24.7266	43.4864	30.8589	33.9697	26.77	15.0816	15.8932	81.002	38.0367	29.6453	85.3074	39.6349	31.0209	20.71	47.9545	32.2776	15.32	42.0633	35.9576	0.0146692	0.173329	s
4.82_485.3555m/z	485.355	4.82155	pos	M+H+Na	C63H94O6	9.9476	64.7944	100 - 69.4 - 25 - 6.19 - 1.18 - 0.185	HMDB0055659	TG(20:4(8Z,11Z,14Z,17Z)/18:4(6Z,9Z,12Z,15Z)/22:6(4Z,7Z,10Z,13Z,16Z,19Z))	Organic compounds	Lipids and lipid-like molecules	Glycerolipids	34.2375	34.3193	71.3964	43.0631	40.943	66.8029	91.6003	71.305	56.7872	86.607	100.309	99.9334	55.3068	62.7522	75.9731	88.9013	70.6408	114.997	59.2692	79.8193	96.5477	59.6368	77.5688	68.25	0.0107172	0.172958	s
2.91_887.5009m/z	887.501	2.91498	neg	M+FA-H	C44H74O15	-0.0760654	91.5186	100 - 49 - 14.8 - 3.35 - 0.617	HMDB0034624	Vinaginsenoside R1	Organic compounds	Lipids and lipid-like molecules	Prenol lipids	160.759	86.9039	128.653	148.768	69.2232	99.9249	3.39225	81.613	99.0097	9.33993	45.4149	25.9853	188.873	140.698	211.645	183.214	87.2528	216.877	32.8572	49.9916	32.8286	21.8673	14.8146	30.1372	4.23935e-06	0.17023	s
2.45_656.2650m/z	656.265	2.44567	neg	3M-H	C12H13NO3	5.48483	93.2556	100 - 13.6 - 1.47 - 0.117	HMDB0033436	Nigellimine N-oxide	Organic compounds	Organoheterocyclic compounds	Isoquinolines and derivatives	185.089	108.988	155.914	216.929	145.505	157.353	126.307	176.309	66.0914	73.8839	192.589	65.5393	158.436	190.283	242.1	240.127	206.452	315.9	134.528	161.273	164.727	142.971	178.703	196.251	0.00459669	0.168139	s
0.56_485.9958m/z	485.996	0.560567	neg	M-H	C11H16N5O11P3	-5.91864	86.4653	100 - 14.3 - 3.22 - 0.363	HMDB0061723	Carbovir Triphosphate	Organic compounds	Nucleosides, nucleotides, and analogues	Nucleoside and nucleotide analogues	8.22728	6.16097	10.3208	3.5457	16.1894	11.4918	45.5801	28.6839	41.1543	35.8908	34.6467	49.3992	12.3348	13.3986	9.94533	16.4396	23.8267	12.0112	34.5858	30.9663	28.5193	43.1821	45.4938	32.4494	3.02207e-08	0.165526	s
4.27_286.3110m/z	286.311	4.26652	pos	M+NH4	C18H36O	2.01388	84.0891	100 - 19.9 - 2.08 - 0.152	HMDB0029632	Oleyl alcohol	Organic compounds	Lipids and lipid-like molecules	Fatty Acyls	13.7043	26.7911	43.4245	13.7153	45.7804	41.496	40.062	25.7113	28.519	44.0719	13.5328	36.0885	46.1351	101.388	39.9884	51.5275	92.2751	39.805	48.1883	31.2799	51.5169	43.1818	29.2813	56.411	0.0194892	0.164775	s
3.24_334.2956m/z	334.296	3.23503	pos	2M+NH4	C9H18O2	1.3591	92.0378	100 - 10 - 0.86	HMDB0059822	Ethyl 5-methylhexanoate	Organic compounds	Lipids and lipid-like molecules	Fatty Acyls	21.3788	29.7872	29.6964	21.0241	44.8083	52.8979	51.9482	27.2908	36.0147	51.3731	47.4798	50.1756	62.7828	70.8728	45.2319	73.078	81.0133	55.526	52.3568	34.7814	48.712	52.019	34.6117	52.9417	0.00107992	0.164206	s
4.91_989.0203m/z	989.02	4.91367	neg	3M-H	C14H6N2O8	-9.7827	86.1334	100 - 16.2 - 2.88 - 0.325	HMDB0013636	Pyrroloquinoline quinone	Organic compounds	Organoheterocyclic compounds	Quinolines and derivatives	58.6174	62.2311	71.0109	48.172	38.9889	49.4149	127.155	88.9986	93.3384	110.203	66.8664	74.3763	94.6147	115.58	72.9934	66.5389	93.9473	35.2063	98.444	107.128	89.8182	63.2958	75.2005	69.4526	0.0257962	0.160859	s
0.62_151.0252m/z	151.025	0.62485	neg	2M-H	C2H4O3	2.78447	98.3647	100 - 2.32 - 0.632	HMDB0000115	Glycolic acid	Organic compounds	Organic acids and derivatives	Hydroxy acids and derivatives	28.0979	54.3545	57.0314	32.6579	75.5656	82.9688	86.7668	66.7584	96.4867	96.8148	120.272	123.464	79.1453	73.3873	64.7816	108.134	151.662	77.1248	64.4056	71.8169	59.4024	110.603	104.707	83.5614	0.0315521	0.159695	s
3.60_830.4371m/z	830.437	3.59788	neg	3M-H	C11H23N3O3S	7.65159	91.2345	100 - 14.2 - 6.07 - 0.73	HMDB0028978	Methionyl-Lysine	Organic compounds	Organic acids and derivatives	Carboxylic acids and derivatives	10.9506	41.4272	39.3909	3.88964	41.4056	41.1257	65.6958	45.8962	58.6694	47.4561	33.385	48.7141	51.7031	64.4468	34.6031	38.4569	62.547	29.4697	58.1497	49.5012	42.0096	53.3759	44.8252	45.2585	0.0465151	0.159363	s
4.66_547.2751m/z	547.275	4.65793	neg	M-H2O-H	C28H38N8O5	-6.28626	78.902	100 - 33.8 - 6.58 - 0.937 - 0.107	HMDB0030461	Hordatine A	Organic compounds	Phenylpropanoids and polyketides	2-arylbenzofuran flavonoids	32.7714	93.5916	117.315	22.65	87.6967	89.7318	135.793	100.012	103.819	85.3104	75.2844	67.087	137.901	195.92	119.583	114.654	160.847	113.04	109.02	97.9703	107.126	76.4697	51.1142	84.9756	0.00606259	0.157926	s
4.09_437.3125m/z	437.312	4.08865	pos	2M+Na	C13H21NO	-3.30692	95.8815	100 - 14.7 - 1.21	HMDB0060611	N-Desmethyl tapentadol	Organic compounds	Benzenoids	Benzene and substituted derivatives	45.4208	97.3092	143.283	51.5747	128.036	148.94	196.839	151.927	153.436	207.105	184.913	169.957	119.962	103.28	44.6051	119.991	85.4526	39.8564	172.525	133.184	211.963	167.697	124.952	187.146	0.000289316	0.15792	s
0.63_212.9534m/z	212.953	0.632	neg	M+FA-H	C3H6NO2Se	-6.85756	0.581735	1.79 - 0 - 18.9 - 16.1 - 48.5 - 1.87 - 100 - 3.75 - 18 - 0.675	HMDB0003288	Selenocysteine	Organic compounds	Organic acids and derivatives	Carboxylic acids and derivatives	89.7971	169.78	160.266	102.794	211.256	208.963	129.065	85.3223	103.917	169.873	163.209	177.713	171.409	225.299	155.079	222.162	344.656	210.756	127.346	141.815	162.839	160.291	185.896	206.228	0.0412424	0.15711	s
0.82_173.1063n	215.14	0.82415	pos	M+ACN+H, 2M+H	C8H15NO3	6.35072	92.2047	100 - 9.3 - 1	HMDB0000701	Hexanoylglycine	Organic compounds	Organic acids and derivatives	Carboxylic acids and derivatives	48.2765	25.5699	31.2972	44.5116	25.6069	23.2016	27.564	29.8744	29.9453	10.737	30.021	23.2842	36.0299	26.9936	30.9821	28.9452	9.54805	26.7138	9.63573	22.9384	20.8513	4.51198	22.601	23.5546	0.0486998	0.156375	s
0.55_246.1444m/z	246.144	0.546283	neg	M-H	C10H21N3O4	-6.22352	92.6725	100 - 12.3 - 1.52 - 0.125	HMDB0029066	Threoninyl-Lysine	Organic compounds	Organic acids and derivatives	Carboxylic acids and derivatives	42.9254	21.6894	29.7433	43.5842	23.9721	29.4711	10.1008	20.9297	16.3308	6.04211	26.5262	24.6649	24.1895	5.29496	39.3793	37.781	18.5583	35.3933	9.59515	20.9305	9.53918	10.958	18.5558	5.8267	0.00922383	0.155355	s
2.55_559.2861m/z	559.286	2.55212	neg	M+FA-H	C30H42O7	-9.99049	73.9147	100 - 33.2 - 6.77 - 1.03 - 0.127	HMDB0039649	Ganoderic acid V1	Organic compounds	Lipids and lipid-like molecules	Prenol lipids	1477.86	1360	1004.1	1827.86	1486.46	1008.39	198.094	776.796	858.609	134.674	833.546	918.268	1843.68	1414.34	2236.51	2074.68	1585.69	2725.1	584.269	1002.09	711.948	640.226	986.902	763.512	4.47957e-06	0.154438	s
2.82_367.0624m/z	367.062	2.81568	neg	M+Cl	C20H14NO4+	2.20816	83.3884	100 - 22.3 - 3.19 - 0.343	HMDB0029367	Sanguinarine	Organic compounds	Alkaloids and derivatives	Benzophenanthridine alkaloids	87.5584	72.5807	94.021	116.367	92.2839	97.1618	66.4793	95.0084	72.722	73.4924	106.272	63.1092	81.4396	103.138	109.426	82.019	81.9559	118.392	60.2327	70.9721	71.8342	77.6385	78.9799	57.253	0.0160064	0.154362	s
4.17_408.2501m/z	408.25	4.1672	neg	M+FA-H	C20H33N3O3	-0.705694	79.3972	100 - 23.2 - 3.19 - 0.325	HMDB0042020	Talinolol	Organic compounds	Benzenoids	Benzene and substituted derivatives	22.7565	61.2419	63.6309	17.3405	60.5439	63.6364	80.6936	54.1833	62.9572	70.897	49.6554	71.7861	69.7924	91.2131	53.6668	77.6907	84.6945	76.0578	68.0524	62.3871	68.2446	52.464	72.0489	53.0897	0.0326864	0.154104	s
4.58_521.2590m/z	521.259	4.57937	neg	3M-H	C8H14O4	-2.64234	90.791	100 - 8.97 - 1.18	HMDB0060684	2-Propylglutaric acid	Organic compounds	Lipids and lipid-like molecules	Fatty Acyls	65.8589	169.711	165.929	56.609	153.217	165.948	198.016	144.453	150.844	174.1	147.189	120.779	179.836	264.781	163.043	183.538	213.736	171.204	158.646	154.819	158.554	132.188	119.249	152.097	0.0299898	0.15322	s
3.24_277.0072m/z	277.007	3.24215	neg	M-H	C6H14O8S2	5.23445	83.1069	100 - 8.56 - 11 - 0.848 - 0.436	HMDB0042046	Treosulfan	Organic compounds	Organic acids and derivatives	Organic sulfonic acids and derivatives	67.9041	75.1163	77.6064	65.9064	73.2182	78.3711	81.9467	66.9226	67.7816	98.4028	88.582	70.7252	91.8928	107.903	82.3758	93.3879	112.293	104.073	73.8671	74.1436	70.1637	89.235	98.7818	93.0618	0.00363961	0.149285	s
4.49_634.3321m/z	634.332	4.48722	neg	M+Na-2H	C36H47N5O4	-8.82732	84.8379	100 - 41.5 - 9.2 - 1.44 - 0.177	HMDB0014369	Indinavir	Organic compounds	Organic acids and derivatives	Carboxylic acids and derivatives	264.001	468.346	532.15	300.495	460.035	565.569	305.499	271.528	267.852	315.855	253.94	287.04	547.901	659.536	664.481	517.168	601.653	686.449	296.718	278.572	239.965	259.491	262.009	250.157	1.31887e-07	0.149148	s
0.55_224.0508m/z	224.051	0.546283	neg	M+Cl	C8H15NO2S	-4.80228	84.574	100 - 10.1 - 5.39 - 0.472	HMDB0012286	S-Prenyl-L-cysteine	Organic compounds	Organic acids and derivatives	Carboxylic acids and derivatives	6.36343	17.1534	17.3713	7.74026	16.8513	23.2465	23.4228	9.86587	15.4426	16.2304	17.4663	24.6797	16.7844	20.5751	16.6447	34.617	29.1701	20.3016	19.1897	22.858	23.6168	29.8975	21.326	27.2696	0.0431827	0.148888	s
2.18_542.1750m/z	542.175	2.17565	neg	3M-H	C6H7N5O2	4.24863	94.1882	100 - 8.47 - 0.731	HMDB0006037	8-Hydroxy-7-methylguanine	Organic compounds	Organoheterocyclic compounds	Imidazopyrimidines	60.5669	43.4786	56.5646	64.7315	56.5354	60.9873	34.4679	45.7175	14.2653	46.6081	63.3737	5.10616	60.2483	37.2433	68.118	68.4277	35.8964	98.7839	46.6643	59.4792	69.85	50.9046	84.2642	97.6953	0.0383899	0.1466	s
0.57_231.0616m/z	231.062	0.5677	neg	M+FA-H	C7H10N2O4	-3.32188	91.1445	100 - 8.57 - 1.15	HMDB0061890	Pyroglutamylglycine	Organic compounds	Organic acids and derivatives	Carboxylic acids and derivatives	12.4032	17.7267	18.6732	16.5649	21.5935	23.611	28.3088	16.4256	18.8301	23.8388	25.1915	26.3249	18.6993	20.7092	24.3344	30.3769	36.3399	22.6835	23.241	24.8005	29.7523	29.7922	27.4344	30.8084	0.0188488	0.143741	s
4.26_398.4358m/z	398.436	4.25938	pos	M+NH4	C26H52O	0.291124	79.79	100 - 28.8 - 4.19 - 0.413	HMDB0029695	Hexacosanal	Organic compounds	Lipids and lipid-like molecules	Fatty Acyls	8.98461	23.6538	23.7689	12.5269	25.6532	29.0795	36.1759	31.3797	35.1299	34.0825	29.5067	31.9887	39.2763	49.1514	14.1052	45.0635	35.8479	40.7686	38.6415	24.9607	39.4247	34.5899	25.3021	29.1	0.0124611	0.139819	s
2.37_285.1434m/z	285.143	2.37423	neg	M+FA-H	C12H20N2O3	-8.97366	86.4234	100 - 14.1 - 1.53 - 0.123	HMDB0015407	Pirbuterol	Organic compounds	Organoheterocyclic compounds	Pyridines and derivatives	23.104	20.6644	23.4668	30.3617	24.3966	26.281	16.4438	22.6978	19.6561	10.6842	27.5429	16.1218	20.58	16.2157	27.3713	26.3869	9.30151	33.0948	10.6897	17.4331	12.4646	10.2544	15.8291	7.516	0.00830305	0.138794	s
4.47_394.3292m/z	394.329	4.46582	pos	M+NH4	C24H40O3	-6.3795	78.6129	100 - 26.5 - 4 - 0.438	HMDB0002492	7a-Hydroxy-5b-cholanic acid	Organic compounds	Lipids and lipid-like molecules	Steroids and steroid derivatives	25.1919	11.6396	17.7198	22.6395	17.3642	13.2024	76.5575	44.6076	23.0423	82.8436	39.3715	24.6237	10.904	18.1938	0	24.3524	6.90447	3.89227	17.9875	15.9741	10.2957	6.70202	16.653	6.76474	0.00042745	0.134763	s
8.83_741.5290n	740.52	8.83318	neg	M-H2O-H, M-H	C41H76NO8P	-2.49052	87.5054	100 - 45.9 - 11.9 - 2.26 - 0.341	HMDB0009092	PE(18:2(9Z,12Z)/18:1(9Z))	Organic compounds	Lipids and lipid-like molecules	Glycerophospholipids	60.8107	39.7249	39.7787	37.9999	18.1461	24.9719	61.9216	31.1832	49.1456	11.9289	3.02191	46.6406	386.631	109.723	27.3945	408.78	72.8508	8.65364	30.9415	25.2485	18.5295	53.2195	16.2317	11.2309	0.0395613	0.132448	s
1.22_412.2175m/z	412.218	1.22203	neg	M+Cl	C24H31N3O	3.68327	75.9639	100 - 27.4 - 3.83 - 0.363	HMDB0041891	Famprofazone	Organic compounds	Organoheterocyclic compounds	Azoles	50.2784	17.5089	22.261	52.3355	32.7217	22.5404	13.9172	26.4436	7.44703	2.16527	44.4126	10.4701	31.1312	15.9475	46.6178	23.3112	24.9164	49.707	7.55669	16.0542	9.23435	2.96087	29.3231	13.7077	0.0412402	0.131742	s
2.67_615.4044m/z	615.404	2.6664	neg	M-H	C33H61O8P	2.09643	88.2483	100 - 36.7 - 8.18 - 1.36 - 0.182	HMDB0115775	PA(i-12:0/18:2(9Z,11Z))	Organic compounds	Lipids and lipid-like molecules	Glycerophospholipids	154.804	254.582	260.204	194.504	283.813	238.128	242.218	275.629	295.716	266.506	265.738	310.325	316.239	309.592	226.641	299.007	340.461	285.375	255.528	261.296	225.809	227.346	290.679	233.039	0.0222172	0.131393	s
8.80_757.5632n	758.57	8.80468	pos	M+H, M+Na, M+K, M+CH3OH+H, M+H-H2O	C42H80NO8P	1.32432	94.1949	100 - 47 - 12.5 - 2.39 - 0.367	HMDB0008328	PC(20:2(11Z,14Z)/14:0)	Organic compounds	Lipids and lipid-like molecules	Glycerophospholipids	395.696	842.223	871.721	182.463	825.746	923.468	445.364	134.919	489.378	261.471	134.602	454.676	1530.34	1975.08	476.78	1837.98	1979.14	448.339	356.843	240.667	134.552	333.885	135.656	120.204	0.000318061	0.130041	s
2.54_236.0915m/z	236.092	2.53782	neg	M+Na-2H	C10H17NO4	5.0525	89.6892	100 - 11.5 - 1.43 - 0.114	HMDB0094779	7-hydroxyoct-7-enoylglycine	Organic compounds	Organic acids and derivatives	Carboxylic acids and derivatives	12.0889	23.9168	26.7177	11.7858	23.6142	30.0494	33.4	16.0843	15.1134	28.4735	22.097	23.8602	25.3952	34.813	24.2418	37.1063	40.172	34.4493	27.6241	23.2893	28.4153	31.5231	26.0677	31.4017	0.0240266	0.126174	s
0.55_491.0443m/z	491.044	0.546283	neg	M-H2O-H	C21H18O15	-4.78217	80.3636	100 - 23.5 - 5.72 - 0.911 - 0.135	HMDB0125252	6-{[5,7-dihydroxy-4-oxo-2-(2,3,4,5-tetrahydroxyphenyl)-4H-chromen-3-yl]oxy}-3,4,5-trihydroxyoxane-2-carboxylic acid	Organic compounds	Phenylpropanoids and polyketides	Flavonoids	8.51868	10.4576	11.5636	3.22181	10.4704	11.8349	15.3449	5.88624	11.0919	11.1802	7.61728	15.5033	10.557	14.871	8.54199	19.167	23.419	14.2815	14.8704	15.167	12.9627	17.9098	16.4923	16.5142	0.0245866	0.126144	s
4.67_550.3491m/z	550.349	4.66508	neg	M+FA-H	C26H52NO6P	-4.64841	88.098	100 - 29.3 - 5.38 - 0.737	HMDB0010408	LysoPC(P-18:1(9Z))	Organic compounds	Lipids and lipid-like molecules	Glycerophospholipids	130.441	257.901	267.25	110.688	257.03	287.249	266.33	199.091	250.674	212.961	193.759	195.941	313.492	392.857	257.359	317.647	355.788	288.718	221.722	209.753	248.422	186.563	189.361	220.057	0.00258303	0.123849	s
4.48_501.2807n	546.28	4.48008	neg	M+Cl, M+FA-H	C25H44NO7P	-9.68139	93.8978	100 - 28.2 - 5.26 - 0.737	HMDB0011518	LysoPE(20:4(8Z,11Z,14Z,17Z)/0:0)	Organic compounds	Lipids and lipid-like molecules	Glycerophospholipids	184.259	412.885	459.871	198.111	399.851	526.546	452.822	357.017	347.727	440.8	318.996	339.762	473.793	544.308	455.006	449.922	488.613	495.955	424.086	373.359	334.775	368.798	359.859	304.57	0.0427772	0.123372	s
4.49_321.2090m/z	321.209	4.49437	neg	2M+FA-H	C9H14O	6.57838	98.9074	100 - 9.93 - 0.646	HMDB0036092	exo-2-Methyl-3-methylenebicyclo[2.2.1]heptan-2-ol	Organic compounds	Lipids and lipid-like molecules	Prenol lipids	163.995	80.6681	114.44	324.119	167.12	173.595	866.026	182.267	402.924	513.994	255.602	483.506	127.435	681.881	503.52	148.252	1093.52	745.325	88.4924	75.7166	110.364	69.7754	53.663	73.8584	0.00471102	0.122203	s
4.56_281.2471m/z	281.247	4.55793	neg	M-H2O-H	C18H36O3	-5.10352	87.6843	100 - 20 - 2.51 - 0.236	HMDB0112193	6-Hydroxyoctadecanoic acid	Organic compounds	Lipids and lipid-like molecules	Fatty Acyls	51.5345	72.6541	104.941	37.4419	105.825	104.646	106.967	58.8139	51.0727	59.4734	77.9267	28.3075	143.851	181.025	117.231	142.391	141.648	138.785	89.0012	84.6659	99.2457	43.768	41.7241	92.5209	0.000119288	0.11947	s
8.56_757.5631n	758.57	8.55538	pos	M+H, M+K, M+Na	C42H80NO8P	1.30535	93.6813	100 - 47 - 12.5 - 2.39 - 0.367	HMDB0008133	PC(18:2(9Z,12Z)/16:0)	Organic compounds	Lipids and lipid-like molecules	Glycerophospholipids	758.919	2069.17	2182	202.409	2658.18	2222.56	341.512	60.1983	420.055	75.2608	8.74282	171.98	4204.07	7034.13	1016.22	5051.06	8938.08	867.274	311.317	42.1779	16.2468	237.535	13.2801	29.1836	0.000564865	0.119036	s
0.77_151.0254m/z	151.025	0.767	neg	M+FA-H	C3H6O4	5.21635	97.1753	100 - 3.47 - 0.864	HMDB0031818	D-2,3-Dihydroxypropanoic acid	Organic compounds	Organic oxygen compounds	Organooxygen compounds	68.3938	124.928	135.071	80.4014	175.722	201.963	166.893	158.167	151.532	213.578	240.375	202.92	142.767	193.303	139.728	226.651	257.516	208.752	130.975	131.229	131.023	162.246	185.182	177.432	0.0441665	0.117811	s
8.51_802.5583m/z	802.558	8.50602	neg	M+FA-H	C42H80NO8P	-2.65802	93.9943	100 - 47 - 12.5 - 2.39 - 0.367	HMDB0114241	PE-NMe2(20:2(11Z,14Z)/15:0)	Organic compounds	Lipids and lipid-like molecules	Glycerophospholipids	368.791	2196.94	1812.43	207.485	1696.45	1607.04	311.35	64.1844	361.068	99.7689	34.0882	182.06	3511.33	6550.22	893.348	2796.19	5858.39	634.221	406.693	124.565	82.662	246.36	56.1255	39.1648	0.000994016	0.116188	s
1.36_223.1097m/z	223.11	1.3642	pos	M+K	C11H20O2	1.23126	88.6839	100 - 12.2 - 1.09	HMDB0040593	2-Propenyl octanoate	Organic compounds	Lipids and lipid-like molecules	Fatty Acyls	82.8151	77.0568	97.3076	120.511	106.901	120.176	93.1789	95.2053	90.6454	95.857	106.081	99.7887	102.287	106.616	190.024	118.133	98.7308	132.7	78.5519	103.927	88.1864	63.064	59.4354	56.0526	0.00760696	0.113969	s
4.29_350.2332m/z	350.233	4.28795	pos	2M+NH4	C10H14O2	1.86597	91.2443	100 - 11.1 - 0.963	HMDB0135742	3-(4-methoxyphenyl)propan-1-ol	Organic compounds	Benzenoids	Phenol ethers	17.3058	22.0882	29.0587	7.14035	30.0461	15.7515	62.6952	47.5322	42.2547	61.3549	47.9915	53.9878	21.2359	35.3446	9.87234	10.5874	9.17761	24.5639	53.5488	52.3129	40.7404	49.4176	53.4472	27.3495	2.56774e-06	0.113685	s
0.62_199.1217n	232.155	0.62485	pos	M+ACN+H, M+CH3OH+H	C10H17NO3	4.31304	89.3331	100 - 11.5 - 1.22	HMDB0031820	Neotussilagine	Organic compounds	Organoheterocyclic compounds	Pyrrolizidines	40.4374	73.5214	81.2667	51.7344	121.272	119.126	72.5793	45.2823	60.6552	75.4635	67.6333	64.4261	117.529	135.866	223.301	124.06	150.588	80.4571	84.9941	81.5794	77.5913	115.492	46.6217	69.6884	0.00324559	0.109075	s
1.29_333.0391m/z	333.039	1.29347	neg	M+Cl	C13H14O8	2.76952	90.4026	100 - 14.5 - 2.62 - 0.279	HMDB0125176	6-(benzoyloxy)-3,4,5-trihydroxyoxane-2-carboxylic acid	Organic compounds	Organic oxygen compounds	Organooxygen compounds	88.7952	115.302	106.704	88.6789	136.781	127.69	115.032	128.612	119.996	118.653	141.924	118.226	130.487	144.382	122.165	150.217	146.082	157.803	90.1733	114.055	111.426	130.231	127.336	131.066	0.0120085	0.1046	s
2.39_830.5915m/z	830.592	2.38855	pos	2M+Na	C12H7Br3O	-8.79943	9.35302	34.2 - 4.47 - 100 - 13.1 - 97.9 - 12.8 - 32.4 - 4.17 - 0.314	HMDB0037545	2,4-Dibromo-1-(4-bromophenoxy)benzene	Organic compounds	Benzenoids	Benzene and substituted derivatives	46.7444	150.137	231.646	63.3744	223.34	265.645	258.045	167.214	292.705	304.416	187.208	292.803	353.606	295.166	176.201	322.855	402.218	198.88	293.331	217.461	120.05	138.382	188.039	119.406	0.0327958	0.103416	s
0.99_286.0890m/z	286.089	0.987717	neg	M+Na-2H	C10H19NO7	-6.73656	87.7861	100 - 11.7 - 2.06 - 0.187	HMDB0038663	D-1-[(3-Carboxypropyl)amino]-1-deoxyfructose				27.4549	45.6758	42.8241	24.1057	54.6208	61.5344	73.5394	53.8941	50.2674	75.232	79.6312	61.2667	37.743	54.6822	33.85	51.1343	65.1071	46.6578	56.6717	50.5458	49.2896	68.6009	76.2391	59.9853	0.0153651	0.101328	s
3.21_202.2175m/z	202.218	3.20645	pos	M+NH4	C12H24O	5.25554	88.3428	100 - 13.3 - 1.02	HMDB0033933	Lauric aldehyde	Organic compounds	Organic oxygen compounds	Organooxygen compounds	11.7576	16.0136	19.6174	16.2798	30.6448	25.9071	36.1426	32.663	31.8678	21.5887	24.9074	37.8832	19.7213	32.3658	32.4853	34.5573	36.8242	24.533	32.0136	26.4676	23.2587	30.712	20.3379	36.6287	0.034481	0.101233	s
4.57_284.2219m/z	284.222	4.56508	neg	M-H	C16H31NO3	-4.33441	96.3605	100 - 18.1 - 2.17 - 0.195	HMDB0013250	Myristoylglycine	Organic compounds	Organic acids and derivatives	Carboxylic acids and derivatives	44.839	54.6905	42.0704	40.0042	54.9134	50.4644	77.3614	74.8547	77.0822	80.3001	83.7164	66.8582	60.9676	79.3643	49.7122	51.9368	68.082	63.5456	75.0901	75.9426	65.6399	58.4106	58.8741	54.7406	8.86541e-05	0.101224	s
4.57_610.3702m/z	610.37	4.56508	neg	M+Cl	C30H58NO7P	9.83578	78.4054	100 - 33.7 - 6.96 - 1.07 - 0.133	HMDB0010400	LysoPC(22:2(13Z,16Z))	Organic compounds	Lipids and lipid-like molecules	Glycerophospholipids	33.4272	67.4823	72.4613	27.3277	56.832	60.4435	53.6909	37.9261	29.8833	27.292	19.2441	6.75538	104.645	163.474	92.9745	80.4942	88.621	84.4692	52.9884	52.057	65.8628	23.3377	28.6259	54.6979	6.28299e-05	0.0998936	s
0.81_250.0631n	268.105	0.809867	pos	M+H-H2O, M+NH4	C8H14N2O5S	2.83083	92.8917	100 - 10.5 - 6.05 - 0.562	HMDB0001049	gamma-Glutamylcysteine	Organic compounds	Organic acids and derivatives	Carboxylic acids and derivatives	53.0195	80.1305	71.9552	54.1205	74.589	49.6484	83.9647	73.477	118.919	30.7395	57.3926	72.1291	123.081	93.1385	277.847	67.3177	88.4671	147.903	43.0237	72.62	103.219	35.0992	57.7532	72.834	0.0326305	0.0981238	s
5.33_760.5779m/z	760.578	5.33373	pos	M+CH3OH+H	C41H78NO7P	-9.929	74.0237	100 - 45.9 - 11.7 - 2.16 - 0.317	HMDB0011441	PE(P-18:1(9Z)/18:1(9Z))	Organic compounds	Lipids and lipid-like molecules	Glycerophospholipids	74.1545	51.658	90.3246	50.9638	29.3248	72.0229	104.416	55.9403	49.1257	86.5066	55.816	39.7758	142.051	89.0655	115.573	161.244	88.7259	133.811	50.8581	26.3347	93.0558	42.9159	31.052	96.0047	0.00125236	0.0940697	s
4.91_605.4238m/z	605.424	4.90657	pos	2M+H	C17H26N4O	-7.88882	88.1711	100 - 20.2 - 2.14 - 0.159	HMDB0015216	Emedastine	Organic compounds	Organoheterocyclic compounds	Benzimidazoles	29.3903	24.8162	36.8068	22.9911	13.2188	29.7328	59.5128	43.2423	77.4662	71.4114	28.1939	106.297	33.6707	32.9883	33.786	44.0526	24.2603	38.022	23.6991	30.2336	61.0234	57.9669	35.1389	74.2185	0.00774463	0.0936527	s
2.08_534.1838m/z	534.184	2.07565	neg	M+Na-2H	C21H31N5O10	3.90878	87.4096	100 - 25.3 - 5.12 - 0.757	HMDB0032880	trans-Zeatin-O-glucoside riboside	Organic compounds	Nucleosides, nucleotides, and analogues	Purine nucleosides	438.046	281.393	325.38	441.16	285.439	394.713	128.306	263.959	178.468	139.387	354.855	233.549	331.56	308.408	483.923	430.129	327.961	597.065	202.462	283.748	215.627	226.83	393.101	265.899	0.00346297	0.0932409	s
2.35_275.1024m/z	275.102	2.35352	neg	M+Na-2H	C12H18N2O4	4.35269	89.2816	100 - 14.1 - 1.74 - 0.152	HMDB0029443	L-Pyridosine	Organic compounds	Organic acids and derivatives	Carboxylic acids and derivatives	85.0799	82.3502	85.8757	92.8118	98.2595	101.594	73.7911	101.448	70.4822	87.9473	112.226	83.6484	88.5444	82.057	103.429	113.53	90.7347	137.32	55.1972	75.9987	72.0937	69.9045	95.8614	76.6353	0.032293	0.0922127	s
1.98_465.2351m/z	465.235	1.98352	pos	M+CH3OH+H	C23H30NO7+	-1.50444	93.7188	100 - 25.9 - 4.65 - 0.625	HMDB0060897	Diphenhydramine N-glucuronide	Organic compounds	Organic oxygen compounds	Organooxygen compounds	186.424	103.723	114	216.33	136.195	160.197	27.5936	85.3301	47.2087	42.8431	85.0268	58.6497	148.335	112.323	262.368	124.896	113.192	256.31	81.6621	134.037	83.2702	70.6716	107.792	100.675	0.00106708	0.0877955	s
2.50_571.3812m/z	571.381	2.49567	neg	2M-H	C19H26O2	3.34691	84.1654	100 - 20.9 - 2.49 - 0.216	HMDB0062415	androst-5-ene-3,17-dione	Organic compounds	Lipids and lipid-like molecules	Steroids and steroid derivatives	104.943	353.158	469.151	24.9904	306.843	387.644	153.241	237.64	105.593	52.0853	259.564	73.4336	361.75	245.599	560.944	457.836	149.683	563.693	259.515	259.906	263.972	164.766	199.108	162.335	0.0287318	0.0872411	s
8.46_776.5428m/z	776.543	8.45602	neg	M-H	C41H80NO10P	-2.42125	94.2227	100 - 46 - 12.4 - 2.46 - 0.394	HMDB0112327	PS(15:0/20:0)	Organic compounds	Lipids and lipid-like molecules	Glycerophospholipids	520.262	2511.54	2008.88	320.274	1848.17	1573.49	1164.95	538.521	1239.62	751.2	251.303	843.016	3797.61	6534.02	983.987	2724.83	5427.17	697.66	1300.48	742.517	668.781	1000.92	503.283	355.599	0.00660044	0.085284	s
0.64_453.0131m/z	453.013	0.639133	neg	2M+FA-H	C7H8O5S	-8.83882	92.764	100 - 8.65 - 5.88 - 0.451	HMDB0060013	O-methoxycatechol-O-sulphate	Organic compounds	Organic acids and derivatives	Organic sulfuric acids and derivatives	35.8229	60.5463	82.6501	21.456	75.2982	63.028	71.8613	90.1118	106.355	88.2087	80.9269	133.734	74.7748	107.119	59.7054	81.4818	124.156	82.0126	90.2176	80.0886	37.7029	87.413	79.1714	56.2114	0.0314916	0.085186	s
8.83_261.1372m/z	261.137	8.82612	pos	M+H-2H2O	C15H22NO5+	4.15076	83.567	100 - 17 - 2.39 - 0.243	HMDB0136315	(2-{[3-(3,4-dihydroxy-5-methoxyphenyl)prop-2-enoyl]oxy}ethyl)trimethylazanium	Organic compounds	Phenylpropanoids and polyketides	Cinnamic acids and derivatives	54.166	90.9189	124.576	49.6837	122.915	155.752	162.433	114.468	108.561	126.541	141.641	143.856	136.742	126.809	137.899	115.983	109.312	120.563	104.024	93.2237	104.808	103.966	45.3238	82.3441	0.0323787	0.0797405	s
4.69_552.3649m/z	552.365	4.68652	neg	M+FA-H	C26H54NO6P	-4.20619	77.5153	100 - 29.3 - 5.38 - 0.738	HMDB0013122	LysoPC(P-18:0)	Organic compounds	Lipids and lipid-like molecules	Glycerophospholipids	331.416	734.258	836.627	294.496	731.595	822.427	456.207	297.867	282.552	413.973	304.805	232.623	867.182	1102.76	776.483	912.319	1046.15	850.227	366.967	353.537	451.294	317.459	334.923	468.968	2.72802e-06	0.0776843	s
2.21_512.2309m/z	512.231	2.21067	neg	M-H2O-H	C28H37NO9	3.6153	91.0628	100 - 31.4 - 6.62 - 1.05 - 0.136	HMDB0030317	Petasinoside	Organic compounds	Organooxygen compounds	Carbohydrates and carbohydrate conjugates	213.579	177.931	192.844	214.105	188.342	215.021	80.1828	161.823	115.739	68.2388	164.198	156.541	237.812	196.077	281.555	250.614	200.822	329.555	111.419	154.931	118.177	124.447	213.795	122.261	6.8682e-05	0.0682898	s
4.56_339.2906m/z	339.291	4.55797	pos	M+CH3OH+H	C20H34O2	4.1149	86.4049	100 - 22.1 - 2.74 - 0.246	HMDB0060039	11,14,17-Eicosatrienoic acid	Organic compounds	Lipids and lipid-like molecules	Fatty Acyls	19.1564	38.8598	43.6647	10.7392	50.1813	51.3111	32.9269	27.6136	22.4027	34.1372	26.7686	27.1503	57.9903	86.5286	16.8667	66.3631	72.5435	47.3089	36.9173	29.5812	33.8753	42.8227	18.5153	44.4242	0.0199491	0.0677594	s
2.50_442.2300m/z	442.23	2.49568	pos	M+H-2H2O	C26H29F2N7	-2.98896	73.4683	100 - 31 - 4.65 - 0.45	HMDB0015499	Almitrine	Organic compounds	Benzenoids	Benzene and substituted derivatives	66.4662	61.1301	80.5235	67.7242	132.512	114.365	49.551	68.2919	47.5385	27.443	95.3907	37.2413	110.979	78.7475	83.6024	110.482	67.9289	145.15	86.1068	85.9857	47.1838	35.9114	81.4536	32.586	0.0283739	0.0634678	s
2.25_425.2359m/z	425.236	2.25353	pos	M+H+Na	C40H76O13P2	-1.07075	62.9785	100 - 44.6 - 12.4 - 2.57 - 0.435	HMDB0013547	PGP(18:2(9Z,12Z)/16:0)	Organic compounds	Lipids and lipid-like molecules	Glycerophospholipids	257.393	147.443	176.201	387.495	231.512	214.92	57.737	159.338	200.167	54.4254	209.261	249.868	268.98	391.71	448.452	279.771	402.168	471.324	156.326	227.714	158.992	145.919	247.734	174.165	0.000275552	0.0615634	s
0.82_566.0531n	565.046	0.82415	neg	M-H, M+Na-2H	C15H24N2O17P2	-3.41019	90.7866	100 - 17.9 - 5 - 0.703 - 0.113	HMDB0062573	UDP-D-galactose(2-)	Organic compounds	Nucleosides, nucleotides, and analogues	Pyrimidine nucleotides	2117.16	4012.38	4141.95	2119.32	5196.84	5581.18	2388.88	1625.27	2071.39	2999.56	2576.77	2999.29	3581.46	4980.93	3391.75	5401.08	6978.85	4816.04	2821.14	2457.54	2345.63	3951.03	3618.34	3335.99	0.0057797	0.0609465	s
2.52_413.2172m/z	413.217	2.52425	neg	2M-H	C8H17NO5	7.66961	63.1398	100 - 9.4 - 1.42 - 0.106	HMDB0014634	Miglitol	Organic compounds	Organoheterocyclic compounds	Piperidines	151.753	153.046	178.026	162.908	171.882	217.225	135.428	187.19	126.139	123.896	228.13	146.25	181.006	147.839	282.672	255.904	182	350.346	117.336	140.92	121.508	136.011	170.447	106.509	0.00877107	0.060875	s
0.82_267.0747m/z	267.075	0.817	neg	M-H	C10H12N4O5	4.65512	93.2857	100 - 12.6 - 1.76 - 0.155	HMDB0003040	Arabinosylhypoxanthine	Organic compounds	Nucleosides, nucleotides, and analogues	Purine nucleosides	130.295	90.1742	88.7032	143.674	102.473	107.804	29.7436	51.2773	50.3123	48.4275	90.8794	58.0422	95.8352	94.4657	149.315	112.325	143.061	214.878	42.564	89.26	117.8	56.354	99.0093	163.656	0.00595821	0.0582998	s
2.20_468.2442m/z	468.244	2.20353	pos	M+2H	C45H74O20	-3.78196	64.3913	100 - 50.3 - 16.5 - 4.05 - 0.823 - 0.143	HMDB0031364	Ampeloside Bs1	Organic compounds	Lipids and lipid-like molecules	Steroids and steroid derivatives	373.882	358.08	508.554	463.712	583.481	754.989	194.38	439.389	319.175	221.769	582.918	391.379	656.385	474.082	718.372	571.697	449.536	1046.19	282.321	444.181	362.189	365.765	441.37	404.383	0.0128327	0.0565278	s
1.30_350.0280m/z	350.028	1.3006	neg	M+Na-2H	C10H12N5O6P	2.52807	93.0416	100 - 13 - 2.02 - 0.189	HMDB0011616	Adenosine 2',3'-cyclic phosphate	Organic compounds	Nucleosides, nucleotides, and analogues	Purine nucleotides	57.913	55.4652	65.3755	48.5462	57.2109	57.6556	52.361	55.3121	53.777	44.1709	65.7394	40.0974	76.1725	62.7034	64.2263	49.3862	81.0276	56.6841	56.5292	50.2939	61.1329	29.734	44.8824	45.5191	0.0344231	0.0556387	s
5.86_560.3891m/z	560.389	5.86022	pos	M+H-2H2O	C33H57NO8	-9.26031	84.9325	100 - 37 - 8.3 - 1.38 - 0.187	HMDB0034194	Jurubine	Organic compounds	Lipids and lipid-like molecules	Steroids and steroid derivatives	62.4346	47.7747	53.6477	51.9672	28.9417	15.7054	121.893	100.794	93.8001	87.244	70.0577	93.3452	31.0467	49.1641	50.1632	20.7245	41.3767	39.1102	74.0604	74.9404	81.8423	51.3503	57.8658	79.6009	5.69489e-06	0.0534363	s
4.06_518.2484m/z	518.248	4.06005	neg	3M-H	C11H11NO	6.72072	93.9335	100 - 12.4 - 0.913	HMDB0037113	1,2,5,6-Tetrahydro-4H-pyrrolo[3,2,1-ij]quinolin-4-one	Organic compounds	Organoheterocyclic compounds	Quinolines and derivatives	27.5051	68.8829	106.805	27.1948	61.1634	84.8285	68.4215	49.3179	52.1396	68.8233	53.5681	54.3315	88.9577	84.8652	79.6454	76.0544	66.6078	90.0592	62.4376	50.4875	47.9121	41.548	38.7638	41.7364	0.023407	0.0511438	s
3.42_429.0775m/z	429.077	3.42002	neg	M+Na-2H	C19H20O10	-6.97923	92.5756	100 - 21.2 - 4.18 - 0.569	HMDB0130057	3,4,5-trihydroxy-6-({3-[(1E)-4-hydroxybut-1-en-1-yl]-1-oxo-1H-isochromen-5-yl}oxy)oxane-2-carboxylic acid	Organic compounds	Organic oxygen compounds	Organooxygen compounds	216.916	268.172	276.842	233.087	304.978	337.549	250.175	291.826	252.429	221.273	299.866	324.502	369.741	404.192	372.557	390.261	471.157	417.196	222.968	279.468	214.961	240.131	285.401	212.532	2.1131e-06	0.0509451	s
4.58_572.2610m/z	572.261	4.57937	neg	3M-H	C6H13N3O4	-6.17957	91.4514	100 - 7.89 - 1.1	HMDB0029384	4-Hydroxycitrulline	Organic compounds	Organic acids and derivatives	Carboxylic acids and derivatives	181.361	461.927	467.096	146.64	419.562	436.336	433.289	350.92	327.595	333.111	256.015	272.063	538.591	776.53	481.237	494.18	646.024	522.429	337.813	340.566	302.365	243.039	233.199	262.63	0.000328318	0.0475457	s
0.62_162.1135m/z	162.114	0.617717	pos	M+NH4	C7H12O3	7.47961	93.235	100 - 7.82 - 0.882	HMDB0001988	4-Hydroxycyclohexylcarboxylic acid	Organic compounds	Organic oxygen compounds	Organooxygen compounds	183.169	332.47	393.208	260.193	507.969	610.376	245.888	168.049	212.123	308.904	235.633	261.703	547.865	622.299	688.404	599.744	703.239	500.477	257.724	237.516	316.963	312.53	242.138	293.182	4.03667e-06	0.0460227	s
2.45_334.0527m/z	334.053	2.45282	neg	M-H	C9H14N5O7P	-9.33365	97.381	100 - 12 - 2.1 - 0.194	HMDB0006824	Dihydroneopterin phosphate	Organic compounds	Organoheterocyclic compounds	Pteridines and derivatives	92.7131	82.6384	110.644	104.603	99.1445	130.809	104.169	95.9778	80.8484	71.3625	127.544	104.647	92.3745	130.358	117.094	138.498	160.592	174.65	88.6453	91.9975	81.7176	97.5163	122.26	96.6752	0.0118958	0.0437389	s
0.82_241.1553m/z	241.155	0.817017	pos	M+Na	C15H22O	-4.55653	86.656	100 - 16.5 - 1.48	HMDB0038195	Xanthorrhizol	Organic compounds	Lipids and lipid-like molecules	Prenol lipids	52.8208	60.2317	70.2482	36.9918	51.7335	75.5729	61.748	63.7702	48.4071	33.0367	40.9926	39.7484	96.7902	71.6087	110.191	48.7236	59.9206	89.1517	45.5134	38.1533	43.8918	37.591	43.8912	41.4437	0.00181582	0.0390131	s
7.45_729.5302n	774.527	7.45312	neg	M+Cl, M+FA-H	C40H76NO8P	-0.844799	94.6287	100 - 44.8 - 11.4 - 2.13 - 0.318	HMDB0113141	PE-NMe(18:1(9Z)/16:1(9Z))	Organic compounds	Lipids and lipid-like molecules	Glycerophospholipids	225.244	1727.16	1397.75	137.333	1406.32	1176.44	344.251	161.043	417.974	235.001	46.9468	317.626	2538.78	4598.4	706.625	2220.21	4116.62	592.451	475.169	235.614	237.436	359.763	205.698	93.5384	0.00113545	0.038297	s
3.44_337.0516m/z	337.052	3.44145	neg	M+Cl	C13H18O6S	-0.802625	84.1589	100 - 15.3 - 6.84 - 0.891 - 0.142	HMDB0132968	{[1-(4-methoxyphenyl)-4-methyl-3-oxopentan-2-yl]oxy}sulfonic acid	Organic compounds	Benzenoids	Phenol ethers	111.607	93.4279	65.64	138.432	104.871	56.7232	40.5887	75.7654	67.5771	35.1556	85.298	86.2062	104.314	126.586	148.533	112.182	134.117	159.566	56.1233	103.863	69.0277	57.3902	115.542	81.8114	0.00129969	0.0382662	s
2.43_641.2959m/z	641.296	2.43138	neg	M-H2O-H	C36H44N4O8	-3.36038	65.3769	100 - 41.2 - 9.92 - 1.76 - 0.251	HMDB0002158	Coproporphyrinogen I	Organic compounds	Organoheterocyclic compounds	Tetrapyrroles and derivatives	366.78	333.572	306.89	405.922	322.974	260.231	109.035	280.911	330.702	44.4902	313.03	297.175	490.79	405.786	615.542	823.86	430.828	750.129	198.803	219.918	168.588	188.306	178.462	193.42	1.53185e-05	0.0365192	s
8.47_716.5213m/z	716.521	8.4703	neg	M-2H	C79H152O17P2	4.59292	76.6873	100 - 87.8 - 41.6 - 14 - 3.69 - 0.816 - 0.156	HMDB0056970	CL(18:0/18:0/16:1(9Z)/18:0)	Organic compounds	Lipids and lipid-like molecules	Glycerophospholipids	321.071	674.049	603.647	218.821	370.473	416.029	594.423	426.682	484.647	322.835	282.133	336.032	930.777	1419.2	400.662	517.223	947.131	290.51	432.815	403.221	358.392	277.955	329.784	254.281	0.0357392	0.0322178	s
0.56_409.0939m/z	409.094	0.560567	neg	M+FA-H	C21H16O6	2.7452	83.1916	100 - 23.1 - 3.78 - 0.463	HMDB0033304	Gerberinol	Organic compounds	Phenylpropanoids and polyketides	Coumarins and derivatives	79.1838	96.0148	119.884	95.5697	122.987	128.562	75.3111	102.445	85.0499	113.522	125.095	133.384	115.353	104.934	109.095	130.839	157.645	180.525	74.0155	85.5177	66.2294	104.61	115.262	107.865	0.0465902	0.0315028	s
1.29_288.0588m/z	288.059	1.29347	neg	M+Cl	C13H16ClNO2	9.806	66.2876	100 - 14.7 - 33.4 - 4.8 - 0.457	HMDB0060550	6-Hydroxyketamine	Organic compounds	Benzenoids	Benzene and substituted derivatives	76.2678	57.3974	62.7327	60.5466	61.4335	60.8588	46.6664	62.2554	47.4273	73.2904	82.0656	34.996	74.2441	80.9753	81.4577	55.5912	87.4632	103.489	50.0055	69.0857	67.8714	34.7754	28.6486	70.7149	0.0335189	0.0309275	s
2.72_488.2298m/z	488.23	2.72285	pos	M+ACN+H	C24H30O8	4.27311	84.7361	100 - 26.6 - 5.04 - 0.714	HMDB0004483	Estrone glucuronide	Organic compounds	Lipids and lipid-like molecules	Steroids and steroid derivatives	99.6572	114.96	121.366	153.819	142.754	175.407	137.705	116.382	84.0704	143.963	131.673	94.2919	142.168	169.445	117.297	171.284	179.813	181.737	97.569	145.041	109.822	133.405	152.081	110.729	0.0410269	0.0263062	s
4.05_283.2872n	284.295	4.0458	pos	M+H, M+H-H2O	C18H37NO	-0.958513	87.9337	100 - 20.3 - 2.16 - 0.16	HMDB0034146	Octadecanamide	Organic compounds	Lipids and lipid-like molecules	Fatty Acyls	14.4827	38.4161	55.3086	14.6449	68.3978	73.0364	19.6961	10.9106	13.0747	20.306	10.8787	34.4287	109.483	151.267	56.1963	141.621	165.1	106.289	34.4319	8.9845	7.61286	9.39546	5.37754	14.2449	6.09099e-07	0.0192889	s
2.50_273.0901m/z	273.09	2.50282	neg	M-H2O-H	C14H16N2O5	6.84928	84.6846	100 - 16.2 - 2.26 - 0.225	HMDB0041309	(2S,4S)-Monatin	Organic compounds	Organic acids and derivatives	Carboxylic acids and derivatives	37.6476	33.459	42.0488	39.8228	36.6578	33.3651	33.4106	24.8098	28.476	19.6644	44.7503	29.3323	29.8796	33.97	44.7034	44.1391	42.706	61.5718	26.3165	32.3605	34.0994	21.4363	32.9082	41.7306	0.0448711	0.010737	s
4.98_694.4275m/z	694.427	4.97797	neg	M+Cl	C35H66NO8P	8.32199	82.2831	100 - 39.3 - 9.15 - 1.58 - 0.219	HMDB0116710	PE-NMe2(14:1(9Z)/14:1(9Z))	Organic compounds	Lipids and lipid-like molecules	Glycerophospholipids	8.79081	50.8727	105.112	7.42049	48.3242	85.7012	335.631	188.616	112.066	310.297	174.606	108.535	38.0277	26.2192	34.4894	29.9461	12.0018	14.2133	154.91	94.6887	99.1557	121.169	80.5058	93.7771	6.861e-05	0.0104893	s
2.61_694.4738m/z	694.474	2.60925	neg	M+Na-2H	C37H72NO7P	-8.15852	76.7046	100 - 41.5 - 9.82 - 1.7 - 0.235	HMDB0011369	PE(P-18:0/14:1(9Z))	Organic compounds	Lipids and lipid-like molecules	Glycerophospholipids	40.9332	89.9646	83.6374	54.9537	120.464	93.1857	87.8829	86.6843	100.333	92.0323	80.2119	98.5067	116.842	128.938	94.6541	99.063	130.258	86.2157	93.7074	92.397	67.905	70.2299	67.7052	66.7707	0.0281119	0.00880616	s
4.91_335.2950m/z	335.295	4.90657	pos	M+H	C22H38O2	1.69341	95.101	100 - 24.3 - 3.24 - 0.309	HMDB0002823	Docosatrienoic acid	Organic compounds	Lipids and lipid-like molecules	Fatty Acyls	112.759	33.1931	47.2762	149.707	22.8796	27.8614	329.17	93.1288	90.7878	394.061	116.543	115.426	29.0204	27.0137	27.8108	26.1969	12.1789	44.3799	59.6999	234.631	74.7102	56.6711	213.986	75.2063	0.0176201	0.00150364	s
2.47_480.1694m/z	480.169	2.4671	neg	M-H	C27H23N5O4	3.49359	80.0898	100 - 31.4 - 5.6 - 0.727	HMDB0015481	Pranlukast	Organic compounds	Organoheterocyclic compounds	Benzopyrans	63.1409	63.842	84.6014	81.2648	52.8667	65.4888	56.9415	51.7193	73.5298	9.37651	59.9577	51.908	60.1485	81.2325	101.344	66.9879	70.1188	85.4703	70.3307	67.2181	58.2229	57.4452	41.7443	61.4443	0.0359275	0.000929526	s
0.60_332.1456n	377.144	0.603417	neg	M+FA-H, 2M+FA-H, M-H	C16H20N4O4	-8.4807	86.7915	100 - 19.1 - 2.56 - 0.256	HMDB0029097	Tryptophyl-Gamma-glutamate	Organic compounds	Organic acids and derivatives	Carboxylic acids and derivatives	4265.18	4044.35	3770.75	4586.48	4483.47	5416.77	3864.27	2846.44	3026.35	3605.88	5795.71	4460.18	3544.07	2705.9	4604.28	4541.84	5626.16	5006.92	3071.79	3972.99	3398.2	3416.67	3887.03	3028.99	0.199909	0.981671
6.93_779.5474n	780.555	6.92672	pos	M+H, M+Na, M+K	C44H78NO8P	1.12081	75.3367	100 - 49.2 - 13.5 - 2.66 - 0.419	HMDB0008689	PC(22:5(7Z,10Z,13Z,16Z,19Z)/14:0)				799.018	624.534	318.432	931.432	168.635	218.928	1828.19	706.149	1906.3	1690.6	755.209	2191.1	4568.75	175.569	489.743	6229.74	87.918	297.463	1979.49	868.605	931.442	1975.82	918.303	1025.98	0.369603	0.919793
0.68_404.1027m/z	404.103	0.682	neg	3M-H	C4H9NO2S	9.44383	91.8732	100 - 5.67 - 5.06 - 0.245	HMDB0002108	Methylcysteine	Organic compounds	Organic acids and derivatives	Carboxylic acids and derivatives	4134.81	4502.46	4642.81	4275.19	4767.89	6232.94	5672.19	3111.67	2888.08	5406.16	6587.85	4173.44	3485.36	3627.18	5171.49	4754.8	7520.93	5596.39	4262.37	5736.22	6660.59	4820.95	5349.39	6727.82	0.549164	0.903563
0.60_377.0845m/z	377.085	0.603417	neg	M+Cl	C12H22O11	-3.18685	96.9924	100 - 13.7 - 3.12 - 0.341	HMDB0041627	beta-Lactose	Organic compounds	Organooxygen compounds	Carbohydrates and carbohydrate conjugates	92581.9	95473.9	93374.2	111646	117184	141689	100523	78154	79273.4	109301	150755	121760	91048.2	83425.4	114744	136010	169956	149719	84625.1	105880	93297.1	114950	131756	111134	0.581703	0.845624
0.96_164.0713m/z	164.071	0.95915	neg	M-H	C9H11NO2	-2.5634	97.3182	100 - 10.3 - 0.888	HMDB0059934	Benzyl glycinate	Organic compounds	Organic acids and derivatives	Carboxylic acids and derivatives	893.793	657.452	1053.84	1062.63	1325.82	1375.74	944.205	917.382	624.604	1569.2	1719.44	1710.22	720.958	1688.33	1173.21	1853.43	2148.01	1561.77	1020.89	1002.43	1038.85	1570.44	1848.58	1939.37	0.305951	0.696309
1.05_604.9025m/z	604.903	1.05132	neg	3M-H	Hg+2	-3.47465	0.115643	0.502 - 0 - 33.4 - 56.5 - 77.4 - 44.1 - 100 - 0 - 23	HMDB0003625	Mercury	Inorganic compounds	Homogeneous metal compounds	Homogeneous transition metal compounds	946.99	1542.13	1747.61	860.823	1616.4	1823.03	1887.79	1558.36	1371.51	1779.15	1630.42	1437.9	874.604	1481.31	1272.4	903.999	1490.7	1267.77	964.57	1294.73	1213.78	983.953	1500.08	1254.92	0.0678858	0.649906
1.63_229.1548m/z	229.155	1.6349	neg	M-H	C11H22N2O3	-4.29944	92.371	100 - 13 - 1.4 - 0.108	HMDB0029131	Valyl-Leucine	Organic compounds	Organic acids and derivatives	Carboxylic acids and derivatives	1377.03	195.17	158.721	1680.53	262.6	216.731	53.2877	161.45	254.68	73.9264	224.94	335.16	239.716	443.843	477.18	352.713	659.084	656.258	110.914	206.326	129.889	156.052	330.861	181.411	0.0979857	0.644109
2.69_386.2273m/z	386.227	2.68782	neg	3M-H	C6H11NO2	-6.15575	93.9956	100 - 7.06 - 0.624	HMDB0094697	1-Piperidine carboxylic acid	Organic compounds	Organoheterocyclic compounds	Piperidines	634.339	118.502	81.8688	895.031	137.731	71.2585	28.3621	107.945	185.866	24.028	77.2851	205.38	131.867	214.941	185.232	119.146	202.083	232.273	35.0332	83.2332	34.7758	45.0254	80.0662	31.9151	0.0879877	0.599744
8.80_702.5670n	703.574	8.80468	pos	M+H, M+Na, M+NH4	C39H79N2O6P	-0.779285	93.6475	100 - 44 - 10.7 - 1.87 - 0.258	HMDB0013464	SM(d18:0/16:1(9Z))	Organic compounds	Lipids and lipid-like molecules	Sphingolipids	1195.01	1101.53	1077.31	328.862	623.351	430.13	2393.37	960.477	1820.25	1347.34	695.467	1224.76	2506.59	2257.02	629.845	1930.14	1885.94	327.054	1826.21	1187.35	879.905	1299.95	744.01	743.727	0.153637	0.515409
2.47_627.4050m/z	627.405	2.4671	neg	M+FA-H	C40H54O3	-0.86863	82.9911	100 - 44 - 10.1 - 1.59 - 0.194	HMDB0037794	(3S,3'R,5R,6R)-7',8'-Didehydro-3,6-epoxy-5,6-dihydro-beta,beta-carotene-3',5-diol	Organic compounds	Lipids and lipid-like molecules	Prenol lipids	1274.88	1494	1586.66	1470.63	1660.93	1641.25	1597.07	1498.83	1582.57	1017.1	1615.61	1611.75	1291.98	1798.16	1493.98	1804.8	1831.59	1859.63	1938.42	1439.24	1545.86	1934.83	1360.75	1798.75	0.326056	0.495635
0.65_352.7804m/z	352.78	0.653417	neg	M-3H	C40H70N7O18P3S	-7.49297	60.4909	100 - 48.1 - 19.5 - 5.66 - 1.36 - 0.276	HMDB0060181	3-Oxopristanoyl-CoA	Organic compounds	Lipids and lipid-like molecules	Fatty Acyls	301.487	342.574	402.437	321.52	434.328	489.147	444.02	376.6	314.404	543.169	570.893	482.85	394.09	421.631	422.4	576.528	710.007	606.089	341.194	421.749	501.997	520.019	628.642	667.914	0.123642	0.492744
0.60_379.0822m/z	379.082	0.603417	neg	M+Na-2H	C19H18O7	6.45057	91.6716	100 - 21 - 3.54 - 0.434	HMDB0038805	Aflatoxin ExB2				32597.5	33637	33100.1	39111.7	41275	49552.3	35569.3	27571.3	27964.5	38386.4	52702.1	42686.7	32126.7	29608.8	40583.2	47450.1	59470.8	52465.1	29953.9	37303.4	33092.4	40243.8	45880.3	39008.6	0.567807	0.492005
0.91_442.0143m/z	442.014	0.90915	neg	M-H	C10H15N5O11P2	-6.22561	85.7358	100 - 13.2 - 3.07 - 0.329	HMDB0059648	8-oxo-dGDP	Organic compounds	Nucleosides, nucleotides, and analogues	Purine nucleotides	822.63	1322.91	1061.41	820.183	1668.25	1441.85	1125.23	1174.91	994.287	1389.25	1686.63	1355.33	1075.74	1392.22	1424.23	1483.08	1882.33	1849.47	903.653	1193.15	1276.83	1205.06	1731.64	1829.23	0.352137	0.467874
2.77_406.1930m/z	406.193	2.76568	neg	M-H2O-H	C24H28FN3O3	-1.37943	81.326	100 - 27.5 - 4.25 - 0.477	HMDB0061046	M2 di-hydroxylated metabolite	Organic compounds	Organoheterocyclic compounds	Indoles and derivatives	594.848	151.504	79.5946	770.947	176.712	66.12	5.89117	85.8227	199.83	5.93109	105.653	179.417	184.711	303.095	262.412	129.015	308.555	289.641	53.1219	109.664	85.2463	49.4856	118.852	69.8234	0.0612909	0.462098
0.68_203.2239m/z	203.224	0.682	pos	M+H	C10H26N4	4.32922	95.5191	100 - 12.6 - 0.73	HMDB0001256	Spermine	Organic compounds	Organic nitrogen compounds	Organonitrogen compounds	2402.22	5550.41	7035.06	3427.43	8288.13	10753	7592.89	5290.12	4625.58	8931.93	6848.04	6025.03	7661.83	7579.6	8450.15	7075.09	7669.12	8314.89	5895.4	6368.6	7120.61	5912.24	6038.81	7061.4	0.437059	0.460578
2.48_371.0581m/z	371.058	2.48138	neg	M+Na-2H	C13H18O11	-4.12726	96.3013	100 - 14.7 - 3.26 - 0.373	HMDB0130161	3,4,5-trihydroxy-6-(3,4,5-trihydroxycyclohex-1-ene-1-carbonyloxy)oxane-2-carboxylic acid	Organic compounds	Organic oxygen compounds	Organooxygen compounds	3608.49	3272.29	3977.91	4563.26	4171.76	5119.2	3770.35	3691.98	2923.25	3945.79	5237.46	3925	3319	4059.42	4548.99	5401.02	5508.03	6831.23	3208.39	3786.62	3507.41	4280.96	5091.26	4990.37	0.226491	0.443911
1.17_298.0973m/z	298.097	1.1656	pos	M+NH4	C11H12N4O3S	1.70229	90.0095	100 - 14.4 - 6.1 - 0.744	HMDB0014802	Sulfametopyrazine	Organic compounds	Benzenoids	Benzene and substituted derivatives	56.4596	264.969	582.284	67.9333	455.225	917.347	684.065	376.111	346.377	945.781	587.195	496.423	264.875	211.333	206.526	332.729	250.453	237.252	275.672	227.097	318.935	322.327	293.454	337.915	0.055296	0.436772
4.74_402.2261n	425.215	4.74298	pos	M+Na, M+K, M+H	C20H34O8	1.72681	97.6684	100 - 22.3 - 4.02 - 0.527	HMDB0034159	Acetyl tributyl citrate	Organic compounds	Organic acids and derivatives	Carboxylic acids and derivatives	413.098	435.753	696.478	451.17	757.457	775.468	758.18	625.582	576.726	753.817	664.361	716.269	651.482	772.443	1219.4	780.621	703.924	729.682	706.426	767.574	693.505	650.301	701.626	717.362	0.0877159	0.432873
2.52_1030.6215n	516.318	2.52427	pos	M+2H, M+H, M+Na	C50H96O17P2	8.92062	76.161	100 - 55.8 - 18.8 - 4.69 - 0.952 - 0.165	HMDB0124561	CL(10:0/10:0/10:0/11:0)	Organic compounds	Lipids and lipid-like molecules	Glycerophospholipids	259.138	224.007	295.304	259.298	228.937	369.753	482.91	354.977	193.928	414.7	416.852	134.12	271.863	362.771	248.799	308.5	286.614	436.274	494.397	566.3	346.204	312.959	467.58	289.461	0.136571	0.424956
0.60_256.0580m/z	256.058	0.603417	neg	M+Cl	C8H15NO6	-6.15974	95.6512	100 - 9.42 - 1.63 - 0.125	HMDB0001129	N-Acetylmannosamine	Organic compounds	Organic oxygen compounds	Organooxygen compounds	99.0338	251.848	245.342	127.455	342.066	354.59	308.036	199.936	257.867	403.578	381.754	391.838	314.286	230.184	231.46	469.184	473.128	387.983	296.748	260.134	272.825	475.843	424.148	367.283	0.173224	0.418409
2.27_853.3305n	852.323	2.2678	neg	M-H, M+Na-2H	C47H51NO14	-0.476268	89.3473	100 - 52.3 - 16.3 - 3.75 - 0.7 - 0.111	HMDB0015360	Paclitaxel	Organic compounds	Lipids and lipid-like molecules	Prenol lipids	1013.53	1164.88	1114.95	1147.7	1218.66	1382.62	1071.97	1342.58	940.193	1274.76	1542.28	1141.03	1093.31	995.594	1378.05	1281.46	1088.39	1661.5	876.56	1047.11	821.32	950.106	1379.28	877.331	0.153083	0.393712
1.05_415.2291m/z	415.229	1.05132	neg	M+Cl	C22H36O5	9.10142	92.3536	100 - 24.4 - 3.88 - 0.462	HMDB0002082	Bisnorcholic acid	Organic compounds	Lipids and lipid-like molecules	Steroids and steroid derivatives	731.71	184.956	93.8564	767.455	234.751	103.2	91.1375	108.751	30.5665	96.9676	162.108	42.6744	76.8738	218.249	507.287	113.581	311.706	682.11	72.6578	172.438	59.6099	73.4147	215.118	73.0632	0.0648932	0.391205
2.09_874.3960m/z	874.396	2.08995	pos	2M+NH4	C24H28O7	-5.6882	88.8394	100 - 26.5 - 4.82 - 0.657	HMDB0041198	Edulisin V	Organic compounds	Phenylpropanoids and polyketides	Coumarins and derivatives	230.539	169.414	122.028	132.5	135.055	173.457	89.5103	184.314	84.608	69.2016	212.316	64.869	135.41	104.656	38.1501	50.3842	68.3316	273.751	59.8339	133.464	42.0345	62.6051	98.7002	33.1567	0.124868	0.385512
2.47_756.4812m/z	756.481	2.47425	neg	M+FA-H	C39H70NO8P	-1.32486	76.9932	100 - 43.7 - 10.9 - 2.01 - 0.295	HMDB0009155	PE(18:3(9Z,12Z,15Z)/16:1(9Z))	Organic compounds	Lipids and lipid-like molecules	Glycerophospholipids	67.3558	189.759	205.983	69.4423	209.421	229.315	293.962	165.719	251.221	143.038	176.651	214.641	172.511	306.453	150.457	264.79	273.114	190.495	289.146	230.747	234.479	254.76	163.051	283.334	0.149955	0.377758
1.84_579.0247m/z	579.025	1.84135	neg	M-H	C15H22N2O18P2	-4.05068	80.6664	100 - 17.9 - 5.21 - 0.741 - 0.123	HMDB0012304	UDP-L-iduronate	Organic compounds	Nucleosides, nucleotides, and analogues	Pyrimidine nucleotides	1434.96	2179.22	2080.96	1503.95	2693.22	2705.38	2485.8	2258.09	1612.01	2939	3186.51	2119.04	1613.91	1998.07	2308.03	2185.15	2652.79	3180.75	1843.56	2120.34	1980.96	2581.97	3032.38	2746.47	0.717184	0.37184
1.00_514.2754n	515.283	1.00202	pos	M+H, M+Na	C26H42O10	-4.61886	91.4536	100 - 29 - 6.1 - 0.958 - 0.125	HMDB0035096	Cofaryloside	Organic compounds	Lipids and lipid-like molecules	Prenol lipids	531.159	360.704	441.284	584.603	507.101	570.15	370.5	435.06	312.422	360.842	600.479	366.97	413.019	359.948	585.887	412.798	375.689	791.926	277.272	415.322	340.218	287.533	409.533	379.692	0.0994496	0.369541
2.08_302.1493m/z	302.149	2.0828	pos	M+H	C16H19N3O3	-2.01493	86.4378	100 - 18.7 - 2.28 - 0.208	HMDB0029091	Tryptophyl-Proline	Organic compounds	Organic acids and derivatives	Carboxylic acids and derivatives	181.463	127.392	172.217	196.775	145.592	229.034	144	178.39	146.426	121.653	246.591	183.487	163.908	122.11	228.791	151.628	89.6816	194.916	123.365	172.467	88.2099	96.4647	106.993	74.299	0.0522245	0.34685
4.97_653.4037m/z	653.404	4.97082	neg	M+Cl	C40H58O5	9.49922	71.8224	100 - 44.1 - 10.5 - 1.78 - 0.238	HMDB0029654	3,6-Epoxy-5,5',6,6'-tetrahydro-b,b-carotene-3',5,5',6'-tetrol	Organic compounds	Lipids and lipid-like molecules	Prenol lipids	238.016	370.812	575.724	179.345	231.794	705.152	625.3	426.516	398.922	467.415	280.3	339.079	395.559	470.181	413.01	241.466	368.433	250.248	398.829	311.24	361.258	210.871	217.283	192.513	0.363519	0.34578
0.82_384.9817m/z	384.982	0.817	neg	M-H2O-H	C9H14N2O12P2	-6.51521	87.4138	100 - 11.1 - 3.03 - 0.289	HMDB0000295	Uridine 5'-diphosphate	Organic compounds	Nucleosides, nucleotides, and analogues	Pyrimidine nucleotides	114.965	199.665	219.022	83.0225	250.731	247.56	287.23	185.751	213.733	328.759	283.386	303.509	151.732	263.439	161.226	269.899	386.291	224.817	246.303	231.832	205.432	371.535	331.644	302.967	0.121914	0.345203
7.30_677.4982n	678.505	7.30387	pos	M+H, M+Na	C36H72NO8P	-2.01119	90.1332	100 - 40.4 - 9.61 - 1.68 - 0.237	HMDB0008010	PC(16:1(9Z)/20:0)	Organic compounds	Lipids and lipid-like molecules	Glycerophospholipids	117.463	310.484	292.7	24.3353	181.943	114.542	417.327	205.215	326.106	263.488	73.2024	250.422	485.927	565.963	105.39	396.46	544.75	39.8985	448.657	269.893	250.254	349.658	125.954	162.173	0.256206	0.34006
4.17_524.2769m/z	524.277	4.1672	neg	M+Na-2H	C25H46NO7P	2.04652	92.1822	100 - 28.2 - 5.27 - 0.738	HMDB0011516	LysoPE(20:3(8Z,11Z,14Z)/0:0)	Organic compounds	Lipids and lipid-like molecules	Glycerophospholipids	256.912	624.739	1105.12	262.792	726.83	1151.4	1053.63	658.68	498.786	1027.36	748.843	548.31	670.853	510.993	525.385	749.259	496.119	631.288	610.282	540.534	512.204	682.838	566.111	511.75	0.520177	0.338442
2.00_506.2605m/z	506.261	2.00492	neg	3M-H	C12H11N	0.655654	89.482	100 - 13.5 - 0.836	HMDB0032562	Diphenylamine	Organic compounds	Benzenoids	Benzene and substituted derivatives	2107.36	3801.65	4206.22	1905.43	4338	5394.95	2489.64	4387.91	2184.47	2992.37	5796.41	2937.52	3912.99	2128.85	5305.05	5074.23	2440.34	7118.75	2239.73	3137.21	2265.62	2794.88	4322.43	2695.77	0.395946	0.337666
1.89_260.1027m/z	260.103	1.89063	neg	M-H	C13H15N3O3	-5.31485	88.4287	100 - 15.4 - 1.73 - 0.145	HMDB0029083	Tryptophyl-Glycine	Organic compounds	Organic acids and derivatives	Carboxylic acids and derivatives	259.884	110.951	109.056	285.898	139.37	148.981	88.4915	122.205	122.606	116.442	172.184	153.693	115.626	128.261	163.467	158.971	153.084	209.257	67.4835	95.7964	75.6552	100.801	163.091	95.6973	0.063025	0.314802
0.51_192.9579m/z	192.958	0.511267	neg	2M-H	H3NO3S	-7.77912	84.7482	100 - 1.31 - 5.14	HMDB0034830	Amidosulfonic acid	Inorganic compounds	Homogeneous non-metal compounds	Other non-metal organides	256.194	371.177	415.245	293.17	341.578	517.676	329.019	462.529	492.057	495.771	508.568	521.574	475.005	699.512	465.016	578.575	776.368	331.863	448.885	435.674	371.225	526.963	552.735	348.067	0.0526502	0.311543
0.56_131.0818m/z	131.082	0.560567	neg	M-H	C5H12N2O2	-6.42619	93.6206	100 - 6.35 - 0.582	HMDB0003374	D-Ornithine	Organic compounds	Organic acids and derivatives	Carboxylic acids and derivatives	59.5039	85.1654	79.769	85.4881	114.302	133.924	130.12	84.9239	95.211	140.472	145.79	137.36	103.848	92.4196	103.925	154.489	195.702	139.613	95.4859	100.363	142.582	168.177	160.209	195.469	0.088112	0.306469
0.57_220.8700m/z	220.87	0.57485	neg	M+Cl	C2Cl3F3	-6.21858	42.6041	100 - 2.16 - 95.9 - 2.07 - 30.7 - 0.663 - 3.27	HMDB0031155	1,1,2-Trichloro-1,2,2-trifluoroethane	Organic compounds	Organohalogen compounds	Organofluorides	106.337	143.488	187.57	126.249	201.615	233.278	186.163	157.081	142.247	229.414	223.075	220.08	193.535	209.277	174.764	239.287	327.907	238.549	160.215	184.555	178.261	261.39	276.36	244.308	0.129825	0.304634
3.73_219.1015m/z	219.101	3.73288	neg	M-H	C13H16O3	-5.37714	91.9707	100 - 14.4 - 1.57 - 0.127	HMDB0132948	1-(4-methoxyphenyl)-4-methylpentane-2,3-dione	Organic compounds	Benzenoids	Phenol ethers	23.2663	73.8656	261.462	29.9931	91.5682	300.245	236.904	119.075	74.0584	231.31	110.942	63.6805	108.324	60.0145	95.9341	114.197	76.4763	114.35	54.8686	69.3938	63.9164	62.4794	74.4869	58.2038	0.279185	0.295179
1.29_146.0611m/z	146.061	1.29347	pos	M+H-2H2O	C9H11NO3	5.93636	91.6781	100 - 10.3 - 1.1	HMDB0059720	Meta-Tyrosine	Organic compounds	Organic acids and derivatives	Carboxylic acids and derivatives	193.656	221.161	208.033	284.36	353.314	360.589	261.585	237.863	229.816	355.496	345.019	334.332	296.568	314.624	329.712	341.205	362.555	431.162	274.941	298.379	357.915	288.221	337.107	371.745	0.137119	0.291823
2.50_729.0855m/z	729.086	2.50282	neg	M+Cl	C33H26O17	-1.22613	95.846	100 - 36.6 - 10 - 2.03 - 0.347	HMDB0033274	Guavin B	Organic compounds	Phenylpropanoids and polyketides	Tannins	3414.66	2803.71	3476.14	3736.08	2941.22	3576.38	2728.6	3296.26	2006.4	1999.21	3828.28	1986.67	2602.72	3130.84	5366.07	3839.68	3274.36	6596.07	2372.09	3422.99	3318.25	2445.39	3314.33	3588.14	0.0667644	0.284742
0.81_540.0512m/z	540.051	0.809867	neg	M-H2O-H	C15H23N5O14P2	-4.66185	84.5013	100 - 18.8 - 4.56 - 0.636	HMDB0001178	Adenosine diphosphate ribose	Organic compounds	Nucleosides, nucleotides, and analogues	Purine nucleotides	75.3249	202.552	205.145	53.5411	231.315	264.602	298.815	144.842	230.108	402.013	290.199	283.021	196.812	328.931	163.287	255.476	431.116	221.196	271.257	241.289	215.683	328.213	238.703	243.192	0.134955	0.282596
7.30_722.4961m/z	722.496	7.29667	neg	3M-H	C13H23NO3	0.0467227	88.131	100 - 14.8 - 1.64 - 0.134	HMDB0038588	Dioscoretine	Organic compounds	Lipids and lipid-like molecules	Fatty Acyls	10.9047	126.404	116.573	2.40267	66.3081	43.0082	184.067	83.4749	161.03	99.7092	16.8042	112.365	194.678	365.139	31.8551	131.693	272.975	4.3641	203.384	138.63	120.736	108.585	84.624	66.0526	0.217039	0.274408
4.20_758.0442m/z	758.044	4.19577	neg	3M-H	C9H8ClN5S	-6.85891	67.8014	100 - 12.5 - 37.2 - 4.53 - 1.72 - 0.18	HMDB0060964	5-Chloro-4-(2-imidazolin-4-on-2-ylamino)-2,1,3-benzothiazdiazole	Organic compounds	Organoheterocyclic compounds	Benzothiadiazoles	43.451	77.6189	76.4235	31.8901	54.7999	70.1869	152.549	80.895	93.8367	88.5005	70.1894	36.1551	104.071	131.589	99.5029	70.6266	70.1794	68.4598	147.926	131.479	138.87	95.4553	77.8841	47.3663	0.105355	0.270496
1.04_950.3713m/z	950.371	1.03702	neg	3M-H	C17H19NO5	-0.446875	86.1634	100 - 19.2 - 2.76 - 0.295	HMDB0137022	3-(3,4-dihydroxyphenyl)-N-[2-(3,4-dihydroxyphenyl)ethyl]propanimidic acid	Organic compounds	Benzenoids	Phenols	498.84	601.993	719.551	488.431	640.174	854.825	484.307	734.057	426.782	486.184	953.453	579.08	637.477	457.815	776.541	814.254	562.494	1019.8	396.235	546.575	360.506	479.804	673.109	493.088	0.183953	0.261664
5.04_658.5099m/z	658.51	5.04158	pos	2M+NH4	C20H32O3	8.97753	89.9193	100 - 22.1 - 2.94 - 0.291	HMDB0112071	12,15-Epoxy-13,14-dimethyloctadeca-12,14,16-trienoic acid	Organic compounds	Lipids and lipid-like molecules	Fatty Acyls	78.849	82.3231	129.836	83.5589	63.3802	99.2034	169.495	170.066	90.0941	99.5642	152.728	111.18	107.895	108.426	137.448	125.98	121.502	126.794	114.566	184.029	163.418	91.0207	97.5953	174.548	0.05312	0.259214
2.45_202.1074m/z	202.107	2.44567	neg	M-H	C9H17NO4	-5.31159	90.2321	100 - 10.4 - 1.31	HMDB0062176	N-lactoyl-Leucine	Organic compounds	Organic acids and derivatives	Carboxylic acids and derivatives	40.9844	75.4733	102.468	48.0567	102.75	121.408	123.398	67.5014	72.9726	122.831	84.927	94.1013	100.141	122.99	78.5344	133.782	163.391	113.306	104.759	81.0952	117.957	126.548	106.679	140.72	0.100231	0.252502
3.88_412.1172n	393.099	3.88218	neg	M-H2O-H, M+Na-2H	C22H20O8	3.28323	93.5613	100 - 24.3 - 4.47 - 0.609	HMDB0033341	Mollicellin C	Organic compounds	Phenylpropanoids and polyketides	Depsides and depsidones	290.197	215.956	274.606	226.027	259.075	240.002	379.722	287.492	329.01	234.343	183.812	189.304	395.563	446.912	281.862	304.473	309.321	234.841	376.186	328.045	362.528	263.978	216.901	216.791	0.238008	0.249642
2.31_772.5062n	409.242	2.31067	pos	M+2Na, M+NH4	C45H73O8P	2.48373	61.2282	100 - 49.8 - 13.8 - 2.75 - 0.436	HMDB0115601	PA(22:5(7Z,10Z,13Z,16Z,19Z)/20:3(8Z,11Z,14Z))	Organic compounds	Lipids and lipid-like molecules	Glycerophospholipids	233.987	224.293	313.482	318.424	330.651	468.495	201.592	297.051	251.945	252.459	388.89	297.631	369.562	246.417	351.716	324.192	250.698	496.727	190.07	257.265	191.29	218.342	263.763	247.957	0.0786201	0.247749
0.80_970.1669m/z	970.167	0.802717	neg	M+FA-H	C28H46N7O20P3S	-4.73971	88.5395	100 - 34.9 - 14.6 - 3.63 - 0.838 - 0.156	HMDB0012155	3-Hydroxypimelyl-CoA	Organic compounds	Lipids and lipid-like molecules	Fatty Acyls	146.104	202.748	215.76	120.386	293.999	275.474	265.985	253.451	323.767	335.354	297.537	381.982	242.502	273.144	167.941	358.555	429.623	244.05	257.676	255.27	180.201	364.312	424.323	202.913	0.17405	0.242743
2.13_456.2802m/z	456.28	2.12565	neg	M-H2O-H	C21H41N5O7	-5.4749	84.8573	100 - 25.3 - 4.51 - 0.601	HMDB0015090	Netilmicin	Organic compounds	Organic oxygen compounds	Organooxygen compounds	215.09	121.441	62.9237	275.479	114.095	56.0434	52.7773	134.977	154.69	40.2117	149.406	181.222	97.0871	137.483	198.425	111.376	111.166	235.963	55.7526	117.481	55.9513	48.5987	124.274	44.77	0.194488	0.242675
5.71_689.4922m/z	689.492	5.71022	pos	M+2H	C75H142O17P2	-1.73151	85.1883	100 - 83.4 - 37.8 - 12.2 - 3.12 - 0.668 - 0.124	HMDB0123938	CL(8:0/18:2(9Z,11Z)/i-20:0/i-20:0)	Organic compounds	Lipids and lipid-like molecules	Glycerophospholipids	737.254	490.582	519.46	793.707	668.845	607.771	815.245	859.936	478.227	816.481	1015.49	605.653	660.969	560.439	475.089	744.5	547.872	579.872	565.028	651.247	595.703	593.863	637.293	651.298	0.108837	0.242074
2.69_575.2620m/z	575.262	2.68783	pos	M+K	C29H44O9	0.613784	89.5201	100 - 32.2 - 6.87 - 1.1 - 0.144	HMDB0041137	Corchorosol A	Organic compounds	Lipids and lipid-like molecules	Steroids and steroid derivatives	251.118	182.771	237.58	370.413	290.036	344.534	131.697	221.69	154.835	136.343	310.731	190.241	213.171	165.986	304.701	298.608	197.366	476.604	166.487	236.896	155.879	166.123	224.652	156.449	0.0691172	0.24132
2.32_829.3225m/z	829.323	2.32495	neg	2M+FA-H	C24H24O5	-0.560491	78.976	100 - 26.4 - 4.38 - 0.543	HMDB0030655	Calabaxanthone	Organic compounds	Organoheterocyclic compounds	Benzopyrans	1177.71	709.608	945.401	1188.29	711.85	1043.54	680.911	1242.92	636.854	722.134	1290.01	705.776	920.333	788.142	1428.24	1048.55	767.976	1596.09	607.709	950.157	665.911	625.934	1117.01	686.629	0.2639	0.240818
1.81_319.1405m/z	319.14	1.81278	pos	M+H	C15H18N4O4	1.31171	87.1403	100 - 18 - 2.36 - 0.23	HMDB0029107	Tyrosyl-Histidine	Organic compounds	Organic acids and derivatives	Carboxylic acids and derivatives	192.167	115.858	185.876	240.986	148.874	223.105	98.6813	168.874	110.441	101.331	209.921	121.731	169.52	94.4072	319.61	181.897	95.7755	329.131	95.1093	129.38	109.14	82.6619	105.738	101.749	0.0538684	0.239343
2.19_277.0168m/z	277.017	2.18993	neg	M+FA-H	C12H8O3S	-3.54747	88.2489	100 - 14 - 6.04 - 0.718	HMDB0035145	Chrycolide	Organic compounds	Organoheterocyclic compounds	Benzofurans	249.847	219.096	249.172	289.548	268.433	338.632	247.11	248.858	191.761	303.075	349.245	269.716	244.544	293.852	307.06	355.025	351.327	428.335	232.242	277.576	263.773	290.821	386.664	353.148	0.189653	0.235922
0.76_187.0414m/z	187.041	0.759867	neg	M-H2O-H	C11H10O4	6.52526	95.6042	100 - 12.2 - 1.5 - 0.122	HMDB0136784	6-(hydroxymethyl)-7-methoxy-2H-chromen-2-one				777.876	1476.93	1668.54	1061.06	1516.05	1828.48	4499.38	1391.86	862.635	6719.27	3256.64	1027.76	2391.09	2613.9	1072.27	3269.77	3368.66	1236.79	1332.45	1621.33	1482.81	1042.32	1070.22	1770.07	0.127167	0.234488
1.03_393.1755m/z	393.176	1.02988	neg	M-H	C21H27FO6	9.27345	87.2217	100 - 23.3 - 3.81 - 0.468	HMDB0014758	Triamcinolone	Organic compounds	Lipids and lipid-like molecules	Steroids and steroid derivatives	262.673	116.23	119.048	268.268	173.483	147.285	118.418	129.767	70.3858	139.499	182.921	106.448	100.252	143.971	135.14	137.472	158.705	188.175	96.8369	110.529	101.218	123.597	174.302	166.18	0.150231	0.230975
2.61_599.3751m/z	599.375	2.60925	neg	M-H2O-H	C39H54O6	1.39646	89.294	100 - 43 - 10.3 - 1.76 - 0.24	HMDB0040495	cis-p-Coumaroylcorosolic acid	Organic compounds	Lipids and lipid-like molecules	Prenol lipids	497.641	2765.31	4140.31	676.371	2684.57	3480.78	1365.69	3085.77	725.489	1410.11	3119.05	680.469	3586.46	160.053	1914.97	3625.99	139.91	2194.23	1907.18	2227.02	1935.16	1772.24	2233.45	1938.89	0.828902	0.229628
4.74_448.2911m/z	448.291	4.74298	pos	M+H-2H2O	C26H45NO5S	6.37555	89.4	100 - 30 - 9.89 - 2.03 - 0.329	HMDB0000722	Lithocholyltaurine	Organic compounds	Lipids and lipid-like molecules	Steroids and steroid derivatives	163.857	123.469	229.456	105.47	199.813	177.625	243.116	218.498	185.384	176.299	179.661	143.422	222.575	239.816	357.955	213.262	170.418	207.617	231.588	247.475	222.404	144.201	156.908	202.777	0.132466	0.22804
6.96_723.5484m/z	723.548	6.96243	pos	2M+Na	C22H38O3	-7.20939	95.3747	100 - 24.3 - 3.45 - 0.36	HMDB0112078	3,鈥?-鈥婦imethyl-鈥?-鈥媝ropyl-2-鈥媐urantridecanoic acid	Organic compounds	Lipids and lipid-like molecules	Fatty Acyls	21.9293	72.439	58.8563	16.5039	62.7825	58.0228	175.32	63.0849	156.706	206.096	69.2665	186.383	178.791	124.158	39.5694	268.499	169.883	9.11321	148.548	60.1802	97.0889	152.702	66.8039	96.6633	0.0644303	0.220431
2.50_353.1950m/z	353.195	2.50282	neg	2M+FA-H	C9H14O2	-6.35442	92.1709	100 - 9.97 - 0.855	HMDB0032442	2-Nonenoic acid gamma-lactone	Organic compounds	Organoheterocyclic compounds	Dihydrofurans	1757.74	1495.74	1656.51	2000.04	1677.34	1886.5	1553.97	1623.3	1095.12	1267.4	2068.69	1248.95	1319.51	1610.54	2078.7	1977.06	1841.51	2807.43	1203.39	1489.9	1417.96	1296.7	1657.15	1679.1	0.0626814	0.22027
2.39_766.6227m/z	766.623	2.38855	pos	M+H-2H2O	C45H87NO10	4.46788	59.3578	100 - 50.4 - 14.5 - 3.04 - 0.511	HMDB0035402	Culinariside	Organic compounds	Lipids and lipid-like molecules	Sphingolipids	31.1614	92.1468	152.543	63.9543	194.92	259.275	138.705	147.473	202.909	246.459	167.521	231.097	223.06	350.085	58.9786	285.773	383.857	114.5	186.834	244.719	209.683	134.715	204.783	96.0836	0.247077	0.211999
8.80_784.5858m/z	784.586	8.80468	pos	M+CH3OH+H	C43H78NO7P	0.986292	96.9269	100 - 48 - 12.7 - 2.42 - 0.365	HMDB0011417	PE(P-18:1(11Z)/20:3(8Z,11Z,14Z))	Organic compounds	Lipids and lipid-like molecules	Glycerophospholipids	57.4816	76.3527	68.5641	16.5946	61.7346	44.358	201.622	64.0265	289.189	117.268	55.9404	154.996	190.061	155.669	33.1763	185.347	139.728	22.5672	175.498	121.008	54.3024	189.429	72.6044	56.7026	0.131123	0.205342
1.00_553.1734m/z	553.173	1.00202	neg	M+Na-2H	C27H32O11	8.04266	84.4812	100 - 30 - 6.6 - 1.08 - 0.148	HMDB0125834	3,4,5-trihydroxy-6-{[4-hydroxy-7-methoxy-2,2-dimethyl-6-(3-phenylpropanoyl)-3,4-dihydro-2H-1-benzopyran-5-yl]oxy}oxane-2-carboxylic acid	Organic compounds	Organic oxygen compounds	Organooxygen compounds	194.863	170.99	186.256	207.798	180.967	239.224	171.569	206.221	59.6726	215.398	276.023	76.0385	161.567	136.483	297.423	246.259	145.414	444.142	148.427	208.379	198.29	217.363	315.202	264.488	0.434089	0.204708
4.05_299.2833n	282.28	4.0458	pos	M+H-H2O, M+Na, M+H	C18H37NO2	2.83223	94.6722	100 - 20.3 - 2.37 - 0.203	HMDB0001480	3-Dehydrosphinganine	Organic compounds	Organic oxygen compounds	Organooxygen compounds	155.253	440.443	593.017	242.824	801.33	1001.21	879.648	613.355	734.315	1193.6	800.655	1200.59	761.252	1056.92	560.457	893.891	1272.86	760.596	777.359	651.993	407.431	908.917	736.316	436.091	0.0629808	0.201567
0.96_284.0095m/z	284.01	0.95915	neg	M+Cl	C8H12NO6P	-0.324853	94.1158	100 - 9.38 - 1.63 - 0.125	HMDB0001319	Pyridoxine 5'-phosphate	Organic compounds	Organoheterocyclic compounds	Pyridines and derivatives	92.3501	58.0618	103.558	100.455	100.208	107.769	82.4634	97.8441	55.431	122.869	138.282	133.021	64.15	153.143	116.266	129.025	162.198	142.22	75.0621	90.4797	96.0929	124.903	141.404	196.111	0.321098	0.200058
4.30_535.3495m/z	535.35	4.29507	neg	2M+FA-H	C11H23N3O3	7.02404	96.4354	100 - 13.4 - 1.44 - 0.114	HMDB0029132	Valyl-Lysine	Organic compounds	Organic acids and derivatives	Carboxylic acids and derivatives	55.5098	119.217	115.701	59.3792	137.221	139.53	172.558	108.991	137.776	160.307	122.111	123.348	156.221	193.337	109.571	140.038	172.616	132.138	149.43	131.36	112.338	148.184	155.14	103.575	0.0726368	0.196779
4.67_297.2419m/z	297.242	4.66508	neg	M+FA-H	C17H32O	-6.27286	92.9893	100 - 18.8 - 1.87 - 0.131	HMDB0041335	8-Heptadecenal	Organic compounds	Lipids and lipid-like molecules	Fatty Acyls	90.7467	51.3104	98.7764	79.1148	93.1169	90.3004	145.318	90.6214	111.77	91.8789	166.064	18.3219	122.167	138.53	68.7218	148.668	146.38	111.926	161.349	150.289	124.054	77.1937	34.2938	150.182	0.373644	0.192236
5.67_755.5315m/z	755.531	5.66805	pos	M+2Na	C81H158O17P2	-8.84897	82.7151	100 - 90.1 - 43.6 - 14.9 - 4.01 - 0.9 - 0.175	HMDB0124443	CL(8:0/i-21:0/i-21:0/i-22:0)	Organic compounds	Lipids and lipid-like molecules	Glycerophospholipids	362.792	241.55	233.221	379.285	278.486	253.129	406.55	384.371	230.666	340.583	423.062	253.498	347.102	212.891	203.106	395.674	163.179	254.646	249.996	276.498	274.575	232.063	290.474	281.639	0.233094	0.190883
2.04_571.2784n	616.286	2.03993	neg	M-H2O-H, M+FA-H	C32H37N5O5	-1.84372	82.9155	100 - 37.1 - 7.7 - 1.16 - 0.139	HMDB0005774	Endomorphin-2	Organic compounds	Organic acids and derivatives	Carboxylic acids and derivatives	742.721	394.5	301.495	740.279	373.004	292.672	431.739	400.367	236.525	433.606	445.23	269.534	279.239	486.042	408.121	279.511	472.679	516.909	346.864	540.539	225.063	389.279	696.771	212.414	0.709022	0.189466
0.55_306.1013n	327.065	0.546283	neg	M-H2O-H, M+Na-2H	C13H12F2N6O	-8.92891	95.4373	100 - 16.4 - 1.47	HMDB0014342	Fluconazole	Organic compounds	Benzenoids	Benzene and substituted derivatives	69.8624	76.6183	79.981	65.0927	84.4975	105.273	98.6677	65.8904	88.9305	76.6717	99.0702	105.369	94.8659	89.4101	82.5441	119.147	174	89.9821	92.8919	95.7013	108.1	101.772	94.4363	107.44	0.121737	0.188825
3.68_393.0989m/z	393.099	3.6836	neg	M+Na-2H	C20H20O7	8.87498	95.7155	100 - 22.1 - 3.77 - 0.473	HMDB0037508	Oxidihydroartocarpesin	Organic compounds	Phenylpropanoids and polyketides	Flavonoids	49.4381	56.6264	61.7553	50.1417	47.2696	41.7963	67.2977	61.9409	77.3469	52.7189	11.7385	23.6591	104.442	90.0362	69.0617	38.7341	58.1927	37.542	96.7591	83.0608	73.4464	51.4646	50.3024	79.6841	0.189875	0.188324
3.72_214.2539m/z	214.254	3.71863	pos	2M+NH4	C7H14	5.01547	95.1056	100 - 7.73 - 0.258	HMDB0061894	(E)-4,4-Dimethyl-2-pentene	Organic compounds	Hydrocarbons	Unsaturated hydrocarbons	34.7853	55.0011	80.5528	43.432	96.2355	120.228	97.2645	68.7725	81.97	90.4634	89.0063	110.509	87.63	98.698	91.7124	106.573	93.2753	88.6918	90.3299	97.89	92.88	94.2419	94.861	94.1518	0.139797	0.18766
7.72_384.9970m/z	384.997	7.71598	neg	2M+FA-H	C3H7O6P	8.15023	98.6408	100 - 3.55 - 1.28	HMDB0001473	Dihydroxyacetone phosphate	Organic compounds	Organic oxygen compounds	Organooxygen compounds	18.88	35.2264	32.8478	7.54389	13.8987	20.7716	56.5286	20.6837	36.2679	39.3138	54.5377	92.7409	53.0818	26.1324	18.1187	118.353	5.83235	36.4796	55.7509	32.3431	39.8171	60.7918	69.169	38.6008	0.20484	0.185496
2.50_290.0927n	271.075	2.50282	neg	M-H2O-H, M-H, M+Cl	C19H14O3	-5.40898	91.2102	100 - 20.8 - 2.67 - 0.256	HMDB0034688	2,3-Dihydro-2,3-dihydroxy-9-phenyl-1H-phenalen-1-one	Organic compounds	Benzenoids	Naphthalenes	254.127	230.375	266.626	268.593	255.631	285.254	250.629	266.75	185.412	222.803	320.887	230.324	235.575	256.643	309.796	341.294	346.75	452.895	213.161	252.622	247.283	269.484	324.074	323.058	0.0763076	0.179609
0.81_431.1388m/z	431.139	0.809867	neg	M-H	C22H24O9	9.32971	86.6413	100 - 24.4 - 4.7 - 0.663	HMDB0135638	3,4,5-trihydroxy-6-{4-[3-(4-methoxyphenyl)-3-oxopropyl]phenoxy}oxane-2-carboxylic acid	Organic compounds	Phenylpropanoids and polyketides	Flavonoids	370.338	437.803	472.13	380.293	560.511	630.075	444.388	297.71	354.68	586.429	530.163	470.148	375.041	488.916	408.182	519.128	708.813	583.352	336.162	356.839	333.983	448.6	494.7	421.503	0.28121	0.178395
4.92_355.2846m/z	355.285	4.92085	pos	2M+H	C11H17N2+	-2.93993	91.0176	100 - 12.8 - 0.757	HMDB0001009	N-Methylnicotinium	Organic compounds	Organoheterocyclic compounds	Pyridines and derivatives	56.0574	53.1692	103.695	59.3435	55.6147	109.18	54.7292	81.9363	79.4694	29.1339	49.8797	87.0936	69.5169	61.7137	125.879	72.891	60.6279	60.1098	65.0385	135.654	121.179	59.5607	109.208	76.3742	0.269499	0.170351
0.57_222.0727n	221.065	0.57485	neg	M-H, M+FA-H, M+Cl	C8H14O7	-5.43233	95.4299	100 - 9.08 - 1.8 - 0.139	HMDB0131286	6-ethoxy-3,4,5-trihydroxyoxane-2-carboxylic acid	Organic compounds	Organic oxygen compounds	Organooxygen compounds	275.821	245.789	191.73	287.003	262.711	315.883	304.659	165.763	217.828	154.54	319.048	310.479	231.989	148.843	341.148	368.257	476.759	301.412	249.097	308.553	274.567	315.864	290.842	259.192	0.45229	0.167104
0.55_259.0774m/z	259.077	0.546283	neg	M-H	C15H13FO3	-0.842933	90.2377	100 - 16.5 - 1.89 - 0.162	HMDB0060917	4'-Hydroxyflurbiprofen	Organic compounds	Benzenoids	Benzene and substituted derivatives	86.82	118.866	94.3648	97.1576	124.489	153.987	133.846	89.3663	112.101	113.667	142.687	190.36	131.273	110.709	108.265	163.169	239.785	125.171	109.019	114.488	139.301	158.201	150.392	142.628	0.407038	0.166838
4.96_427.2454m/z	427.245	4.95657	pos	M+Na	C24H36O5	-0.129588	76.0308	100 - 26.6 - 4.41 - 0.549	HMDB0038152	Lucidone C	Organic compounds	Lipids and lipid-like molecules	Steroids and steroid derivatives	15.1894	22.6997	18.0262	14.9795	20.391	10.6089	17.2607	17.9131	23.1915	20.6564	21.8059	40.1753	25.7741	40.0015	12.7553	23.5368	52.9096	12.4263	38.8567	28.45	32.3072	35.2553	23.9441	34.5376	0.0706651	0.164951
0.66_132.0294m/z	132.029	0.660567	neg	M-H	C4H7NO4	-6.25566	94.479	100 - 4.92 - 0.919	HMDB0062501	N-acetyl-seryl-aspartate	Organic compounds	Organic acids and derivatives	Carboxylic acids and derivatives	48.2325	101.456	90.3919	49.5321	125.294	106.547	109.068	75.1034	95.1338	139.467	107.886	129.584	98.6073	143.829	71.4176	133.377	203.125	105.775	98.0972	79.2582	94.208	129.946	119.622	131.975	0.242113	0.161636
3.10_213.0111m/z	213.011	3.1	neg	M-H2O-H	C11H8N2O2S	-7.52039	83.2991	100 - 13.6 - 5.79 - 0.667	HMDB0034209	Cyclobrassinone	Organic compounds	Organoheterocyclic compounds	Indoles and derivatives	15.7399	28.4914	15.6438	9.38523	38.8548	34.5957	36.1777	47.5793	14.2445	41.7742	56.026	22.4907	45.4605	39.5309	42.4511	47.9758	38.3879	48.704	37.6159	62.4468	32.4823	26.1863	61.6535	22.0361	0.0834127	0.159328
4.86_262.2304n	280.264	4.86442	pos	M+H, M+NH4	C18H30O	2.93087	91.6039	100 - 19.9 - 2.07 - 0.151	HMDB0037519	2-(5,8-Tetradecadienyl)cyclobutanone	Organic compounds	Organooxygen compounds	Carbonyl compounds	116.962	26.6258	91.6608	168.17	26.4819	123.588	65.9819	52.2979	58.2921	53.7344	49.1987	96.9329	145.661	120.892	70.7765	152.97	111.128	70.1881	145.722	101.606	87.1358	147.42	86.2761	67.694	0.152283	0.155397
0.96_311.0174m/z	311.017	0.95915	neg	M+Na-2H	C7H15O10P	8.37353	92.5938	100 - 8.12 - 2.34 - 0.172	HMDB0062754	Sedoheptulose 7-phosphate(2-)	Chemical entities	Organic compounds	Organic oxygen compounds	19.3568	29.6637	42.7487	18.8977	49.3722	43.1159	42.5514	41.0119	24.5582	46.2356	46.0766	60.069	31.5812	80.8003	42.5114	55.8037	67.3658	47.0794	37.4194	37.3651	37.8641	51.7616	70.7972	51.1902	0.119309	0.153397
4.73_450.2968m/z	450.297	4.72867	neg	M+Cl	C23H45NO5	-5.66352	87.1395	100 - 25.9 - 4.26 - 0.523	HMDB0061642	3-hydroxyhexadecanoyl carnitine	Organic compounds	Lipids and lipid-like molecules	Fatty Acyls	26.0148	109.133	95.8315	22.6647	102.26	87.1942	146.648	86.128	136.627	147.787	97.0046	115.196	102.12	161.124	73.7592	92.4059	174.662	75.4132	103.649	89.652	130.119	94.928	90.5391	116.014	0.101252	0.152944
4.76_307.2269m/z	307.227	4.75727	pos	M+CH3OH+H	C18H26O2	0.609107	89.4736	100 - 19.8 - 2.27 - 0.191	HMDB0037230	Citronellyl alpha-toluate	Organic compounds	Lipids and lipid-like molecules	Fatty Acyls	30.2728	22.4844	60.4064	37.3368	55.8817	73.2749	51.4296	61.2543	41.752	71.2704	95.0664	86.6841	49.3878	52.1121	38.4309	88.3568	64.4393	89.2616	30.7742	79.175	77.5899	46.4266	69.9629	104.421	0.306587	0.150545
0.82_164.0484n	182.082	0.817017	pos	M+H, M+NH4, M+H-H2O	C9H8O3	6.30235	90.5789	100 - 9.94 - 1.06	HMDB0000205	Phenylpyruvic acid	Organic compounds	Benzenoids	Benzene and substituted derivatives	79.4296	66.7856	100.927	74.8061	83.3669	81.129	129.925	95.1934	95.3262	102.897	91.7013	77.7165	95.2548	111.496	196.606	86.4731	100.288	108.416	71.6717	93.7798	88.8126	96.5837	103.018	129.222	0.135435	0.148647
0.54_373.0574m/z	373.057	0.539133	neg	M+Na-2H	C16H17ClN2O5	0.316548	87.6611	100 - 18.4 - 34.6 - 6.16 - 0.864	HMDB0030399	N-(Carbethoxyacetyl)-4-chloro-L-tryptophan	Organic compounds	Organic acids and derivatives	Carboxylic acids and derivatives	57.9851	80.9188	67.939	51.9583	93.2072	87.1655	92.9084	55.0527	83.308	62.8725	88.3246	117.139	93.9075	88.3776	73.9206	115.819	177.9	66.9006	76.6873	82.4254	91.4331	97.6251	89.8527	91.1101	0.251003	0.144778
2.40_905.8249m/z	905.825	2.39568	pos	M+CH3OH+H	C56H104O6	9.33051	53.3176	100 - 62 - 20.1 - 4.53 - 0.793 - 0.114	HMDB0062701	TG(17:0/18:1(9Z)/18:1(9Z))				39.7542	92.8205	119.927	41.9143	79.5657	173.013	143.689	78.8454	119.917	72.8493	149.397	143.162	188.952	215.79	38.7374	211.15	252.551	170.413	202.484	106.532	84.2593	144.979	62.1449	32.4606	0.066075	0.141954
1.71_265.1748m/z	265.175	1.70565	pos	M+NH4	C11H21NO5	-4.05621	71.012	100 - 12.7 - 1.77 - 0.156	HMDB0062735	(R)-3-hydroxybutyrylcarnitine	Organic compounds	Lipids and lipid-like molecules	Fatty Acyls	123.324	48.4615	40.71	135.08	15.4236	4.36547	10.617	42.9499	21.5139	0.959649	19.9816	5.62366	23.4827	14.3641	158.096	7.80475	22.3889	136.606	8.44287	30.6564	46.4445	11.0299	11.3508	12.8104	0.185082	0.134985
1.06_739.2371m/z	739.237	1.05845	neg	2M+FA-H	C14H21NO9	-6.28741	95.4323	100 - 16.1 - 3.06 - 0.354	HMDB0041207	Dide-O-methylsimmondsin	Organic compounds	Organic oxygen compounds	Organooxygen compounds	146.74	126.885	137.31	136.719	172.607	201.442	130.918	118.652	79.8645	118.264	192.871	138.525	120.138	88.23	189.255	162.461	112.209	261.23	104.79	115.73	65.9272	138.465	163.883	114.675	0.351319	0.134176
0.98_276.0646m/z	276.065	0.980583	neg	M+Cl	C11H15NO5	0.724197	87.3056	100 - 12.6 - 1.76 - 0.155	HMDB0014567	Methocarbamol	Organic compounds	Benzenoids	Phenol ethers	65.3182	62.1796	70.2513	74.2065	93.346	87.556	76.421	81.8005	59.7011	102.116	103.842	92.2139	56.8127	101.451	92.2044	98.3696	93.8555	101.072	70.9305	86.6127	81.2173	81.3909	114.463	105.489	0.342488	0.133911
5.36_302.3047m/z	302.305	5.3623	pos	2M+NH4	C9H18O	-2.34281	94.1588	100 - 9.98 - 0.651	HMDB0059887	(E)-6-Nonenol	Organic compounds	Lipids and lipid-like molecules	Fatty Acyls	20.5093	27.7221	31.8501	11.2484	6.52657	28.1766	50.4415	29.9705	28.2662	10.2277	6.56535	30.3746	25.2925	26.3805	21.1728	6.40088	17.6932	5.88638	29.865	3.21694	11.1377	9.45753	0.90662	1.17006	0.128491	0.132922
0.81_474.2188m/z	474.219	0.809867	pos	M+CH3OH+H	C21H31NO7S	7.22233	93.3747	100 - 24.5 - 8.83 - 1.64 - 0.269	HMDB0012607	18-Carboxy-dinor-LTE4	Organic compounds	Organic acids and derivatives	Carboxylic acids and derivatives	223.776	276.097	334.19	281.672	335.427	351.419	302.59	276.53	292.82	330.989	399.672	347.735	371.047	365.987	186.246	374.037	387.334	408.842	293.769	358.77	356.411	285.512	309.253	322.233	0.510111	0.130854
0.89_402.9928m/z	402.993	0.887717	neg	M+Cl	C10H13N2O11P	-6.12416	91.1799	100 - 12.1 - 2.93 - 0.296	HMDB0000218	Orotidylic acid	Organic compounds	Nucleosides, nucleotides, and analogues	Pyrimidine nucleotides	979.781	1906.77	1669.96	1042.91	2504.97	2262.16	1485.98	1335.29	1305.2	1953.75	2063.72	1977.54	1417.11	1950.24	1660.75	2132.11	2831.39	2441.56	1233.76	1367.48	1382.28	1739.06	2128.08	2177.52	0.451184	0.130128
1.29_170.0610m/z	170.061	1.29347	pos	M+H-2H2O	C11H11NO3	4.71024	87.7668	100 - 12.5 - 1.33 - 0.102	HMDB0059765	3-Indolehydracrylic acid	Organic compounds	Organoheterocyclic compounds	Indoles and derivatives	39.1275	43.1152	34.2837	65.6448	57.3801	42.2392	25.3688	44.6605	34.368	34.0736	44.9467	23.8264	41.0952	41.1779	54.5212	34.4211	38.4151	63.2248	19.2537	42.6687	54.7962	11.3944	24.0484	28.9378	0.0733687	0.126906
4.34_205.1225m/z	205.122	4.33792	neg	M-H	C13H18O2	-4.57107	86.425	100 - 14.3 - 1.36	HMDB0132940	1-(4-methoxyphenyl)-4-methylpent-1-en-3-ol	Organic compounds	Phenylpropanoids and polyketides	Cinnamyl alcohols	17.5114	15.7471	15.5564	15.01	25.3036	20.4757	38.8785	20.3303	27.9623	23.1819	21.2198	9.80421	31.0122	36.1601	22.7812	33.6847	32.1291	15.9403	28.7871	31.8284	25.4731	31.6396	32.5522	13.7131	0.100837	0.126311
2.39_906.0993m/z	906.099	2.38855	pos	2M+NH4	C17H16O12S	-7.8546	76.6736	100 - 19.8 - 8.85 - 1.46 - 0.288	HMDB0128847	{4-[2,3-dioxo-3-(2,4,6-trihydroxy-3-methoxyphenyl)propyl]-2-hydroxy-6-methoxyphenyl}oxidanesulfonic acid	Organic compounds	Phenylpropanoids and polyketides	Linear 1,3-diarylpropanoids	25.7419	79.3792	171.229	54.7856	150.47	71.2374	155.522	84.976	123.073	190.276	167.211	166.927	142.671	218.479	54.6081	227.334	92.5245	92.5165	188.981	154.705	142.036	75.988	123.182	56.1086	0.348435	0.125993
0.82_201.0370m/z	201.037	0.817	neg	M+Na-2H	C6H12O6	-5.97911	93.7662	100 - 6.86 - 1.43	HMDB0062473	Glycoprotein-phospho-D-mannose	Organic compounds	Organic oxygen compounds	Organooxygen compounds	112.85	165.185	193.271	121.046	224.142	260.764	217.823	122.793	124.332	292.925	187.665	169.006	139.537	202.606	151.966	208.161	283.652	215.355	164.196	163.434	195.15	213.906	219.473	244.02	0.872556	0.124285
0.76_304.0617m/z	304.062	0.759867	neg	M-H	C18H11NO4	0.462708	97.2296	100 - 20.1 - 2.74 - 0.28	HMDB0034364	Cepharadione A	Organic compounds	Alkaloids and derivatives	Aporphines	12.5848	35.6322	23.2398	14.5243	46.2617	37.7606	52.9612	31.4602	31.5792	84.8104	71.7315	33.2196	27.8887	50.3456	32.777	43.2115	76.8927	30.8259	37.6244	43.5753	45.0523	50.1715	48.5409	61.0588	0.125168	0.123664
8.83_256.9535m/z	256.954	8.83318	neg	M+FA-H	C4H8N2S4	-7.96424	77.2405	100 - 8.35 - 18.4 - 1.37 - 1.36	HMDB0059917	1,2-Ethanediyldicarbamodithioic acid	Organic compounds	Organic acids and derivatives	Dithiocarbamic acids and derivatives	64.7488	87.4806	84.017	64.2216	69.4397	66.7353	98.5792	87.3484	75.465	62.7982	28.7434	46.5459	78.8971	96.2639	66.8005	25.2598	67.1269	66.4011	82.0656	66.0992	79.5327	41.7752	32.9504	37.9281	0.630937	0.120965
5.53_923.0183m/z	923.018	5.533	neg	3M-H	C6H14O10P2	7.43166	91.3695	100 - 7.03 - 2.27 - 0.147	HMDB0001981	(R)-Mevalonic acid-5-pyrophosphate	Organic compounds	Organic oxygen compounds	Organic oxoanionic compounds	47.4832	71.3399	46.4296	29.3065	35.4201	39.9803	88.2233	63.8498	77.4897	38.5292	37.3748	21.4064	69.665	95.128	49.4924	38.1968	56.5936	21.636	82.657	68.6035	59.487	79.4233	50.9185	30.5991	0.618291	0.118699
4.84_863.6186n	864.625	4.84298	pos	M+2H, M+H	C46H89NO11S	3.40069	73.76	100 - 52.4 - 20.2 - 5.76 - 1.32 - 0.25	HMDB0012316	3-O-Sulfogalactosylceramide (d18:1/22:0)	Organic compounds	Lipids and lipid-like molecules	Sphingolipids	46.9231	34.5057	71.3156	38.3063	28.4643	93.0451	99.318	81.9314	55.8375	107.398	45.8951	92.6525	71.7805	74.886	72.5143	79.9915	75.5753	93.9096	55.6868	65.4883	115.85	28.7629	37.7143	111.175	0.245003	0.115911
2.09_1069.4784m/z	1069.48	2.08993	neg	M-H2O-H	C52H80O24	-7.06116	97.1026	100 - 58.1 - 21.5 - 5.95 - 1.36 - 0.265	HMDB0039292	Medicagenic acid 3-O-b-D-glucuronide 28-O-[b-D-xylosyl-(1->4)-a-L-rhamnosyl-(1->2)-a-L-arabinosyl] ester	Organic compounds	Lipids and lipid-like molecules	Prenol lipids	297.49	144.135	75.0922	297.262	114.251	106.174	178.263	133.569	51.9224	173.378	114.931	79.4438	42.2478	245.413	73.533	45.3321	302.54	47.6745	120.932	174.997	74.8432	158.35	252.604	98.2373	0.736137	0.114929
0.60_288.7675m/z	288.767	0.603417	neg	M-3H	C47H51NO15	-1.84048	59.0187	100 - 52.4 - 16.5 - 3.86 - 0.734 - 0.119	HMDB0060753	3'-p-Hydroxypaclitaxel	Organic compounds	Lipids and lipid-like molecules	Prenol lipids	27.6569	39.6538	48.0386	31.4523	44.8457	49.5029	44.2951	42.4238	49.3121	58.0034	61.6049	61.9003	42.2591	46.9971	41.2921	60.3467	79.9634	58.8414	46.0632	46.4074	35.5047	69.8449	54.958	53.8364	0.137612	0.112968
0.97_278.0527m/z	278.053	0.9663	neg	M-H	C8H14N3O6P	-7.38284	89.4199	100 - 10.1 - 1.7 - 0.137	HMDB0014513	Cidofovir	Organic compounds	Organoheterocyclic compounds	Diazines	36.6682	43.1723	53.1052	36.8441	48.1328	59.9581	53.2983	46.8671	44.5324	71.6025	56.8584	77.2634	40.7113	73.7632	54.8911	60.654	80.6764	55.1169	48.9258	46.2834	55.6061	63.2412	61.9258	66.4632	0.167832	0.111789
0.63_211.9696m/z	211.97	0.632	neg	M-H	C9H5Cl2NO	9.78946	51.8007	100 - 10.2 - 64.6 - 6.55 - 10.6 - 1.06	HMDB0015373	Chloroxine	Organic compounds	Organoheterocyclic compounds	Quinolines and derivatives	12.3425	36.9065	24.434	5.5975	45.9982	18.3659	23.6729	23.4891	10.0936	26.15	25.0616	13.1072	19.7126	24.6479	7.72823	16.499	45.7739	15.4112	14.6961	13.2207	15.6876	14.5819	4.61257	15.1916	0.354211	0.111505
1.98_719.2955m/z	719.296	1.9835	neg	3M-H	C12H16O5	4.81754	75.2488	100 - 13.4 - 1.85 - 0.168	HMDB0142074	3-(2,3,4-trimethoxyphenyl)propanoic acid	Organic compounds	Phenylpropanoids and polyketides	Phenylpropanoic acids	61.2731	15.3484	25.4619	39.7037	9.09448	14.9446	0	21.5748	11.9559	13.6973	32.5582	22.4601	19.0752	9.13763	51.6171	8.25213	18.8798	53.6116	7.45332	12.8239	5.91148	5.76532	27.5887	9.77902	0.257736	0.111315
0.61_694.4765m/z	694.477	0.610567	neg	M-H2O-H	C39H72NO8P	-7.28012	64.2816	100 - 43.7 - 11 - 2.01 - 0.295	HMDB0008837	PE(14:0/20:3(8Z,11Z,14Z))	Organic compounds	Lipids and lipid-like molecules	Glycerophospholipids	88.3252	56.8842	73.4591	70.7698	43.7511	65.586	60.2452	52.0605	39.6697	38.1893	74.8982	23.9772	42.6831	34.5491	73.7481	66.2382	64.8185	86.5934	44.6203	54.2114	48.5465	30.6024	65.9833	44.8014	0.15332	0.109407
0.95_290.9326m/z	290.933	0.952017	neg	2M-H	C6H4Cl2	6.28439	55.4012	100 - 6.54 - 64.1 - 4.18 - 10.3 - 0.669	HMDB0059855	m-Dichlorobenzene	Organic compounds	Benzenoids	Benzene and substituted derivatives	173.47	129.893	163.261	176.718	191.707	155.152	129.889	136.121	114.09	125.162	178.838	165.556	131.111	225.454	184.84	160.954	175.294	152.284	135.487	137.741	140.247	104.631	152.05	167.464	0.0906626	0.106419
1.39_784.1470m/z	784.147	1.39275	neg	M-H	C27H33N9O15P2	-3.68348	73.0856	100 - 33.4 - 8.51 - 1.6 - 0.255	HMDB0001248	FAD	Organic compounds	Nucleosides, nucleotides, and analogues	Flavin nucleotides	88.1737	118.7	98.1109	69.7372	150.107	110.745	144.223	135.026	85.9912	101.507	175.697	86.5697	89.5497	111.358	137.99	84.2133	105.461	179.919	69.4118	108.94	80.1754	77.6847	100.937	101.949	0.282181	0.106154
4.30_475.3288m/z	475.329	4.29507	neg	2M+FA-H	C10H21N3O2	8.9218	88.2397	100 - 12.2 - 1.1	HMDB0060817	Diethylcarbamazine N-oxide	Organic compounds	Organoheterocyclic compounds	Diazinanes	19.5213	48.9953	35.0696	17.2632	42.9336	44.7443	64.783	42.6074	47.1794	43.8316	49.2711	42.1234	56.6372	64.4795	40.8648	51.0259	52.4324	38.6092	47.4411	47.9453	40.238	52.379	50.4083	28.4953	0.068721	0.104053
0.96_249.0479m/z	249.048	0.95915	neg	M+Na-2H	C9H12N2O5	-6.2378	89.1462	100 - 10.8 - 1.56 - 0.126	HMDB0000012	Deoxyuridine	Organic compounds	Nucleosides, nucleotides, and analogues	Pyrimidine nucleosides	62.2942	29.5322	71.0471	65.3885	72.347	69.7215	44.652	54.588	24.9973	78.693	86.4362	85.3604	41.8979	114.718	74.1004	87.7794	118.356	59.7554	52.0326	56.0029	57.999	89.1278	77.229	91.6279	0.37788	0.102667
0.53_273.0078m/z	273.008	0.532	neg	M-H2O-H	C10H12O8S	1.37512	89.8503	100 - 12.1 - 6.83 - 0.729 - 0.145	HMDB0133893	2-[2-hydroxy-4-methoxy-3-(sulfooxy)phenyl]propanoic acid	Organic compounds	Organic acids and derivatives	Organic sulfuric acids and derivatives	87.5092	192.38	172.478	72.6157	188.848	196.497	228.66	160.846	232.136	219.087	187.507	232.127	235.453	286.413	173.77	204.113	298.212	125.381	213.793	198.437	194.088	176.556	139.487	115.592	0.0893357	0.100835
3.75_449.3490m/z	449.349	3.75435	pos	M+H-H2O	C23H51N2O5P	-2.65043	90.0859	100 - 26.4 - 4.37 - 0.542	HMDB0012082	LysoSM(d18:0)	Organic compounds	Lipids and lipid-like molecules	Sphingolipids	113.413	161.315	282.53	101.666	185.337	285.659	297.355	232.164	243.254	262.184	210.34	234.54	197.446	213.378	194.663	191.407	185.577	170.332	223.318	192.724	260.449	232.193	165.028	269.838	0.144889	0.0987024
2.56_581.3890m/z	581.389	2.55925	neg	2M-H	C21H25N	-1.99856	96.5843	100 - 23.4 - 2.61 - 0.185	HMDB0014995	Terbinafine	Organic compounds	Benzenoids	Naphthalenes	98.8678	211.977	200.246	131.4	202.246	190.235	215.749	186.562	204.011	187.705	183.035	196.254	211.472	211.381	169.958	212.332	243.789	221.895	167.868	195.585	198.434	172.203	174.915	175.784	0.10071	0.0942837
4.57_269.2107m/z	269.211	4.56508	neg	M-H	C16H30O3	-5.5917	86.7388	100 - 17.8 - 2.1 - 0.187	HMDB0030978	11-Oxohexadecanoic acid	Organic compounds	Lipids and lipid-like molecules	Fatty Acyls	39.9069	15.1304	41.6182	21.9449	42.7394	63.5612	78.2063	48.6953	46.8966	54.7344	77.8191	13.2281	62.7959	61.9375	47.6426	77.1014	47.139	59.2097	61.0812	57.8495	60.478	21.5293	12.0777	77.4112	0.32201	0.0938301
4.49_666.2739m/z	666.274	4.48722	neg	M-H	C39H41NO9	4.5574	67.4239	100 - 43.4 - 11 - 2.06 - 0.311	HMDB0040385	Neoacrimarine B	Organic compounds	Organoheterocyclic compounds	Quinolines and derivatives	22.31	50.0346	50.2303	14.9662	34.733	37.7147	50.2176	38.62	28.3577	47.253	24.1613	40.7526	51.8495	48.5794	38.6151	19.2061	24.2263	25.5505	42.7082	34.8485	43.9989	40.0477	44.5902	64.7488	0.438344	0.0924708
1.37_184.8761m/z	184.876	1.37133	neg	M+Na-2H	H2MoO4+2	4.46181	13.2871	60.7 - 0.106 - 38.4 - 65.4 - 68.9 - 39.9 - 100 - 0.5 - 40.5 - 0 - 0.329	HMDB0012260	Molybdate				57.3553	73.6433	84.1647	46.9091	68.4481	75.6285	74.2232	79.1267	50.2874	51.0968	70.0487	55.2917	79.3537	76.3892	101.65	31.5511	37.1525	42.1862	69.2295	76.3547	56.5368	68.3463	24.2508	51.7855	0.842324	0.0921108
4.20_345.1310m/z	345.131	4.19577	neg	2M-H	C7H11NO4	1.97252	91.4637	100 - 8.22 - 1.12	HMDB0006488	N-Acetyl-L-glutamate 5-semialdehyde	Organic compounds	Organic acids and derivatives	Carboxylic acids and derivatives	19.6006	34.6782	36.66	17.0292	42.2788	35.5295	55.5368	32.0281	37.7761	48.7367	28.4915	40.4467	53.5161	54.3025	29.7538	44.2167	49.4119	37.3737	39.286	49.369	36.2333	39.1823	37.034	25.5208	0.115113	0.0881372
0.77_277.0721m/z	277.072	0.767	neg	M+FA-H	C13H12O4	1.3777	87.1952	100 - 14.4 - 1.78 - 0.157	HMDB0128959	7-hydroxy-6-(3-oxobutyl)-2H-chromen-2-one	Organic compounds	Phenylpropanoids and polyketides	Coumarins and derivatives	30.8626	20.1725	27.4014	28.0468	13.5721	21.8516	131.926	33.0961	12.2669	192.405	99.0784	2.61106	34.8702	39.671	25.8552	56.1908	53.8618	27.9562	38.3635	55.7412	87.0342	23.87	27.0446	99.6672	0.161933	0.0867545
4.47_625.3057m/z	625.306	4.47293	neg	2M+FA-H	C14H26O4S	-5.01329	91.9816	100 - 16.4 - 6.6 - 0.899 - 0.124	HMDB0032223	Diisopentyl thiomalate	Organic compounds	Lipids and lipid-like molecules	Fatty Acyls	29.4968	56.2455	81.0304	22.9881	44.3384	62.0173	71.4295	42.7726	42.9239	66.4369	40.4621	64.858	62.4752	62.5601	48.1471	35.5904	62.344	45.1136	68.4979	51.5142	46.3398	50.8125	64.4293	71.9826	0.738465	0.0851487
0.54_159.0166m/z	159.017	0.539133	neg	M+Na-2H	C6H6N2O2	-7.34887	95.6493	100 - 7.37 - 0.646	HMDB0031338	5-Oxo-2(5H)-isoxazolepropanenitrile	Organic compounds	Organoheterocyclic compounds	Azoles	20.8053	39.2248	50.3297	23.3389	50.9138	51.6209	58.7137	46.2596	48.8991	61.636	50.3751	79.0645	47.9269	64.5911	50.5028	68.6628	83.0979	33.6752	50.1219	47.404	53.4203	48.1945	52.1589	39.9175	0.0694505	0.083558
3.14_242.2229m/z	242.223	3.14285	neg	M-H	C13H29N3O	-3.59658	85.9895	100 - 15.5 - 1.33	HMDB0029568	N5-Hexanoylspermidine	Organic compounds	Lipids and lipid-like molecules	Fatty Acyls	46.0381	66.7252	66.691	49.6269	57.0222	78.7561	134.389	61.3657	52.7746	149.676	84.7464	60.8444	63.1306	86.3421	44.5958	63.0535	73.2184	63.1473	57.1357	75.4646	59.8333	56.6824	53.9378	41.5674	0.0893991	0.0820484
0.82_229.0310m/z	229.031	0.82415	neg	M+Na-2H	C11H12O2S	2.74147	83.8672	100 - 12.9 - 5.7 - 0.628	HMDB0034759	Methyl 5-(1-Propynyl)-2-thiophenepropanoate	Organic compounds	Lipids and lipid-like molecules	Fatty Acyls	7.42638	17.4755	20.8082	10.5527	19.2992	19.3896	13.7182	9.44606	7.23022	25.4184	13.6989	10.6672	17.5418	25.4856	14.1942	21.0884	29.6815	20.8706	12.3668	17.3573	21.1174	8.79711	21.974	34.8608	0.197908	0.0811204
0.77_158.0219n	176.067	0.767017	pos	M+H, M+NH4	C6H6O5	2.27502	92.6192	100 - 6.75 - 1.22	HMDB0137818	benzene-1,2,3,4,5-pentol	Organic compounds	Benzenoids	Phenols	31.6809	48.9637	48.7464	50.5982	63.8738	77.7522	57.6583	45.9429	35.4653	52.1887	77.5088	36.246	63.9381	54.8265	4.57969	54.964	34.5263	70.1233	31.0338	64.4836	60.5979	17.9685	36.7319	55.9341	0.8435	0.0809104
5.36_709.0109m/z	709.011	5.36227	neg	2M-H	C14H14INO2	6.05252	86.1089	100 - 15.7 - 1.57 - 0.117	HMDB0060524	3-Iodothyronamine	Organic compounds	Benzenoids	Benzene and substituted derivatives	32.6592	47.2386	40.4562	16.8124	25.4092	22.4714	60.5119	47.2211	34.2662	42.696	39.8983	36.1985	67.7828	59.7262	41.0963	29.8224	46.0039	29.6954	55.4169	43.0286	57.2296	32.6302	14.8067	33.8317	0.264359	0.0772609
0.82_231.9654m/z	231.965	0.82415	neg	M+Cl	C5H11NO2Se	2.50983	0.598789	1.79 - 0.107 - 18.8 - 16.5 - 48.8 - 2.95 - 100 - 5.97 - 18.1 - 1.08	HMDB0003966	Selenomethionine	Organic compounds	Organic acids and derivatives	Carboxylic acids and derivatives	14.8248	24.2081	31.296	13.9268	30.8305	46.4348	29.8314	6.74167	21.2968	57.5963	23.337	22.1934	23.7255	38.4384	21.1597	30.9576	54.6967	21.795	33.9514	24.3054	29.5399	45.9035	35.4114	32.7811	0.727271	0.0763761
0.82_620.0153m/z	620.015	0.82415	neg	M-H2O-H	C15H24N5O17P3	-7.54223	79.9644	100 - 19 - 5.2 - 0.759 - 0.121	HMDB0006336	ADP-ribose 2'-phosphate	Organic compounds	Nucleosides, nucleotides, and analogues	Purine nucleotides	6.97225	37.1963	35.6601	2.27242	49.5931	33.213	44.6226	17.9712	16.2658	40.1957	45.9133	14.2189	22.4317	10.7296	36.3764	50.1908	14.3184	47.2461	45.2989	26.842	32.1329	63.9529	31.4519	16.2151	0.843178	0.0761453
0.82_285.1082n	303.146	0.817017	pos	M+H-2H2O, M+NH4	C10H15N5O5	3.02918	88.1941	100 - 13 - 1.81 - 0.162	HMDB0061067	arabinofuranosylguanine	Organic compounds	Nucleosides, nucleotides, and analogues	Purine nucleosides	94.9069	106.318	169.772	121.202	167.417	215.83	124.844	122.41	128.416	138.188	171.293	131.678	206.565	151.025	149.242	216.646	152.121	247.777	99.5085	142.246	127.582	159.912	182.747	127.454	0.0776262	0.0739075
0.58_504.7065m/z	504.706	0.582	neg	M-3H	C85H162O17P2	8.26821	53.2059	100 - 94.4 - 47.6 - 16.9 - 4.69 - 1.09 - 0.217	HMDB0124003	CL(8:0/18:2(9Z,11Z)/a-25:0/a-25:0)	Organic compounds	Lipids and lipid-like molecules	Glycerophospholipids	4.60896	15.9654	6.70838	2.38897	10.8186	6.08159e-06	14.0085	15.8635	18.5775	7.21538	9.23638	23.3331	17.3144	20.5339	8.99316	4.48301	29.2397	12.7233	11.9259	8.92621	16.5976	18.8742	14.026	4.59972	0.124089	0.0738049
3.79_506.3311m/z	506.331	3.79003	neg	M-H	C32H45NO4	6.85111	72.7288	100 - 35.6 - 6.99 - 0.982 - 0.109	HMDB0041430	Gymnodimine				14.1899	49.8704	57.2904	9.31907	64.6166	40.9914	72.8245	43.8809	60.39	39.5646	45.525	37.8869	55.1001	85.862	52.524	49.9135	94.404	39.5577	58.0278	41.3777	43.3073	49.6573	35.1901	39.0413	0.153368	0.0710368
1.30_144.0818m/z	144.082	1.30062	pos	M+H-H2O	C10H11NO	6.27968	89.9777	100 - 11.3 - 0.79	HMDB0040042	3-[(5-Methyl-2-furanyl)methyl]-1H-pyrrole	Organic compounds	Organoheterocyclic compounds	Pyrroles	84.8746	97.2421	107.146	123.028	154.103	136.76	118.514	120.147	104.608	147.967	138.765	141.118	123.371	117.015	130.254	137.965	150.692	156.14	114.927	133.962	138.793	103.387	117.993	137.206	0.38743	0.07101
3.86_249.1118m/z	249.112	3.86147	neg	2M-H	C5H7N3O	5.18865	93.444	100 - 6.62 - 0.394	HMDB0011601	3-Methylcytosine	Organic compounds	Organoheterocyclic compounds	Diazines	10.774	8.87087	5.88805	12.845	9.34492	6.98515	16.9095	14.1188	15.0175	11.5898	10.2828	4.26779	17.9636	18.7953	12.0312	17.6054	16.8307	8.56772	13.146	17.086	13.7259	8.9304	7.02663	15.0979	0.0751317	0.0705727
0.62_322.1122m/z	322.112	0.6177	neg	M-H2O-H	C12H23NO10	-6.26664	95.1957	100 - 14 - 2.96 - 0.323	HMDB0011668	6-(alpha-D-Glucosaminyl)-1D-myo-inositol	Organic compounds	Organic oxygen compounds	Organooxygen compounds	56.3268	57.642	41.0446	60.6799	61.0048	61.364	104.08	40.3555	73.5863	68.4604	61.118	95.4495	57.7793	41.9887	52.4592	62.075	116.941	47.4131	74.5502	73.1021	58.0594	80.8733	65.7251	60.9552	0.431202	0.0699566
0.55_318.9381m/z	318.938	0.546283	pos	M+H	C7H9ClO6P2S	7.85958	76.2057	100 - 8.7 - 38 - 3.25 - 2.04 - 0.158	HMDB0015265	Tiludronate	Organic compounds	Organic acids and derivatives	Organic phosphonic acids and derivatives	6.23909	12.3581	17.3956	4.07854	11.6906	16.338	14.7914	8.81532	20.495	23.2259	6.33863	16.0161	29.3713	30.4075	38.4797	9.22949	19.4897	10.7115	18.153	17.7678	12.0377	17.9057	11.7414	11.8275	0.078079	0.0679216
2.48_347.1327m/z	347.133	2.48138	neg	3M-H	C5H8O3	-5.97508	94.0212	100 - 5.61 - 0.745	HMDB0132477	2-(hydroxymethyl)but-2-enoic acid	Organic compounds	Lipids and lipid-like molecules	Fatty Acyls	23.7726	33.9605	52.1246	27.4434	48.4693	47.2613	53.7796	49.4361	47.7319	34.6787	38.3603	41.5432	40.6385	50.6515	40.5807	53.4418	44.9317	29.8771	46.3185	49.5351	49.8203	37.6496	42.4538	40.1948	0.649326	0.0671481
4.58_640.2447m/z	640.245	4.57937	neg	M+FA-H	C26H45NO10S2	-3.30723	75.8647	100 - 31 - 15.7 - 3.81 - 0.975 - 0.183	HMDB0002581	Taurocholic acid 3-sulfate	Organic compounds	Lipids and lipid-like molecules	Steroids and steroid derivatives	59.0692	167.589	192.506	59.8478	144.046	155.25	193.356	152.755	139.014	134.44	122.313	93.3627	192.194	255.085	155.322	175.211	204.814	138.472	165.818	144.392	143.206	108.23	86.74	114.888	0.0716852	0.0659254
5.06_450.3203m/z	450.32	5.05587	pos	M+ACN+H	C24H40O5	-2.58587	86.5597	100 - 26.6 - 4.43 - 0.551	HMDB0000917	Ursocholic acid	Organic compounds	Lipids and lipid-like molecules	Steroids and steroid derivatives	66.428	93.934	106.379	46.5997	94.2241	40.3268	92.8832	68.2005	101.233	50.318	55.5452	95.0915	67.13	147.151	99.5536	29.3265	106.228	51.2915	114.47	76.9372	78.3683	88.5427	54.3386	89.4246	0.932906	0.065393
2.28_165.0184m/z	165.018	2.28208	neg	M-H2O-H	C8H8O5	-4.81761	90.6496	100 - 8.94 - 1.38	HMDB0140912	2,3-dihydroxy-4-methoxybenzoic acid	Organic compounds	Benzenoids	Benzene and substituted derivatives	33.0433	63.4831	50.2323	28.6822	66.7611	71.4843	45.2888	60.7225	67.025	45.0493	54.5419	51.6024	52.8898	63.8206	49.3744	41.5398	52.6454	39.0142	42.6485	55.7828	39.6609	55.373	48.0464	44.6479	0.789525	0.062959
4.77_494.3457m/z	494.346	4.77155	pos	M+H+Na	C55H99NO10P+	-5.94351	55.3927	100 - 61.4 - 20.6 - 4.92 - 0.931 - 0.147	HMDB0061455	PC(MonoMe(13,5)/DiMe(13,5))	Organic compounds	Lipids and lipid-like molecules	Glycerophospholipids	39.6008	56.3563	76.3123	13.798	36.844	68.9879	82.5138	59.2678	74.4461	63.229	35.4625	66.4526	66.7638	97.8466	56.0459	79.8029	66.3149	32.1916	54.5276	57.1041	54.2901	57.3942	61.46	41.3744	0.326966	0.0625643
3.55_239.0585m/z	239.058	3.54788	neg	M+Cl	C11H12N2O2	-4.03261	93.1244	100 - 12.8 - 1.17	HMDB0060878	4-Hydroxyantipyrine	Organic compounds	Organoheterocyclic compounds	Azoles	27.9264	80.4535	135.316	43.7693	97.0089	164.013	193.116	71.3499	154.56	170.85	48.0967	150.448	103.445	117.062	49.0304	171.799	158.878	85.2934	86.8247	94.8931	62.5662	126.105	112.604	139.227	0.525632	0.0612867
5.23_444.3064n	479.282	5.22655	neg	M-H, M+Cl	C24H44O7	-5.21049	99.0003	100 - 26.7 - 4.87 - 0.666	HMDB0039225	2-Stearyl citrate	Organic compounds	Organic acids and derivatives	Carboxylic acids and derivatives	8.62458	17.0142	22.5024	8.80834	11.5901	10.4874	33.0951	30.0778	27.1214	13.9343	16.895	12.799	22.7942	30.8012	19.2607	12.6927	19.1963	6.25168	27.6374	31.0165	28.3624	16.9439	10.0213	6.69374	0.310199	0.0606586
4.47_339.2898m/z	339.29	4.47297	pos	M+CH3OH+H	C20H34O2	1.3986	92.607	100 - 22.1 - 2.74 - 0.246	HMDB0031058	Sciadonic acid	Organic compounds	Lipids and lipid-like molecules	Fatty Acyls	40.6031	77.7271	131.238	45.7811	94.1537	199.878	114.541	68.8131	76.0172	104.714	92.2741	90.3704	109.677	113.418	86.6992	149.592	116.677	126.851	82.3997	79.9362	65.9535	93.4132	56.7026	83.8645	0.247541	0.0590293
0.56_309.0798m/z	309.08	0.560567	neg	M-H	C11H18O10	-9.57269	89.1464	100 - 12.5 - 2.77 - 0.281	HMDB0127650	3,4,5-trihydroxy-6-{[3-hydroxy-2-(hydroxymethyl)-2-methylpropanoyl]oxy}oxane-2-carboxylic acid	Organic compounds	Organic oxygen compounds	Organooxygen compounds	36.5707	40.3638	35.7544	38.2825	47.7923	50.0396	54.1506	35.8544	47.5739	39.9399	50.7085	55.4879	42.3142	33.2572	38.7605	43.0033	59.0597	35.5114	39.7113	52.9089	48.8182	53.4147	45.5467	46.9261	0.292938	0.0584556
2.78_440.3107m/z	440.311	2.77998	neg	3M-H	C10H13N	8.18753	91.3284	100 - 11.3 - 0.583	HMDB0061785	3-Methyl-3-phenylazetidine	Organic compounds	Organoheterocyclic compounds	Azetidines	25.3605	28.6508	46.9185	23.8249	43.5211	38.0867	40.9478	37.1444	45.9895	35.1211	48.7546	30.3459	54.3104	70.6155	44.5384	42.4041	53.2146	38.8446	49.3259	41.0873	43.8249	44.3767	25.935	18.4778	0.0618104	0.0542279
0.81_454.2402n	472.287	0.809867	pos	M+H-2H2O, M+H, M+H-H2O, M+ACN+H, M+CH3OH+H, M+NH4	C20H38O11	-2.69437	55.5068	100 - 22.5 - 4.67 - 0.672	HMDB0033370	Ethyl cellulose	Organic compounds	Organooxygen compounds	Carbohydrates and carbohydrate conjugates	581.326	317.294	369.717	624.157	353.043	424.665	327.607	379.111	247.046	294.213	520.042	263.342	356.013	306.865	498.283	329.131	319.902	653.196	325.214	425.135	489.322	358.249	465.293	574.418	0.38334	0.0533564
4.72_618.4547m/z	618.455	4.72155	pos	2M+NH4	C20H28O2	4.96427	92.3242	100 - 22 - 2.72 - 0.244	HMDB0041925	Metandienone	Organic compounds	Lipids and lipid-like molecules	Steroids and steroid derivatives	79.8553	59.6561	58.7151	45.5538	24.1038	34.6538	52.0388	40.4288	433.704	12.8994	16.0988	537.84	81.1061	72.5834	103.9	57.4525	47.0241	99.8577	59.4203	80.8723	79.8088	45.996	58.9344	37.0752	0.236632	0.0528238
1.30_118.0663m/z	118.066	1.30062	pos	M+H-H2O	C8H9NO	8.6105	91.3173	100 - 9.16 - 0.578	HMDB0010715	2-Phenylacetamide	Organic compounds	Benzenoids	Benzene and substituted derivatives	40.8855	48.5236	49.4849	71.3555	62.5712	68.6803	55.6492	50.877	41.7242	55.3933	74.9481	62.147	60.3982	58.7537	60.7623	53.9346	57.5755	76.8986	49.6367	48.6652	49.3482	40.8359	51.1146	66.0009	0.380288	0.0497928
3.58_411.1096m/z	411.11	3.57645	neg	M+FA-H	C18H22O6S	-6.29993	91.3208	100 - 20.8 - 7.8 - 1.28 - 0.199	HMDB0012779	4-Hydroxyestrone sulfate	Organic compounds	Lipids and lipid-like molecules	Steroids and steroid derivatives	27.0341	27.0814	26.7589	14.896	11.3817	13.2434	33.437	19.0532	27.2684	23.7825	4.0277	3.44485	48.6139	37.779	28.1759	8.80484	22.857	5.90091	35.557	26.0935	33.1709	17.2433	15.3618	11.2609	0.763392	0.0468297
4.05_391.2834m/z	391.283	4.05292	neg	M-H	C24H40O4	-5.00746	91.9645	100 - 26.6 - 4.21 - 0.494	HMDB0002585	3b,12b-Dihydroxy-5b-cholanoic acid	Organic compounds	Lipids and lipid-like molecules	Steroids and steroid derivatives	5.65483	3.69742	2.65313	2.20682	0.661673	2.0667	13.5131	5.8996	1.66302	7.95001	0.867254	2.4461	4.15505	9.82296	3.67312	1.19297	4.30747	0.282422	12.475	7.35219	6.79194	5.86077	0.467705	3.07822	0.448087	0.0432779
4.32_466.3287m/z	466.329	4.32367	pos	M+ACN+H	C21H45O6P	-1.25456	82.7091	100 - 23.5 - 3.86 - 0.476	HMDB0011144	LysoPA(18:0e/0:0)	Organic compounds	Lipids and lipid-like molecules	Glycerophospholipids	39.1786	81.6063	100.491	40.881	113.457	125.792	110.518	74.1591	64.4355	99.7952	86.3925	123.033	109.614	108.045	73.9057	124.093	123.015	95.7858	80.4121	59.7803	78.1939	83.8011	57.1746	71.777	0.127969	0.0409612
0.82_403.2301m/z	403.23	0.817017	pos	M+CH3OH+H	C19H30O7	-6.88905	95.5922	100 - 21.2 - 3.57 - 0.439	HMDB0032842	5-Megastigmen-7-yne-3,9-diol 3-glucoside	Organic compounds	Organooxygen compounds	Carbohydrates and carbohydrate conjugates	169.713	93.9649	114.897	205.615	91.5078	120.649	97.3643	145.731	89.6216	66.8544	157.74	82.2796	129.332	112.508	354.524	102.345	122.066	232.107	92.056	125.63	58.7903	119.586	149.156	71.0288	0.169836	0.0408556
0.54_538.8896m/z	538.89	0.539133	neg	2M+FA-H	C6H6AsNO5	-1.97805	81.8078	100 - 7.11 - 1.24	HMDB0031822	Nitarsone	Organic compounds	Benzenoids	Benzene and substituted derivatives	14.9643	11.9742	17.8111	8.14988	7.38498	33.5634	32.8606	20.6261	23.2013	21.6042	14.6449	27.544	27.7329	33.2483	20.0354	16.7188	45.993	19.4215	11.2458	19.0483	17.924	28.7531	16.6036	13.6902	0.111048	0.0390668
2.91_389.1797m/z	389.18	2.90785	neg	3M-H	C6H10O3	-5.0529	97.162	100 - 6.72 - 0.807	HMDB0061881	4-Acetylbutyrate	Organic compounds	Lipids and lipid-like molecules	Fatty Acyls	36.2724	24.0591	29.184	40.0224	14.5035	30.2745	29.0373	32.1225	46.2105	14.9003	16.7195	13.647	36.5345	46.4136	24.41	22.8563	18.1636	9.9527	35.0611	40.0958	18.7614	19.7448	24.1348	14.7797	0.937478	0.0379371
0.53_289.9992m/z	289.999	0.532	neg	M-H2O-H	C8H12N3O6PS	-4.65583	94.5141	100 - 10.9 - 6.3 - 0.608 - 0.111	HMDB0060641	Lamivudine-monophosphate	Organic compounds	Nucleosides, nucleotides, and analogues	Nucleoside and nucleotide analogues	29.4711	71.7622	56.254	25.9942	45.7675	62.2319	49.4944	63.1984	77.2501	55.5309	40.4272	50.4099	60.6174	111.421	58.7678	47.9094	56.4782	15.2154	61.2762	53.6431	49.4111	41.2995	35.9658	29.1762	0.633312	0.029207
0.57_218.9328m/z	218.933	0.5677	neg	2M-H	C3H4Cl2	9.57836	55.85	100 - 3.29 - 64 - 2.1 - 10.2 - 0.336	HMDB0013592	1,3-Dichloropropene	Organic compounds	Organohalogen compounds	Vinyl halides	9.2261	18.047	23.8921	8.89925	23.6771	25.7704	15.1757	14.6444	18.3786	34.0289	12.892	21.9904	22.7747	34.8115	17.4212	27.8401	35.1192	15.5348	20.9749	14.5732	10.5946	35.6251	18.5382	12.9539	0.405639	0.028811
2.82_475.1803m/z	475.18	2.81568	neg	2M-H	C11H14N2O4	-6.63671	88.9117	100 - 12.9 - 1.59 - 0.134	HMDB0040988	Falimint	Organic compounds	Benzenoids	Benzene and substituted derivatives	32.1689	38.7669	47.5155	37.7958	44.1831	44.8445	48.5757	41.2377	52.7185	36.5821	37.6529	37.281	50.5724	58.2819	57.0755	40.9736	51.8157	33.6428	53.9717	52.5655	35.9231	48.048	34.4423	25.2001	0.404008	0.0267248
2.68_249.0308m/z	249.031	2.68068	neg	M+Cl	C13H10O3	-7.52226	92.2076	100 - 14.3 - 1.56 - 0.126	HMDB0130049	3-[(1E)-buta-1,3-dien-1-yl]-5-hydroxy-1H-isochromen-1-one	Organic compounds	Phenylpropanoids and polyketides	Isocoumarins and derivatives	272.155	244.117	282.205	349.233	311.092	346.521	238.282	287.14	209.133	279.703	382.685	266.006	279.866	287.082	355.968	365.972	357.165	484.591	205.437	257.52	247.063	269.459	332.303	297.936	0.060694	0.0265769
4.48_184.0745m/z	184.074	4.4801	pos	M+K	C7H15NO2	7.09311	91.8363	100 - 8.19 - 0.704	HMDB0094649	2-Aminoheptanoate	Organic compounds	Organic acids and derivatives	Carboxylic acids and derivatives	12.4308	24.0971	30.3817	18.1012	41.4166	50.2416	28.6836	16.2384	25.6894	42.0679	30.8228	27.2867	42.2032	35.5463	20.3195	44.6519	41.3214	56.7197	21.7385	24.047	32.7952	26.286	26.2146	33.9518	0.165164	0.0246694
2.11_644.1801n	323.097	2.11138	pos	M+2H, M+K	C31H32O15	9.22015	70.6126	100 - 34.5 - 8.84 - 1.68 - 0.27	HMDB0128747	6-({3,5-dihydroxy-2-[3-hydroxy-10-(3-methoxyphenyl)-2-oxo-4-oxatricyclo[4.3.1.0鲁,鈦穄decan-8-yl]-4-oxo-3,4-dihydro-2H-1-benzopyran-7-yl}oxy)-3,4,5-trihydroxyoxane-2-carboxylic acid	Organic compounds	Phenylpropanoids and polyketides	Flavonoids	38.506	23.6404	41.1243	28.3534	24.2759	53.0102	31.1441	30.5377	32.577	13.8848	39.3147	27.5702	41.767	26.9101	70.4174	31.0533	26.7014	60.623	22.9763	32.3411	30.9131	19.1338	29.3999	29.0295	0.139479	0.0243551
0.82_180.0653m/z	180.065	0.817	neg	M-H2O-H	C9H13NO4	-6.59892	93.5668	100 - 10.4 - 1.31	HMDB0035177	2-Acetyl-1,5,6,7-tetrahydro-6-hydroxy-7-(hydroxymethyl)-4H-azepine-4-one	Organic compounds	Organoheterocyclic compounds	Azepines	45.6059	44.9779	51.5576	59.8484	61.1375	65.359	47.5648	28.5205	26.4853	73.3175	83.7587	38.6118	36.6818	52.8145	56.5459	57.4849	94.7252	79.8821	36.1146	49.8589	58.5455	38.235	49.1987	93.2081	0.692642	0.024313
5.75_433.3324m/z	433.332	5.74587	neg	2M+FA-H	C13H22O	0.156345	86.9938	100 - 14.4 - 1.16	HMDB0041629	(3S,6E)-Nerolidol	Organic compounds	Lipids and lipid-like molecules	Prenol lipids	20.3054	19.1387	20.6591	15.5567	23.1745	14.0857	24.1352	28.3725	36.9063	28.6011	21.5074	19.4932	28.3511	44.6745	24.2502	24.5036	24.1026	25.2561	24.1119	32.7868	15.1362	10.5839	19.8965	20.1004	0.0543453	0.0242024
4.59_196.0246m/z	196.025	4.58652	neg	M-H	C8H7NO5	-2.54889	80.0427	100 - 9.29 - 1.41 - 0.104	HMDB0062403	4-hydroxy-3-nitrophenylacetate	Chemical entities	Organic compounds	Benzenoids	25.1766	19.9491	25.8852	25.0256	23.8433	20.9282	42.6702	34.9228	25.9012	24.6049	24.0662	13.0939	43.5191	40.0046	41.3464	26.1114	14.6527	25.1711	35.8118	34.171	22.8918	18.3682	17.9178	16.3669	0.376046	0.0210093
4.63_299.0942m/z	299.094	4.62937	neg	M-H2O-H	C17H18O6	5.37738	97.2773	100 - 18.8 - 2.9 - 0.325	HMDB0127845	2-[3-hydroxy-4-(methoxymethyl)phenyl]-3,4-dihydro-2H-1-benzopyran-3,5,7-triol	Organic compounds	Phenylpropanoids and polyketides	Flavonoids	203.052	147.206	151.895	215.663	182.285	177.756	211.809	193.995	171.892	191.694	217.906	142.909	163.12	231.585	150.707	176.591	201.523	176.956	205.784	199.453	189.903	179.401	179.13	168.508	0.93143	0.0195246
3.76_210.0763m/z	210.076	3.76147	neg	M+FA-H	C9H11NO2	-5.32796	89.9357	100 - 10.3 - 0.888	HMDB0001007	3-Pyridinebutanoic acid	Organic compounds	Organoheterocyclic compounds	Pyridines and derivatives	13.797	21.2677	30.5335	17.6843	25.4928	38.1353	19.69	31.9754	26.0022	25.9365	28.6965	30.8513	27.4031	33.1047	19.7986	21.3618	35.9743	22.622	22.6238	22.5284	33.1391	22.7738	23.0945	31.2327	0.893717	0.0151483
4.17_347.1972m/z	347.197	4.1672	neg	M+Na-2H	C22H30O2	-6.3732	78.2865	100 - 24.2 - 3.21 - 0.306	HMDB0060756	3b-Hydroxydesogestrel	Organic compounds	Lipids and lipid-like molecules	Steroids and steroid derivatives	7.76574	9.26075	24.4271	8.24288	11.9395	16.434	18.1276	14.056	11.9797	13.6909	9.3566	14.0713	27.0787	16.2461	22.2341	8.60855	14.1581	13.2553	23.3809	19.6899	10.4898	9.80431	5.63059	8.78865	0.61876	0.0126686
3.60_300.2903m/z	300.29	3.5979	pos	M+NH4	C18H34O2	1.9419	82.5028	100 - 19.9 - 2.29 - 0.194	HMDB0062242	7Z-octadecenoic acid	Organic compounds	Lipids and lipid-like molecules	Fatty Acyls	14.4667	20.6335	48.4717	17.6417	37.8236	59.2722	96.0633	35.9733	66.4499	79.6443	21.7232	81.3432	44.3506	40.788	88.1488	28.4076	29.7999	82.4992	31.7177	33.5883	49.6535	39.9963	23.4941	41.3753	0.0906633	0.0119037
5.35_745.0116m/z	745.012	5.34798	neg	2M+FA-H	C15H10O8S	-8.40339	79.6235	100 - 17.4 - 7.59 - 1.11 - 0.192	HMDB0137556	{2-hydroxy-5-[(6-hydroxy-3-oxo-2,3-dihydro-1-benzofuran-2-ylidene)methyl]phenyl}oxidanesulfonic acid	Organic compounds	Phenylpropanoids and polyketides	Aurone flavonoids	35.9572	63.0954	60.2317	30.4621	29.9729	49.6924	84.2179	53.4548	63.1454	39.6888	64.3698	22.5937	74.2884	67.9784	56.2796	61.5236	61.5773	28.8397	61.0619	69.5245	47.7829	48.4606	12.9264	33.7853	0.505888	0.0104314
2.49_803.2876m/z	803.288	2.48853	neg	2M-H	C21H26N2O2S2	9.57377	84.1878	100 - 25.4 - 12.5 - 2.57 - 0.573	HMDB0042015	Sulforidazine	Organic compounds	Organoheterocyclic compounds	Benzothiazines	176.719	134.495	159.496	196.736	133.044	173.09	112.351	171.618	123.825	67.7557	195.193	90.2857	119.614	165.673	253.174	143.348	154.633	283.942	120.583	173.538	153.489	98.7263	160.653	141.121	0.143957	0.0100329
3.14_342.0998m/z	342.1	3.14285	neg	M-H	C18H17NO6	4.3014	80.2704	100 - 20.3 - 3.18 - 0.367	HMDB0029285	Avenanthramide 1s	Organic compounds	Phenylpropanoids and polyketides	Cinnamic acids and derivatives	67.5907	94.8712	98.8826	76.2466	81.0651	96.3042	211.191	101.747	94.7489	166.942	120.086	76.7692	116.728	144.776	91.1715	106.979	141.528	85.5839	119.063	105.225	101.682	87.4968	72.5178	72.988	0.0904221	0.00962541
0.56_442.8913m/z	442.891	0.560567	neg	M+Na-2H	C17H12Br2O3	3.20232	17.6071	50.8 - 9.47 - 100 - 18.5 - 50.3 - 9.16 - 1.1	HMDB0041834	Benzbromarone	Organic compounds	Organic oxygen compounds	Organooxygen compounds	43.2228	41.132	54.3006	42.1564	42.3635	63.5275	48.7613	34.2534	37.7217	43.708	37.8448	51.6614	44.4723	56.9496	46.1823	43.396	79.8718	39.3048	46.9974	51.2732	38.4163	58.761	29.5405	50.4381	0.514645	0.00950337
4.12_256.1906m/z	256.191	4.1172	neg	M+FA-H	C13H25NO	-5.73739	87.0612	100 - 14.8 - 1.22	HMDB0037834	Ethyl menthane carboxamide	Organic compounds	Lipids and lipid-like molecules	Prenol lipids	14.4042	18.3395	19.766	12.1226	17.103	16.8607	22.2607	14.426	14.1388	12.7653	13.116	14.0277	14.9359	23.7747	16.7353	8.69532	20.1373	17.5264	19.2779	18.9847	17.3425	9.99443	12.2879	14.8404	0.831579	0.00804194
3.23_359.0750m/z	359.075	3.22787	neg	2M+FA-H	C6H7NO4	5.52886	93.1796	100 - 7.09 - 1.04	HMDB0001241	2-Aminomuconic acid	Organic compounds	Organic acids and derivatives	Carboxylic acids and derivatives	28.6818	35.6552	30.1545	29.3697	34.3464	21.6993	34.7898	33.9419	29.0492	39.835	18.8515	17.2619	42.9618	56.6207	33.8669	16.0477	30.1225	22.5924	32.1624	25.3716	37.2071	31.4191	23.3425	22.781	0.780591	0.0046683
0.62_373.2074m/z	373.207	0.62485	neg	M-H2O-H	C25H30NO3+	6.87803	95.9741	100 - 27.9 - 4.35 - 0.492	HMDB0014354	Trospium	Organic compounds	Benzenoids	Benzene and substituted derivatives	529.357	427.793	384.935	579.477	552.125	600.717	290.598	352.055	470.369	223.747	606.605	683.948	476.954	281.518	658.74	574.55	717.784	679.82	390.76	531.976	378.8	553.821	592.662	368.793	0.439607	0.00457434
4.27_526.2951m/z	526.295	4.2665	neg	M-H	C27H46NO7P	2.16637	95.1453	100 - 30.4 - 5.89 - 0.856 - 0.101	HMDB0011525	LysoPE(22:5(7Z,10Z,13Z,16Z,19Z)/0:0)	Organic compounds	Lipids and lipid-like molecules	Glycerophospholipids	220.685	575.887	888.558	227.334	629.999	1040.24	1325.64	724.57	568.717	1291.3	823.235	574.183	611.43	508.001	484.339	682.683	457.843	564.978	736.988	574.181	656.597	817.927	707.27	664.48	0.12589	0.00352543
1.98_279.1372m/z	279.137	1.98352	pos	M+H	C11H22N2O4S	-0.442559	83.2692	100 - 13.8 - 6.23 - 0.737 - 0.104	HMDB0003426	Pantetheine	Organic compounds	Organic acids and derivatives	Carboxylic acids and derivatives	39.5395	33.262	45.1008	58.2361	20.6191	55.3707	19.2292	35.2512	24.0086	3.88185	30.5781	8.76701	53.6008	29.1826	116.311	30.6836	21.3705	89.0416	23.9757	49.7516	41.0071	24.6554	27.8342	17.0152	0.0552256	0.00311732
